# Supplementary material for: Metal-free synthesis of difluoro/trifluoromethyl carbinol-containing chromones via tandem cyclization of o-hydroxyaryl enaminones
Source: Royal Society of Chemistry journal article supplement (doi:10.1039/d3ob01582c), 2023-01-01
Supplement: d3ob01582c1.pdf [file d3ob01582c1.pdf]

# Electronic Supplementary Information

## Metal-Free Synthesis of Difluoro/Trifluoromethyl Carbinol-Containing Chromones *via* Tandem Cyclization of *o*-Hydroxyaryl Enaminones

Long-Hui Wu,<sup>†a</sup> Xia Liu,<sup>†a</sup> Zhao-Wen Liu,<sup>\*a</sup> Zhi-Xi Chen,<sup>a</sup> Xin-Lei Fu,<sup>a</sup> and Kai Yang<sup>\*a</sup>

<sup>a</sup> College of pharmacy, Gannan Medical University, Ganzhou 341000, P. R. China.

*E-mail:* kai\_yangyang@126.com; kai\_yang@gmu.edu.cn; liuzhaowenyifan@126.com

### Table of Contents

|                                                                                                                                                    |          |
|----------------------------------------------------------------------------------------------------------------------------------------------------|----------|
| General Information.....                                                                                                                           | [2]      |
| Experimental Procedure for Compounds <b>1a-1m</b> .....                                                                                            | [3]      |
| Experimental Procedure for Compounds <b>3a-3m</b> and <b>4a-4l</b> .....                                                                           | [4]      |
| Experimental Procedure for Compounds <b>5a-5q</b> .....                                                                                            | [5]      |
| Experimental Procedure for Compounds <b>6a-6d</b> .....                                                                                            | [6]      |
| Experimental Procedure for Compound <b>6e</b> .....                                                                                                | [7]      |
| Reaction of <i>o</i> -aminophenyl enaminone with <b>2a</b> or <b>2b</b> .....                                                                      | [8]      |
| Characterization Data for All Products <b>3a-3m</b> , <b>4a-4l</b> , <b>5a-5q</b> and <b>6a-6e</b> .....                                           | [9-21]   |
| Data of Single-crystal X-ray Analysis for <b>3k</b> .....                                                                                          | [22]     |
| <sup>1</sup> H, <sup>13</sup> C and <sup>19</sup> F NMR Spectra for All Products <b>3a-3m</b> , <b>4a-4l</b> , <b>5a-5q</b> and <b>6a-6e</b> ..... | [23-137] |
| References.....                                                                                                                                    | [138]    |

## General Information

Melting point (m.p.) was performed on a Büchi Melting Point B-545 instrument without correcting.  $^1\text{H}$ ,  $^{13}\text{C}$  and  $^{19}\text{F}$  NMR spectra were collected on a BRUKER DRX-400 spectrometer in  $\text{CDCl}_3$  (or  $\text{DMSO-d}_6/\text{CD}_3\text{OD}$ ) using tetramethylsilane (TMS) as an internal standard. High-resolution mass spectra (HRMS) were obtained with a LCMS-IT-TOF mass spectrometer. Single-crystal X-ray analysis was obtained using Bruker APEX2 Smart CCD. TLC was performed by using commercially prepared 100-400 mesh silica gel plates (GF254) and visualization was detected at 254 or 365 nm. All reagents and solvents were purchased from commercial sources and used without further purification. (2*E*)-3-(dimethylamino)-1-(2-hydroxyphenyl)prop-2-en-1-one **1** were synthesized from 2'-hydroxyacetophenone and *N,N*-dimethylformamide dimethyl acetal (see the following for details).

## Experimental Procedure for Compounds 1a-1m

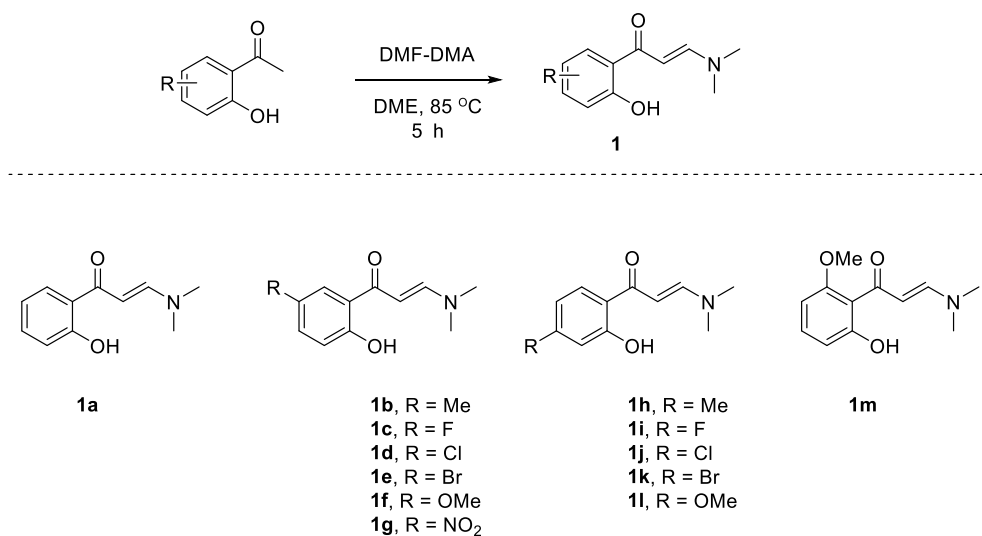

**Scheme S1**

According to the reported procedure<sup>[1, 2]</sup>, compounds **1a-1m** were synthesized. 2'-Hydroxyacetophenone (20.0 mmol, 1.0 equiv) and *N,N*-Dimethylformamide dimethyl acetal (60.0 mmol, 3.0 equiv) in DMA (30.0 mL) was refluxed for 5 h. After monitoring the end of the reaction on TLC, the mixture was cooled to room temperature. Upon completion of the reaction, the resulting mixture was concentrated in vacuo. The crude product is recrystallized in petroleum ether to obtain the required compound **1a-1m**.

## Experimental Procedure for Compounds 3a-3m

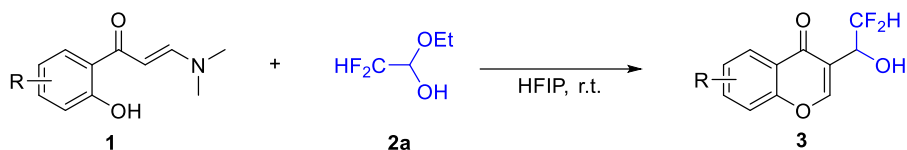

Scheme S2

Hydroxyaryl enaminone (0.2 mmol, 1.0 equiv.) and difluoroacetaldehyde ethyl hemiacetal (0.24 mmol, 1.2 equiv.) were stirred in HFIP (1.0 mL) at room temperature for 12 h. After monitoring the end of the reaction on TLC, the residue was purified by column chromatography on silica gel (petroleum ether/ethyl acetate 5:1) to give the pure product **3a-3m**.

## Experimental Procedure for Compounds 4a-4l

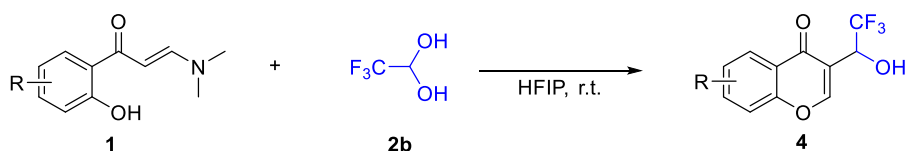

Scheme S3

Hydroxyaryl enaminone (0.2 mmol, 1.0 equiv.) and trifluoroacetaldehyde hydrate (0.4 mmol, 2.0 equiv.) were stirred in HFIP (1.0 mL) at room temperature for 12 h. After monitoring the end of the reaction on TLC, the residue was purified by column chromatography on silica gel (petroleum ether/ethyl acetate 5:1) to give the pure product **4a-4l**.

## Experimental Procedure for Compounds 5a-5q

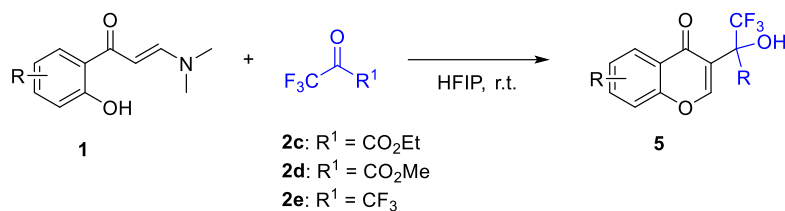

Scheme S4

Hydroxyaryl enaminones (0.2 mmol, 1.0 equiv.) and methyl trifluoropyruvate (0.24 mmol, 1.2 equiv.)/ethyl trifluoropyruvate (0.24 mmol, 1.2 equiv.)/hexafluoroacetone trihydrate (0.6 mmol, 3.0 equiv.) were stirred in HFIP (1.0 mL) at room temperature for 12 h. After monitoring the end of the reaction on TLC, the residue was purified by column chromatography on silica gel (petroleum ether/ethyl acetate 5:1) to give the pure product **5a-5q**.

## Experimental Procedure for Compounds **6a** and **6b**

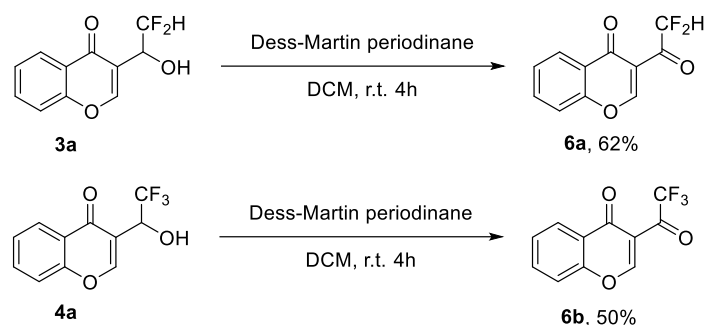

Scheme S5

Compounds **3a** (0.1 mmol, 1.0 equiv.) or compounds **4a** (0.1 mmol, 1.0 equiv.), Dess-Martin periodinane (0.37 mmol, 3.7 equiv.) in DCM (1.0mL), white were stirred in a ground glass test tube at room temperature for 4 h. After monitoring the end of the reaction on TLC, the residue was purified by column chromatography on silica gel (petroleum ether/ethyl acetate 5:1) to give the pure product **6a** and **6b**.

## Experimental Procedure for Compounds **6c** and **6d**

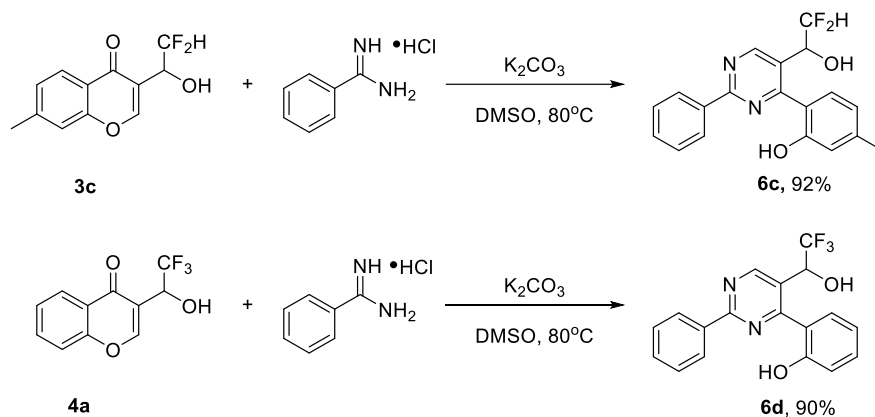

Scheme S6

Compounds **3c** (0.2 mmol, 1.0 equiv.) or compounds **4a** (0.2 mmol, 1.0 equiv.), benzamidine hydrochloride (0.4 mmol, 2.0 equiv.),  $\text{K}_2\text{CO}_3$ (0.4 mmol, 2.0 equiv.) in DMSO (1.0 mL), which were stirred in a ground glass test tube at 80 °C for 4 h. After monitoring the end of the reaction on TLC, the residue was purified by column chromatography on silica gel (petroleum ether/ethyl acetate 1:1) to give the pure product **6c** and **6d**.

## Experimental Procedure for Compound 6e

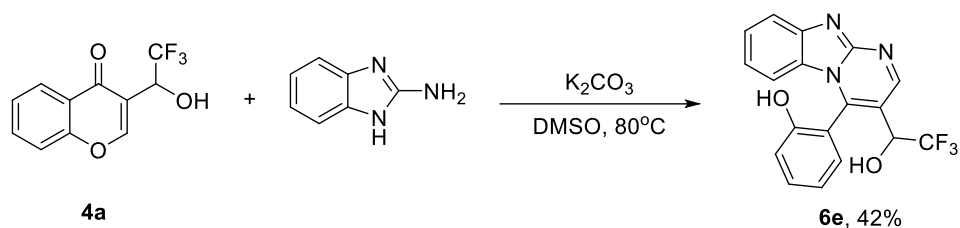

Scheme S7

Compound **4a** (0.2 mmol, 1.0 equiv.), 2-aminobenzimidazole (0.24 mmol, 1.2 equiv.), K<sub>2</sub>CO<sub>3</sub> (0.24 mmol, 1.2 equiv.) in DMSO (1.0 mL), reacted at 80 °C for 12 h. After monitoring the end of the reaction on TLC, the resulting mixture was extracted with ethyl acetate, and the combined organic layers were washed with brine, dried over Na<sub>2</sub>SO<sub>4</sub>, filtered and concentrated. The residue was purified with silica gel chromatography (petroleum ether/ethyl acetate = 1:2) to give the correcting product **6e**.

## Reaction of *o*-aminophenyl enaminone with **2a** or **2b**.

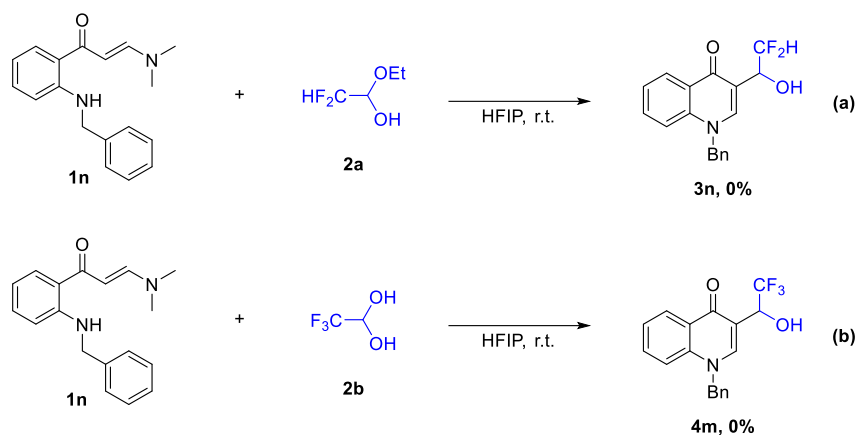

Scheme S8

*(E)*-1-(2-(benzylamino)phenyl)-3-(dimethylamino)prop-2-en-1-one **1n** (0.2 mmol, 1.0 equiv.) and trifluoroacetaldehyde hydrate **2a** (0.24 mmol, 1.2 equiv.) or trifluoroacetaldehyde hydrate **2b** (0.4 mmol, 2.0 equiv.) were stirred in HFIP (1.0 mL) at room temperature for 12 h. Unfortunately, the expected difluoro/trifluoromethylated carbinols **3n** or **4m** could not be obtained.



## Characterization Data for the Products 3a-3m

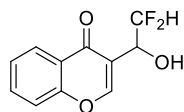

3-(2,2-Difluoro-1-hydroxyethyl)-4H-chromen-4-one (**3a**): white solid, 45 mg, 99% yield; m.p. 145-147 °C; <sup>1</sup>H NMR (400 MHz, CDCl<sub>3</sub>), δ, ppm: 4.27 (*br*, 1H), 4.71-4.86 (*m*, 1H), 6.13 (*td*, *J* = 55.8, 3.8 Hz, 1H), 7.45-7.53 (*m*, 2H), 7.72-7.79 (*m*, 1H), 8.04 (*s*, 1H), 8.21 (*dd*, *J* = 8.0, 1.2 Hz, 1H); <sup>19</sup>F NMR (376 MHz, CDCl<sub>3</sub>), δ, ppm: -127.1 (*d*, *J* = 282.3 Hz, 1F), -130.1 (*d*, *J* = 281.8 Hz, 1F); <sup>13</sup>C NMR (100 MHz, CDCl<sub>3</sub>), δ, ppm: 69.8 (*t*, *J* = 25.2 Hz), 114.1 (*t*, *J* = 245.1 Hz), 118.35, 118.44, 123.6, 125.6, 125.8, 134.6, 154.9, 156.3, 178.1; ESI-HRMS, *m/z*: Calcd for C<sub>11</sub>H<sub>9</sub>F<sub>2</sub>O<sub>3</sub><sup>+</sup> [M+H]<sup>+</sup>: 227.0514, found: 227.0534.

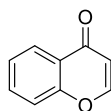

4H-Chromen-4-one (**3a'**): white solid, 8 mg, 26% yield; m.p. 53-54 °C (51-52 °C<sup>[3]</sup>); <sup>1</sup>H NMR (400 MHz, CDCl<sub>3</sub>), δ, ppm: 6.35 (*dd*, *J* = 6.0, 1.5 Hz, 1H), 7.39-7.47 (*m*, 2H), 7.65-7.70 (*m*, 1H), 7.87 (*d*, *J* = 6.0 Hz, 1H), 8.20 (*d*, *J* = 8.0 Hz, 1H).

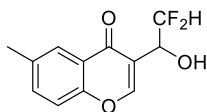

3-(2,2-Difluoro-1-hydroxyethyl)-6-methyl-4H-chromen-4-one (**3b**): white solid, 52 mg, 98% yield; <sup>1</sup>H NMR (400 MHz, CDCl<sub>3</sub>), δ, ppm: 2.37 (*s*, 3H), 4.51 (*br*, 1H), 4.71-4.78 (*m*, 1H), 6.04 (*td*, *J* = 56.1, 3.7 Hz, 1H), 7.30 (*d*, *J* = 8.6 Hz, 1H), 7.43-7.45 (*m*, 1H), 7.87 (*s*, 1H), 7.95 (*s*, 1H); <sup>19</sup>F NMR (376 MHz, CDCl<sub>3</sub>), δ, ppm: -126.7 (*d*, *J* = 281.2 Hz, 1F), -130.4 (*d*, *J* = 281.2 Hz, 1F); <sup>13</sup>C NMR (100 MHz, CDCl<sub>3</sub>), δ, ppm: 21.0, 69.4 (*t*, *J* = 30.6 Hz), 114.2 (*t*, *J* = 244.7 Hz), 116.6, 118.0, 118.4 (*t*, *J* = 3.3 Hz), 123.2, 124.8, 135.8, 155.0, 178.1; ESI-HRMS, *m/z*: Calcd for C<sub>12</sub>H<sub>11</sub>F<sub>2</sub>O<sub>3</sub><sup>+</sup> [M+H]<sup>+</sup>: 241.0671, found: 241.0680.

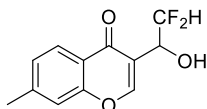

3-(2,2-Difluoro-1-hydroxyethyl)-7-methyl-4H-chromen-4-one (**3c**): white solid, 49 mg, 91% yield; m.p. 114-116 °C; <sup>1</sup>H NMR (400 MHz, CDCl<sub>3</sub>), δ, ppm: 2.41 (*s*, 3H), 4.52 (*br*, 1H), 4.69-4.76 (*m*, 1H), 6.04 (*td*, *J* = 55.9, 3.8 Hz, 1H), 7.16-7.19 (*m*, 2H), 7.92 (*s*, 1H), 7.97 (*d*, *J* = 8.1 Hz, 1H); <sup>19</sup>F NMR (376 MHz, CDCl<sub>3</sub>), δ, ppm: -127.10 (*d*, *J* = 282.4 Hz, 1F), -130.31 (*d*, *J* = 282.4 Hz, 1F); <sup>13</sup>C NMR (100 MHz, CDCl<sub>3</sub>), δ, ppm: 21.9, 69.4 (*t*, *J* = 25.3 Hz), 114.2 (*t*, *J* = 244.6 Hz), 118.0, 118.4 (*t*, *J* = 3.2 Hz), 121.3, 125.3, 127.3, 146.1, 154.8, 156.4, 177.9; ESI-HRMS, *m/z*: Calcd for C<sub>12</sub>H<sub>11</sub>F<sub>2</sub>O<sub>3</sub><sup>+</sup> [M+H]<sup>+</sup>: 241.0671, found: 241.0680.

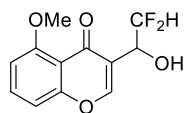

3-(2,2-Difluoro-1-hydroxyethyl)-5-methoxy-4*H*-chromen-4-one (**3d**): white solid, 50 mg, 97% yield; m.p. 104-106 °C; <sup>1</sup>H NMR (400 MHz, CDCl<sub>3</sub>), δ, ppm: 4.00 (*s*, 3H), 4.53 (*br*, 1H), 4.67-4.71 (*m*, 1H), 6.14 (*td*, *J* = 56.3, 4.2 Hz, 1H), 6.85 (*d*, *J* = 8.3 Hz, 1H), 7.05 (*d*, *J* = 8.5 Hz, 1H), 7.61 (*t*, *J* = 8.4 Hz, 1H), 7.89 (*s*, 1H); <sup>19</sup>F NMR (376 MHz, CDCl<sub>3</sub>), δ, ppm: -126.0 (*d*, *J* = 282.9 Hz, 1F), -130.0 (*d*, *J* = 282.3 Hz, 1F); <sup>13</sup>C NMR (100 MHz, CDCl<sub>3</sub>), δ, ppm: 56.5, 69.9 (*t*, *J* = 28.5 Hz), 106.7, 110.3, 114.2 (*t*, *J* = 244.8 Hz), 116.5, 119.7, 134.7, 153.3, 158.2, 159.9, 178.2; ESI-HRMS, *m/z*: Calcd for C<sub>12</sub>H<sub>11</sub>F<sub>2</sub>O<sub>4</sub><sup>+</sup> [M+H]<sup>+</sup>: 257.0620, found: 257.0610.

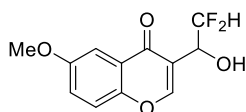

3-(2,2-Difluoro-1-hydroxyethyl)-6-methoxy-4*H*-chromen-4-one (**3e**): yellow solid, 50 mg, 95% yield; m.p. 101-103 °C; <sup>1</sup>H NMR (400 MHz, CDCl<sub>3</sub>), δ, ppm: 3.82 (*s*, 3H), 4.50 (*br*, 1H), 4.73-4.79 (*m*, 1H), 6.04 (*td*, *J* = 55.9, 3.7 Hz, 1H), 7.22 (*dd*, *J* = 9.1, 3.1 Hz, 1H), 7.35 (*d*, *J* = 9.2 Hz, 1H), 7.44 (*d*, *J* = 3.0 Hz, 1H), 7.96 (*s*, 1H); <sup>19</sup>F NMR (376 MHz, CDCl<sub>3</sub>), δ, ppm: -127.18 (*d*, *J* = 282.2 Hz, 1F), -130.35 (*d*, *J* = 281.5 Hz, 1F); <sup>13</sup>C NMR (100 MHz, CDCl<sub>3</sub>), δ, ppm: 56.0, 69.4 (*t*, *J* = 24.5 Hz), 104.4, 114.2 (*t*, *J* = 244.7 Hz), 117.8 (*t*, *J* = 3.3 Hz), 119.7, 124.2, 124.7, 151.2, 154.8, 157.3, 177.8; ESI-HRMS, *m/z*: Calcd for C<sub>12</sub>H<sub>11</sub>F<sub>2</sub>O<sub>4</sub><sup>+</sup> [M+H]<sup>+</sup>: 257.0620, found: 257.0610.

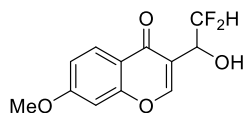

(2,2-Difluoro-1-hydroxyethyl)-7-methoxy-4*H*-chromen-4-one (**3f**): white solid, 48 mg, 99% yield; m.p. 101-103 °C; <sup>1</sup>H NMR (400 MHz, CDCl<sub>3</sub>), δ, ppm: 3.84 (*s*, 3H), 4.45 (*br*, 1H), 4.66-4.72 (*m*, 1H), 6.04 (*td*, *J* = 56.0, 3.8 Hz, 1H), 6.78 (*d*, *J* = 2.4 Hz, 1H), 6.93 (*dd*, *J* = 9.0, 2.4 Hz, 1H), 7.88 (*s*, 1H), 8.00 (*d*, *J* = 9.0 Hz, 1H); <sup>19</sup>F NMR (376 MHz, CDCl<sub>3</sub>), δ, ppm: -126.99 (*d*, *J* = 281.7 Hz, 1F), -130.14 (*d*, *J* = 281.4 Hz, 1F); <sup>13</sup>C NMR (100 MHz, CDCl<sub>3</sub>), δ, ppm: 56.0, 69.6 (*t*, *J* = 24.8 Hz), 100.2, 114.2 (*t*, *J* = 244.8 Hz), 115.4, 117.4, 118.4 (*t*, *J* = 3.1 Hz), 126.9, 154.5, 158.2, 164.7, 177.4; ESI-HRMS, *m/z*: Calcd for C<sub>12</sub>H<sub>11</sub>F<sub>2</sub>O<sub>4</sub><sup>+</sup> [M+H]<sup>+</sup>: 257.0620, found: 257.0610.

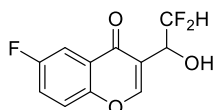

3-(2,2-Difluoro-1-hydroxyethyl)-6-fluoro-4*H*-chromen-4-one (**3g**): white solid, 46 mg, 94% yield; m.p. 138-140 °C; <sup>1</sup>H NMR (400 MHz, CDCl<sub>3</sub>), δ, ppm: 4.80-4.87 (*m*, 1H), 6.12 (*td*, *J* = 55.8, 3.6 Hz, 1H), 7.44-7.49 (*m*, 1H), 7.53-7.56 (*m*, 1H), 7.84 (*dd*, *J* = 8.0, 3.0 Hz, 1H), 8.07 (*s*,

1H);  $^{19}\text{F}$  NMR (376 MHz,  $\text{CDCl}_3$ ),  $\delta$ , ppm: -113.78 (*s*, 1F), -127.49 (*d*,  $J = 281.7$  Hz, 1F), -130.60 (*d*,  $J = 282.5$  Hz, 1F);  $^{13}\text{C}$  NMR (100 MHz,  $\text{CDCl}_3$ ),  $\delta$ , ppm: 69.3 (*t*,  $J = 25.0$  Hz), 110.5 (*d*,  $J = 24.0$  Hz), 114.0 (*t*,  $J = 244.9$  Hz), 118.0 (*t*,  $J = 3.0$  Hz), 120.5 (*d*,  $J = 8.0$  Hz), 122.9 (*d*,  $J = 26.0$  Hz), 124.7 (*d*,  $J = 7.0$  Hz), 152.6, 155.2, 159.8 (*d*,  $J = 253.0$  Hz), 177.2; ESI-HRMS,  $m/z$ : Calcd for  $\text{C}_{11}\text{H}_8\text{F}_3\text{O}_3^+$   $[\text{M}+\text{H}]^+$ : 245.0420, found: 245.0413.

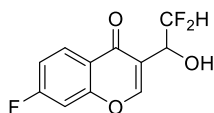

3-(2,2-Difluoro-1-hydroxyethyl)-7-fluoro-4*H*-chromen-4-one (**3h**): white solid, 49 mg, 99% yield; m.p. 107 -109 °C;  $^1\text{H}$  NMR (400 MHz,  $\text{CDCl}_3$ ),  $\delta$ , ppm: 4.42 (*br*, 1H), 4.84-4.91 (*m*, 1H), 6.12 (*td*,  $J = 55.7, 3.4$  Hz, 1H), 7.16-7.21 (*m*, 2H), 8.06 (*s*, 1H), 8.22 (*dd*,  $J = 9.6, 6.2$  Hz, 1H);  $^{19}\text{F}$  NMR (376 MHz,  $\text{CDCl}_3$ ),  $\delta$ , ppm: -100.99 (*s*, 1F), -127.55 (*d*,  $J = 281.3$  Hz, 1F), -130.87 (*d*,  $J = 282.2$  Hz, 1F);  $^{13}\text{C}$  NMR (100 MHz,  $\text{CDCl}_3$ ),  $\delta$ , ppm: 68.8 (*t*,  $J = 25.0$  Hz), 104.9 (*d*,  $J = 25.3$  Hz), 114.0 (*t*,  $J = 244.6$  Hz), 114.7 (*d*,  $J = 22.8$  Hz), 119.0 (*t*,  $J = 3.4$  Hz), 120.4, 128.3 (*d*,  $J = 10.8$  Hz), 155.3, 157.3 (*d*,  $J = 13.4$  Hz), 166.0 (*d*,  $J = 255.1$  Hz), 176.9; ESI-HRMS,  $m/z$ : Calcd for  $\text{C}_{11}\text{H}_8\text{F}_3\text{O}_3^+$   $[\text{M}+\text{H}]^+$ : 245.0420, found: 245.0413.

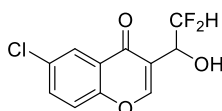

6-Chloro-3-(2,2-difluoro-1-hydroxyethyl)-4*H*-chromen-4-one (**3i**): white solid, 49 mg, 94% yield; m.p. 97-99 °C;  $^1\text{H}$  NMR (400 MHz,  $\text{CDCl}_3$ ),  $\delta$ , ppm: 4.27 (*br*, 1H), 4.76-4.83 (*m*, 1H), 6.04 (*td*,  $J = 55.7, 3.4$  Hz, 1H), 7.33 (*dd*,  $J = 8.6, 1.9$  Hz, 1H), 7.44 (*d*,  $J = 1.9$  Hz, 1H), 7.97 (*s*, 1H), 8.04 (*d*,  $J = 8.6$  Hz, 1H);  $^{19}\text{F}$  NMR (376 MHz,  $\text{CDCl}_3$ ),  $\delta$ , ppm: -127.59 (*d*,  $J = 282.3$  Hz, 1F), -130.87 (*d*,  $J = 281.8$  Hz, 1F);  $^{13}\text{C}$  NMR (100 MHz,  $\text{CDCl}_3$ ),  $\delta$ , ppm: 68.8 (*t*,  $J = 25.0$  Hz), 114.0 (*t*,  $J = 243.0$  Hz), 118.4, 119.2 (*t*,  $J = 3.1$  Hz), 122.1, 126.7, 127.0, 140.7, 155.2, 156.3, 177.0; ESI-HRMS,  $m/z$ : Calcd for  $\text{C}_{11}\text{H}_8\text{ClF}_2\text{O}_3^+$   $[\text{M}+\text{H}]^+$ : 261.0125, found: 261.0147.

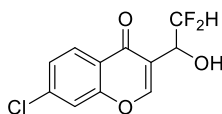

7-Chloro-3-(2,2-difluoro-1-hydroxyethyl)-4*H*-chromen-4-one(**3j**): white solid, 47 mg, 90% yield; m.p. 133-135 °C;  $^1\text{H}$  NMR (400 MHz,  $\text{CDCl}_3$ ),  $\delta$ , ppm: 4.05 (*br*, 1H), 4.80-4.85 (*m*, 1H), 6.12 (*td*,  $J = 55.9, 3.4$  Hz, 1H), 7.49 (*d*,  $J = 9.0$  Hz, 1H), 7.68 (*dd*,  $J = 8.9, 2.5$  Hz, 1H), 8.05 (*s*, 1H), 8.16 (*d*,  $J = 2.4$  Hz, 1H);  $^{19}\text{F}$  NMR (376 MHz,  $\text{CDCl}_3$ ),  $\delta$ , ppm: -127.53 (*d*,  $J = 281.5$  Hz, 1F), -130.69 (*d*,  $J = 282.4$  Hz, 1F);  $^{13}\text{C}$  NMR (100 MHz,  $\text{CDCl}_3$ ),  $\delta$ , ppm: 69.3 (*t*,  $J = 24.5$  Hz), 114.0 (*t*,  $J = 244.3$  Hz), 118.7, 120.1, 124.5, 125.1, 131.8, 134.8, 154.6, 155.1, 176.8; ESI-HRMS,  $m/z$ : Calcd for  $\text{C}_{11}\text{H}_8\text{ClF}_2\text{O}_3^+$   $[\text{M}+\text{H}]^+$ : 261.0125, found: 261.0147.

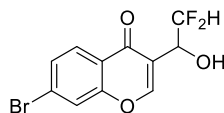

Bromo-3-(2,2-difluoro-1-hydroxyethyl)-4*H*-chromen-4-one (**3k**): white solid, 48 mg, 80% yield; m.p. 113-115 °C; <sup>1</sup>H NMR (400 MHz, CDCl<sub>3</sub>), δ, ppm: 4.85-4.91 (*m*, 1H), 6.02 (*td*, *J* = 55.8, 3.4 Hz, 1H), 7.49 (*dd*, *J* = 8.6, 1.7 Hz, 1H), 7.63 (*d*, *J* = 1.7 Hz, 1H), 7.97 (*d*, *J* = 8.0 Hz, 1H), 8.02 (*s*, 1H); <sup>19</sup>F NMR (376 MHz, CDCl<sub>3</sub>), δ, ppm: -127.60 (*d*, *J* = 282.1 Hz, 1F), -130.75 (*d*, *J* = 281.8 Hz, 1F); <sup>13</sup>C NMR (100 MHz, CDCl<sub>3</sub>), δ, ppm: 69.1 (*t*, *J* = 24.6 Hz), 114.0 (*t*, *J* = 244.9 Hz), 119.1 (*t*, *J* = 3.1 Hz), 121.4, 122.4, 127.0, 128.9, 129.5, 155.0, 156.3, 177.2; ESI-HRMS, *m/z*: Calcd for C<sub>11</sub>H<sub>8</sub>BrF<sub>2</sub>O<sub>3</sub><sup>+</sup> [M+H]<sup>+</sup>: 304.9619, found: 304.9629.

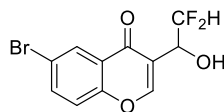

6-Bromo-3-(2,2-difluoro-1-hydroxyethyl)-4*H*-chromen-4-one (**3l**): white solid, 61 mg, 99% yield; m.p. 116-118 °C; <sup>1</sup>H NMR (400 MHz, CDCl<sub>3</sub>), δ, ppm: 4.09 (*br*, 1H), 4.75-4.82 (*m*, 1H), 6.04 (*td*, *J* = 55.6, 3.4 Hz, 1H), 7.34 (*d*, *J* = 9.0 Hz, 1H), 7.73 (*dd*, *J* = 8.9, 2.4 Hz, 1H), 7.99 (*s*, 1H), 8.23 (*d*, *J* = 2.4 Hz, 1H); <sup>19</sup>F NMR (376 MHz, CDCl<sub>3</sub>), δ, ppm: -127.61 (*d*, *J* = 282.0 Hz, 1F), -130.83 (*d*, *J* = 282.3 Hz, 1F); <sup>13</sup>C NMR (100 MHz, CDCl<sub>3</sub>), δ, ppm: 69.0 (*t*, *J* = 24.8 Hz), 114.0 (*t*, *J* = 243.1 Hz), 119.0 (*t*, *J* = 3.3 Hz), 119.3, 120.3, 124.8, 128.3, 137.5, 155.0, 155.2, 176.5; ESI-HRMS, *m/z*: Calcd for C<sub>11</sub>H<sub>8</sub>BrF<sub>2</sub>O<sub>3</sub><sup>+</sup> [M+H]<sup>+</sup>: 304.9619, found: 304.9629.

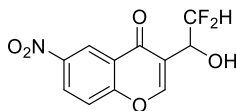

3-(2,2-Difluoro-1-hydroxyethyl)-6-nitro-4*H*-chromen-4-one (**3m**): yellow oil, 27 mg, 50% yield; <sup>1</sup>H NMR (400 MHz, CDCl<sub>3</sub>), δ, ppm: 3.80 (*br*, 1H), 4.87-4.93 (*m*, 1H), 6.07 (*td*, *J* = 55.5, 3.0 Hz, 1H), 7.63 (*d*, *J* = 9.2 Hz, 1H), 8.09 (*s*, 1H), 8.48 (*dd*, *J* = 9.2, 2.8 Hz, 1H), 9.00 (*d*, *J* = 2.8 Hz, 1H); <sup>19</sup>F NMR (376 MHz, CDCl<sub>3</sub>), δ, ppm: -128.17 (*d*, *J* = 282.5 Hz, 1F), -131.53 (*d*, *J* = 282.3 Hz, 1F); <sup>13</sup>C NMR (100 MHz, CDCl<sub>3</sub>), δ, ppm: 67.3 (*t*, *J* = 24.8 Hz), 112.7 (*t*, *J* = 243.3 Hz), 118.8 (*t*, *J* = 3.2 Hz), 119.2, 121.5, 122.6, 127.6, 144.0, 154.5, 157.9, 175.1; ESI-HRMS, *m/z*: Calcd for C<sub>11</sub>H<sub>8</sub>F<sub>2</sub>NO<sub>5</sub><sup>+</sup> [M+H]<sup>+</sup>: 272.0365, found: 272.0371.

## Characterization Data for the Products 4a-4l

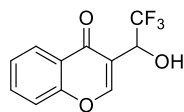

3-(2,2,2-Trifluoro-1-hydroxyethyl)-4*H*-chromen-4-one (**4a**): white solid, 48 mg, 99% yield; m.p. 78-80 °C (82.5-84.0 °C<sup>[4]</sup>); <sup>1</sup>H NMR (400 MHz, CDCl<sub>3</sub>),  $\delta$ , ppm: 5.12-5.26 (*m*, 1H), 5.62 (*d*, *J* = 4.8 Hz, 1H), 7.44-7.51 (*m*, 2H), 7.71-7.76 (*m*, 1H), 8.10 (*s*, 1H), 8.19 (*dd*, *J* = 8.0, 1.6 Hz, 1H).

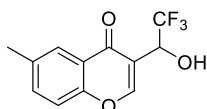

6-Methyl-3-(2,2,2-trifluoro-1-hydroxyethyl)-4*H*-chromen-4-one (**4b**): white solid, 51 mg, 99% yield; m.p. 101-103 °C (98.1-100.4°C<sup>[4]</sup>); <sup>1</sup>H NMR (400 MHz, CDCl<sub>3</sub>),  $\delta$ , ppm: 2.47 (*s*, 3H), 5.02-5.09 (*m*, 1H), 5.61 (*d*, *J* = 8.4 Hz, 1H), 7.41 (*d*, *J* = 8.6 Hz, 1H), 7.55 (*dd*, *J* = 8.6, 2.0 Hz, 1H), 7.99 (*d*, *J* = 0.9 Hz, 1H), 8.02 (*s*, 1H).

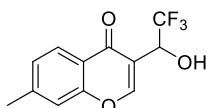

7-Methyl-3-(2,2,2-trifluoro-1-hydroxyethyl)-4*H*-chromen-4-one (**4c**): white solid, 51 mg, 99% yield; m.p. 106-107 °C (101.0-103.0 °C<sup>[4]</sup>); <sup>1</sup>H NMR (400 MHz, CDCl<sub>3</sub>),  $\delta$ , ppm: 2.51 (*s*, 3H), 4.98-5.06 (*m*, 1H), 5.62 (*d*, *J* = 8.6 Hz, 1H), 7.27-7.30 (*m*, 2H), 7.98 (*s*, 1H), 8.09 (*d*, *J* = 8.0 Hz, 1H).

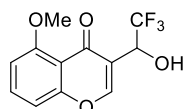

5-Methoxy-3-(2,2,2-trifluoro-1-hydroxyethyl)-4*H*-chromen-4-one (**4d**): white solid, 46 mg, 84% yield; m.p. 115-117 °C; <sup>1</sup>H NMR (400 MHz, CDCl<sub>3</sub>),  $\delta$ , ppm: 3.99 (*s*, 3H), 5.09-5.15 (*m*, 1H), 5.75 (*br*, 1H), 6.85 (*d*, *J* = 8.3 Hz, 1H), 7.02 (*dd*, *J* = 8.5, 0.8 Hz, 1H), 7.58-7.62 (*m*, 1H), 7.91 (*s*, 1H); <sup>19</sup>F NMR (376 MHz, CDCl<sub>3</sub>),  $\delta$ , ppm: -78.40 (*s*, 3F); <sup>13</sup>C NMR (100 MHz, CDCl<sub>3</sub>),  $\delta$ , ppm: 56.5, 67.7 (*q*, *J* = 33.4 Hz), 107.0, 110.1, 114.1, 118.2, 124.4 (*q*, *J* = 281.1 Hz), 134.8, 154.2, 158.0, 159.9, 177.6; ESI-HRMS, *m/z*: Calcd for C<sub>12</sub>H<sub>10</sub>F<sub>3</sub>O<sub>4</sub><sup>+</sup> [M+H]<sup>+</sup>: 275.0526, found:275.0514.

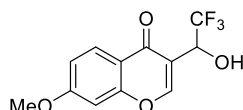

7-Methoxy-3-(2,2,2-trifluoro-1-hydroxyethyl)-4*H*-chromen-4-one (**4e**): white solid, 52 mg, 95% yield; m.p. 122-124 °C (128.6-130.5 °C<sup>[4]</sup>); <sup>1</sup>H NMR (400 MHz, CDCl<sub>3</sub>),  $\delta$ , ppm: 3.92 (*s*, 3H), 5.02-5.06 (*m*, 1H), 5.74 (*d*, *J* = 8.2 Hz, 1H), 6.87 (*d*, *J* = 2.2 Hz, 1H), 7.02 (*dd*, *J* = 9.0, 2.2

Hz, 1H), 7.96 (*s*, 1H), 8.10 (*d*,  $J = 9.0$  Hz, 1H).

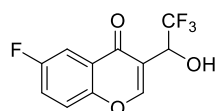

6-Fluoro-3-(2,2,2-trifluoro-1-hydroxyethyl)-4*H*-chromen-4-one (**4f**): white solid, 52 mg, 99% yield; m.p. 111-113 °C (108.3-110.3 °C<sup>[4]</sup>); <sup>1</sup>H NMR (400 MHz, CDCl<sub>3</sub>),  $\delta$ , ppm: 5.17-5.18 (*m*, 1H), 5.28-5.31 (*m*, 1H), 7.45-7.50 (*m*, 1H), 7.55 (*dd*,  $J = 9.2, 4.2$  Hz, 1H), 7.83 (*dd*,  $J = 8.0, 3.0$  Hz, 1H), 8.11 (*s*, 1H).

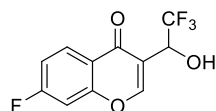

7-Fluoro-3-(2,2,2-trifluoro-1-hydroxyethyl)-4*H*-chromen-4-one (**4g**): white solid, 69 mg, 99% yield; m.p. 99-100 °C (96.4-98.2 °C<sup>[4]</sup>); <sup>1</sup>H NMR (400 MHz, CDCl<sub>3</sub>),  $\delta$ , ppm: 5.06-5.14 (*m*, 1H), 5.27 (*d*,  $J = 8.3$  Hz, 1H), 7.19-7.24 (*m*, 2H), 8.05 (*s*, 1H), 8.25 (*dd*,  $J = 9.6, 6.2$  Hz, 1H).

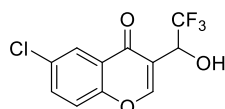

6-Chloro-3-(2,2,2-trifluoro-1-hydroxyethyl)-4*H*-chromen-4-one (**4h**): white solid, 53 mg, 95% yield; m.p. 100-102 °C (102.9-104.5 °C<sup>[4]</sup>); <sup>1</sup>H NMR (400 MHz, CDCl<sub>3</sub>),  $\delta$ , ppm: 5.02-5.15 (*m*, 2H), 7.49 (*d*,  $J = 8.0$  Hz, 1H), 7.79 (*dd*,  $J = 8.0, 2.4$  Hz, 1H), 8.07 (*s*, 1H), 8.18 (*d*,  $J = 2.4$  Hz, 1H).

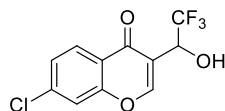

7-Chloro-3-(2,2,2-trifluoro-1-hydroxyethyl)-4*H*-chromen-4-one (**4i**): white solid, 52 mg, 94% yield; m.p. 119-121 °C (115.7-117.0 °C<sup>[4]</sup>); <sup>1</sup>H NMR (400 MHz, CDCl<sub>3</sub>),  $\delta$ , ppm: 5.13-5.19 (*m*, 1H), 5.31 (*d*,  $J = 7.8$  Hz, 1H), 7.43 (*dd*,  $J = 8.6, 1.8$  Hz, 1H), 7.53 (*d*,  $J = 1.8$  Hz, 1H), 8.07 (*s*, 1H), 8.18 (*d*,  $J = 8.6$  Hz, 1H).

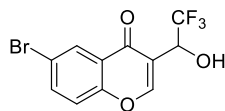

6-Bromo-3-(2,2,2-trifluoro-1-hydroxyethyl)-4*H*-chromen-4-one (**4j**): white solid, 63 mg, 99% yield; m.p. 99-101 °C (97.0-98.4 °C<sup>[4]</sup>); <sup>1</sup>H NMR (400 MHz, CDCl<sub>3</sub>),  $\delta$ , ppm: 5.07-5.35 (*m*, 2H), 7.41 (*d*,  $J = 8.9$  Hz, 1H), 7.81 (*dd*,  $J = 8.9, 2.4$  Hz, 1H), 8.11 (*s*, 1H), 8.30 (*d*,  $J = 2.4$  Hz, 1H).

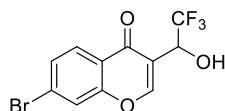

7-Bromo-3-(2,2,2-trifluoro-1-hydroxyethyl)-4*H*-chromen-4-one (**4k**): white solid, 57 mg, 88% yield; m.p. 132-134 °C (128.5-130.5 °C<sup>[4]</sup>); <sup>1</sup>H NMR (400 MHz, CDCl<sub>3</sub>), δ, ppm: 5.14-5.19 (*m*, 1H), 5.30 (*br*, 1H), 7.57 (*dd*, *J* = 8.6, 1.8 Hz, 1H), 7.70 (*d*, *J* = 1.8 Hz, 1H), 8.04-8.06 (*m*, 2H).

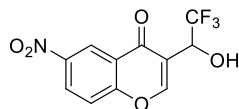

6-Nitro-3-(2,2,2-trifluoro-1-hydroxyethyl)-4*H*-chromen-4-one (**4l**): yellow oil, 40 mg, 65% yield; <sup>1</sup>H NMR (400 MHz, CDCl<sub>3</sub>), δ, ppm: 4.77 (*s*, 1H), 5.18-5.21 (*m*, 1H), 7.64 (*d*, *J* = 9.2 Hz, 1H), 8.13 (*s*, 1H), 8.49 (*dd*, *J* = 9.2, 2.8 Hz, 1H), 8.99 (*d*, *J* = 2.8 Hz, 1H).

### Characterization Data for the Products 5a-5l

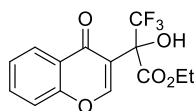

Ethyl 3,3,3-trifluoro-2-hydroxy-2-(4-oxo-4*H*-chromen-3-yl)propanoate (**5a**): white solid, 62 mg, 99% yield; m.p. 77-79 °C (75.1-77.0 °C<sup>[4]</sup>); <sup>1</sup>H NMR (400 MHz, CDCl<sub>3</sub>), δ, ppm: 1.31 (*t*, *J* = 8.0 Hz, 3H), 4.34-4.44 (*m*, 2H), 5.98 (*br*, 1H), 7.46-7.53 (*m*, 2H), 7.73-7.77 (*m*, 1H), 8.19 (*dd*, *J* = 8.0, 1.4 Hz, 1H), 8.32 (*s*, 1H); <sup>19</sup>F NMR (376 MHz, CDCl<sub>3</sub>), δ, ppm: -74.94 (*s*, 3F); <sup>13</sup>C NMR (100 MHz, CDCl<sub>3</sub>), δ, ppm: 13.9, 64.0, 76.3 (*q*, *J* = 30.2 Hz), 118.1, 118.2, 123.0 (*q*, *J* = 285.2 Hz), 123.5, 125.9, 126.1, 134.8, 155.4 (*q*, *J* = 3.4 Hz), 155.9, 167.6, 176.9.

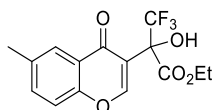

Ethyl 3,3,3-trifluoro-2-hydroxy-2-(6-methyl-4-oxo-4*H*-chromen-3-yl)propanoate (**5b**): white solid, 61 mg, 92% yield; m.p. 79-81 °C (86.4-88.2 °C<sup>[4]</sup>); <sup>1</sup>H NMR (400 MHz, CDCl<sub>3</sub>), δ, ppm: 1.23 (*t*, *J* = 8.0 Hz, 3H), 2.38 (*s*, 3H), 4.25-4.35 (*m*, 2H), 6.07 (*s*, 1H), 7.33 (*d*, *J* = 8.6 Hz, 1H), 7.46 (*dd*, *J* = 8.6, 1.9 Hz, 1H), 7.87 (*s*, 1H), 8.21 (*s*, 1H); <sup>19</sup>F NMR (376 MHz, CDCl<sub>3</sub>), δ, ppm: -75.11 (*s*, 3F); <sup>13</sup>C NMR (100 MHz, CDCl<sub>3</sub>), δ, ppm: 13.8, 21.0, 63.9, 73.4 (*q*, *J* = 30.0 Hz), 117.6, 117.9, 123.0 (*q*, *J* = 285.3 Hz), 123.2, 125.1, 136.1, 136.2, 154.2, 155.3 (*q*, *J* = 3.3 Hz), 167.6, 177.1.

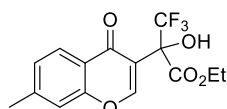

Ethyl 3,3,3-trifluoro-2-hydroxy-2-(7-methyl-4-oxo-4*H*-chromen-3-yl)propanoate (**5c**): white solid, 63 mg, 96% yield; m.p. 83-84 °C (86.6-87.9 °C<sup>[4]</sup>); <sup>1</sup>H NMR (400 MHz, CDCl<sub>3</sub>), δ, ppm: 1.22 (*t*, *J* = 8.0 Hz, 3H), 2.42 (*s*, 3H), 4.25-4.35 (*m*, 2H), 6.12 (*br*, 1H), 7.17-7.22 (*m*, 2H), 7.97 (*d*, *J* = 8.0 Hz, 1H), 8.19 (*s*, 1H); <sup>19</sup>F NMR (376 MHz, CDCl<sub>3</sub>), δ, ppm: -75.15 (*s*,

3F);  $^{13}\text{C}$  NMR (100 MHz,  $\text{CDCl}_3$ ),  $\delta$ , ppm: 13.8, 21.9, 63.8, 73.4 ( $q$ ,  $J = 30.0$  Hz), 117.6, 117.8, 121.2, 123.0 ( $q$ ,  $J = 285.2$  Hz), 125.5, 127.6, 146.5, 155.2 ( $q$ ,  $J = 3.5$  Hz), 156.0, 167.6, 177.0.

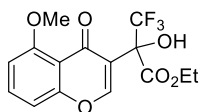

Ethyl 3,3,3-trifluoro-2-hydroxy-2-(5-methoxy-4-oxo-4H-chromen-3-yl)propanoate (**5d**): white solid, 69 mg, 99% yield; m.p. 86-89 °C;  $^1\text{H}$  NMR (400 MHz,  $\text{CDCl}_3$ ),  $\delta$ , ppm: 1.30 ( $t$ ,  $J = 8.0$  Hz, 3H), 3.97 ( $s$ , 3H), 4.31-4.44 ( $m$ , 2H), 5.87 ( $br$ , 1H), 6.85 ( $d$ ,  $J = 8.4$  Hz, 1H), 7.05 ( $d$ ,  $J = 8.4$  Hz, 1H), 7.62 ( $t$ ,  $J = 8.0$  Hz, 1H), 8.13 ( $s$ , 1H);  $^{19}\text{F}$  NMR (376 MHz,  $\text{CDCl}_3$ ),  $\delta$ , ppm: -74.69 ( $s$ , 3F);  $^{13}\text{C}$  NMR (100 MHz,  $\text{CDCl}_3$ ),  $\delta$ , ppm: 13.9, 56.5, 63.8, 76.5 ( $q$ ,  $J = 30.0$  Hz), 107.0, 109.9, 114.1, 119.4, 123.0 ( $q$ ,  $J = 285.2$  Hz), 135.0, 153.2 ( $q$ ,  $J = 3.7$  Hz), 157.8, 160.0, 167.5, 176.6; ESI-HRMS,  $m/z$ : Calcd for  $\text{C}_{15}\text{H}_{14}\text{F}_3\text{O}_6^+$  [ $\text{M}+\text{H}$ ] $^+$ : 347.0737, found: 347.0732.

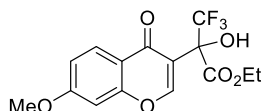

Ethyl 3,3,3-trifluoro-2-hydroxy-2-(7-methoxy-4-oxo-4H-chromen-3-yl)propanoate (**5e**): white solid, 57 mg, 82% yield; m.p. 107-109 °C (106.8-108.1 °C<sup>[4]</sup>);  $^1\text{H}$  NMR (400 MHz,  $\text{CDCl}_3$ ),  $\delta$ , ppm: 1.31 ( $t$ ,  $J = 8.0$  Hz, 3H), 3.93 ( $s$ , 3H), 4.33-4.42 ( $m$ , 2H), 6.34 ( $s$ , 1H), 6.88 ( $d$ ,  $J = 2.4$  Hz, 1H), 7.02 ( $dd$ ,  $J = 9.0, 2.4$  Hz, 1H), 8.08 ( $d$ ,  $J = 9.0$  Hz, 1H), 8.24 ( $s$ , 1H);  $^{19}\text{F}$  NMR (376 MHz,  $\text{CDCl}_3$ ),  $\delta$ , ppm: -75.26 ( $s$ , 3F);  $^{13}\text{C}$  NMR (100 MHz,  $\text{CDCl}_3$ ),  $\delta$ , ppm: 13.9, 56.0, 63.8, 76.5 ( $q$ ,  $J = 30.0$  Hz), 100.1, 115.6, 117.3, 117.4, 123.0 ( $q$ ,  $J = 285.2$  Hz), 127.2, 154.9 ( $q$ ,  $J = 3.4$  Hz), 157.8, 164.9, 167.6, 176.4.

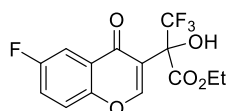

Ethyl 3,3,3-trifluoro-2-(6-fluoro-4-oxo-4H-chromen-3-yl)-2-hydroxypropanoate (**5f**): white solid, 66 mg, 99% yield; m.p. 90-92 °C (90.3-91.6 °C<sup>[4]</sup>);  $^1\text{H}$  NMR (400 MHz,  $\text{CDCl}_3$ ),  $\delta$ , ppm: 1.31 ( $t$ ,  $J = 8.0$  Hz, 3H), 4.35-4.43 ( $m$ , 2H), 5.69 ( $s$ , 1H), 7.45-7.50 ( $m$ , 1H), 7.55 ( $dd$ ,  $J = 9.2, 4.2$  Hz, 1H), 7.81 ( $dd$ ,  $J = 8.0, 3.0$  Hz, 1H), 8.32 ( $s$ , 1H);  $^{19}\text{F}$  NMR (376 MHz,  $\text{CDCl}_3$ ),  $\delta$ , ppm: -74.72 ( $s$ , 3F), -113.33 ( $s$ , 1F);  $^{13}\text{C}$  NMR (100 MHz,  $\text{CDCl}_3$ ),  $\delta$ , ppm: 13.8, 64.1, 76.1 ( $q$ ,  $J = 30.3$  Hz), 110.8 ( $d$ ,  $J = 23.8$  Hz), 117.9, 120.5 ( $d$ ,  $J = 8.2$  Hz), 122.9 ( $q$ ,  $J = 285.3$  Hz), 123.1 ( $d$ ,  $J = 25.3$  Hz), 124.7 ( $d$ ,  $J = 7.6$  Hz), 152.1 ( $d$ ,  $J = 1.3$  Hz), 155.4 ( $q$ ,  $J = 3.6$  Hz), 159.9 ( $d$ ,  $J = 247.0$  Hz), 167.5, 176.0 ( $d$ ,  $J = 2.3$  Hz).

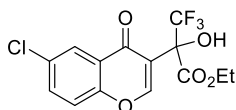

Ethyl 2-(6-chloro-4-oxo-4H-chromen-3-yl)-3,3,3-trifluoro-2-hydroxypropanoate (**5g**): white solid, 64 mg, 92% yield; m.p. 119-121 °C (111.5-112.6 °C<sup>[4]</sup>);  $^1\text{H}$  NMR (400 MHz,



CDCl<sub>3</sub>),  $\delta$ , ppm: 1.31 (*t*,  $J = 8.0$  Hz, 3H), 4.34-4.42 (*m*, 2H), 5.63 (*br*, 1H), 7.49 (*d*,  $J = 8.9$  Hz, 1H), 7.68 (*dd*,  $J = 9.0, 2.6$  Hz, 1H), 8.13 (*d*,  $J = 2.6$  Hz, 1H), 8.30 (*s*, 1H); <sup>19</sup>F NMR (376 MHz, CDCl<sub>3</sub>),  $\delta$ , ppm: -74.66 (*s*, 3F); <sup>13</sup>C NMR (100 MHz, CDCl<sub>3</sub>),  $\delta$ , ppm: 13.8, 64.1, 75.9 (*q*,  $J = 30.3$  Hz), 118.6, 120.0, 122.9 (*q*,  $J = 285.3$  Hz), 124.4, 125.3, 132.1, 135.0, 154.2, 155.4 (*q*,  $J = 3.5$  Hz), 167.5, 175.5.

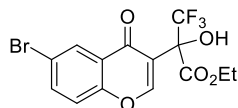

Ethyl 2-(6-bromo-4-oxo-4*H*-chromen-3-yl)-3,3,3-trifluoro-2-hydroxypropanoate (**5h**): white solid, 69 mg, 88% yield; m.p. 127-128 °C (124.6-125.8 °C<sup>[4]</sup>); <sup>1</sup>H NMR (400 MHz, CDCl<sub>3</sub>),  $\delta$ , ppm: 1.31 (*t*,  $J = 8.0$  Hz, 3H), 4.33-4.44 (*m*, 2H), 5.60 (*s*, 1H), 7.43 (*d*,  $J = 8.8$  Hz, 1H), 7.82 (*dd*,  $J = 8.9, 2.4$  Hz, 1H), 8.30 (*s*, 2H); <sup>19</sup>F NMR (376 MHz, CDCl<sub>3</sub>),  $\delta$ , ppm: -74.64 (*s*, 3F); <sup>13</sup>C NMR (100 MHz, CDCl<sub>3</sub>),  $\delta$ , ppm: 13.8, 64.1, 76.0 (*q*,  $J = 30.0$  Hz), 118.8, 119.5, 120.2, 122.9 (*q*,  $J = 285.3$  Hz), 124.8, 128.5, 137.8, 154.6, 155.4 (*q*,  $J = 3.6$  Hz), 167.5, 175.3.

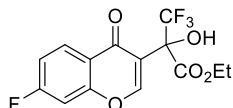

Ethyl 3,3,3-trifluoro-2-(7-fluoro-4-oxo-4*H*-chromen-3-yl)-2-hydroxypropanoate (**5i**): white solid, 64 mg, 99% yield; m.p. 85-87 °C (80.7-82.2 °C<sup>[4]</sup>); <sup>1</sup>H NMR (400 MHz, CDCl<sub>3</sub>),  $\delta$ , ppm: 1.22 (*t*,  $J = 8.0$  Hz, 3H), 4.26-4.35 (*m*, 2H), 5.68 (*s*, 1H), 7.10-7.14 (*m*, 2H), 8.11-8.15 (*m*, 1H), 8.20 (*s*, 1H); <sup>19</sup>F NMR (376 MHz, CDCl<sub>3</sub>)  $\delta$  -74.82 (*s*, 3F), -100.38 (*s*, 1F); <sup>13</sup>C NMR (100 MHz, CDCl<sub>3</sub>),  $\delta$ , ppm: 13.8, 64.0, 76.0 (*q*,  $J = 30.0$  Hz), 104.9 (*d*,  $J = 25.4$  Hz), 115.0 (*d*,  $J = 27.3$  Hz), 118.6, 120.4 (*d*,  $J = 2.1$  Hz), 122.9 (*q*,  $J = 285.4$  Hz), 128.6 (*d*,  $J = 10.7$  Hz), 155.4 (*q*,  $J = 3.1$  Hz), 156.9 (*d*,  $J = 13.6$  Hz), 166.1 (*d*,  $J = 255.8$  Hz), 167.5, 175.8.

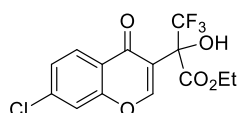

Ethyl 2-(7-chloro-4-oxo-4*H*-chromen-3-yl)-3,3,3-trifluoro-2-hydroxypropanoate (**5j**): white solid, 62 mg, 89% yield; m.p. 104-106 °C (103.6-106.1 °C<sup>[4]</sup>); <sup>1</sup>H NMR (400 MHz, CDCl<sub>3</sub>),  $\delta$ , ppm: 1.30 (*t*,  $J = 8.0$  Hz, 3H), 4.34-4.44 (*m*, 2H), 5.68 (*s*, 1H), 7.42 (*dd*,  $J = 8.6, 1.9$  Hz, 1H), 7.54 (*d*,  $J = 1.8$  Hz, 1H), 8.11 (*d*,  $J = 8.6$  Hz, 1H), 8.27 (*s*, 1H); <sup>19</sup>F NMR (376 MHz, CDCl<sub>3</sub>),  $\delta$ , ppm: -74.71 (*s*, 3F); <sup>13</sup>C NMR (100 MHz, CDCl<sub>3</sub>),  $\delta$ , ppm: 13.8, 64.1, 76.0 (*q*,  $J = 30.3$  Hz), 118.3, 118.8, 122.0, 122.9 (*q*,  $J = 285.3$  Hz), 127.0, 127.3, 141.0, 155.3 (*q*,  $J = 3.6$  Hz), 155.9, 167.5, 175.9.

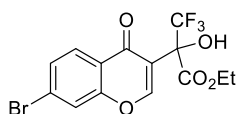

Ethyl 2-(7-bromo-4-oxo-4*H*-chromen-3-yl)-3,3,3-trifluoro-2-hydroxypropanoate (**5k**):

white solid, 77 mg, 97% yield; m.p. 106-108 °C (114.4-115.9 °C<sup>[4]</sup>); <sup>1</sup>H NMR (400 MHz, CDCl<sub>3</sub>), δ, ppm: 1.30 (*t*, *J* = 8.0 Hz, 3H), 4.33-4.44 (*m*, 2H), 5.66 (*br*, 1H), 7.58 (*dd*, *J* = 8.6, 1.8 Hz, 1H), 7.71 (*d*, *J* = 1.7 Hz, 1H), 8.03 (*d*, *J* = 8.6 Hz, 1H), 8.27 (*s*, 1H); <sup>19</sup>F NMR(376 MHz, CDCl<sub>3</sub>), δ, ppm: -74.69 (*s*, 3F); <sup>13</sup>C NMR (100 MHz, CDCl<sub>3</sub>), δ, ppm: 13.8, 64.1, 76.0 (*q*, *J* = 30.4 Hz), 118.8, 121.3, 122.4, 122.9 (*q*, *J* = 285.3 Hz), 127.3, 129.2, 129.7, 155.2 (*q*, *J* = 3.6 Hz), 155.8, 167.5, 176.0.

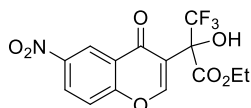

Ethyl 3,3,3-trifluoro-2-hydroxy-2-(6-nitro-4-oxo-4*H*-chromen-3-yl)-propanoate (**5l**): yellow solid, 51.0 mg, 71% yield; m.p. 129-131 °C (124.6-126.1 °C<sup>[4]</sup>); <sup>1</sup>H NMR (400 MHz, CDCl<sub>3</sub>), δ, ppm: 1.31 (*t*, *J* = 8.0 Hz, 3H), 4.36-4.45 (*m*, 2H), 5.24 (*s*, 1H), 7.72 (*d*, *J* = 9.2 Hz, 1H), 8.35 (*d*, *J* = 0.6 Hz, 1H), 8.59 (*dd*, *J* = 9.2, 2.8 Hz, 1H), 9.06 (*d*, *J* = 2.8 Hz, 1H); <sup>19</sup>F NMR (376 MHz, CDCl<sub>3</sub>), δ, ppm: -74.29 (*s*, 3F); <sup>13</sup>C NMR (100 MHz, CDCl<sub>3</sub>), δ, ppm: 13.8, 64.4, 76.0 (*q*, *J* = 30.6 Hz), 119.9, 120.2, 122.68, 122.73 (*q*, *J* = 285.3 Hz), 123.7, 128.9, 145.2, 155.6 (*q*, *J* = 3.8 Hz), 158.6, 167.3, 174.9.

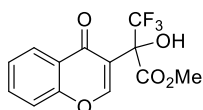

Methyl 3,3,3-trifluoro-2-hydroxy-2-(4-oxo-4*H*-chromen-3-yl)propanoate (**5b**): white solid, 51 mg, 85% yield; m.p. 83-85 °C (78.5-79.9 °C<sup>[4]</sup>); <sup>1</sup>H NMR (400 MHz, CDCl<sub>3</sub>), δ, ppm: 3.92 (*s*, 3H), 6.12 (*s*, 1H), 7.45-7.53 (*m*, 2H), 7.73-7.78 (*m*, 1H), 8.19 (*dd*, *J* = 8.0, 1.6 Hz, 1H), 8.32 (*d*, *J* = 1.6 Hz, 1H); <sup>19</sup>F NMR(376 MHz, CDCl<sub>3</sub>), δ, ppm: -75.21 (*s*, 3F); <sup>13</sup>C NMR (100 MHz, CDCl<sub>3</sub>), δ, ppm: 54.4, 76.4 (*q*, *J* = 30.5 Hz), 117.8, 118.2, 123.0 (*q*, *J* = 285.3 Hz), 123.5, 125.9, 126.1, 134.9, 155.5 (*q*, *J* = 3.4 Hz), 155.9, 168.2, 177.1.

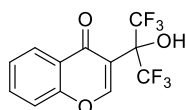

3-(1,1,1,3,3,3-Hexafluoro-2-hydroxypropan-2-yl)-4*H*-chromen-4-one (**5n**): white solid, 40 mg, 64% yield; m.p. 106-108 °C (99.6-101.6 °C<sup>[4]</sup>); <sup>1</sup>H NMR (400 MHz, CDCl<sub>3</sub>), δ, ppm: 7.46-7.52 (*m*, 2H), 7.75-7.79 (*m*, 1H), 8.18 (*dd*, *J* = 8.0, 1.6 Hz, 1H), 8.25 (*s*, 1H), 9.91 (*s*, 1H).

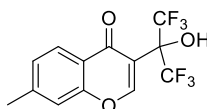

3-(1,1,1,3,3,3-Hexafluoro-2-hydroxypropan-2-yl)-7-methyl-4*H*-chromen-4-one (**5o**):

white solid, 40 mg, 62% yield; m.p. 95-97 °C; <sup>1</sup>H NMR (400 MHz, CDCl<sub>3</sub>), δ, ppm: 2.50 (*s*, 3H), 7.47 (*d*, *J* = 8.8 Hz, 1H), 7.63 (*dd*, *J* = 8.8, 2.4 Hz, 2H), 8.02 (*m*, 1H), 8.29 (*s*, 1H), 10.08 (*s*, 1H); <sup>19</sup>F NMR (376 MHz, CDCl<sub>3</sub>), δ, ppm: -77.28 (*s*, 6F); <sup>13</sup>C NMR (100 MHz, CDCl<sub>3</sub>), δ, ppm: 21.1, 78.14 (*q*, *J* = 31.0 Hz), 110.1, 118.0, 122.46 (*q*, *J* = 287.0 Hz), 122.82, 125.08, 137.0, 137.2, 154.0, 156.5-156.7 (*m*), 180.5; ESI-HRMS, *m/z*: Calcd for C<sub>13</sub>H<sub>9</sub>F<sub>6</sub>O<sub>3</sub><sup>+</sup> [M+H]<sup>+</sup>: 327.0450, found: 327.0435.

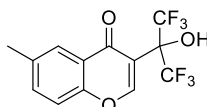

3-(1,1,1,3,3,3-Hexafluoro-2-hydroxypropan-2-yl)-6-methyl-4*H*-chromen-4-one (**5p**): white solid, 36 mg, 52% yield; m.p. 97-99 °C; <sup>1</sup>H NMR (400 MHz, CDCl<sub>3</sub>), δ, ppm: 2.55 (*s*, 3H), 7.34-7.36 (*m*, 2H), 8.12 (*d*, *J* = 8.2 Hz, 1H), 8.27 (*s*, 1H), 10.11 (*s*, 1H); <sup>19</sup>F NMR (376 MHz, CDCl<sub>3</sub>), δ, ppm: -77.30 (*s*, 6F); <sup>13</sup>C NMR (100 MHz, CDCl<sub>3</sub>), δ, ppm: 22.1, 78.14 (*q*, *J* = 31.0 Hz), 110.1, 117.9, 120.9, 122.46 (*q*, *J* = 287.0 Hz), 125.6, 128.4, 147.7, 155.8, 156.4-156.6 (*m*), 180.3; ESI-HRMS, *m/z*: Calcd for C<sub>13</sub>H<sub>9</sub>F<sub>6</sub>O<sub>3</sub><sup>+</sup> [M+H]<sup>+</sup>: 327.0450, found: 327.0435.

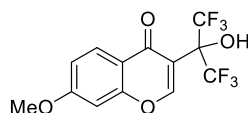

3-(1,1,1,3,3,3-Hexafluoro-2-hydroxypropan-2-yl)-7-methoxy-4*H*-chromen-4-one (**5q**): white solid, 35 mg, 51% yield; m.p. 114-116 °C; <sup>1</sup>H NMR (400 MHz, CDCl<sub>3</sub>), δ, ppm: 3.95 (*s*, 3H), 7.09 (*dd*, *J* = 9.2, 2.4 Hz, 1H), 7.27 (*s*, 1H), 8.13 (*d*, *J* = 9.2 Hz, 1H), 8.22 (*s*, 1H), 10.24 (*s*, 1H); <sup>19</sup>F NMR (376 MHz, CDCl<sub>3</sub>), δ, ppm: -77.33 (*s*, 6F); <sup>13</sup>C NMR (100 MHz, CDCl<sub>3</sub>), δ, ppm: 56.2, 78.14 (*q*, *J* = 31.0 Hz), 100.0, 110.0, 116.5, 116.8, 122.47 (*q*, *J* = 285.0 Hz), 127.3, 156.0-156.2 (*m*), 157.6, 165.7, 179.6; ESI-HRMS, *m/z*: Calcd for C<sub>13</sub>H<sub>9</sub>F<sub>6</sub>O<sub>4</sub><sup>+</sup> [M+H]<sup>+</sup>: 343.0400, found: 343.0403.

### Characterization Data for the Products 6a-6d.

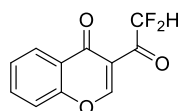

3-(2,2-Difluoroacetyl)-4*H*-chromen-4-one (**6a**): white solid, 14 mg, 62% yield; m.p. 160-161 °C (165-166 °C<sup>[5]</sup>); <sup>1</sup>H NMR (400 MHz, CD<sub>3</sub>OD), δ, ppm: 6.10-6.39 (*m*, 1H), 7.49-7.53 (*m*, 1H), 7.63 (*d*, *J* = 8.0 Hz, 1H), 7.80-7.84 (*m*, 1H), 8.16 (*dd*, *J* = 8.0, 1.5 Hz, 1H), 8.46 (*s*, 1H); <sup>19</sup>F NMR (376 MHz, CD<sub>3</sub>OD), δ, ppm: -131.66 (*d*, *J* = 282.2 Hz, 1F), -140.75 (*d*, *J* = 281.7 Hz, 1F); <sup>13</sup>C NMR (100 MHz, CD<sub>3</sub>OD), δ, ppm: 113.23, 113.27 (*t*, *J* = 243.0 Hz), 117.7, 118.2, 123.5, 125.1, 125.8, 134.6, 156.4, 158.8, 177.1.

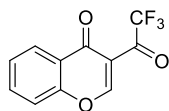

3-(2,2,2-Trifluoroacetyl)-4*H*-chromen-4-one (**6b**): white solid, 12 mg, 50% yield; m.p. 148-149 °C (145 °C<sup>[6]</sup>); <sup>1</sup>H NMR (400 MHz, CD<sub>3</sub>OD),  $\delta$ , ppm: 7.53-7.57 (*m*, 1H), 7.66 (*d*, *J* = 8.4 Hz, 1H), 7.84-7.88 (*m*, 1H), 8.19 (*dd*, *J* = 8.4, 1.6 Hz, 1H), 8.49 (*s*, 1H); <sup>19</sup>F NMR (376 MHz, CD<sub>3</sub>OD),  $\delta$ , ppm: -86.51 (*s*, 3F); <sup>13</sup>C NMR (100 MHz, DMSO-*d*<sub>6</sub>),  $\delta$ , ppm: 92.6 (*q*, *J* = 33.0 Hz), 119.0, 119.1, 123.3, 123.7 (*q*, *J* = 287.7 Hz), 125.6, 127.0, 135.9, 156.2, 159.8, 177.8.

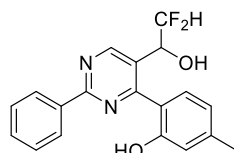

2-(5-(2,2-Difluoro-1-hydroxyethyl)-2-phenylpyrimidin-4-yl)-5-methylphenol (**6c**): yellow solid, 63 mg, 92% yield; m.p. 68-70 °C; <sup>1</sup>H NMR (400 MHz, CD<sub>3</sub>OD),  $\delta$ , ppm: 2.34 (*s*, 3H), 5.01-5.07 (*m*, 1H), 5.92 (*td*, *J* = 55.3, 2.4 Hz, 1H), 6.80 (*s*, 1H), 6.83 (*d*, *J* = 7.8 Hz, 1H), 7.26 (*d*, *J* = 7.8 Hz, 1H), 7.45-7.47 (*m*, 3H), 8.38-8.41 (*m*, 1H), 9.03 (*s*, 1H); <sup>19</sup>F NMR (376 MHz, CD<sub>3</sub>OD),  $\delta$ , ppm: -128.88 (*d*, *J* = 282.3 Hz, 1F), -132.73 (*d*, *J* = 282.2 Hz, 1F); <sup>13</sup>C NMR (100 MHz, CD<sub>3</sub>OD),  $\delta$ , ppm: 20.1, 68.1 (*t*, *J* = 22.7 Hz), 115.5 (*t*, *J* = 243.3 Hz), 116.0, 120.6, 121.6, 127.9, 128.0, 128.3, 130.59, 130.62, 137.1, 141.6, 154.0, 157.1, 163.8, 164.5; ESI-HRMS, *m/z*: Calcd for C<sub>19</sub>H<sub>17</sub>F<sub>2</sub>N<sub>2</sub>O<sub>2</sub><sup>+</sup> [M+H]<sup>+</sup>: 343.1253, found: 343.1236.

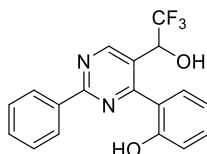

2-(2-Phenyl-5-(2,2,2-trifluoro-1-hydroxyethyl) pyrimidin-4-yl) phenol (**6d**): yellow oil<sup>[4]</sup>, 62 mg, 90% yield; <sup>1</sup>H NMR (400 MHz, CD<sub>3</sub>OD),  $\delta$ , ppm: 5.33 (*q*, *J* = 6.8 Hz, 1H), 6.97-7.03 (*m*, 2H), 7.34-7.37 (*m*, 2H), 7.46-7.48 (*m*, 3H), 7.41-7.44 (*m*, 2H), 9.09 (*s*, 1H).

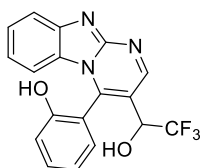

2-(3-(2,2,2-Trifluoro-1-hydroxyethyl)benzo[4,5]imidazo[1,2-a]pyrimidin-4-yl)phenol (**6e**): yellow solid, 30 mg, 42% yield; m.p. 91-93 °C; <sup>1</sup>H NMR (400 MHz, CDCl<sub>3</sub>),  $\delta$ , ppm: 4.98-5.03 (*m*, 1H), 6.22 (*d*, *J* = 8.0 Hz, 1H), 6.92-6.96 (*m*, 1H), 7.05-7.09 (*m*, 2H), 7.15 (*d*, *J* = 6.8 Hz, 1H), 7.24-7.28 (*m*, 1H), 7.44-7.54 (*m*, 2H); <sup>19</sup>F NMR (376 MHz, CDCl<sub>3</sub>),  $\delta$ , ppm: -77.02; <sup>13</sup>C NMR (100 MHz, CDCl<sub>3</sub>),  $\delta$ , ppm: 65.16 (*q*, *J* = 32.0 Hz), 113.3, 115.53, 116.47, 118.37, 118.68, 119.97, 121.48, 124.18 (*q*, *J* = 246.0 Hz), 125.30, 126.67, 129.28, 132.22, 142.56, 146.28, 149.16, 154.08, 154.95; ESI-HRMS, *m/z*: Calcd for C<sub>18</sub>H<sub>13</sub>F<sub>3</sub>N<sub>3</sub>O<sub>2</sub><sup>+</sup> [M+H]<sup>+</sup>:

360.0954, found: 360.0941.

## Data of Single-crystal X-ray Analysis

**Table S1.** Crystal data and structure refinement for **3k**

| Compound                                                  | <b>3k</b>                                                      |
|-----------------------------------------------------------|----------------------------------------------------------------|
| Empirical formula                                         | C <sub>11</sub> H <sub>7</sub> BrF <sub>2</sub> O <sub>3</sub> |
| Formula weight                                            | 305.08                                                         |
| Crystal system                                            | Monoclinic                                                     |
| Space group                                               | <i>P2<sub>1</sub>/c</i>                                        |
| <i>a</i> (Å)                                              | 11.4857(15)                                                    |
| <i>b</i> (Å)                                              | 9.7788(14)                                                     |
| <i>c</i> (Å)                                              | 9.6329(11)                                                     |
| $\alpha$ (°)                                              | 90.00                                                          |
| $\beta$ (°)                                               | 101.874(12)                                                    |
| $\gamma$ (°)                                              | 90.00                                                          |
| Volume(Å <sup>3</sup> )                                   | 1058.8(2)                                                      |
| <i>Z</i>                                                  | 4                                                              |
| <i>D</i> <sub>calc</sub> (g cm <sup>-3</sup> )            | 1.914                                                          |
| <i>F</i> (000)                                            | 600.0                                                          |
| Reflections collected                                     | 3446                                                           |
| Independent reflections                                   | 1976                                                           |
| <i>R</i> <sub>int</sub>                                   | 0.052                                                          |
| Goodness-of-fit<br>on <i>F</i> <sup>2</sup>               | 1.017                                                          |
| <i>R</i> <sub>1</sub> , <i>wR</i> <sub>2</sub>            | 0.0679, 0.1727                                                 |
| [ <i>I</i> ≥ 2σ( <i>I</i> )]                              |                                                                |
| <i>R</i> <sub>1</sub> , <i>wR</i> <sub>2</sub> [all data] | 0.0867, 0.2021                                                 |

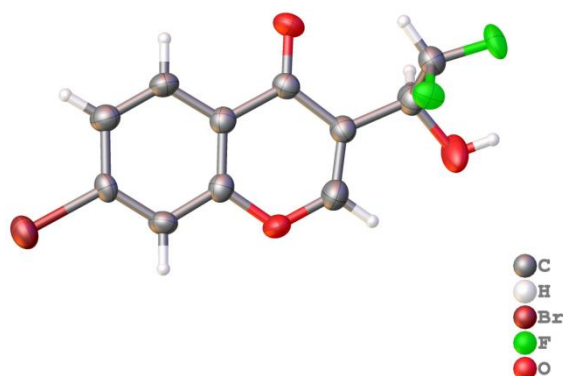

**Fig. S1.** The molecular structure of **3k**

# NMR Spectra for All Compounds 3a-3m, 4a- 4l, 5a-5q and 6a-6e.

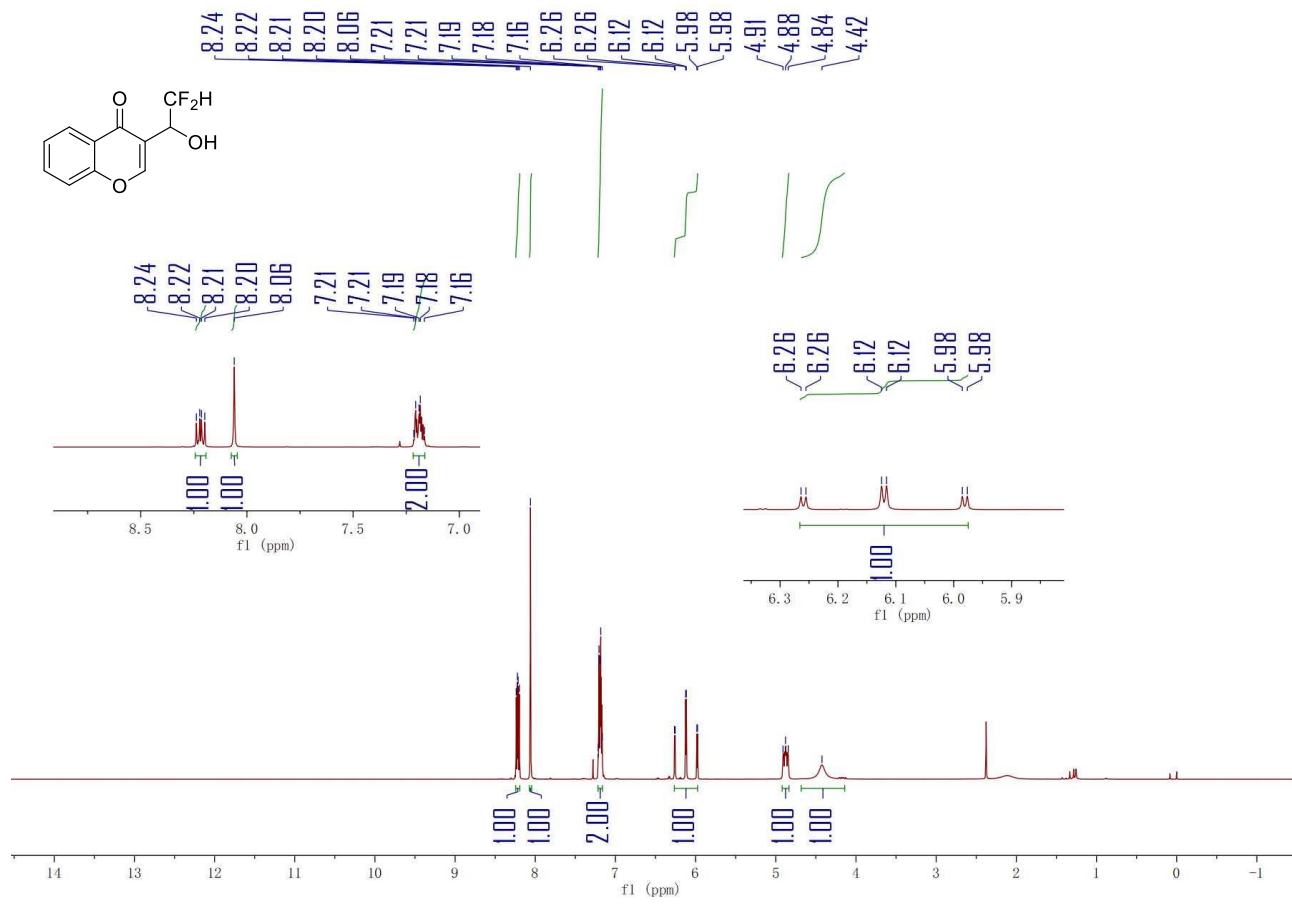

Fig. S2. <sup>1</sup>H NMR spectrum of compound 3a

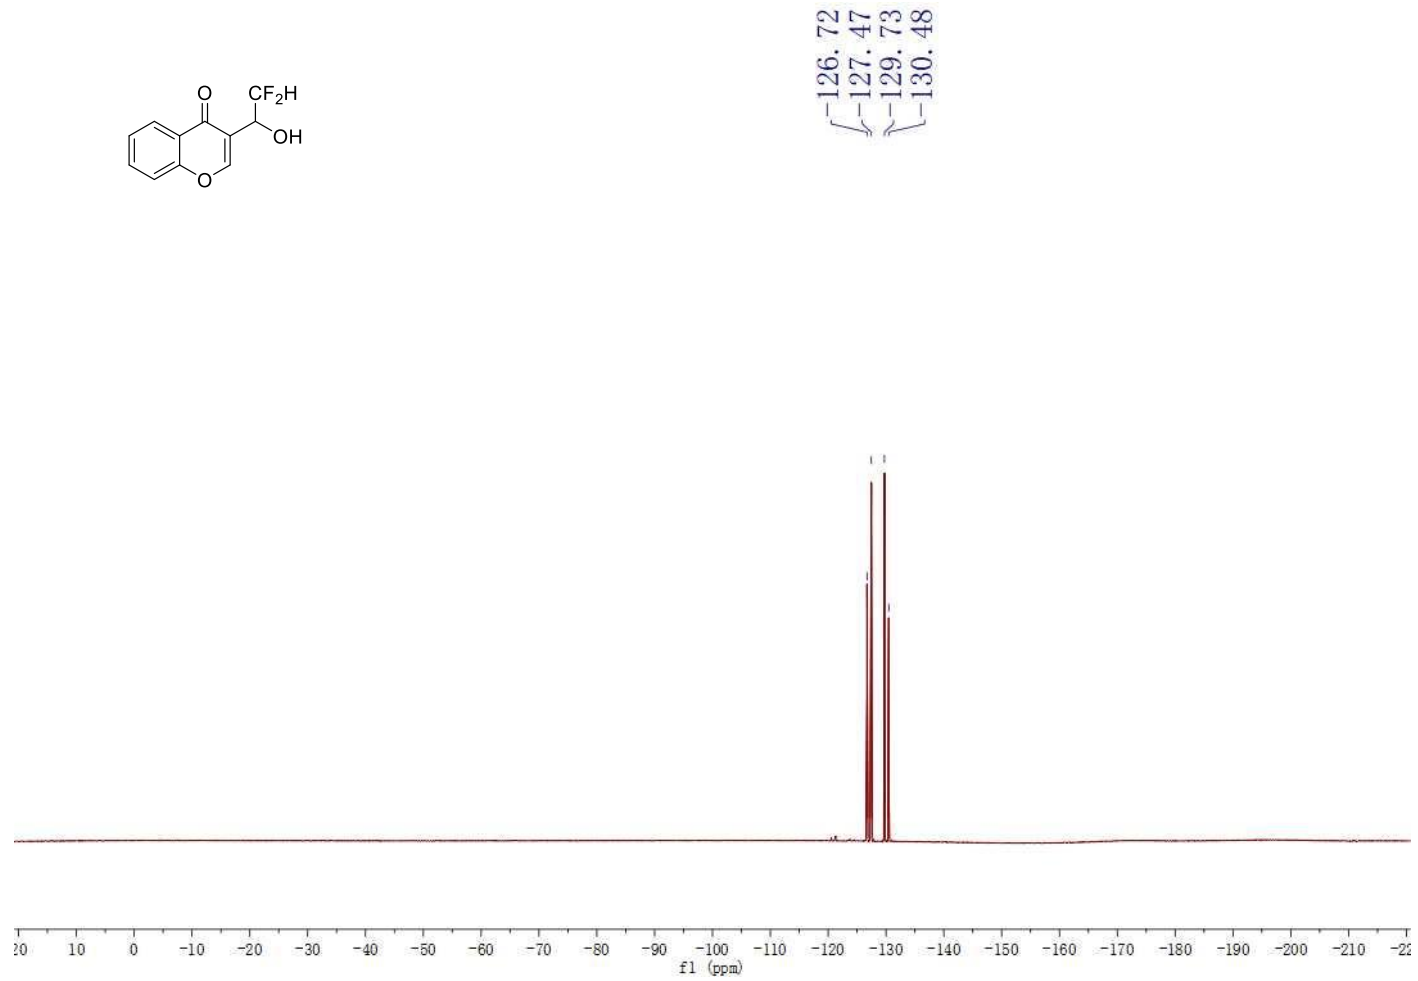

**Fig. S3.**  $^{19}\text{F}$  NMR spectrum of compound 3a



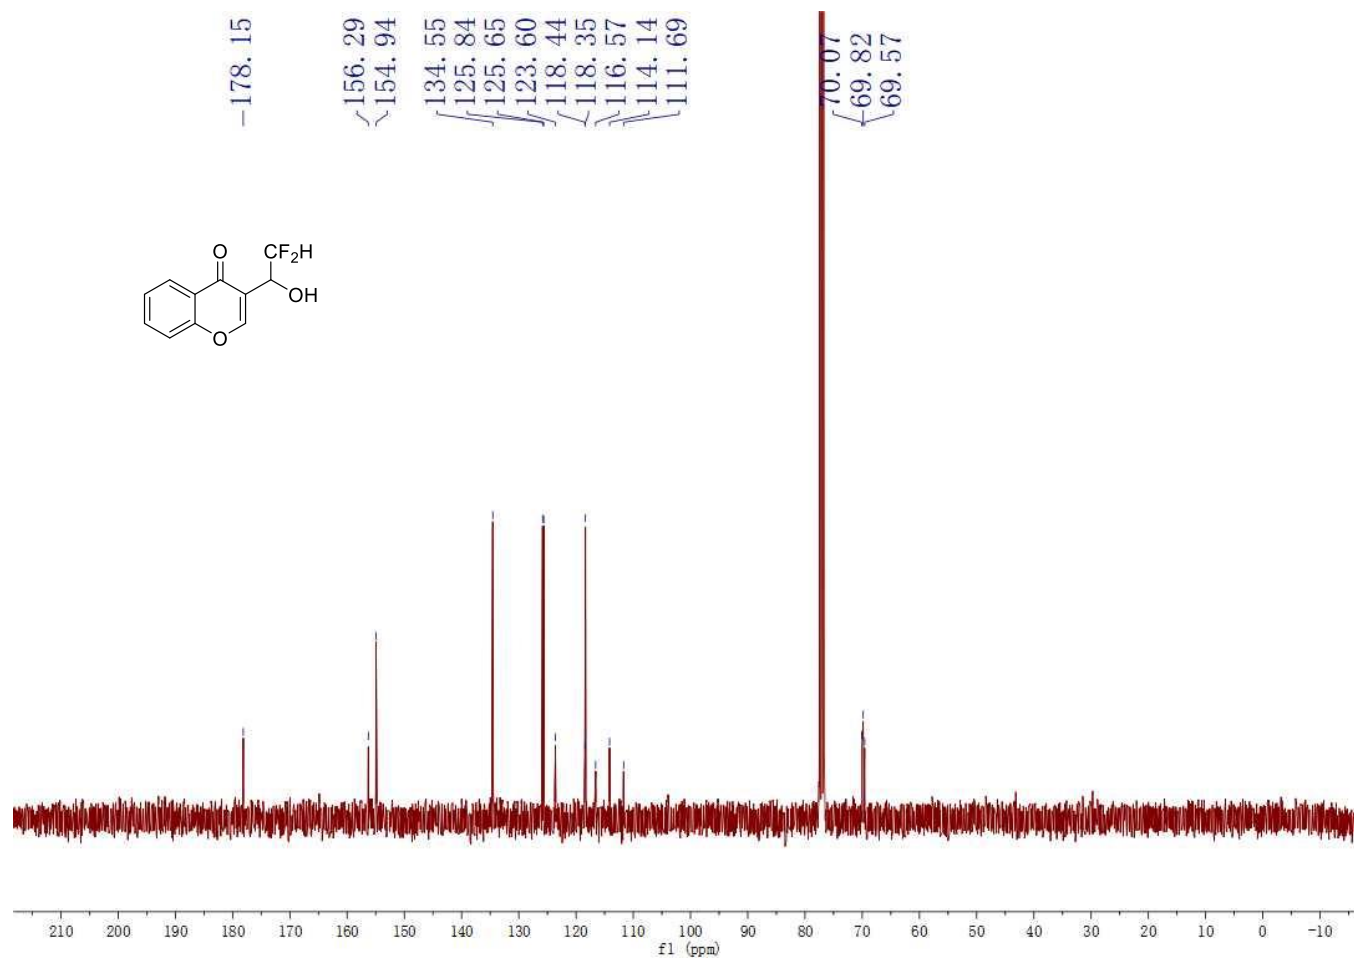

**Fig. S4.** <sup>13</sup>C NMR spectrum of compound **3a**

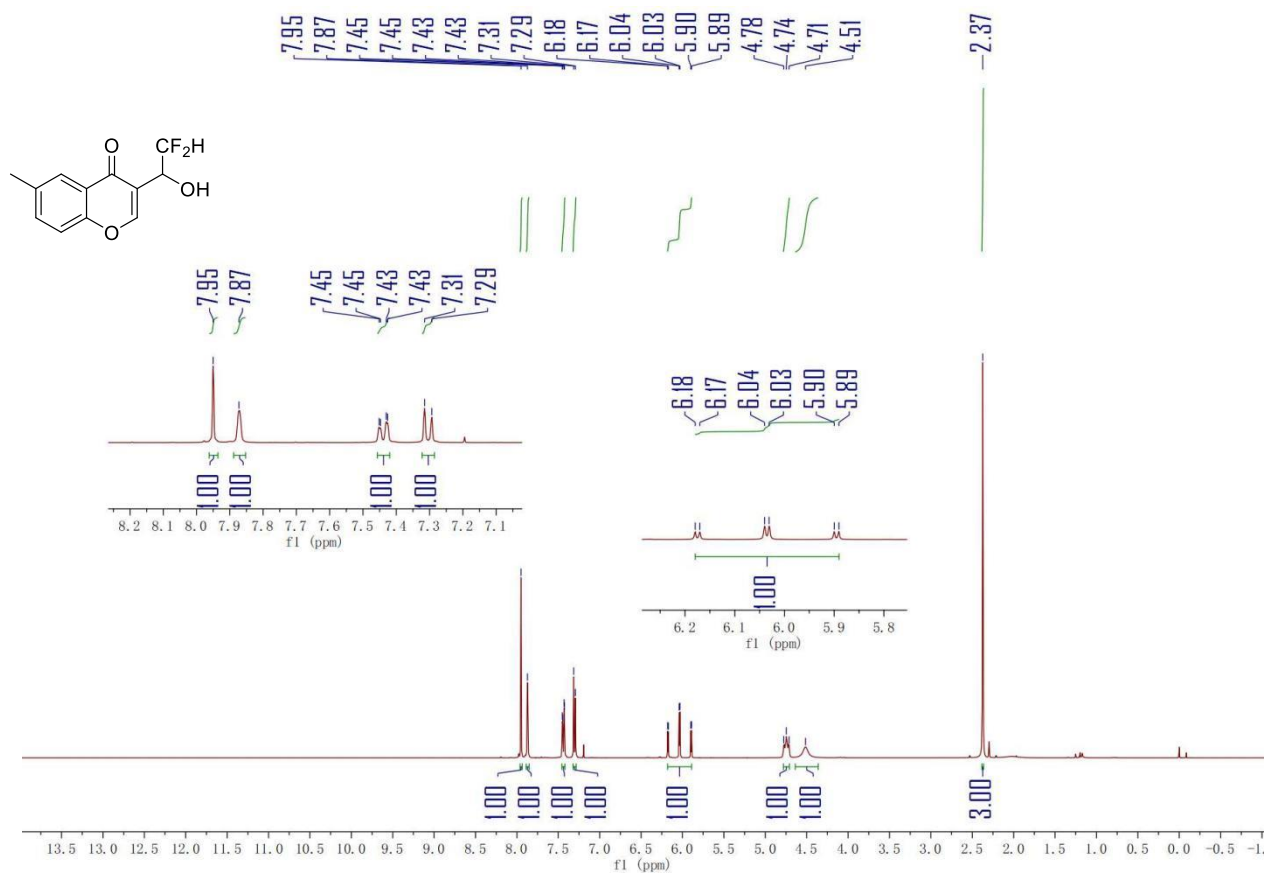

Fig. S5. <sup>1</sup>H NMR spectrum of compound **3b**

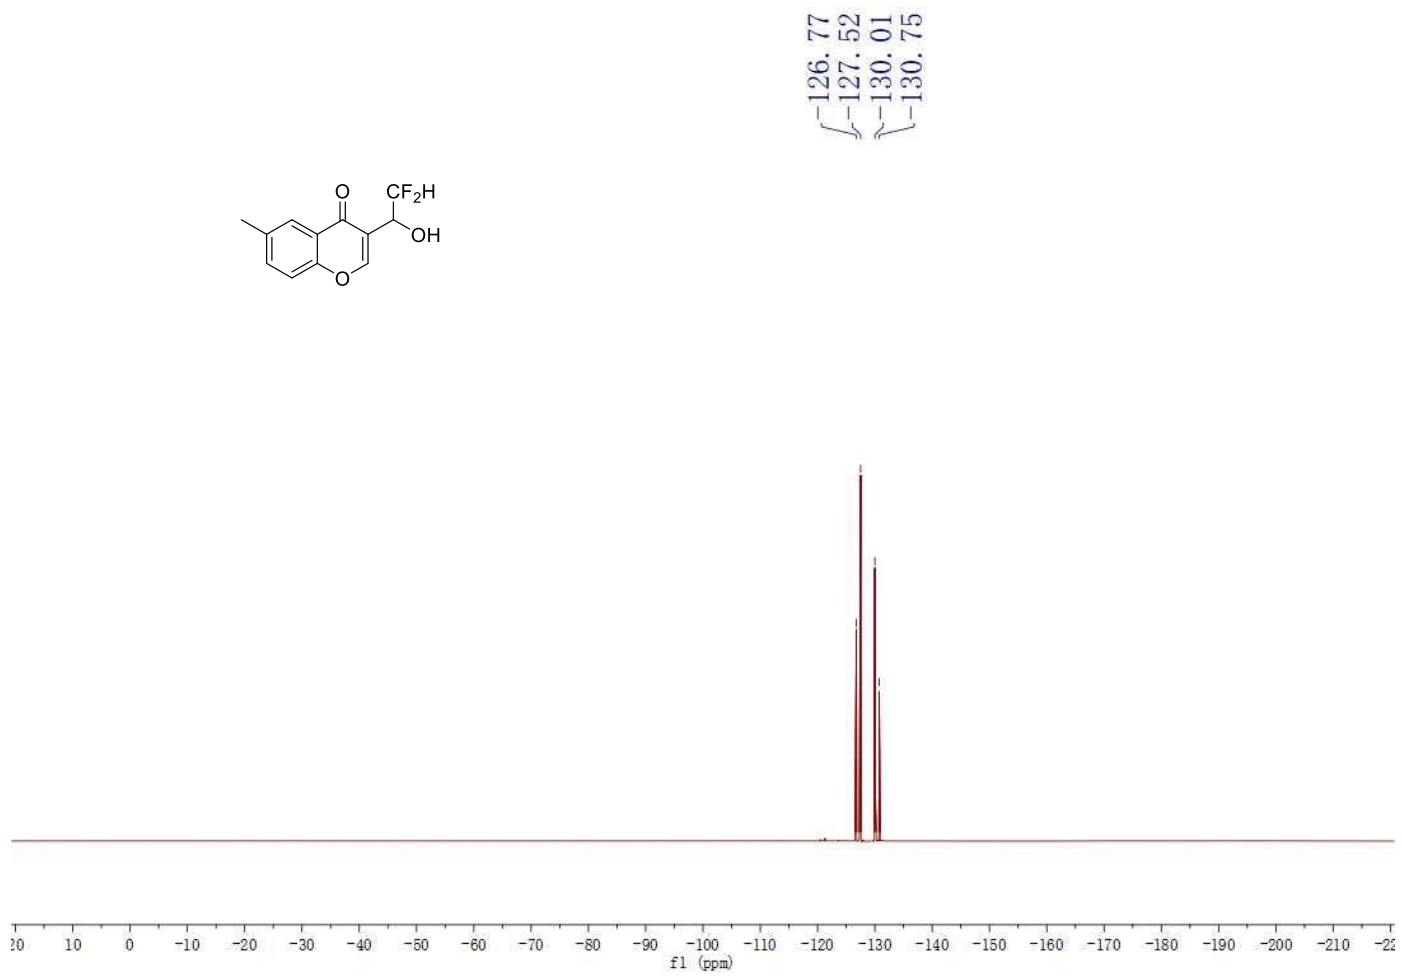

**Fig. S6.**  $^{19}\text{F}$  NMR spectrum of compound **3b**

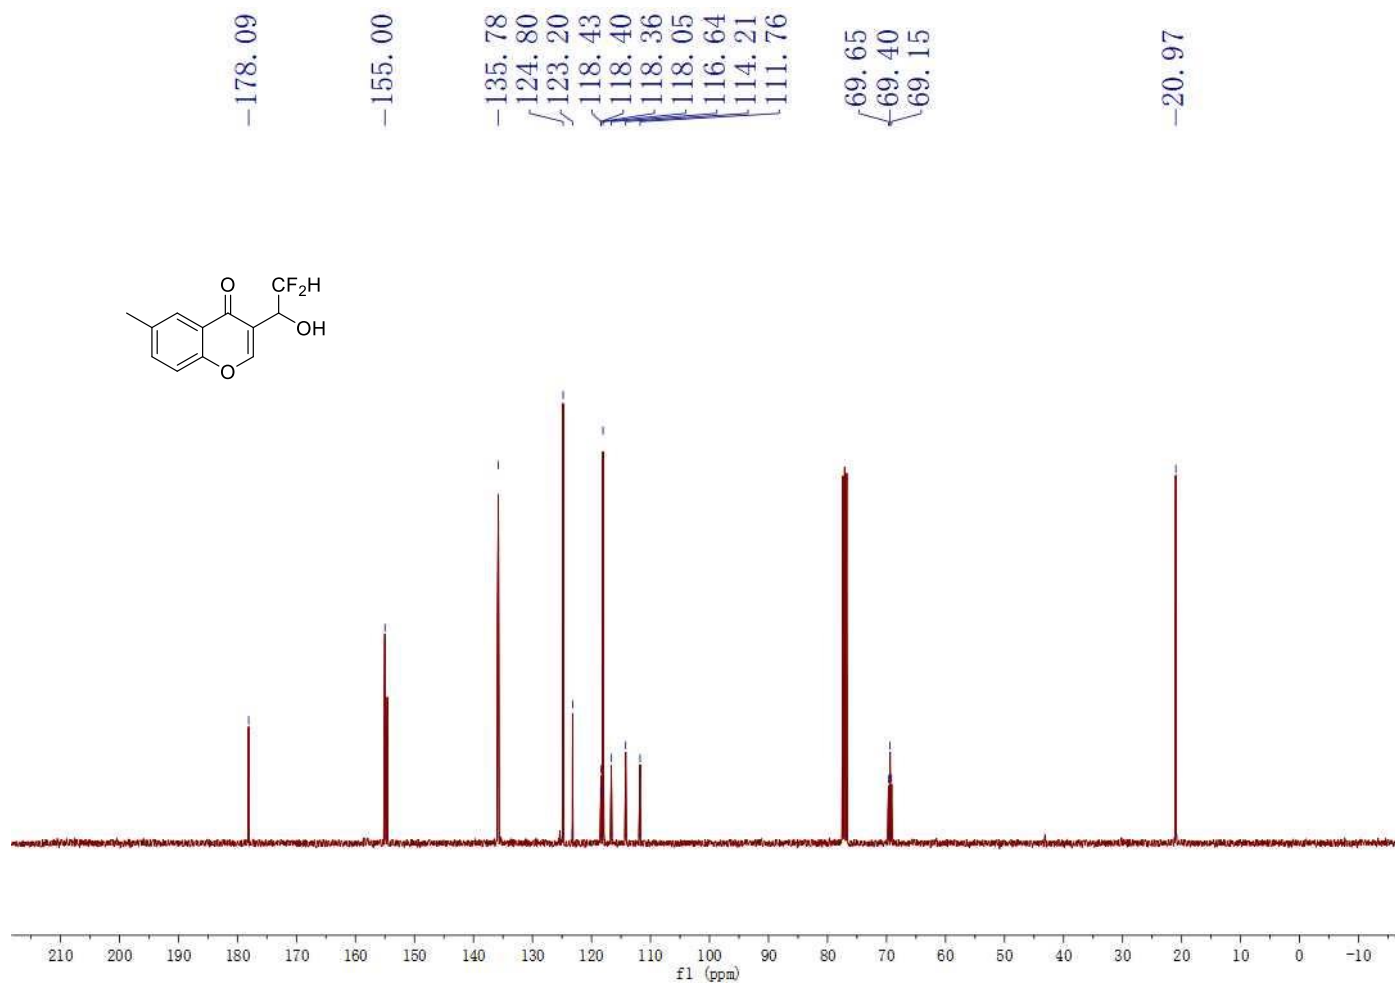

**Fig. S7.** <sup>13</sup>C NMR spectrum of compound **3b**

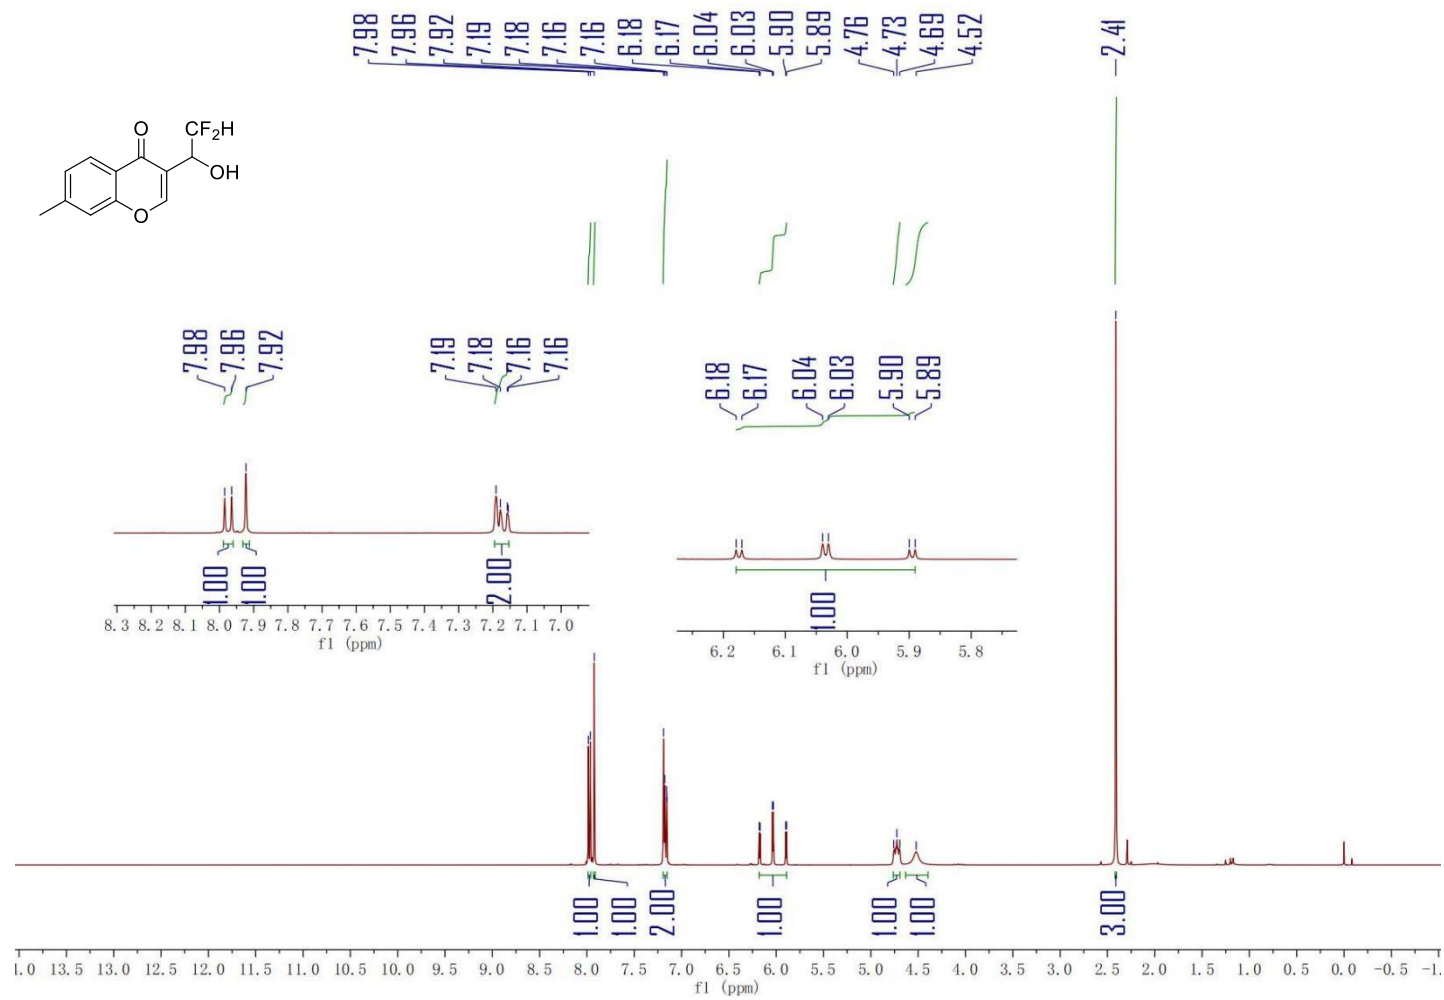

Fig. S8. <sup>1</sup>H NMR spectrum of compound 3c

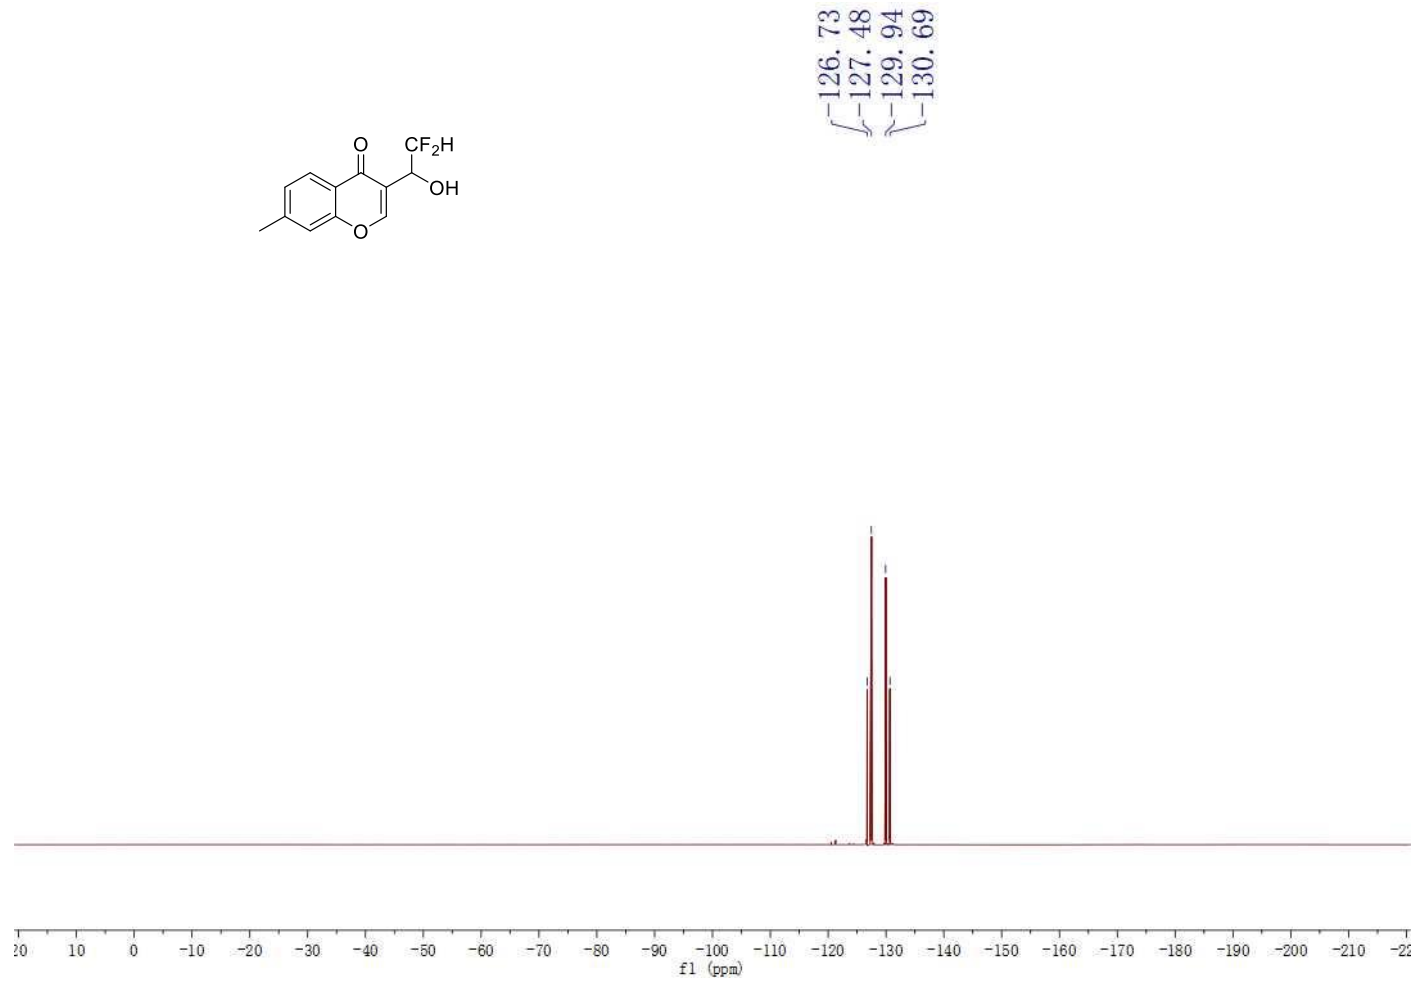

**Fig. S9.**  $^{19}\text{F}$  NMR spectrum of compound 3c

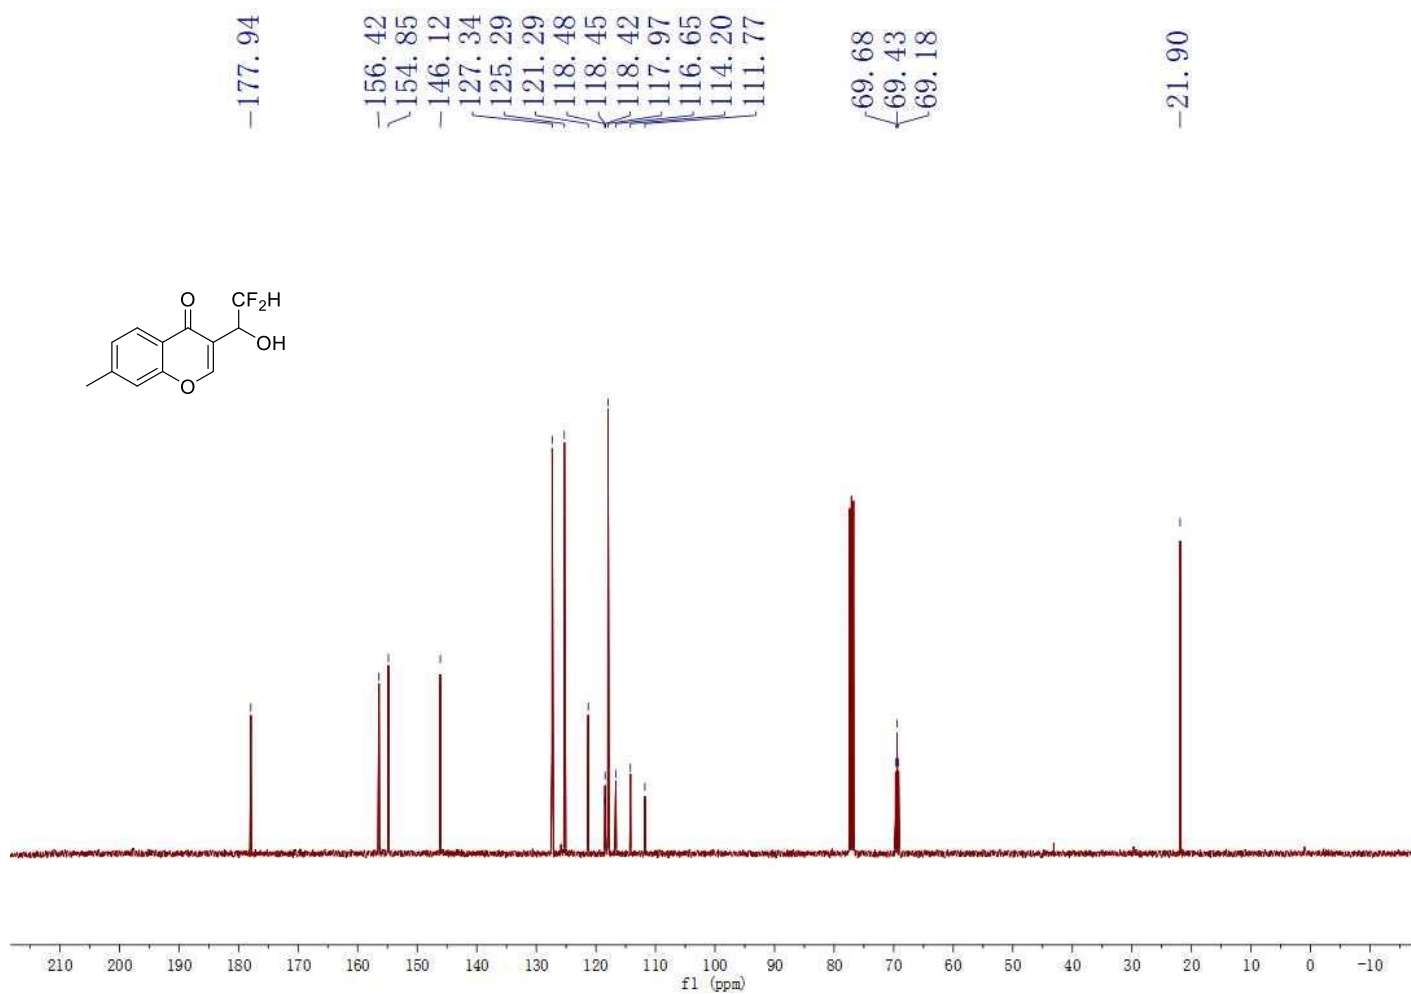

Fig. S10. <sup>13</sup>C NMR spectrum of compound 3c

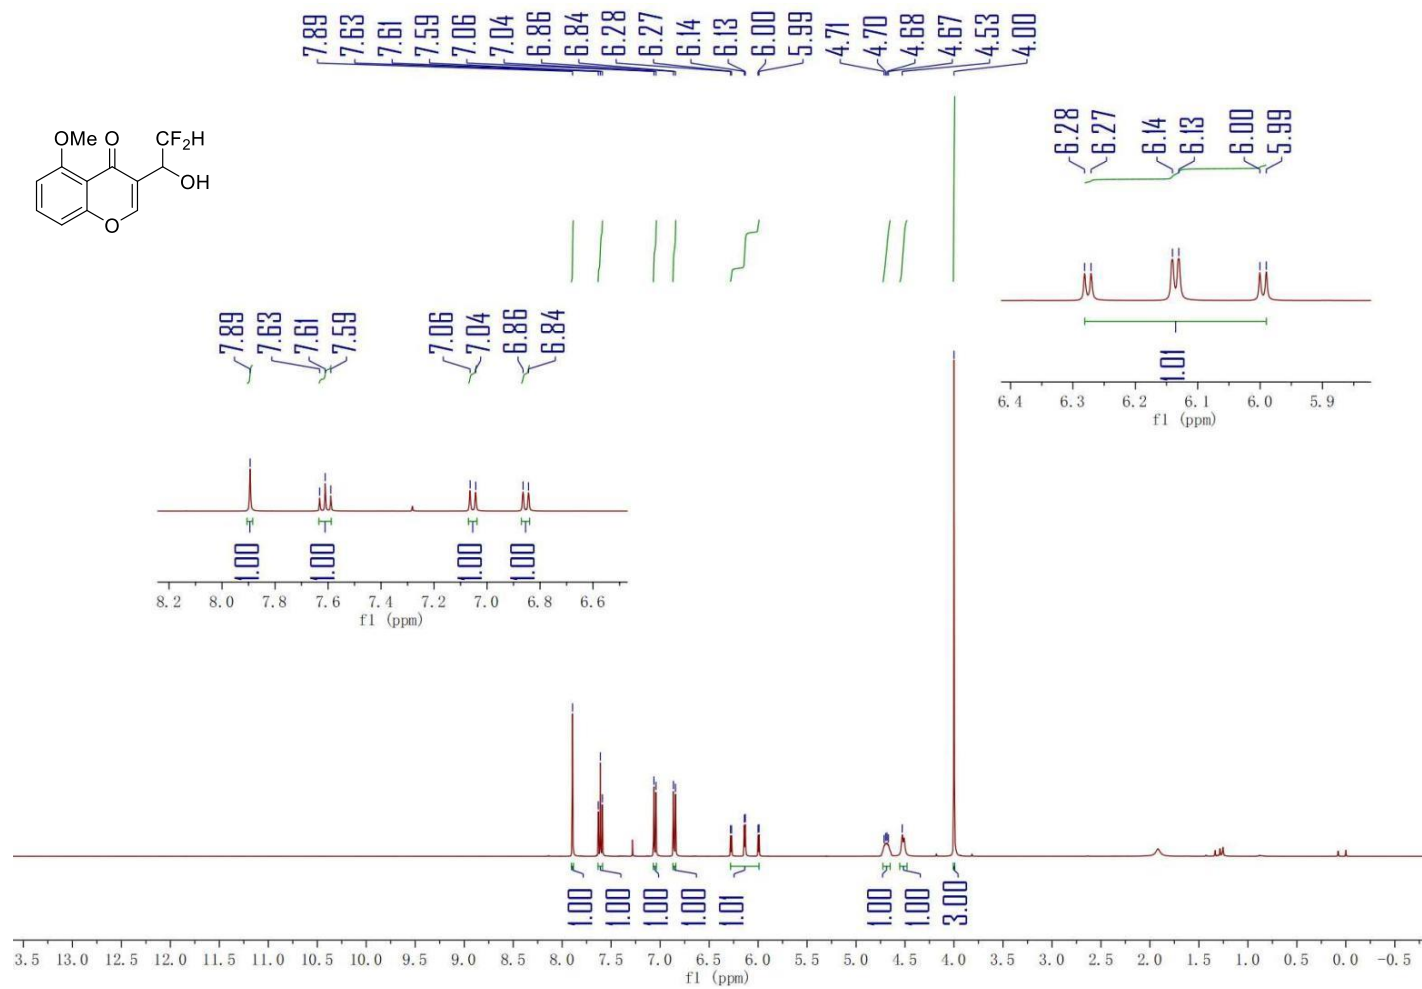

**Fig. S11.**  $^1\text{H}$  NMR spectrum of compound **3d**



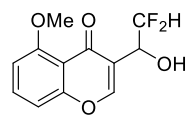

125.61  
126.36  
129.69  
130.44

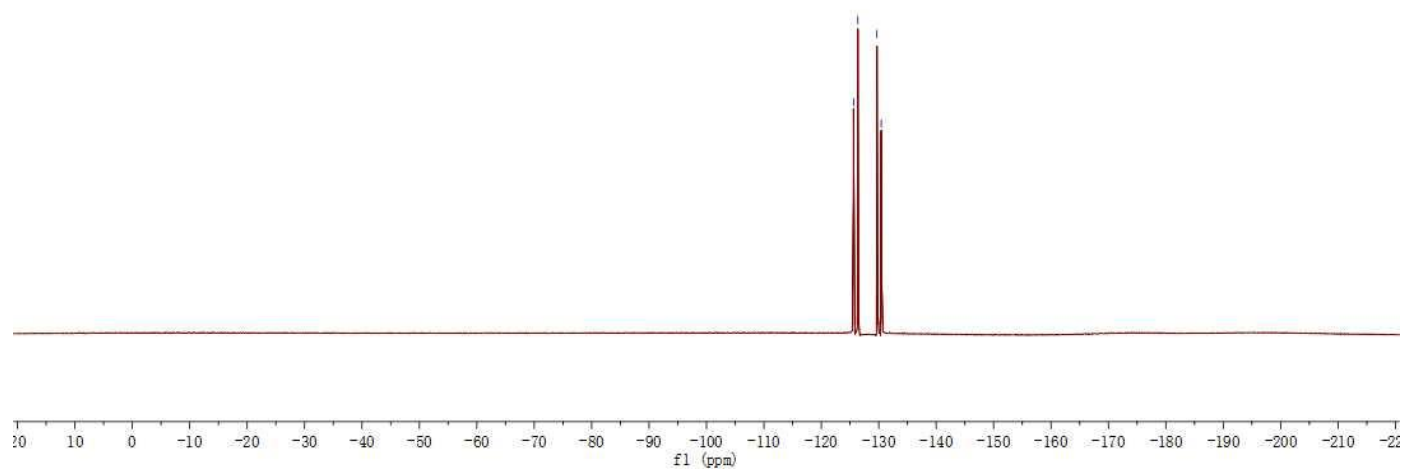

**Fig. S12.**  $^{19}\text{F}$  NMR spectrum of compound **3d**

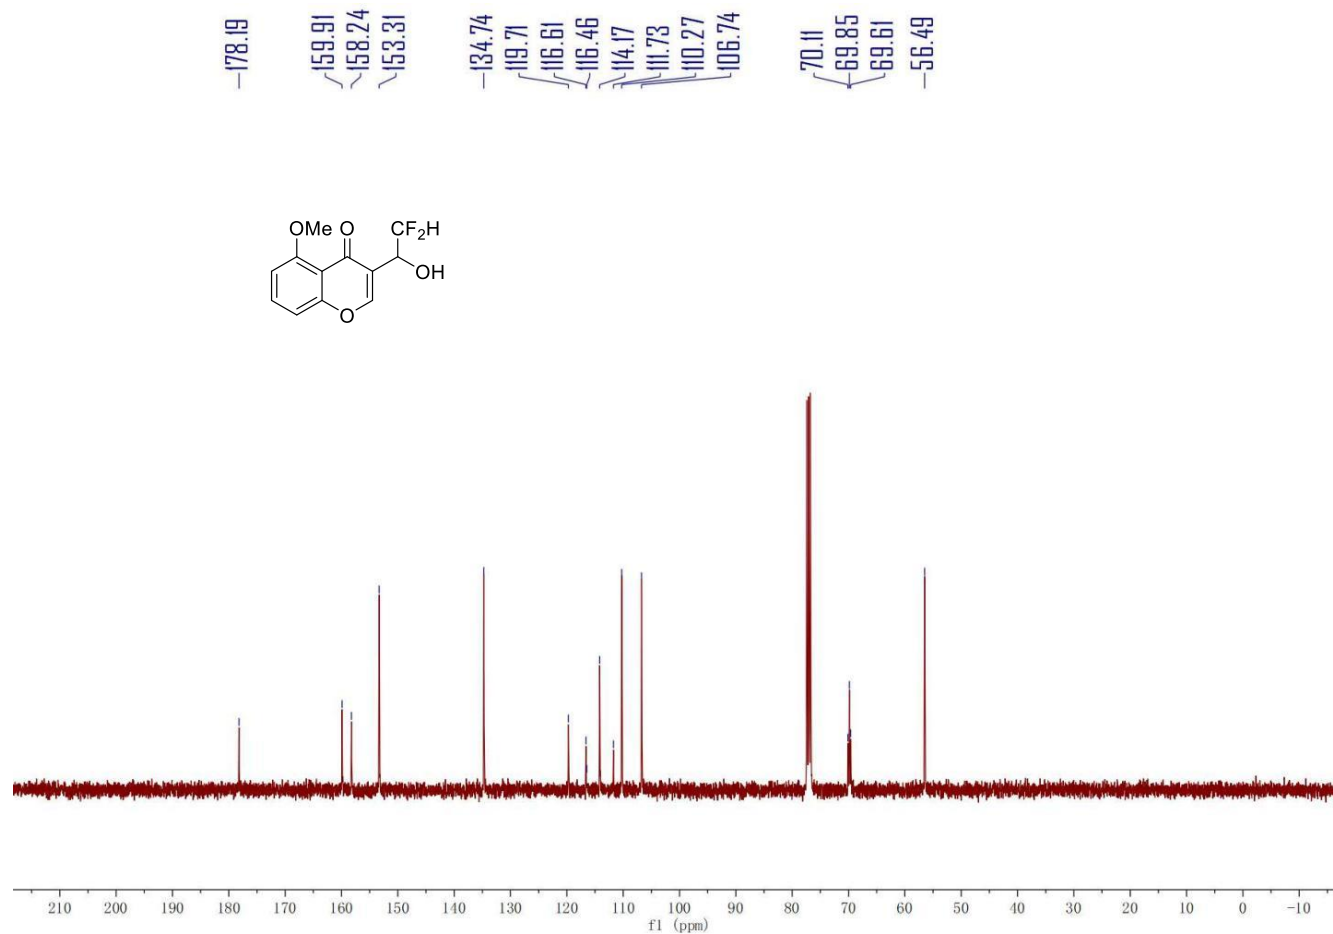

**Fig. S13.** <sup>13</sup>C NMR spectrum of compound **3d**

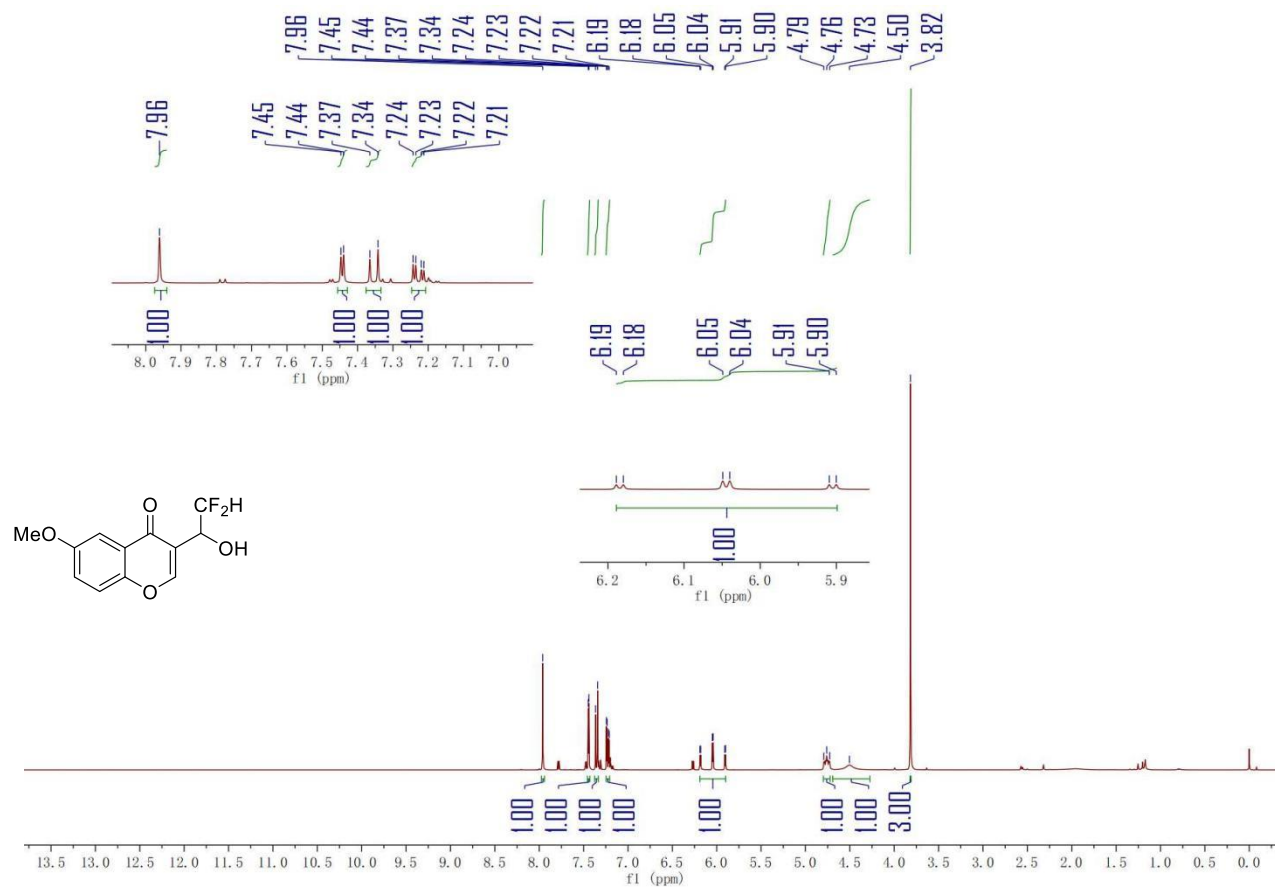

Fig. S14. <sup>1</sup>H NMR spectrum of compound 3e

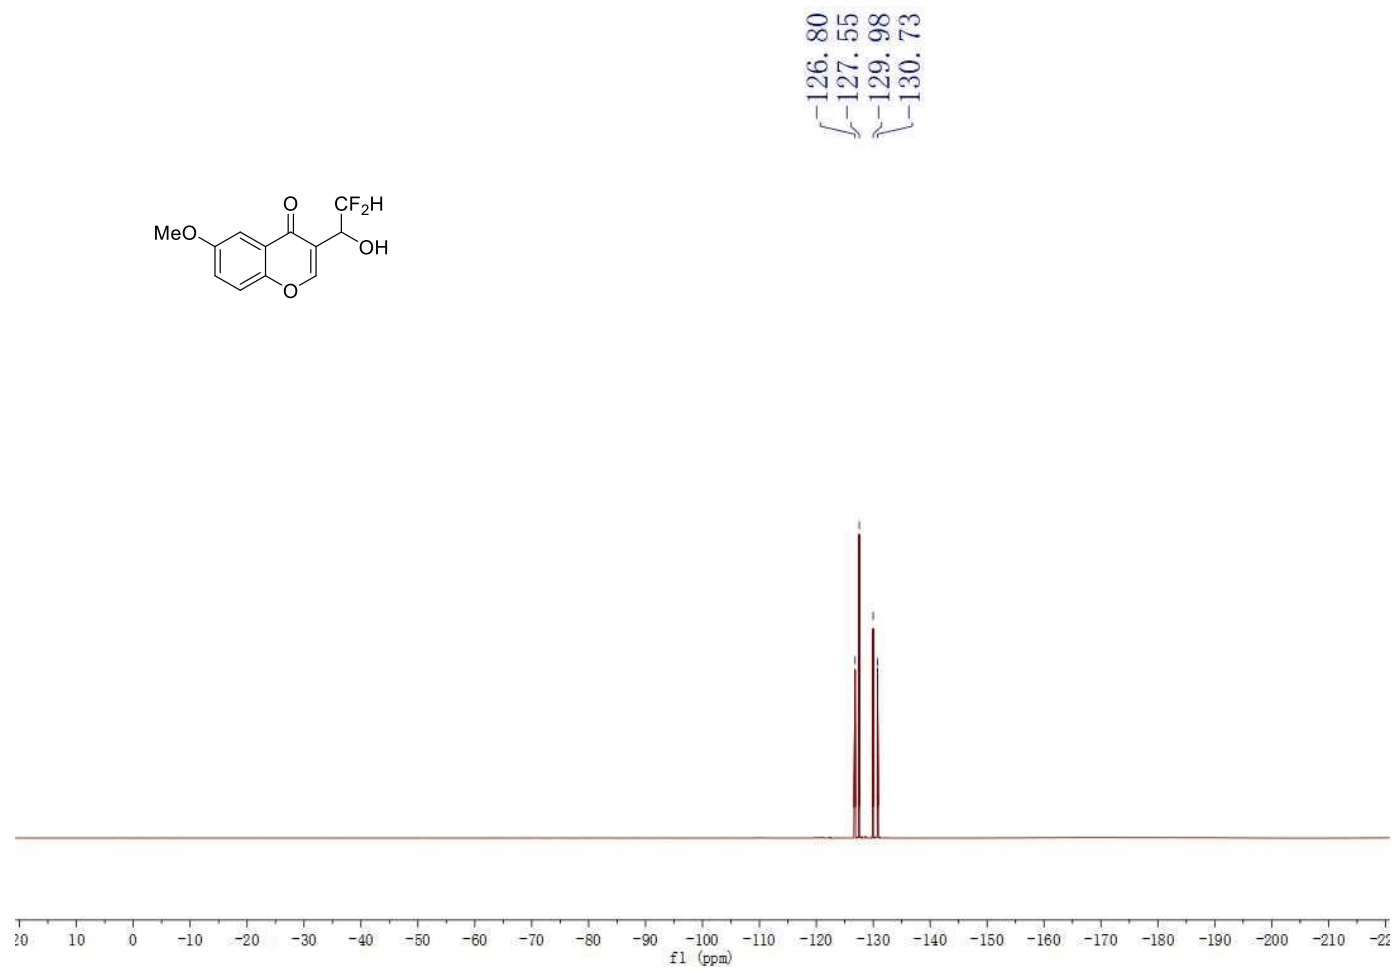

**Fig. S15.**  $^{19}\text{F}$  NMR spectrum of compound **3e**

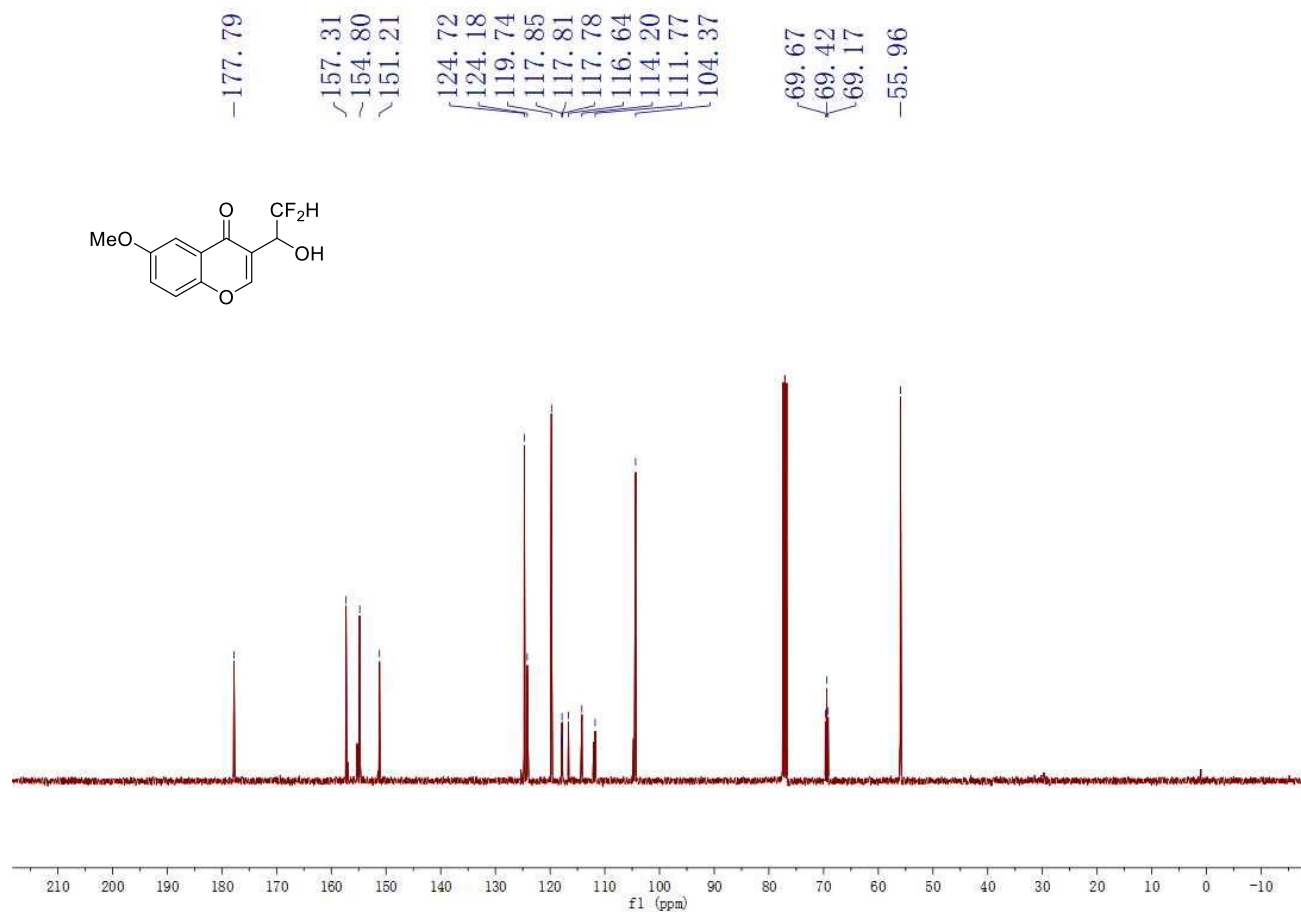

**Fig. S16.** <sup>13</sup>C NMR spectrum of compound **3e**

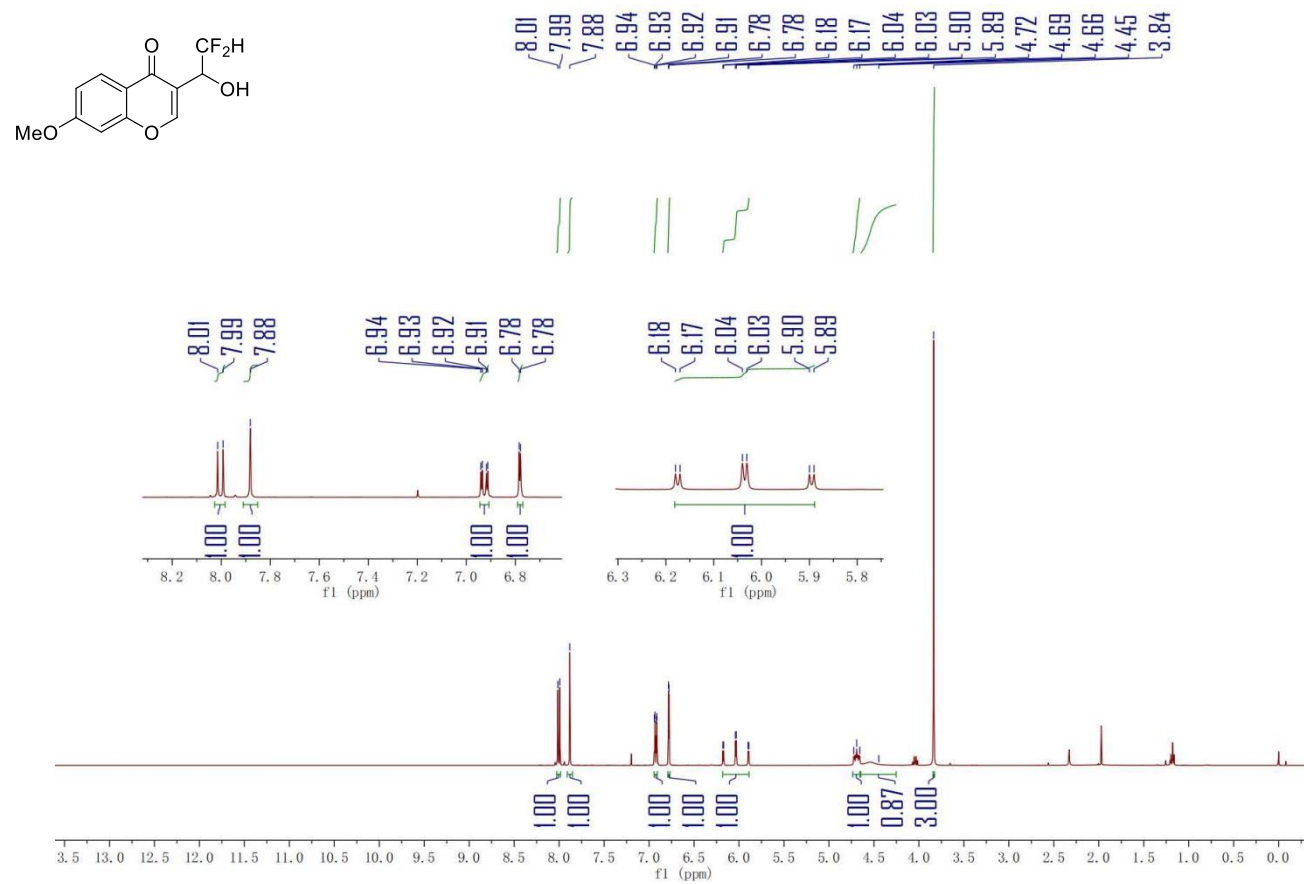

Fig. S17. <sup>1</sup>H NMR spectrum of compound **3f**

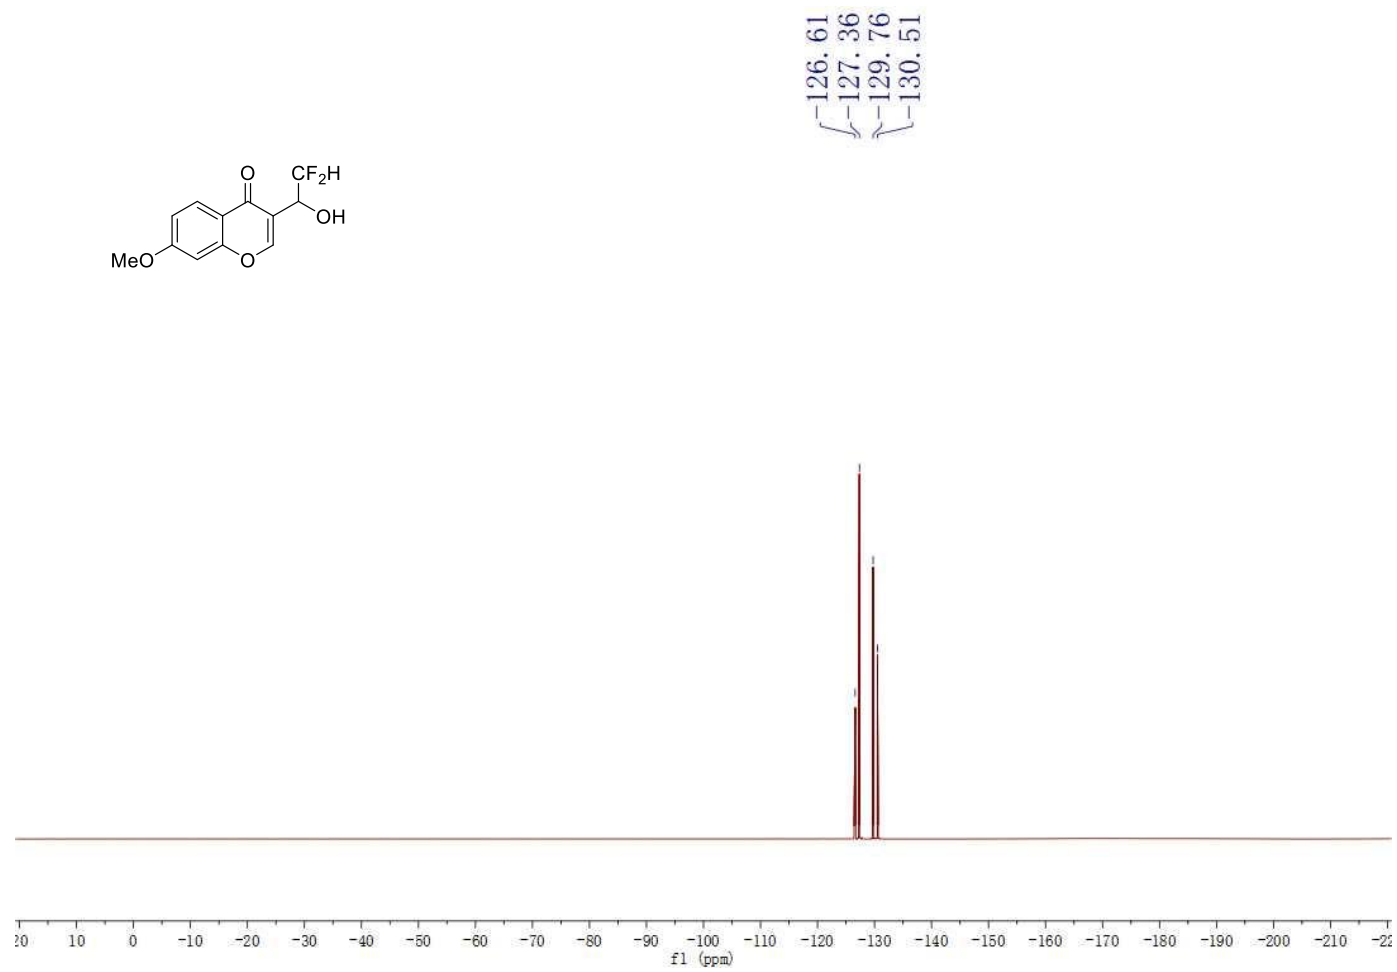

**Fig. S18.**  $^{19}\text{F}$  NMR spectrum of compound **3f**

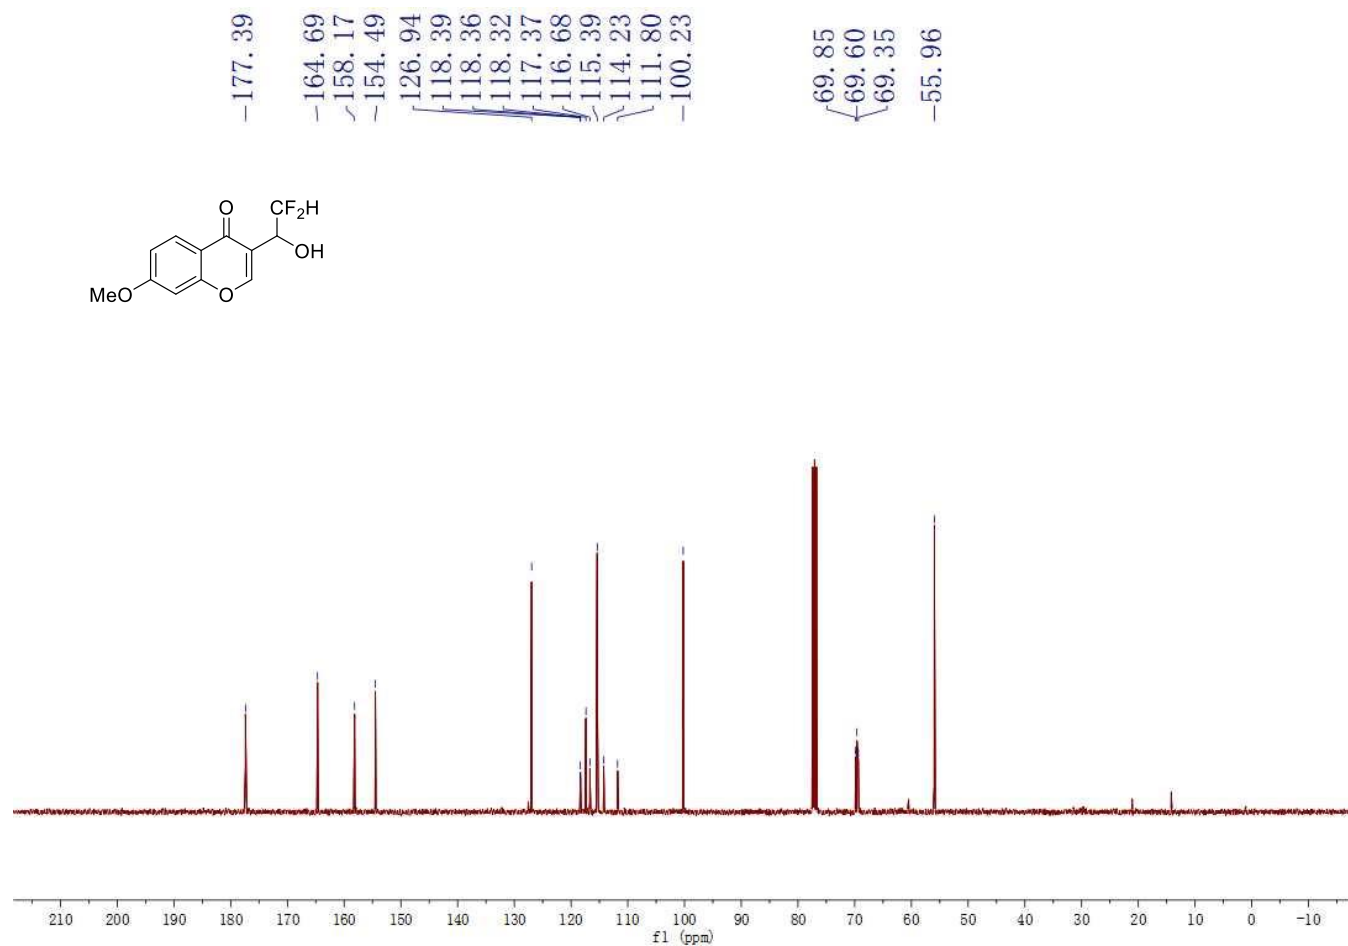

Fig. S19. <sup>13</sup>C NMR spectrum of compound 3f



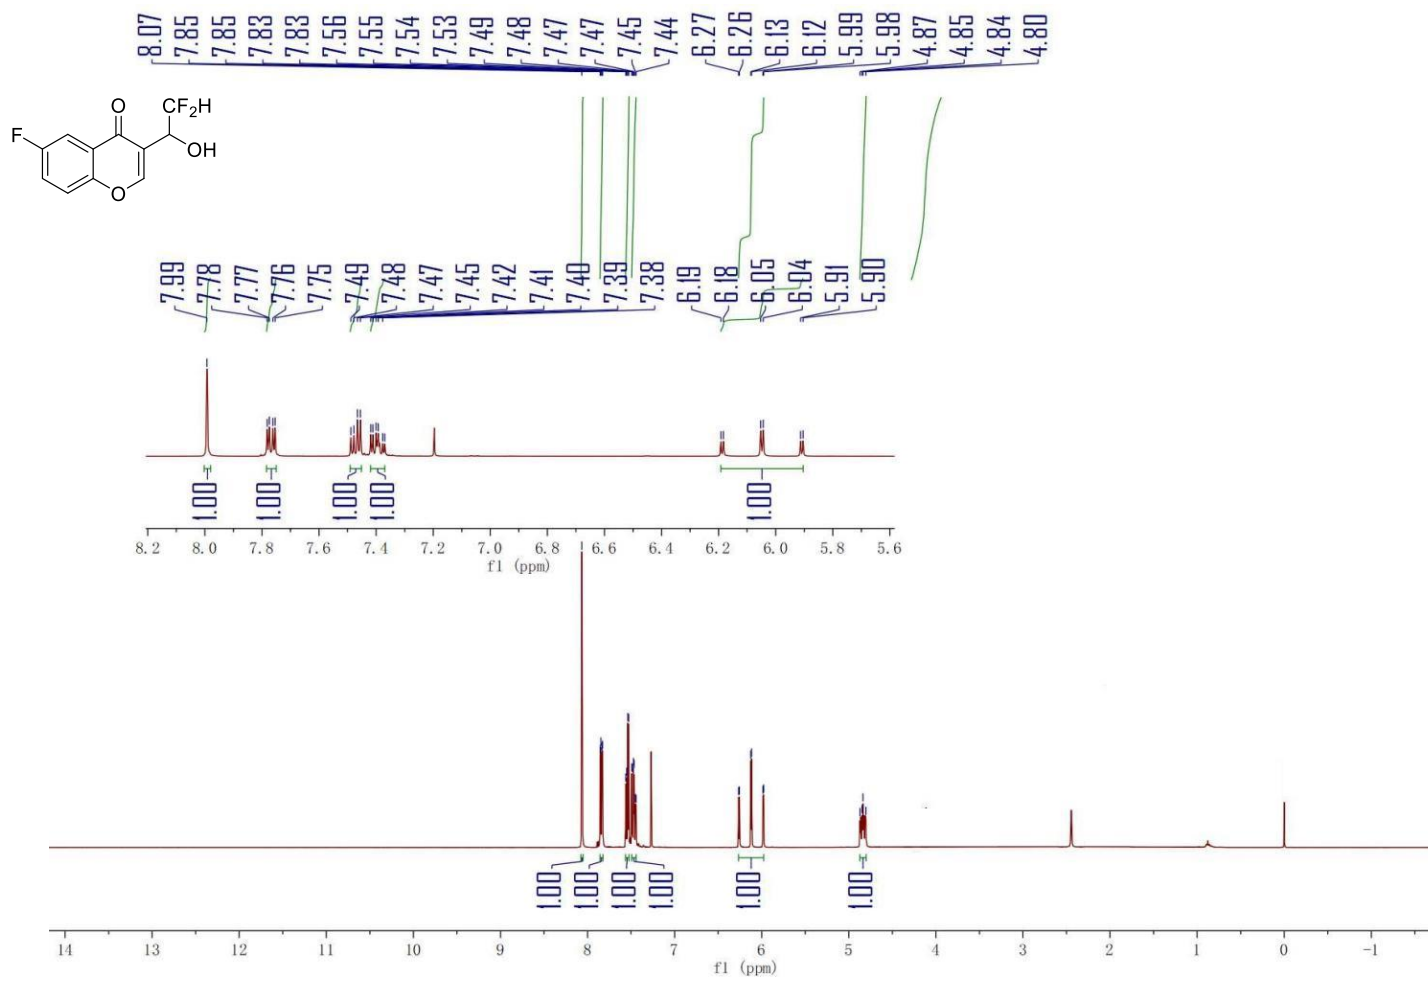

Fig. S20. <sup>1</sup>H NMR spectrum of compound **3g**

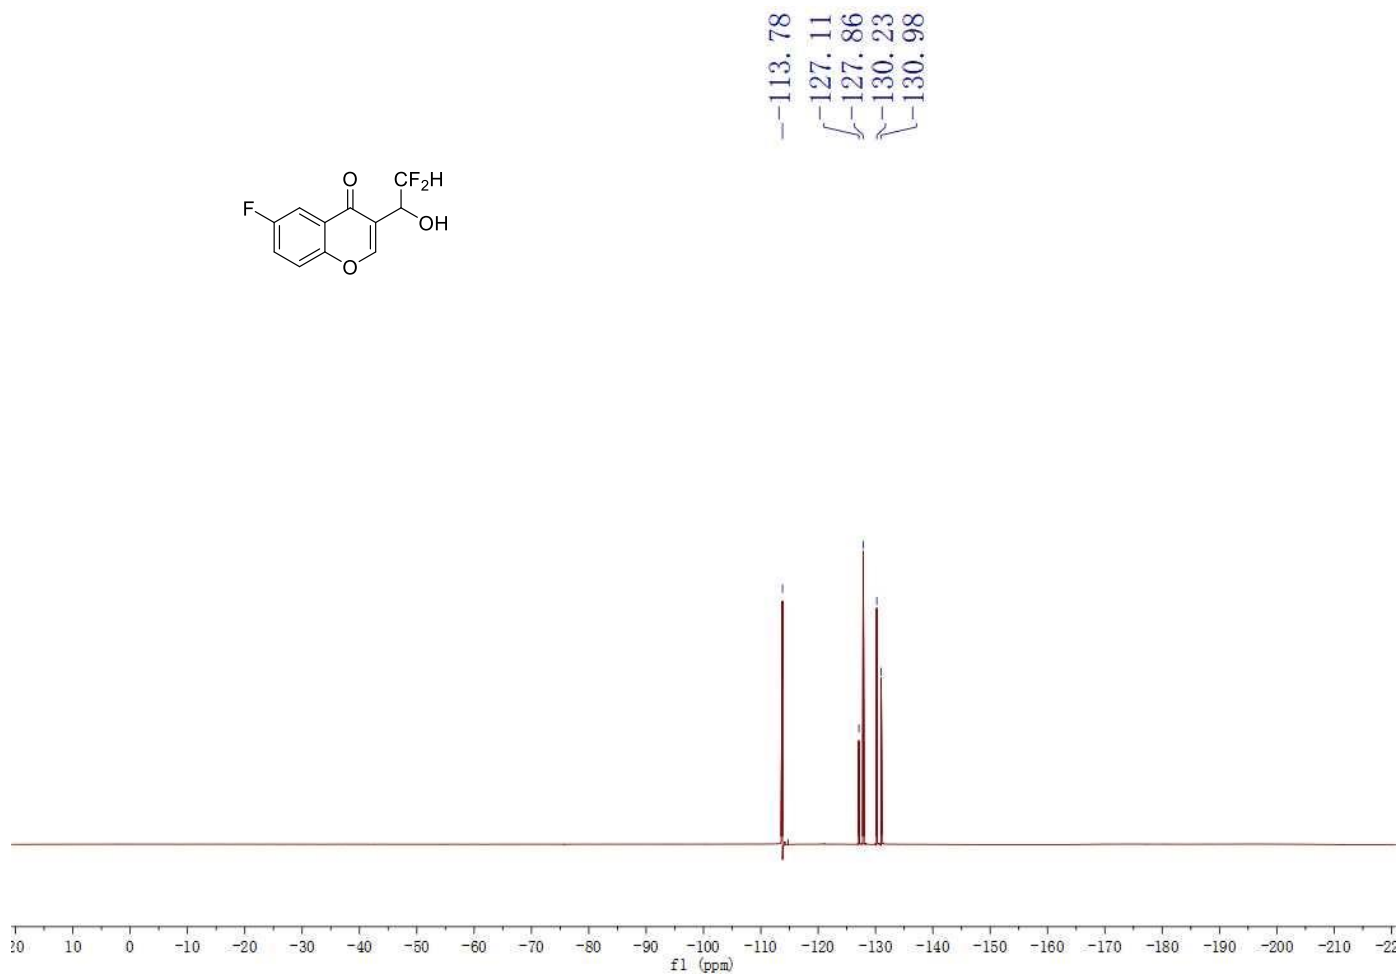

**Fig. S21.** <sup>19</sup>F NMR spectrum of compound **3g**

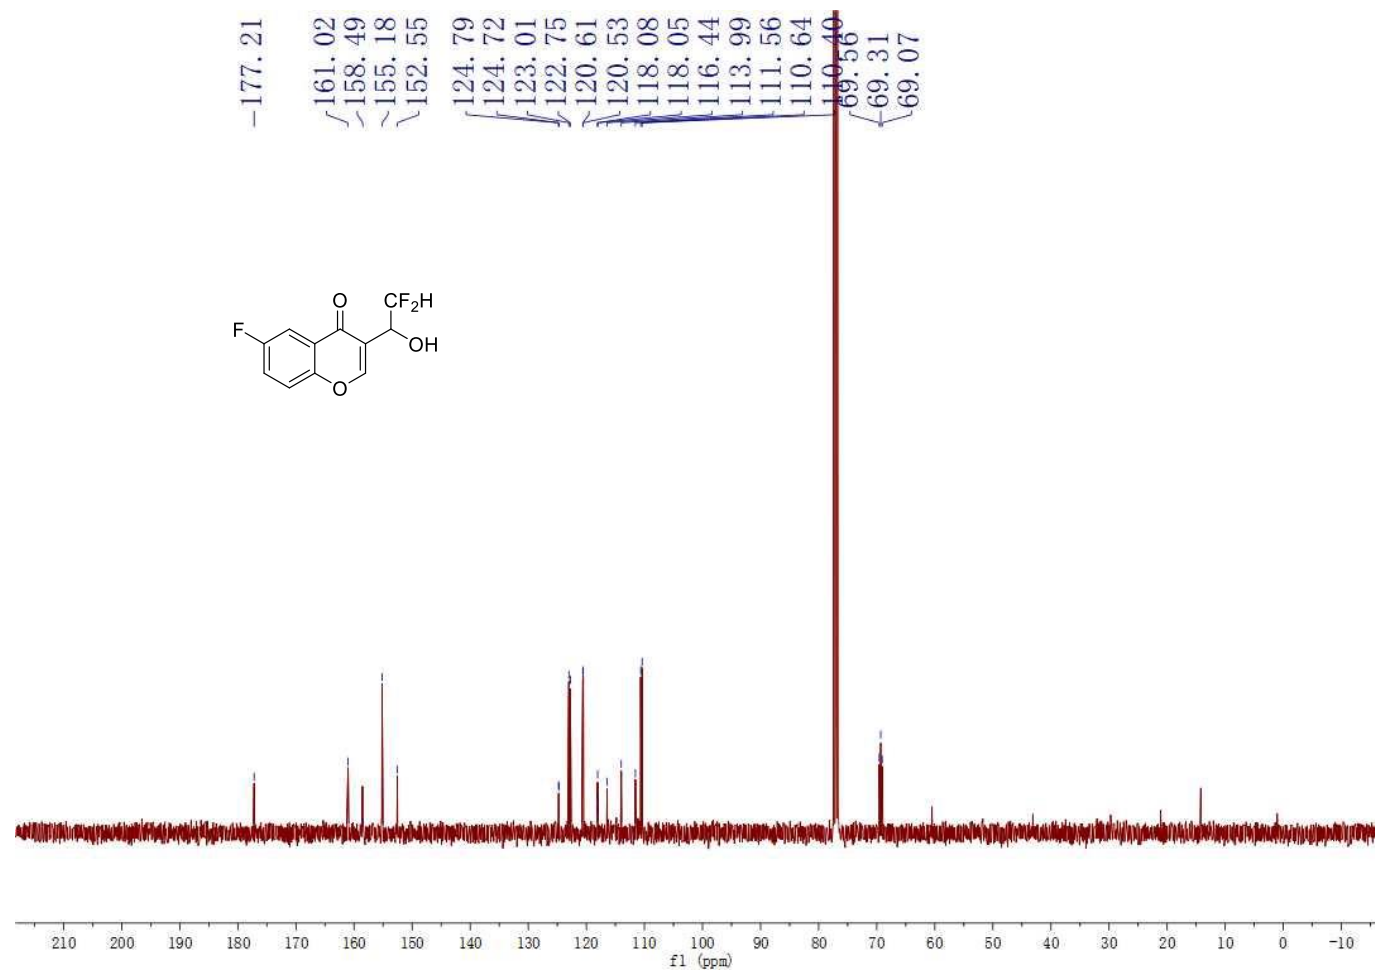

Fig. S22. <sup>13</sup>C NMR spectrum of compound 3g

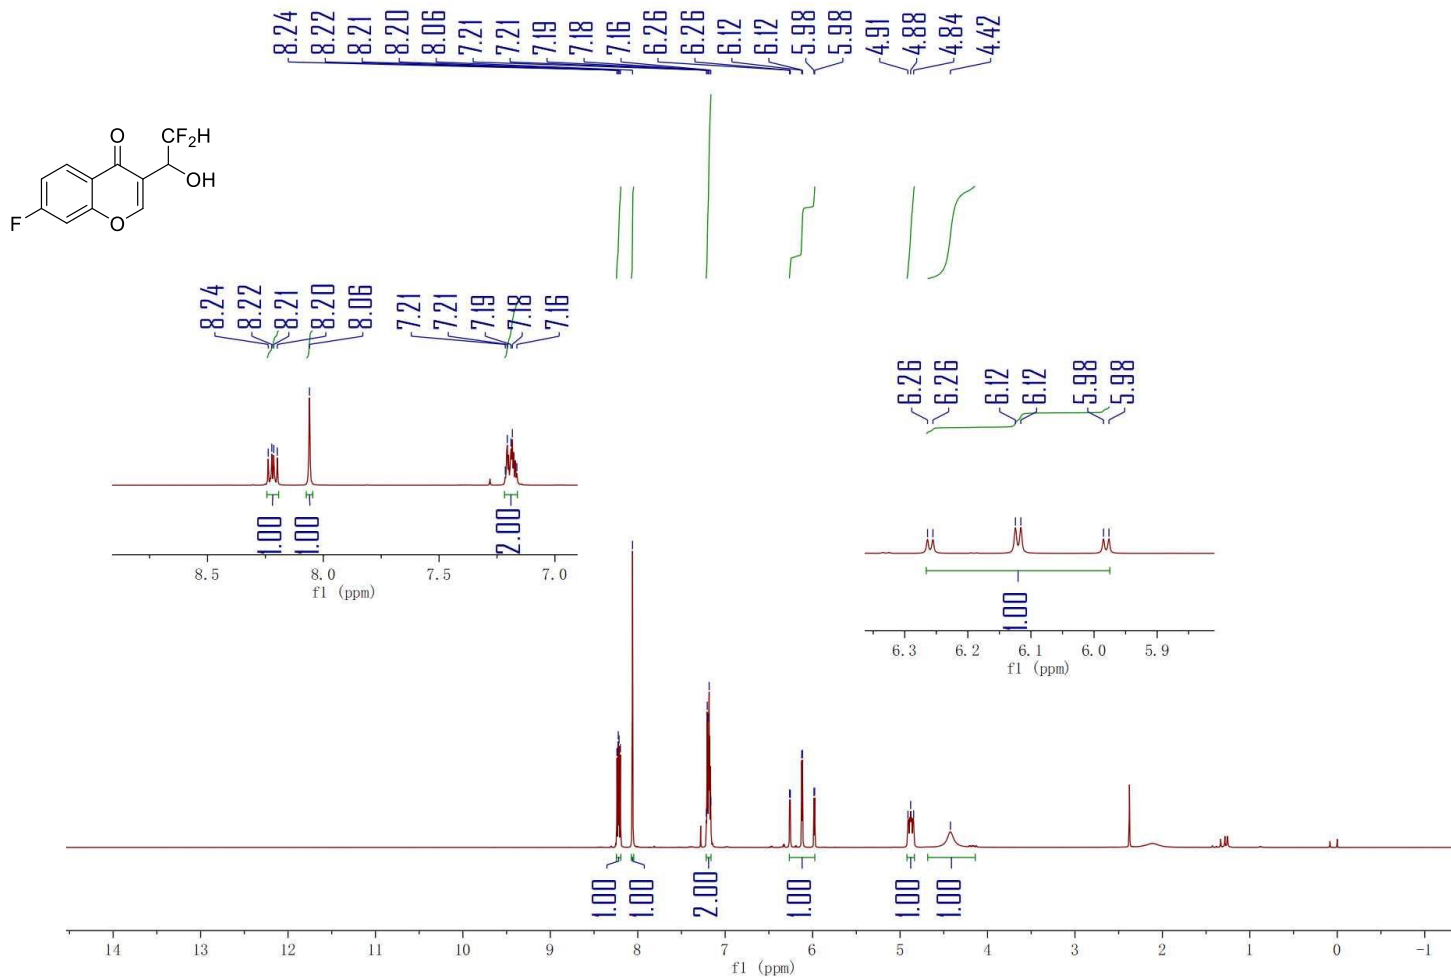

**Fig. S23.**  $^1\text{H}$  NMR spectrum of compound **3h**

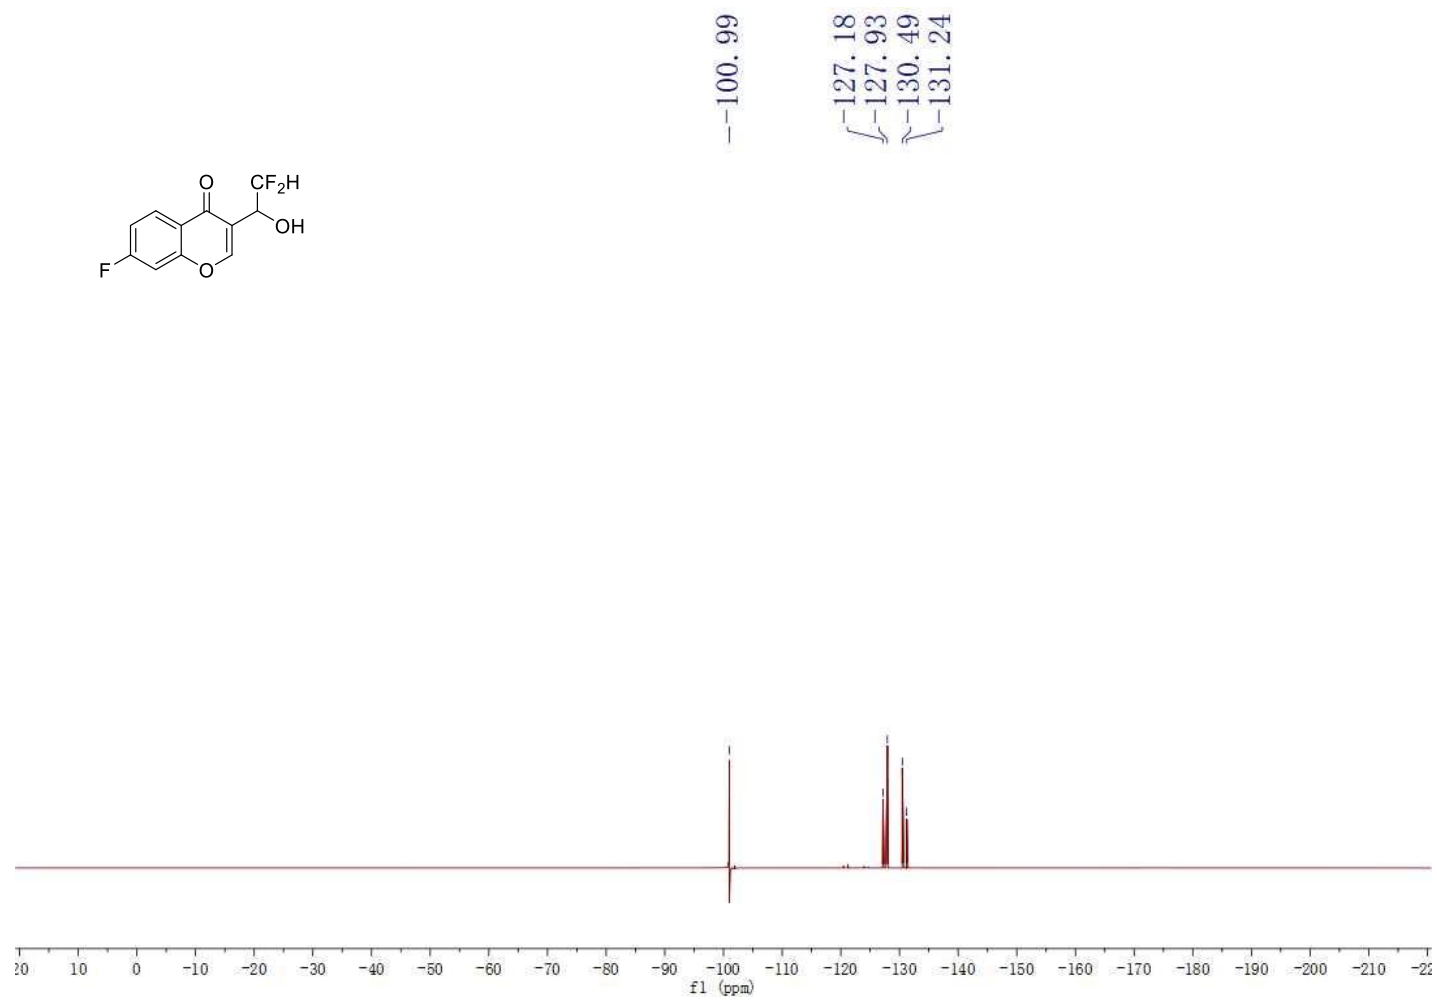

**Fig. S24.**  $^{19}\text{F}$  NMR spectrum of compound **3h**

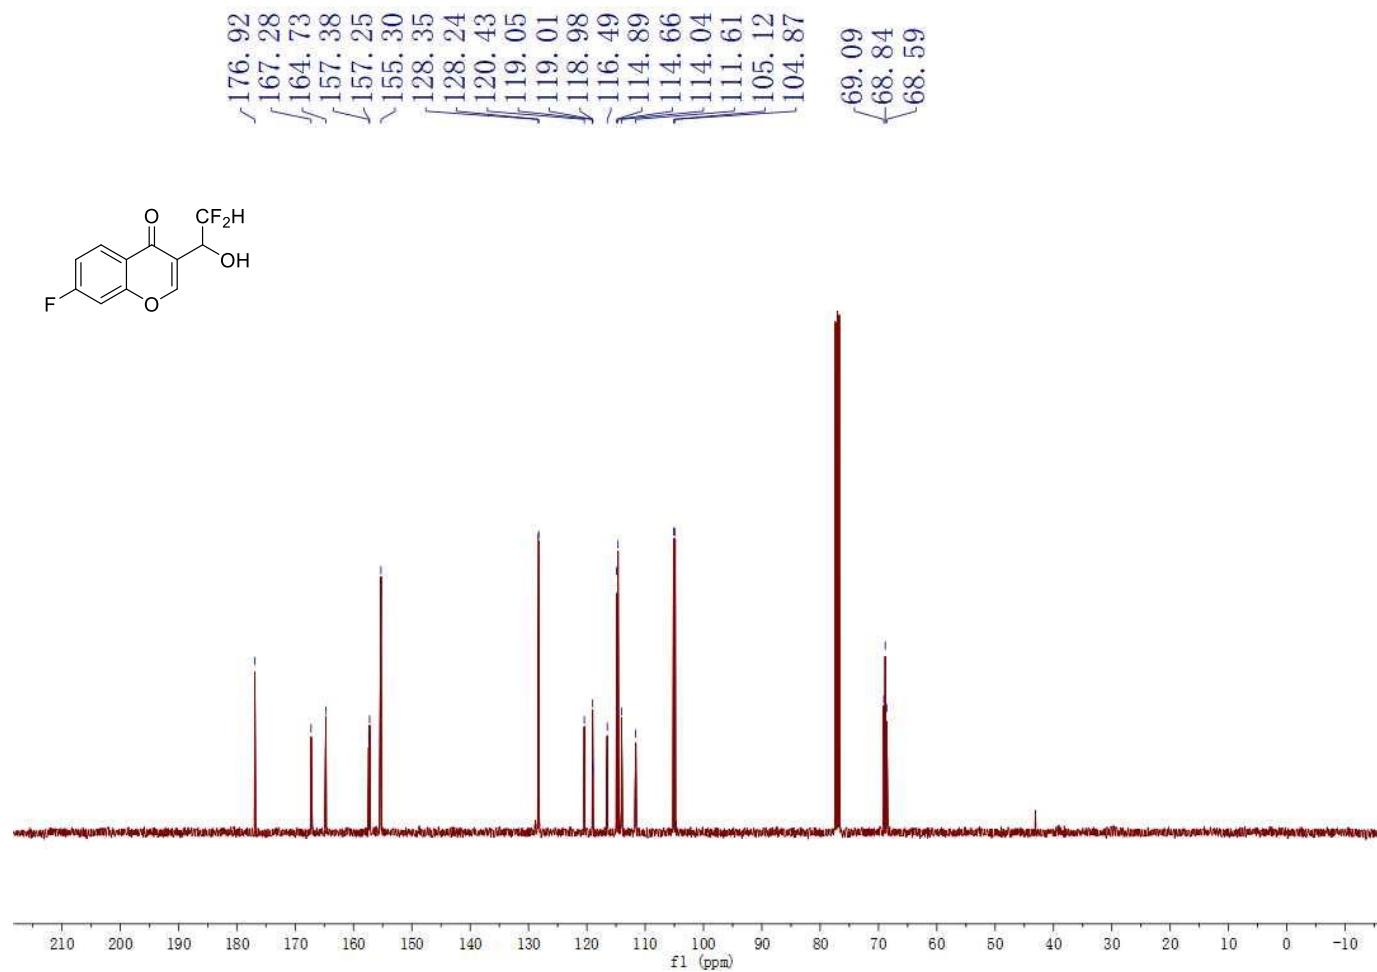

Fig. S25. <sup>13</sup>C NMR spectrum of compound 3h

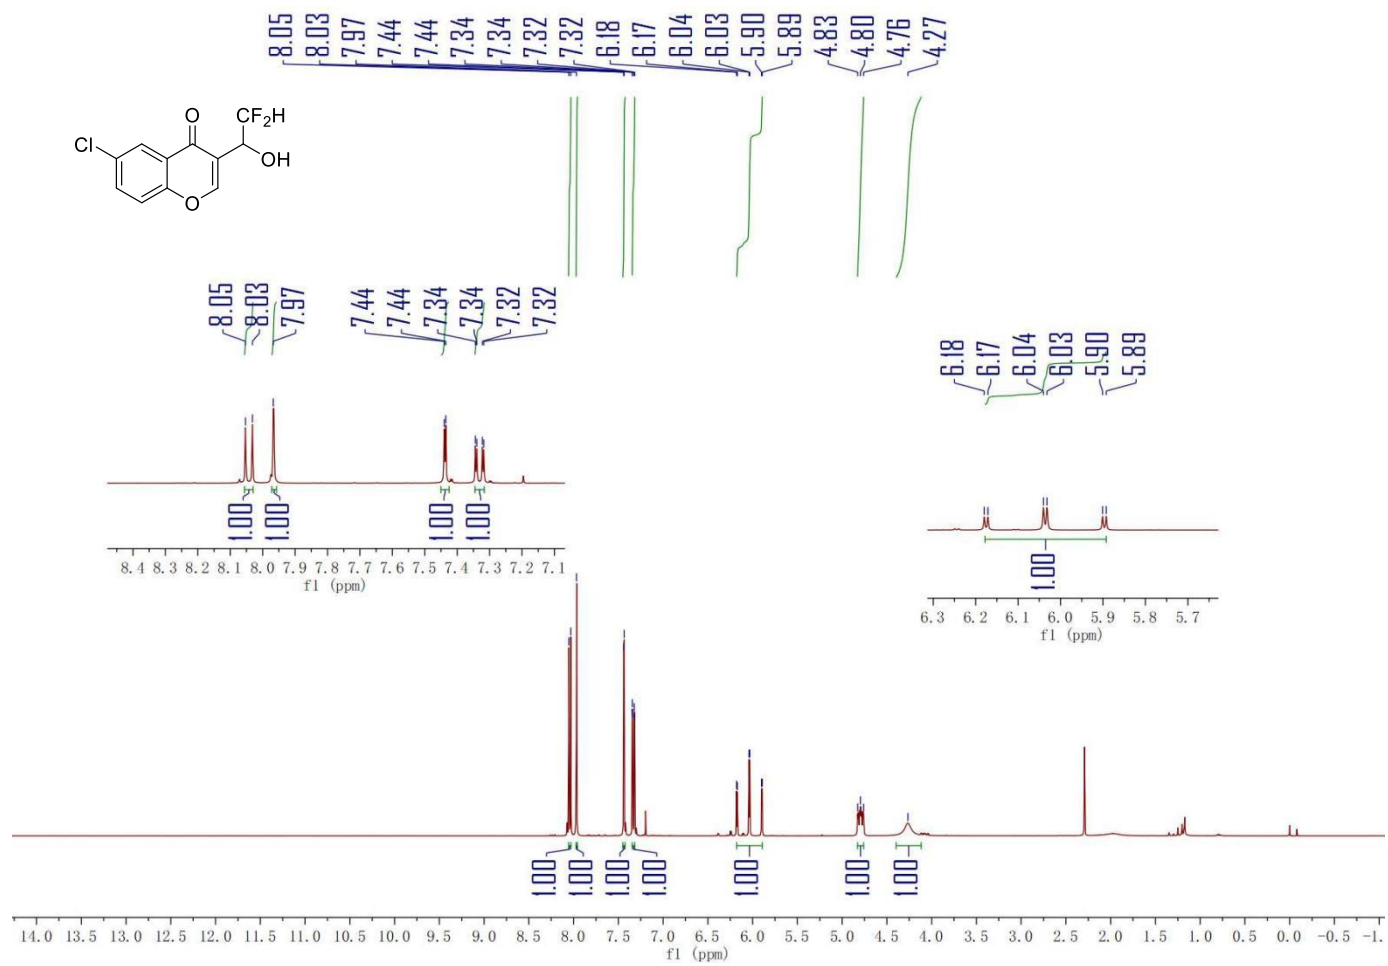

Fig. S26. <sup>1</sup>H NMR spectrum of compound **3i**

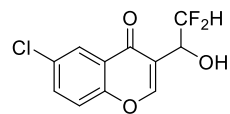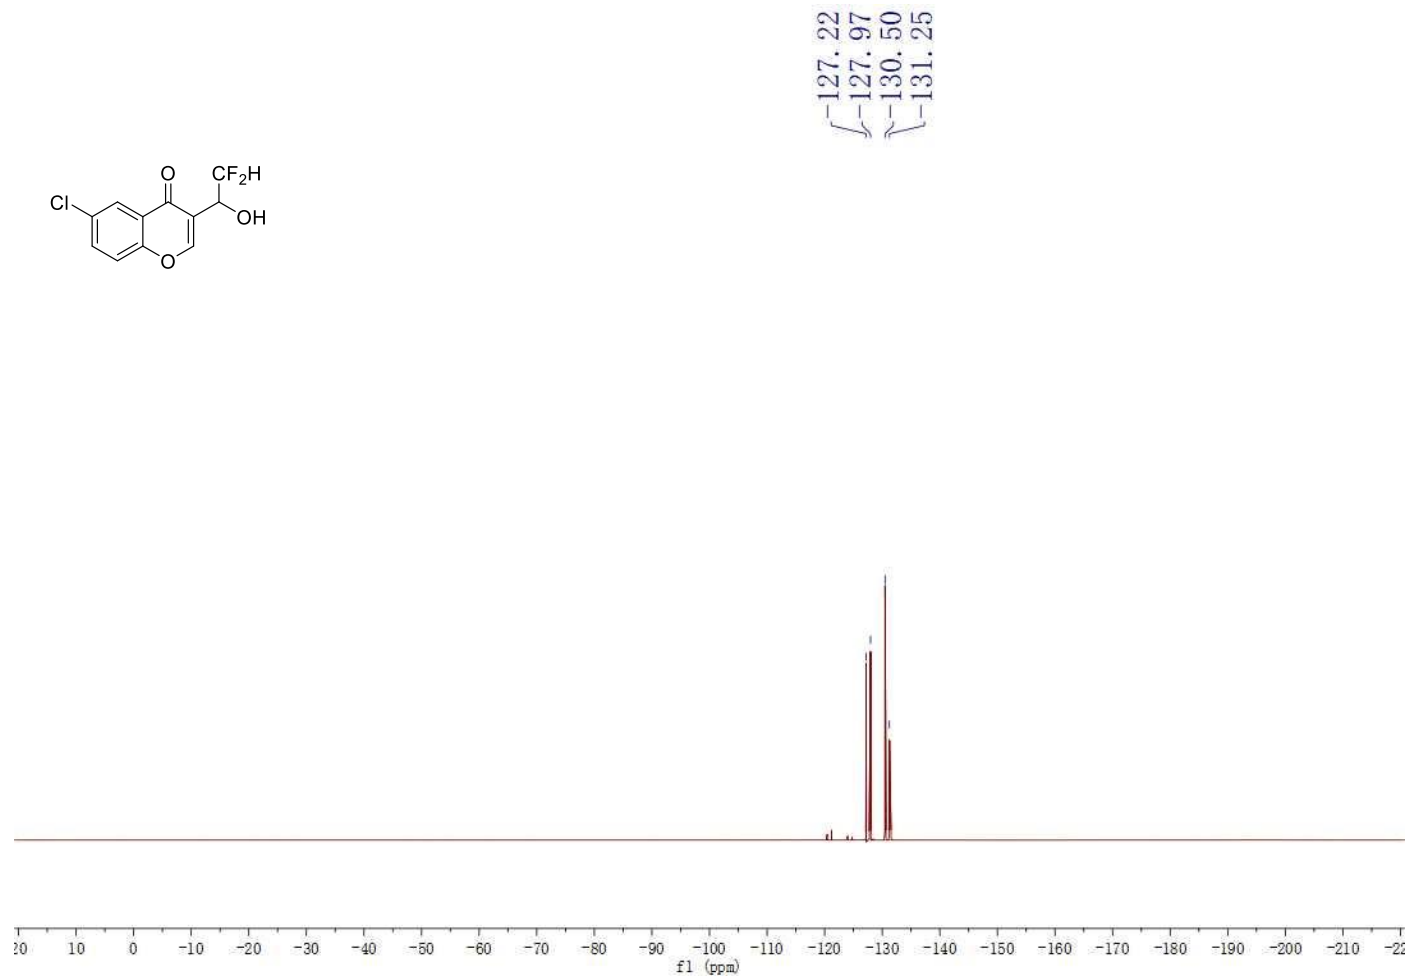

**Fig. S27.**  $^{19}\text{F}$  NMR spectrum of compound **3i**



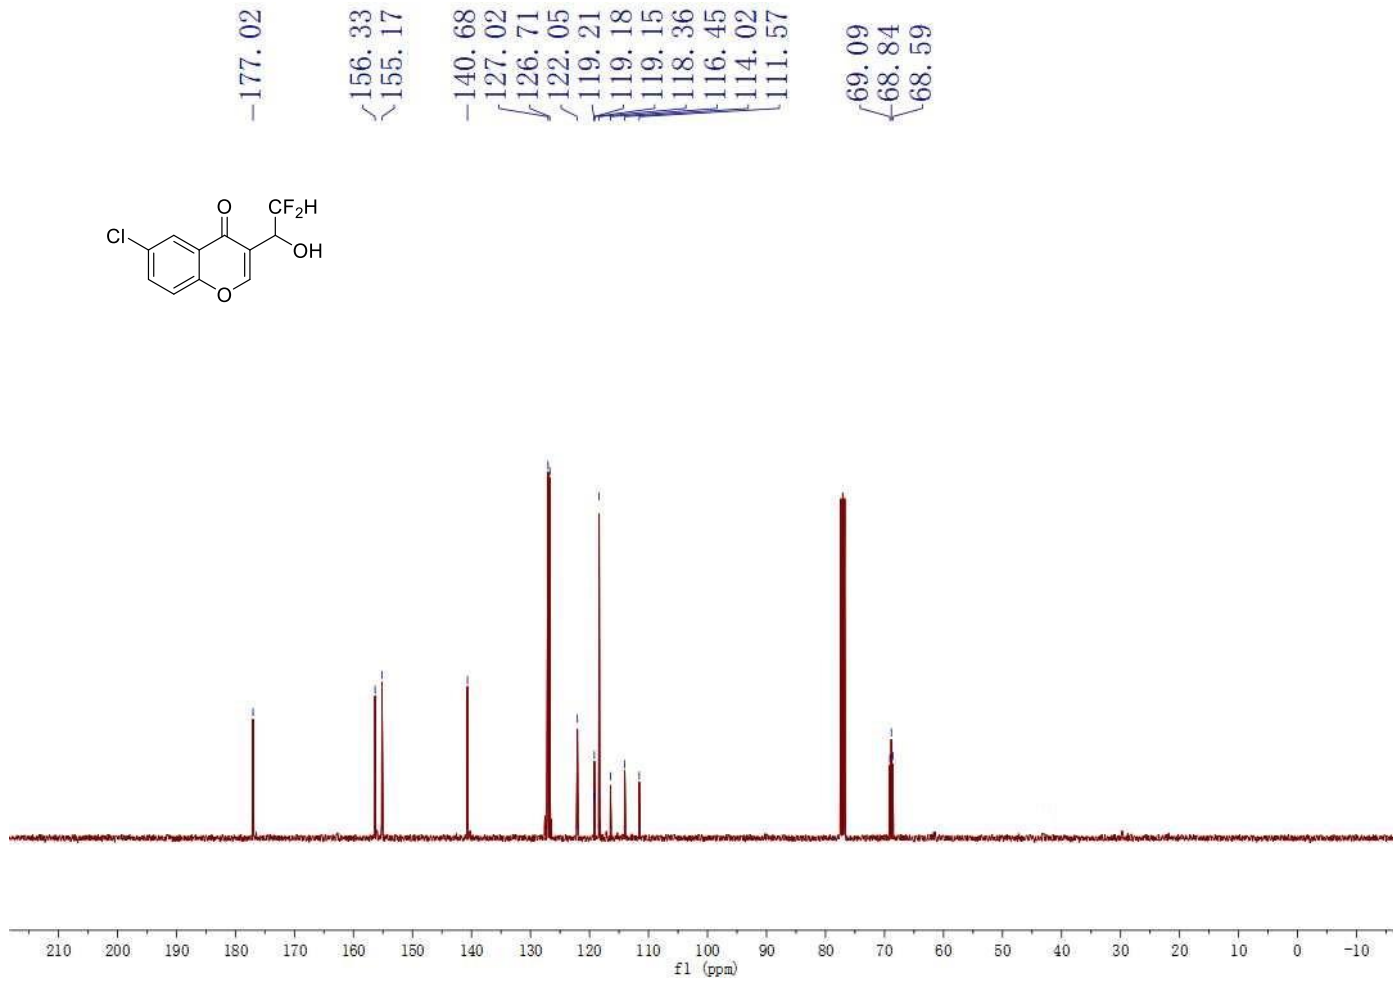

**Fig. S28.** <sup>13</sup>C NMR spectrum of compound **3i**

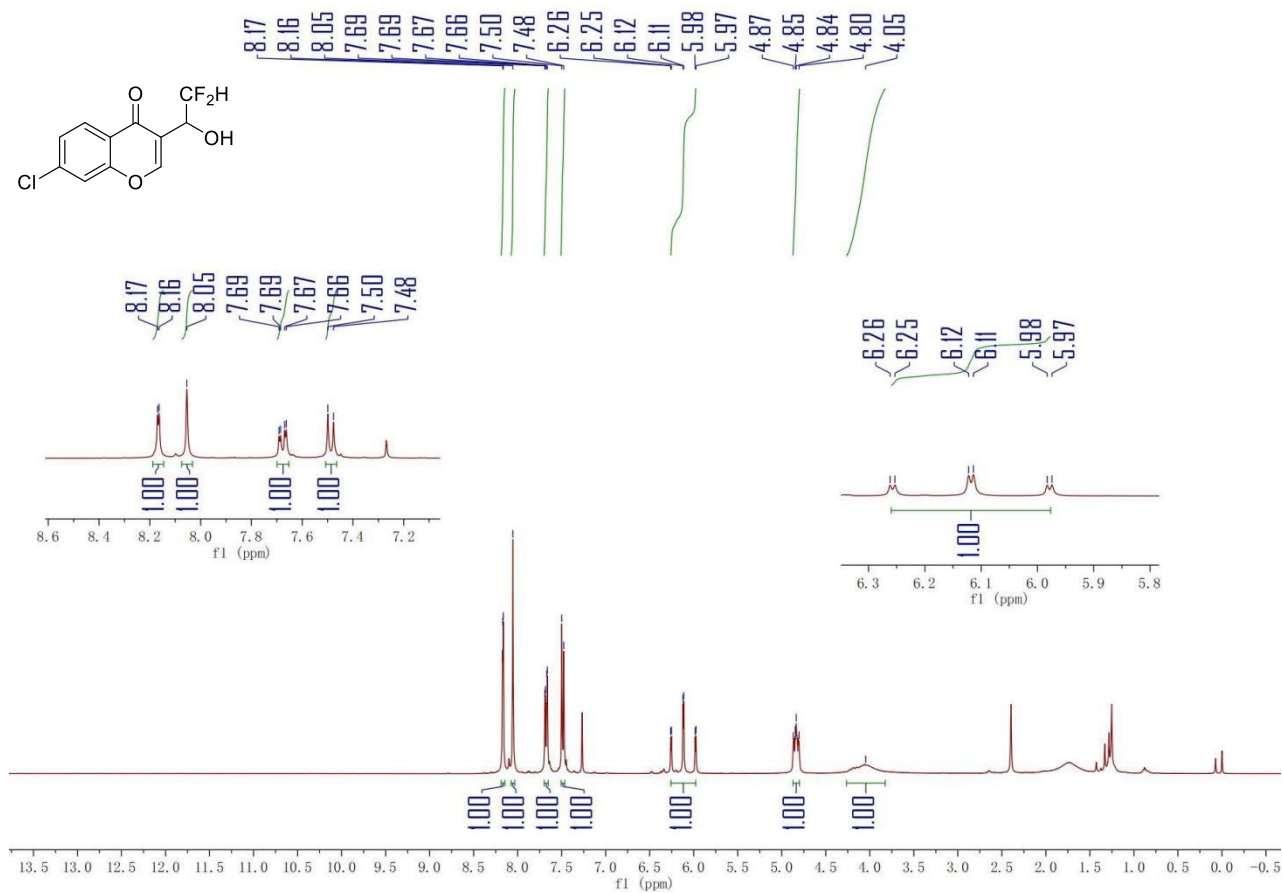

**Fig. S29.** <sup>1</sup>H NMR spectrum of compound **3j**

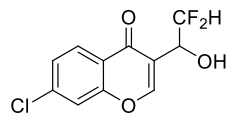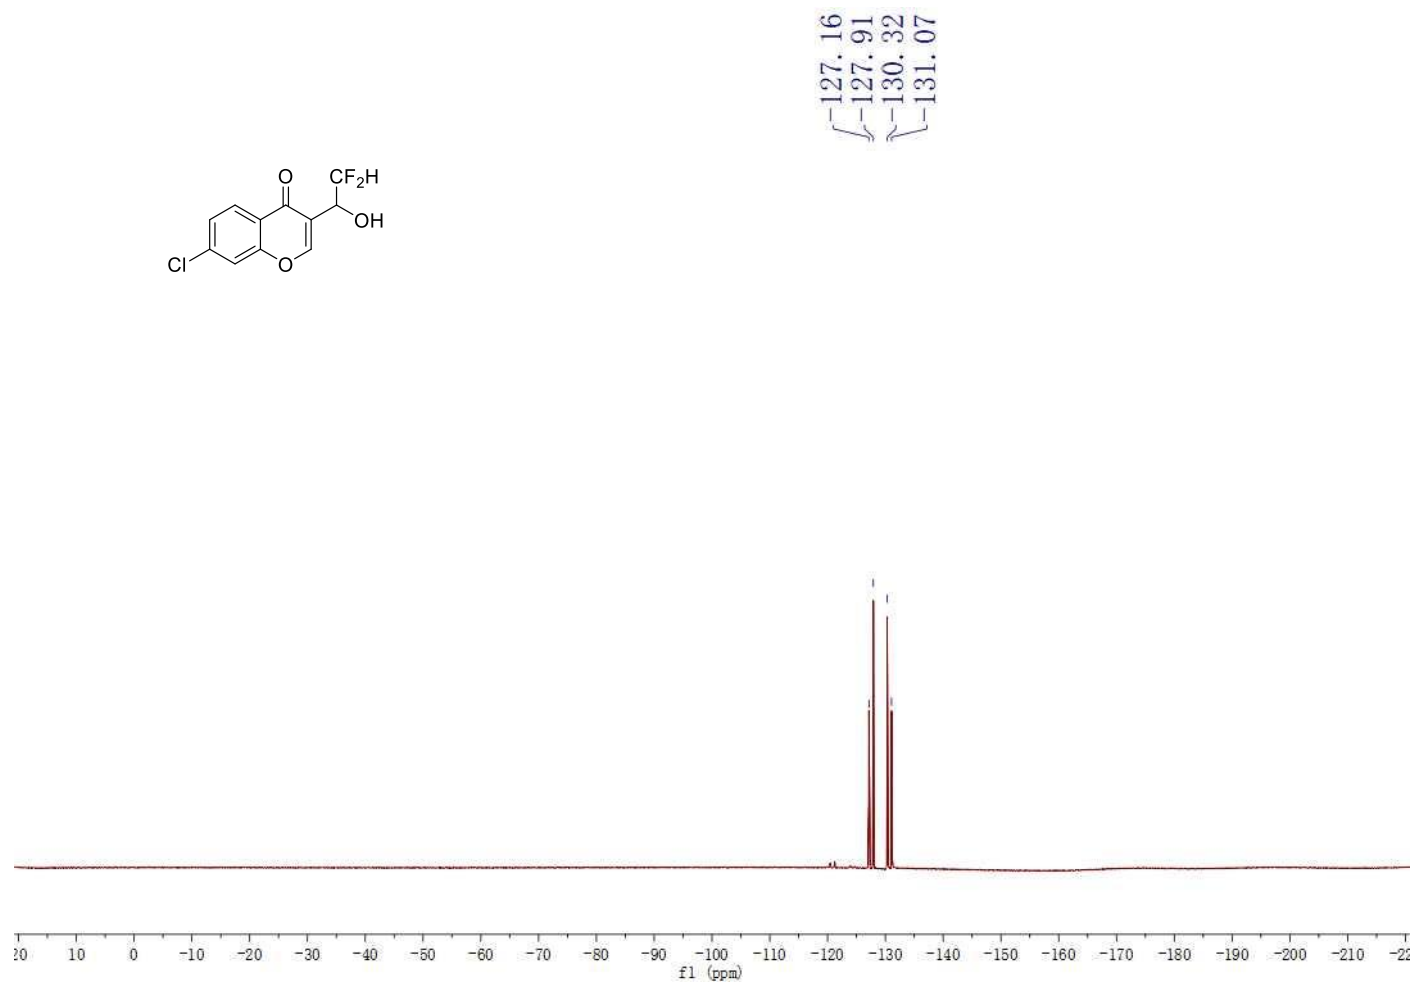

**Fig. S30.** <sup>19</sup>F NMR spectrum of compound 3j

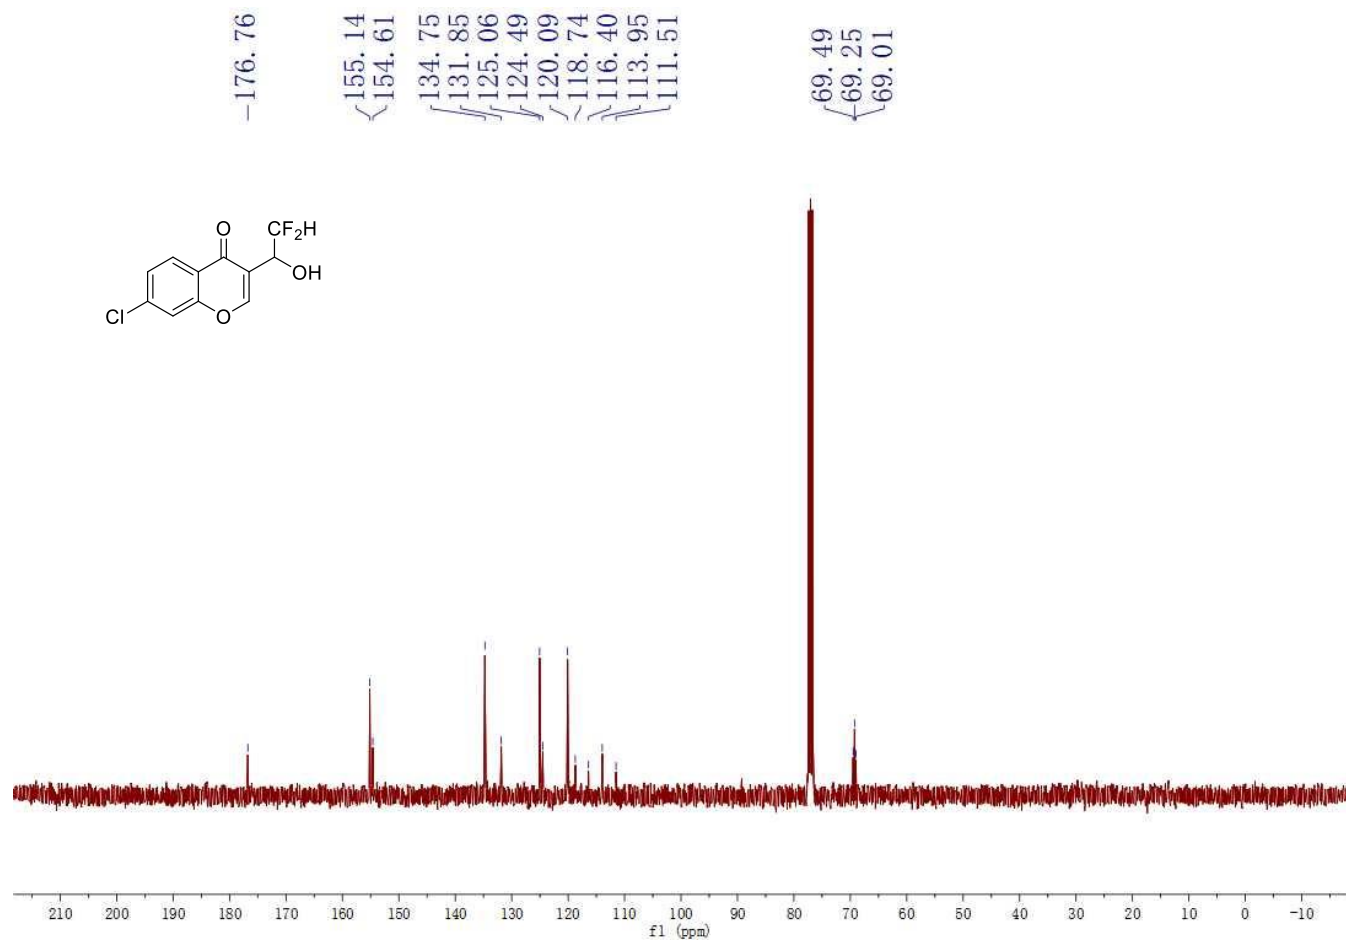

Fig. S31. <sup>13</sup>C NMR spectrum of compound 3j

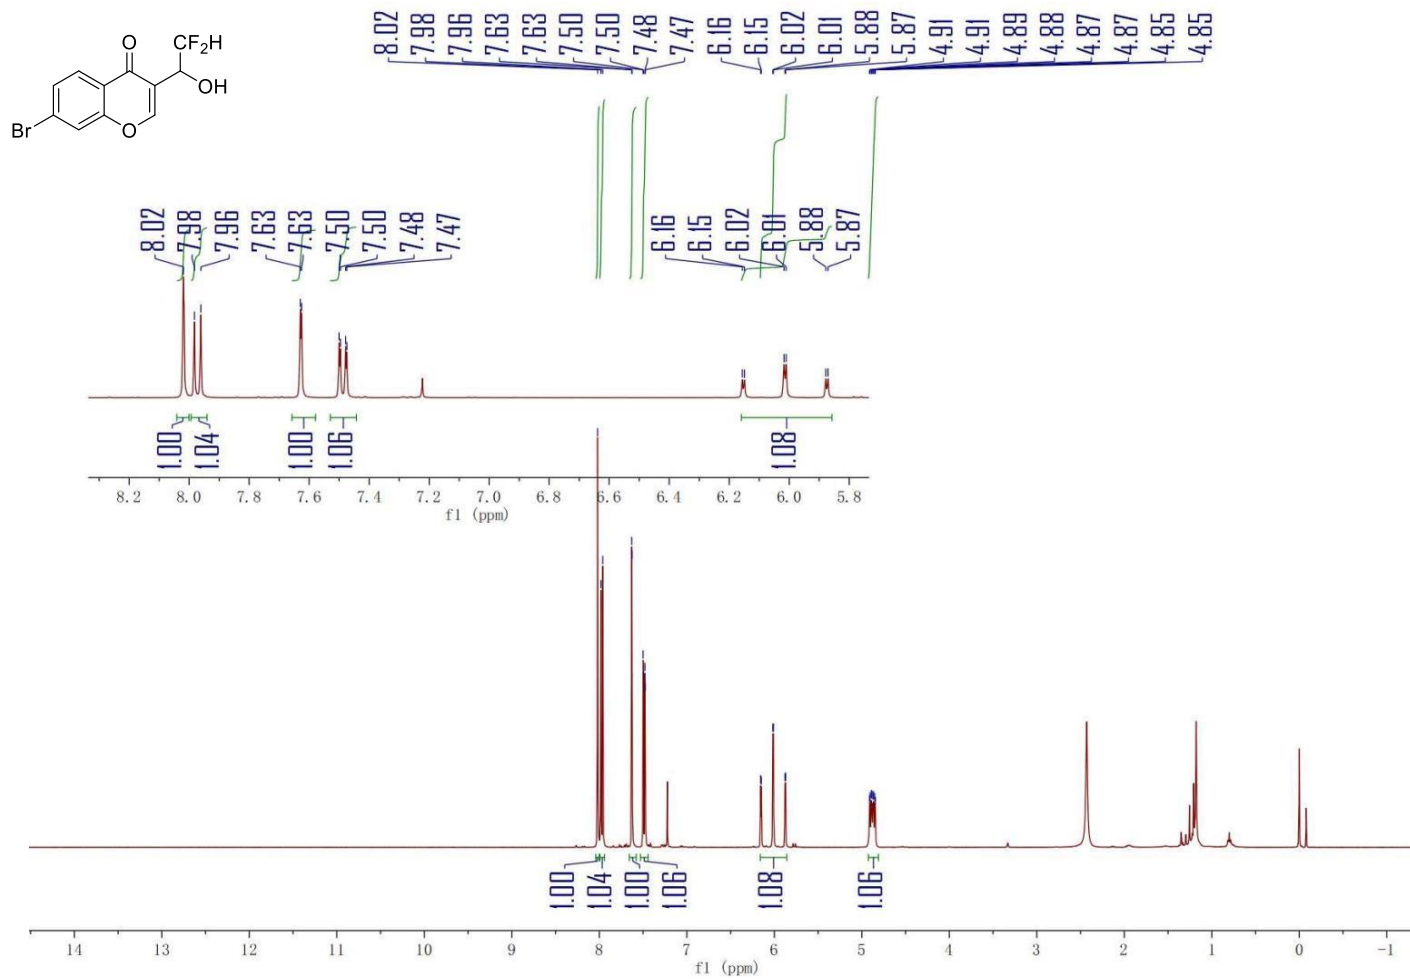

Fig. S32. <sup>1</sup>H NMR spectrum of compound **3k**

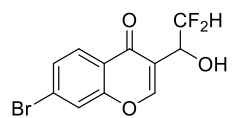

127.17  
127.92  
130.38  
131.13

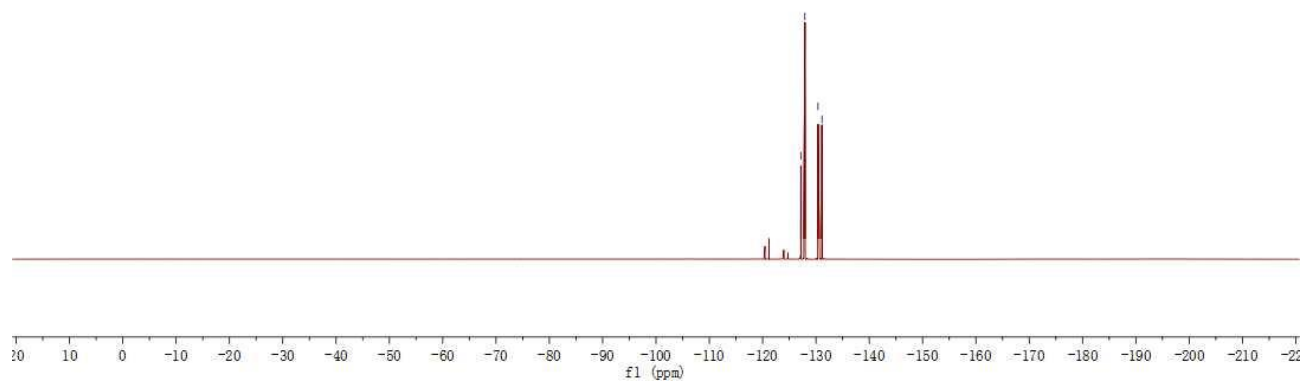

**Fig. S33.**  $^{19}\text{F}$  NMR spectrum of compound 3k

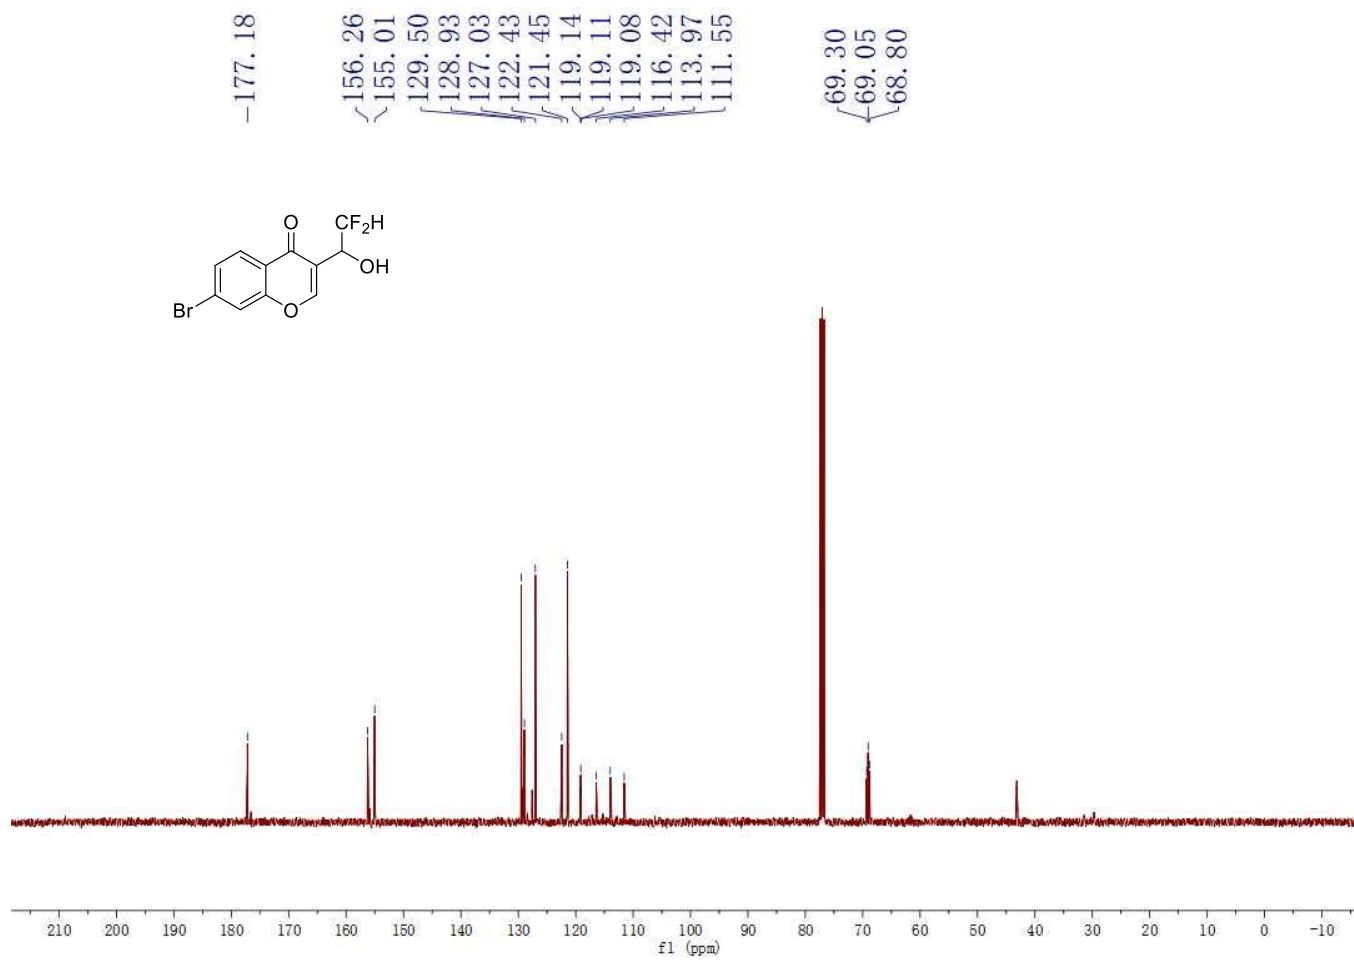

Fig. S34. <sup>1</sup>H NMR spectrum of compound 3k

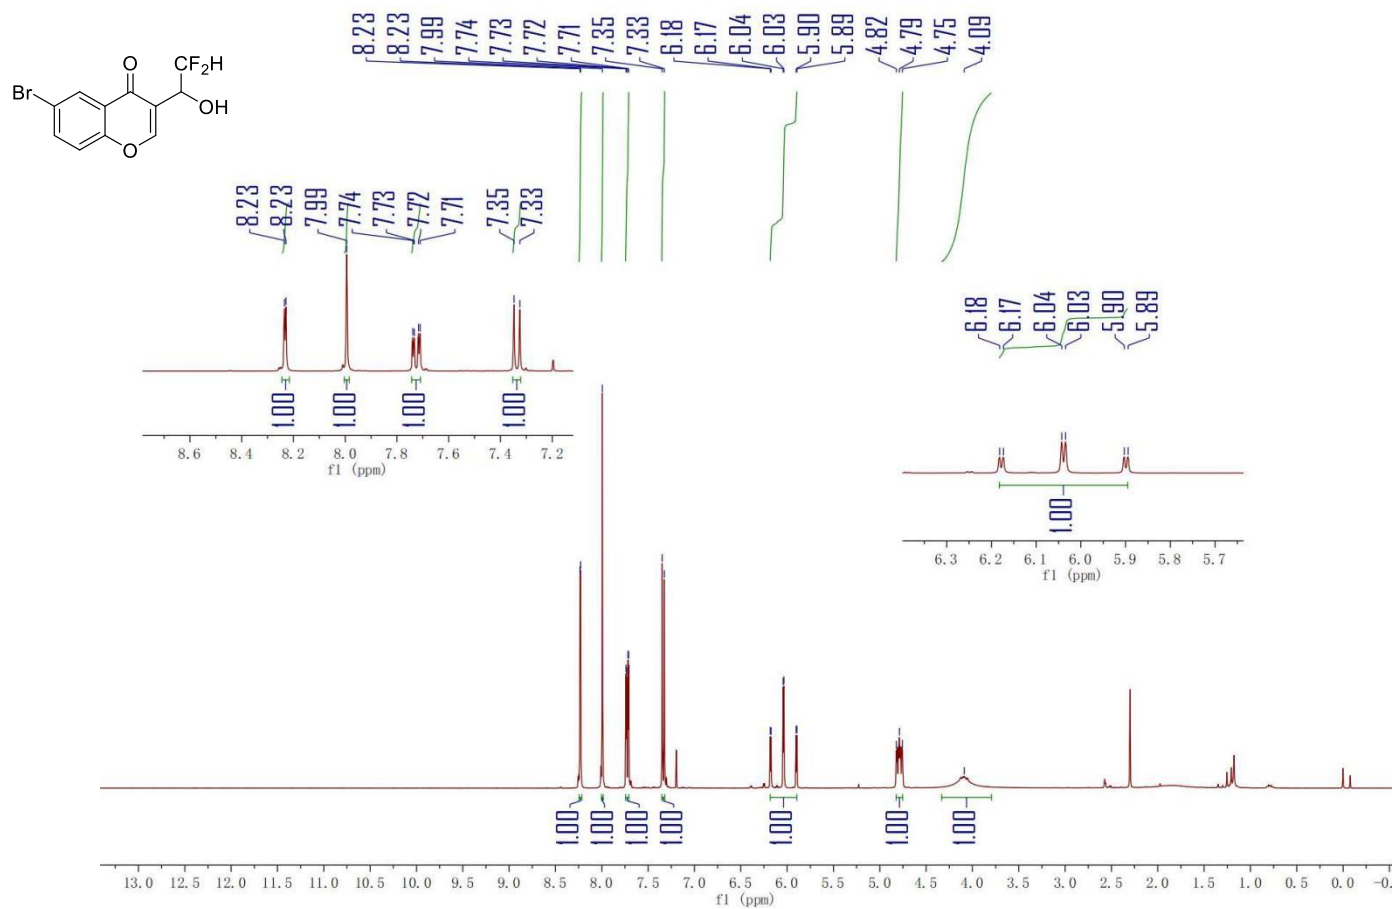

**Fig. S35.** <sup>19</sup>F NMR spectrum of compound **31**



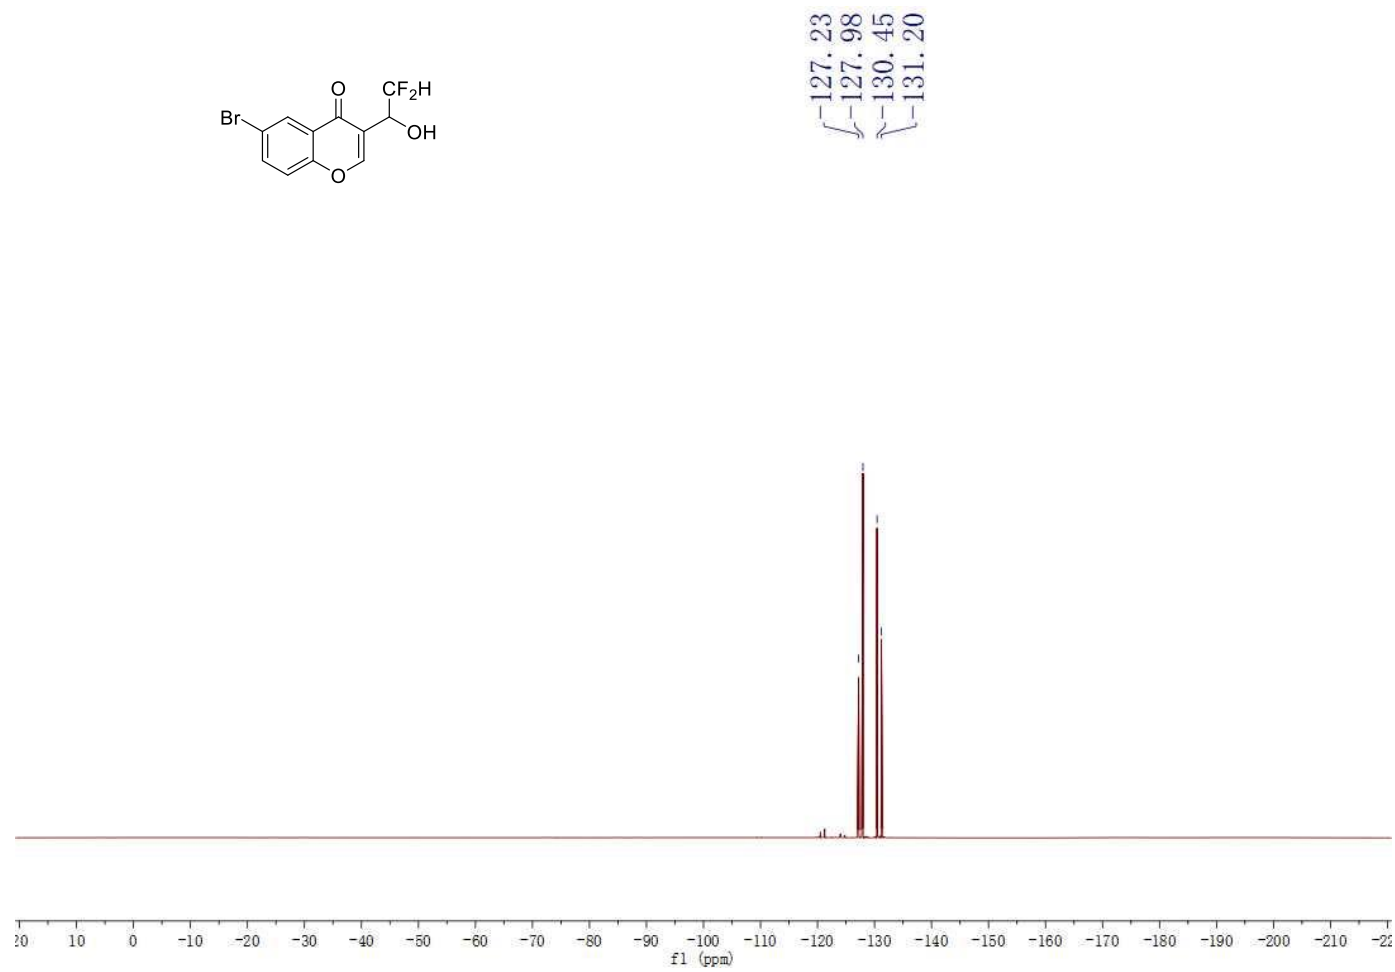

**Fig. S36.** <sup>1</sup>H NMR spectrum of compound **31**

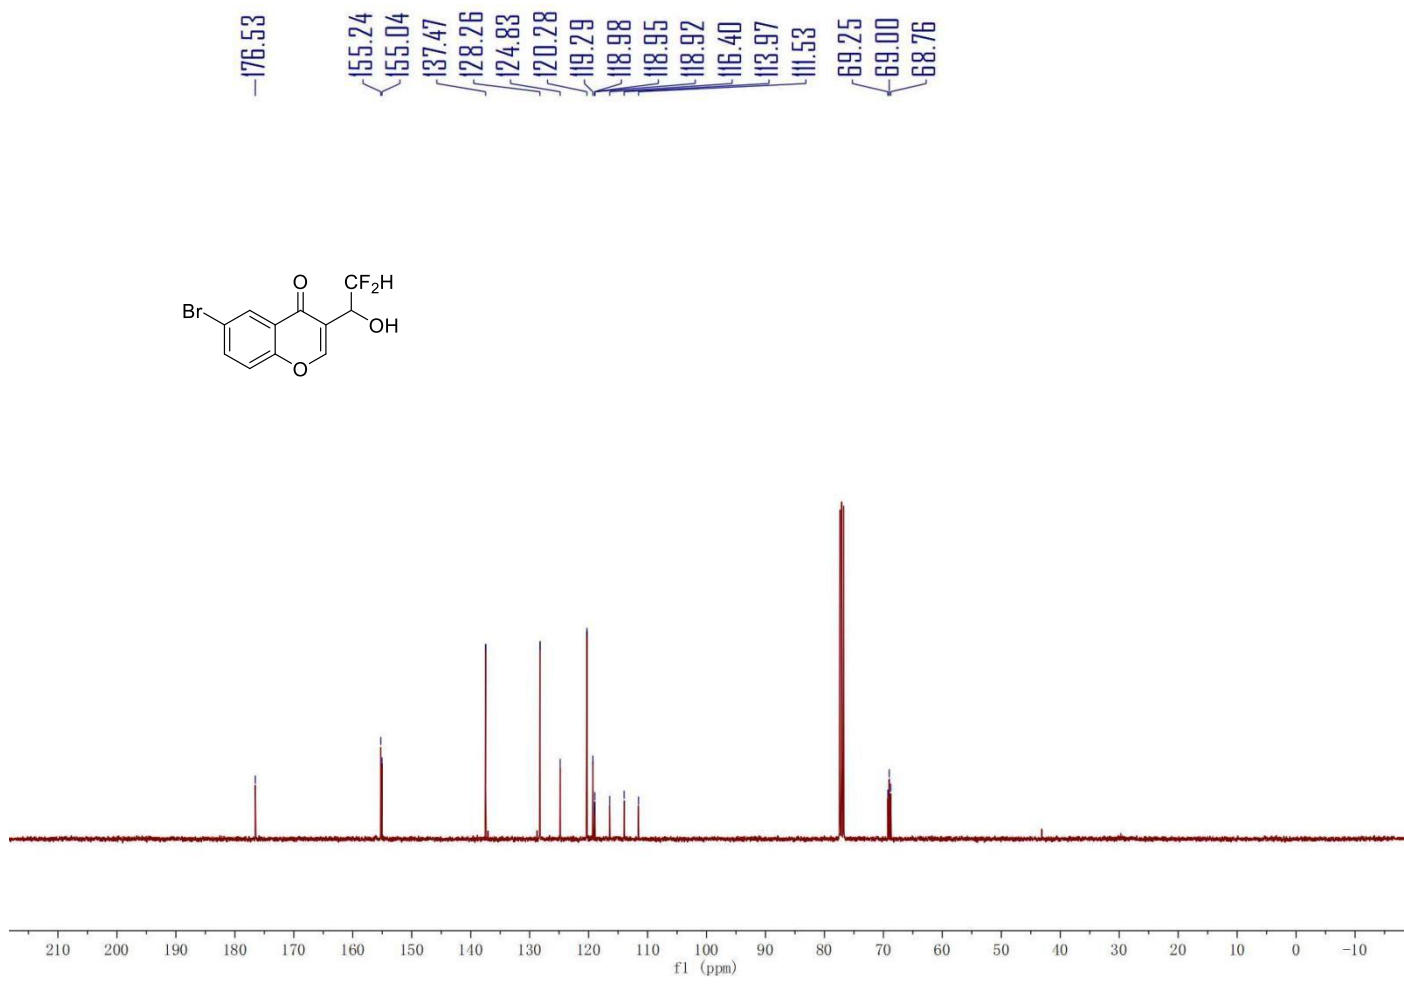

**Fig. S37.**  $^{19}\text{F}$  NMR spectrum of compound **31**

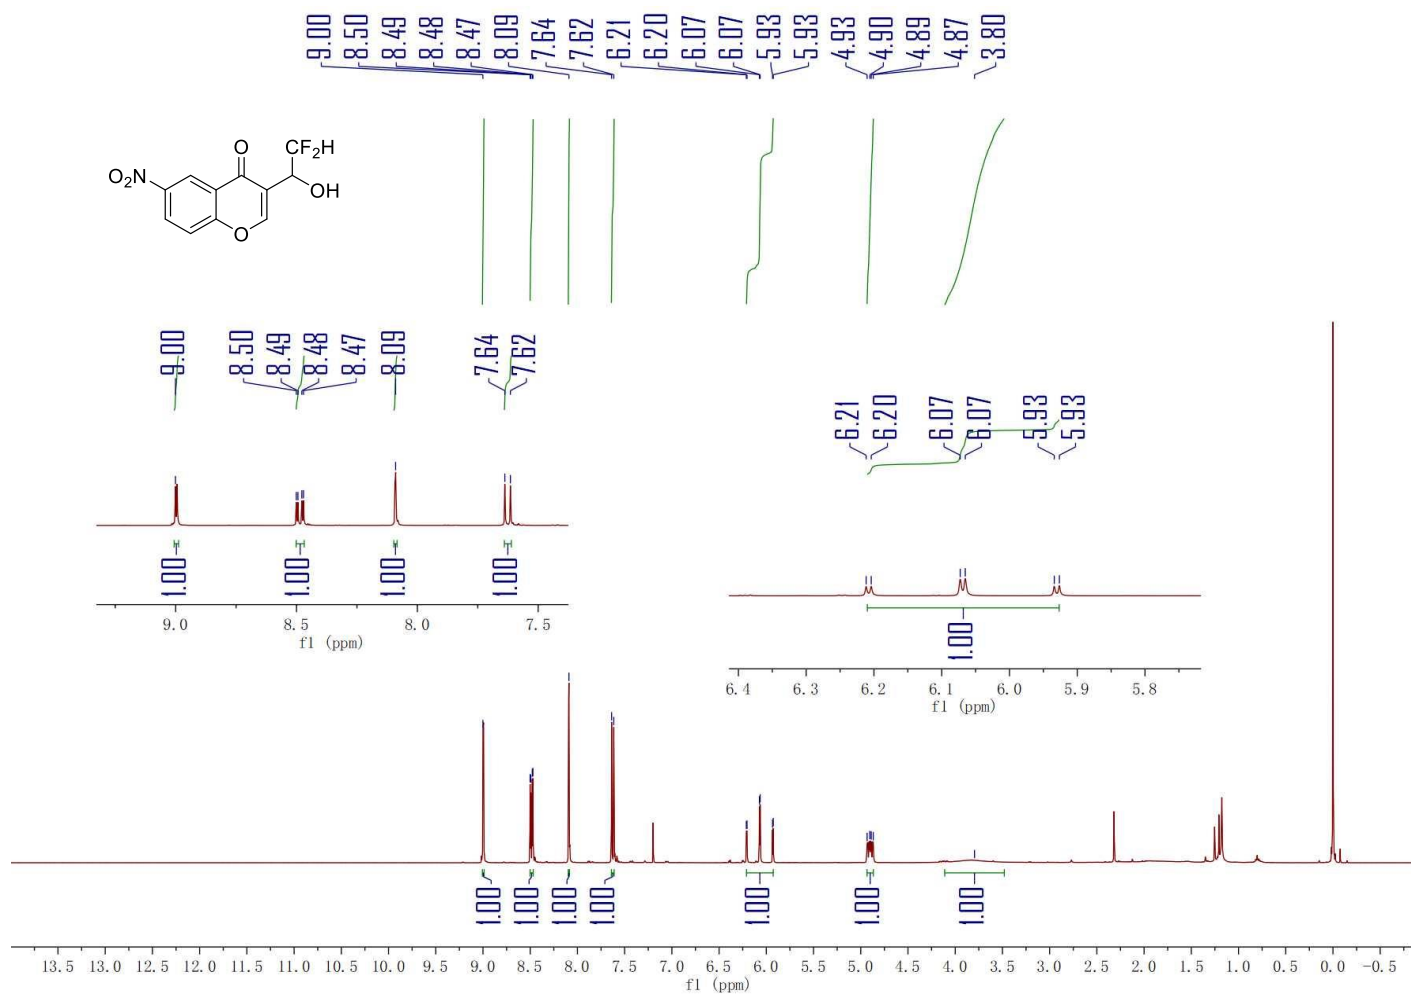

Fig. S38. <sup>13</sup>C NMR spectrum of compound 3m

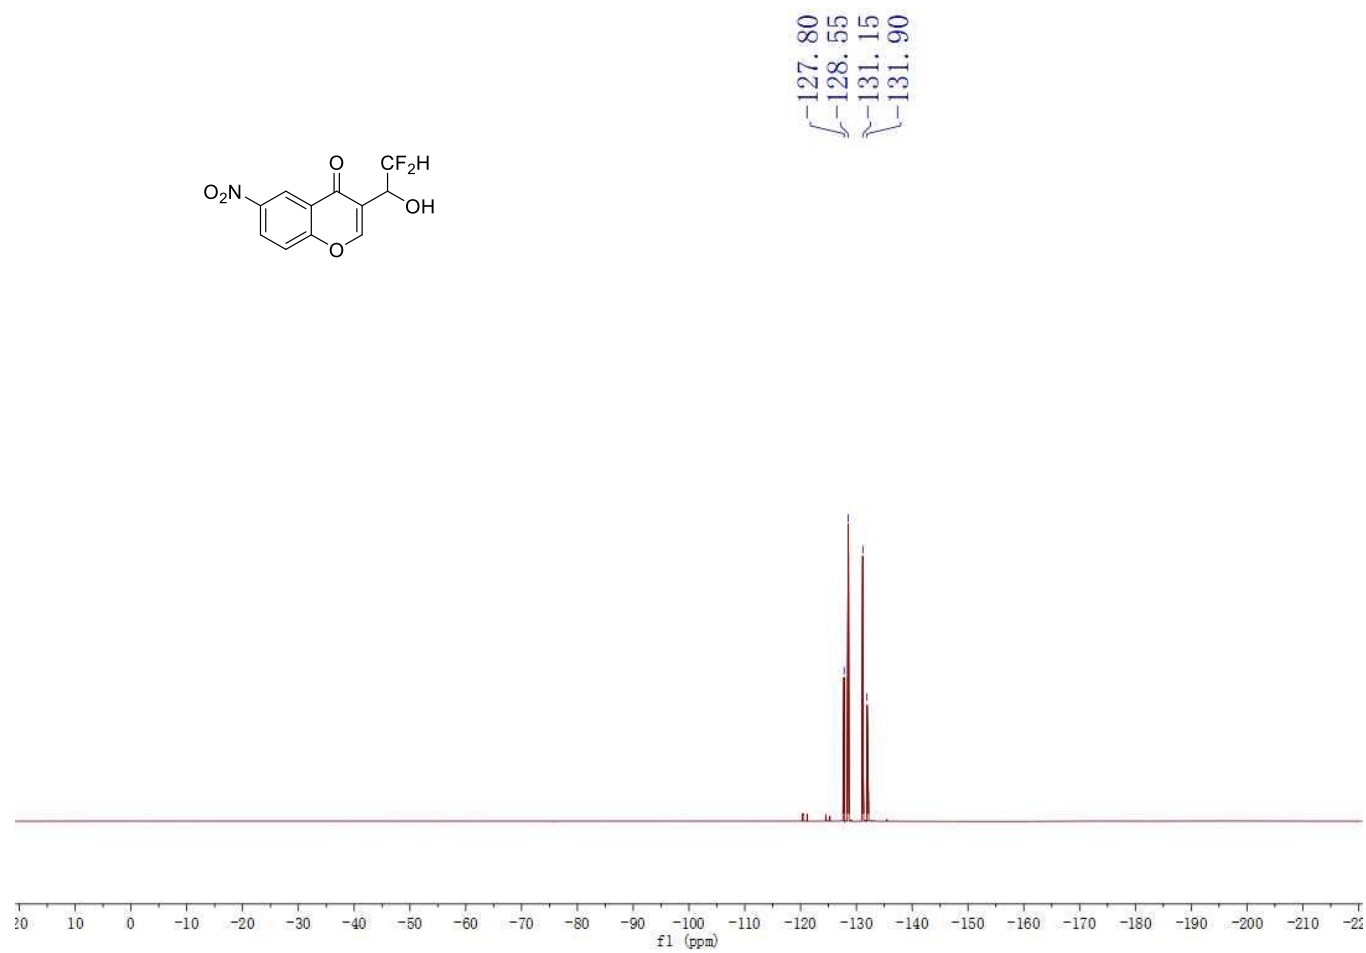

**Fig. S39.** <sup>1</sup>H NMR spectrum of compound **3m**

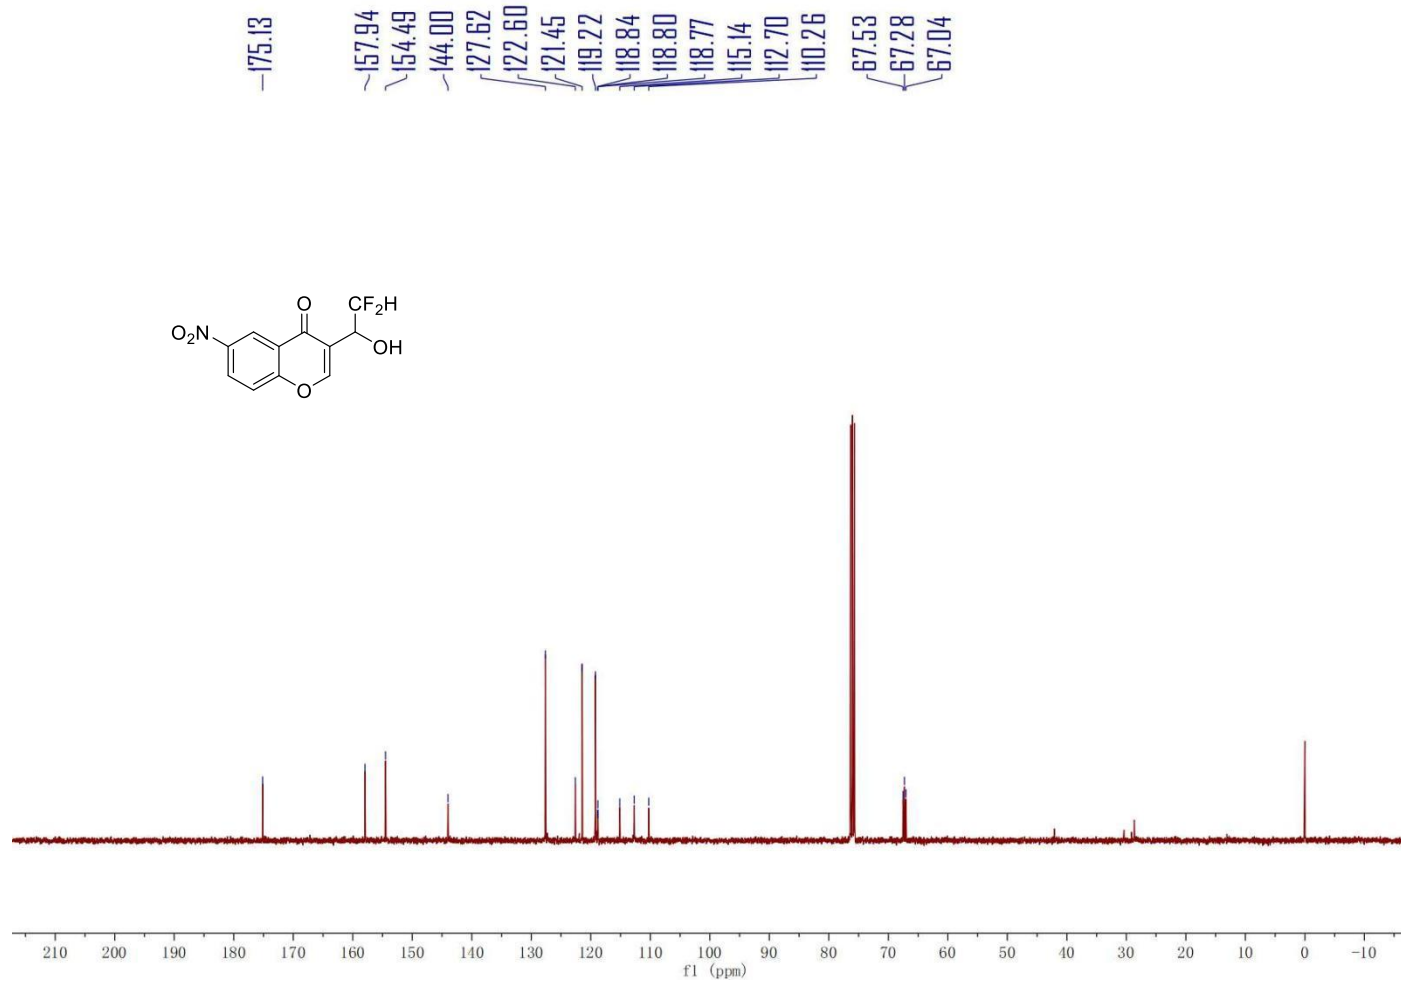

**Fig. S40.**  $^{19}\text{F}$  NMR spectrum of compound **3m**

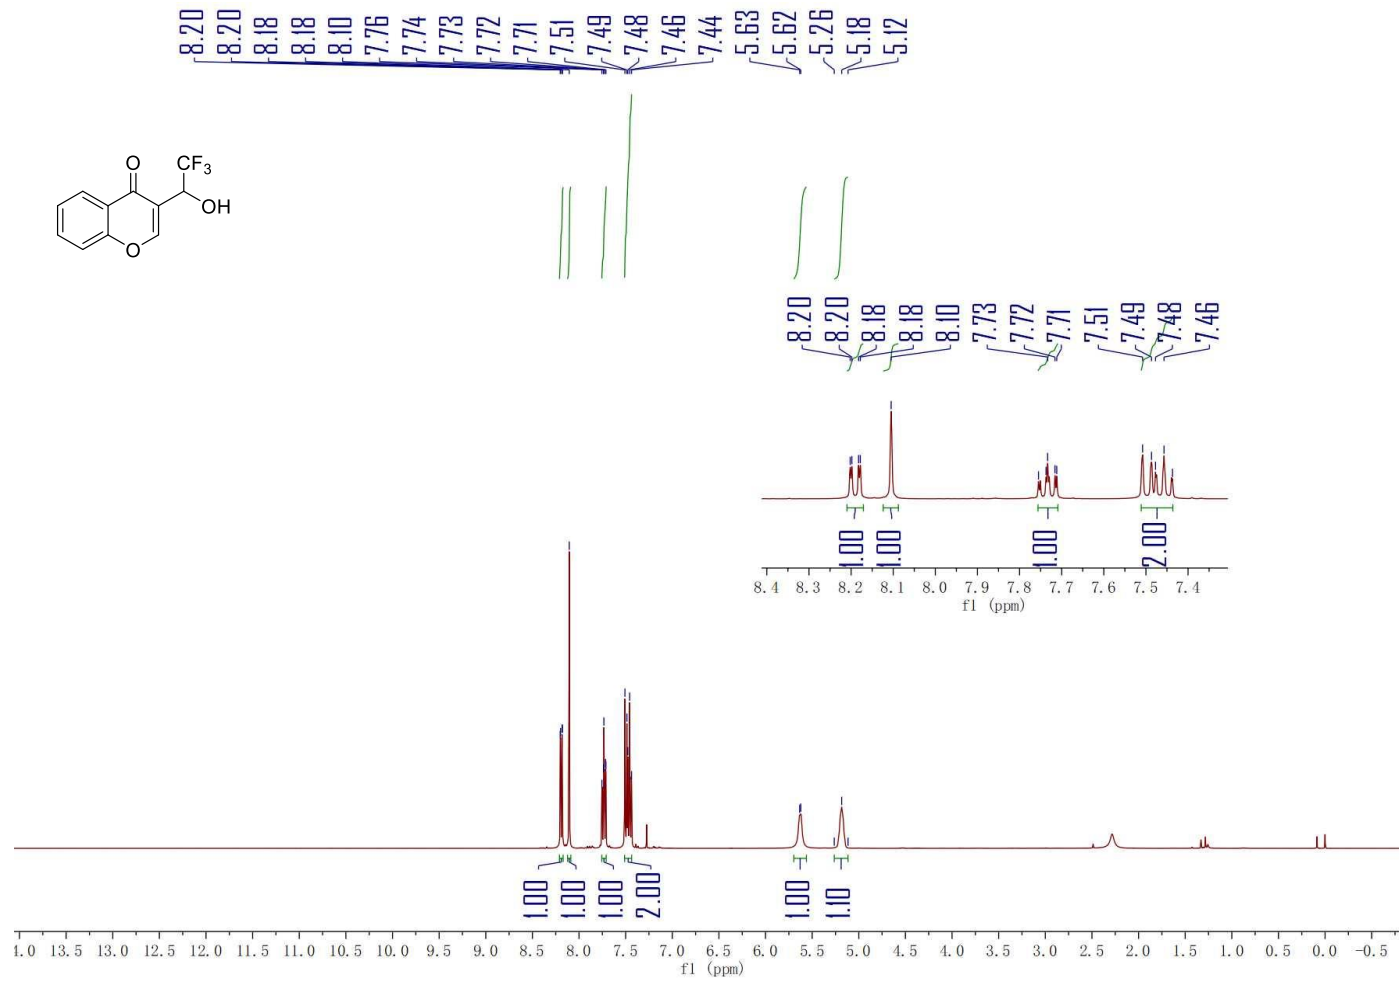

Fig. S41. <sup>1</sup>H NMR spectrum of compound 4a

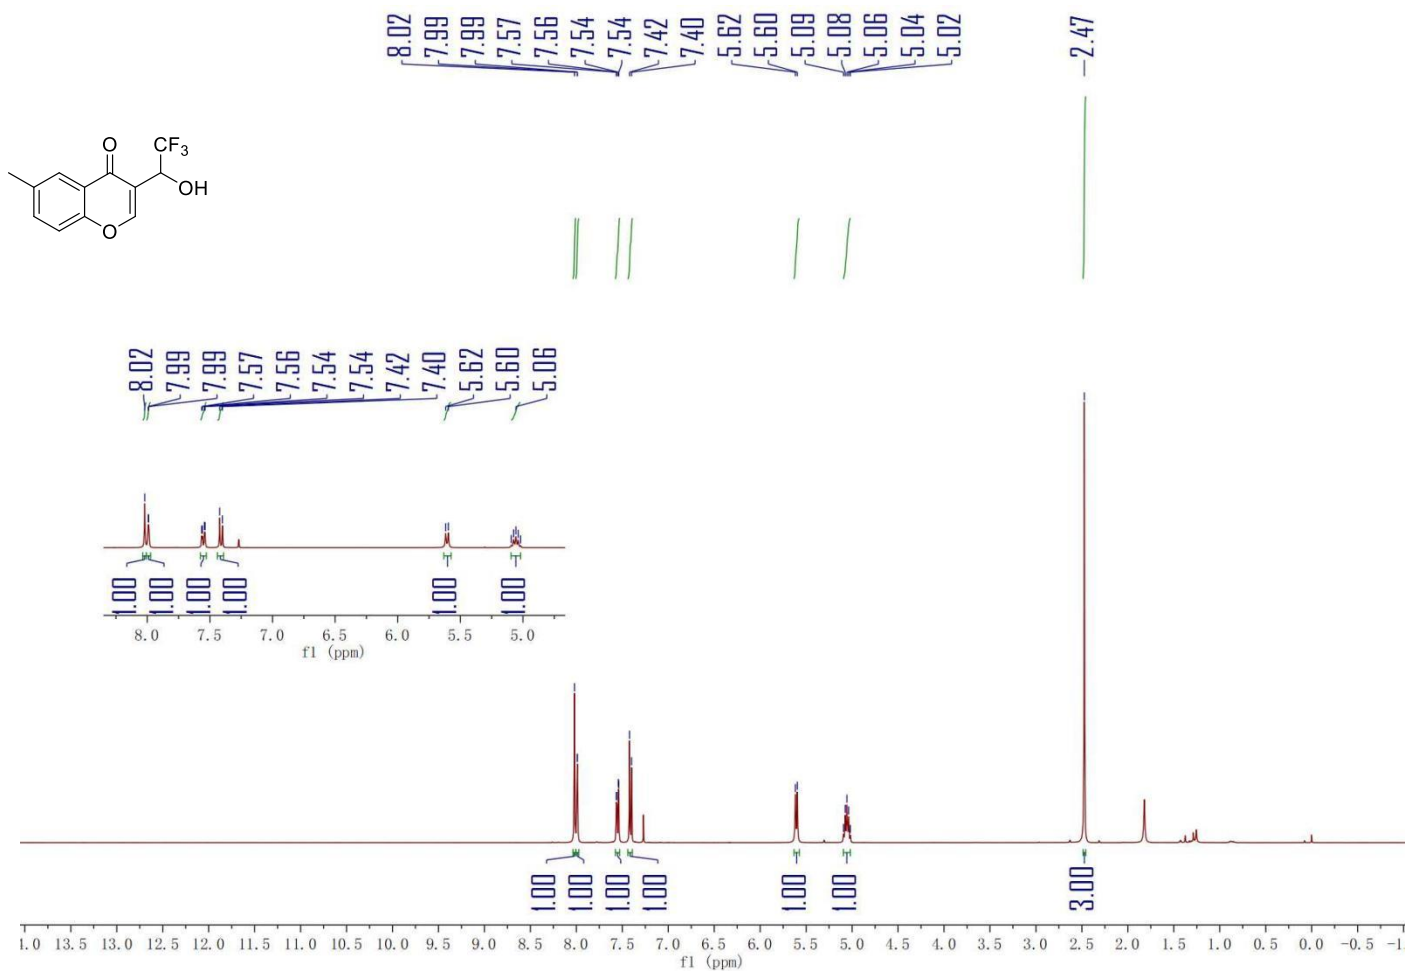

Fig. S42. <sup>1</sup>H NMR spectrum of compound **4b**

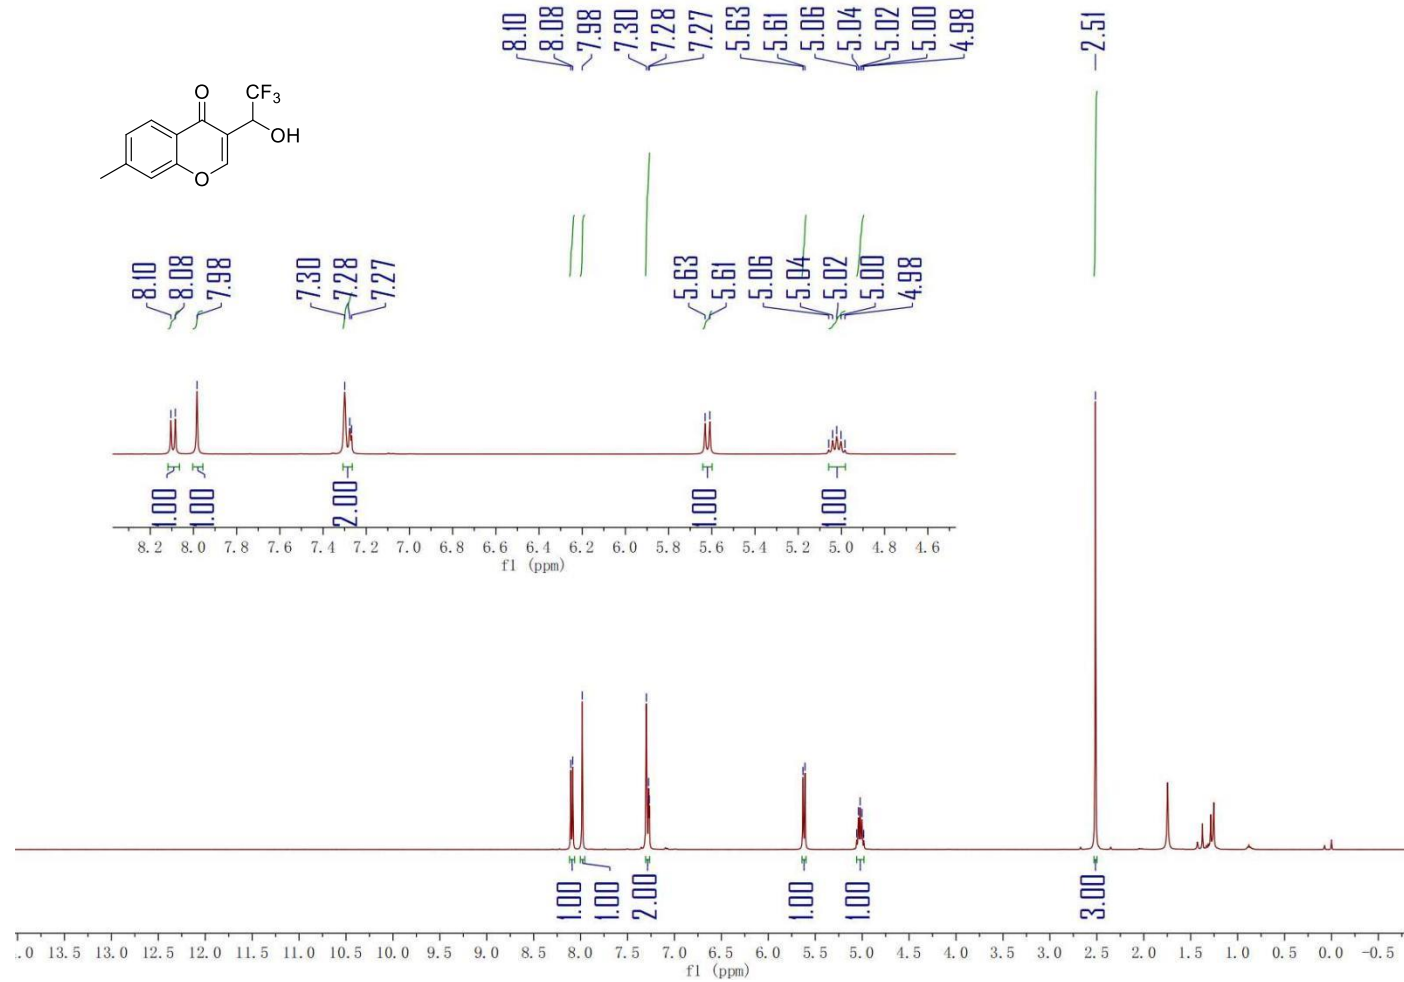

Fig. S43.  $^1\text{H}$  NMR spectrum of compound **4c**



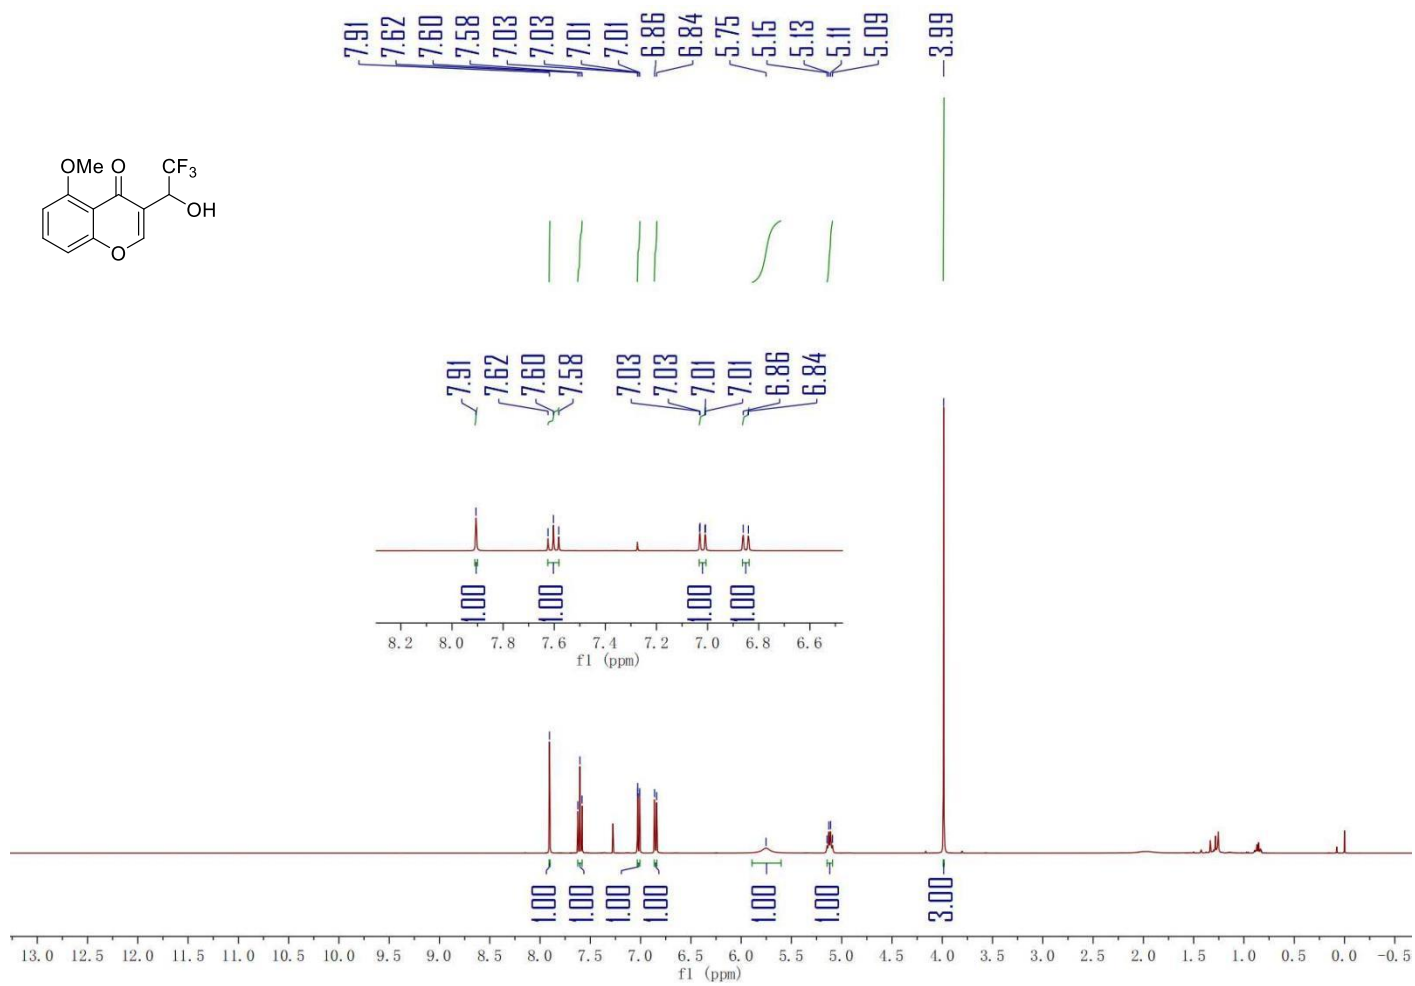

Fig. S44. <sup>1</sup>H NMR spectrum of compound **4d**

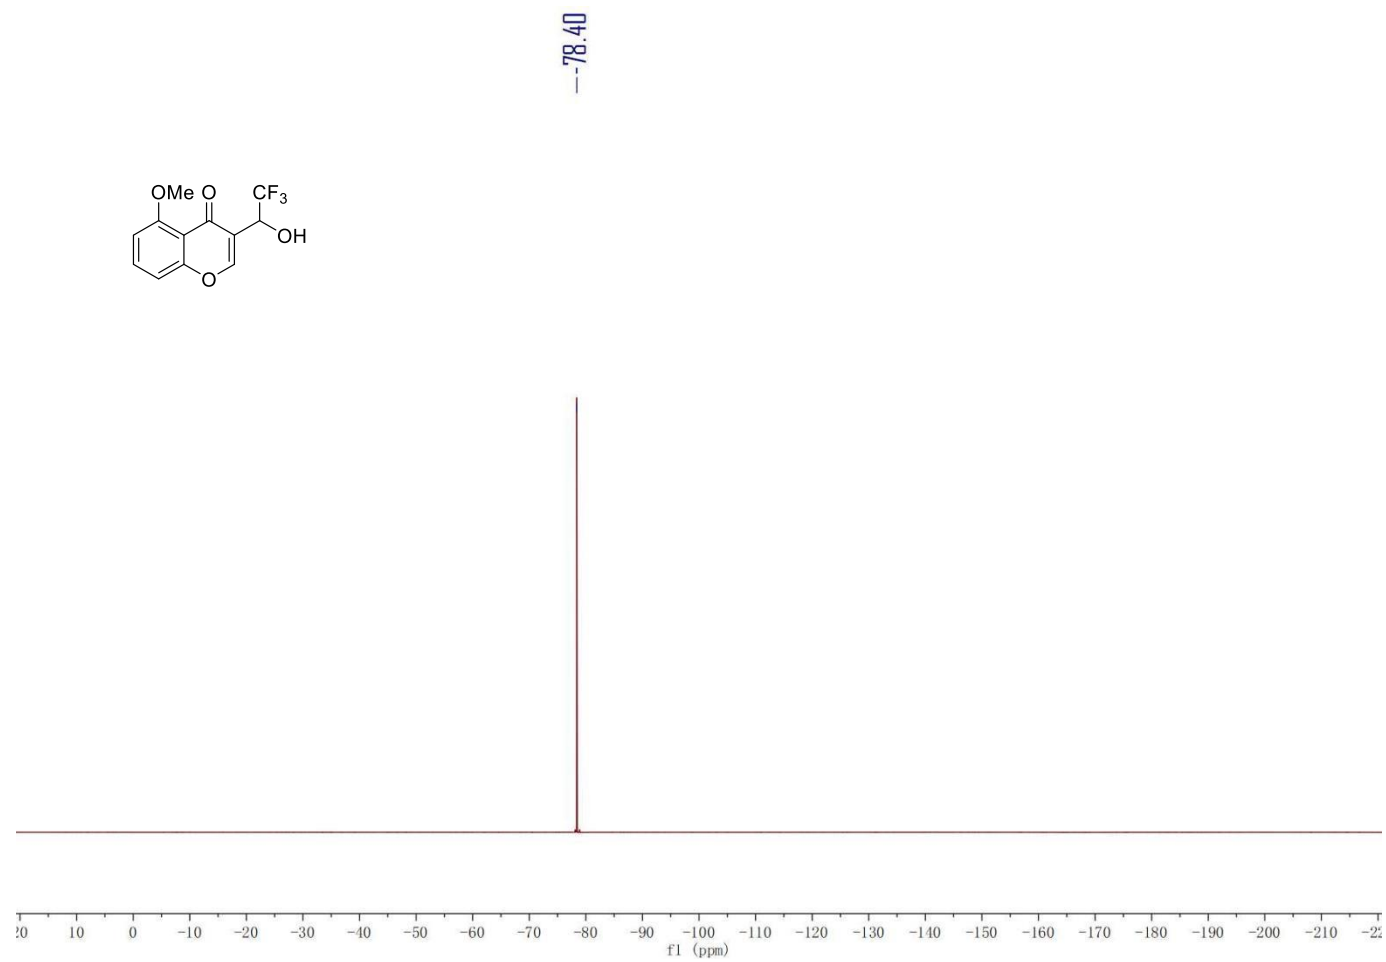

**Fig. S45.**  $^{19}\text{F}$  NMR spectrum of compound **4d**

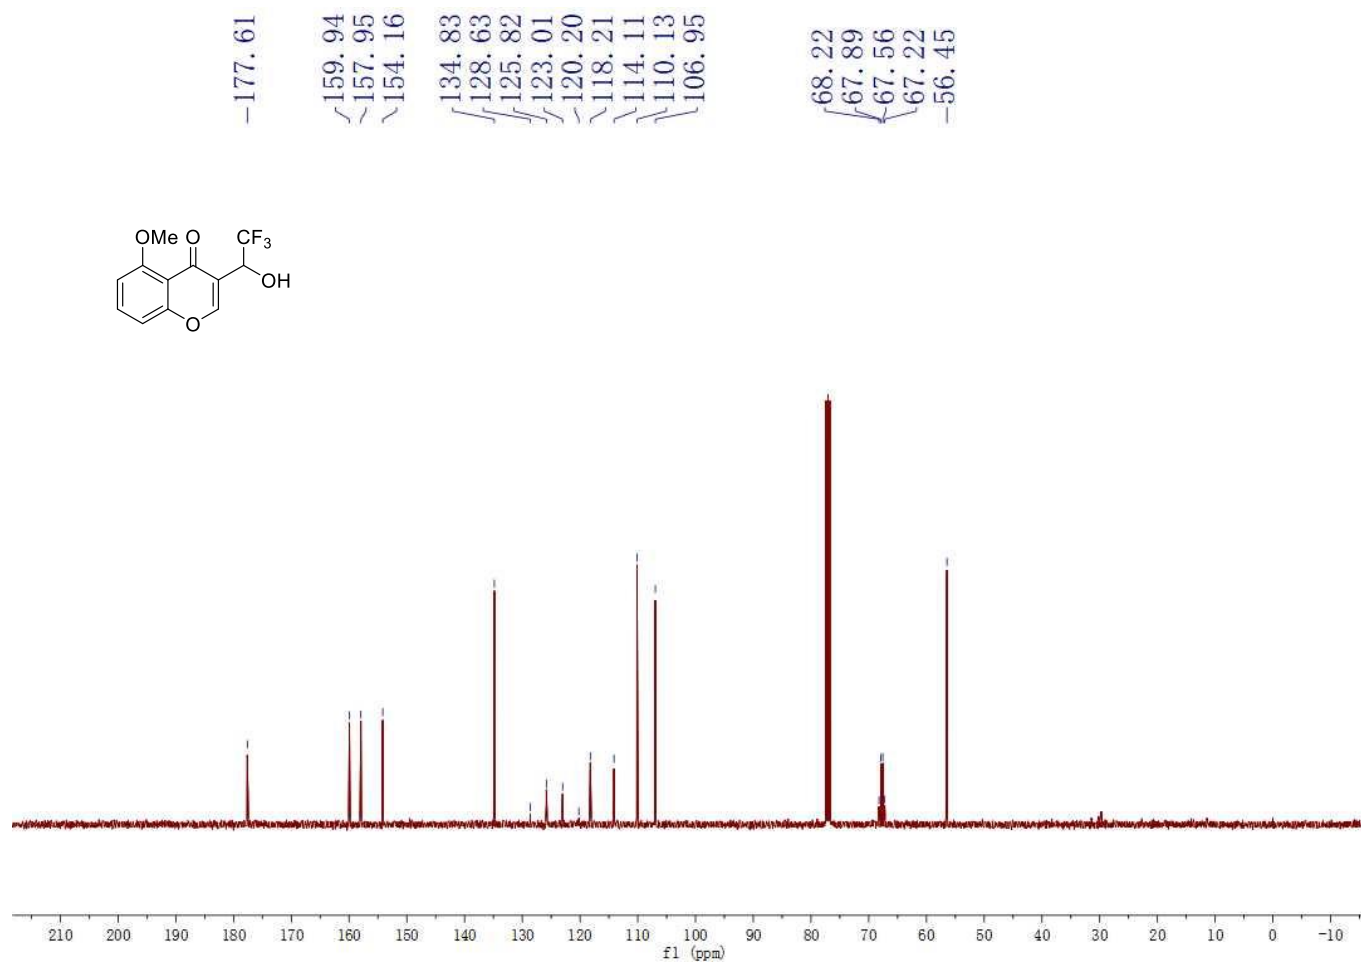

Fig. S46. <sup>13</sup>C NMR spectrum of compound 4d

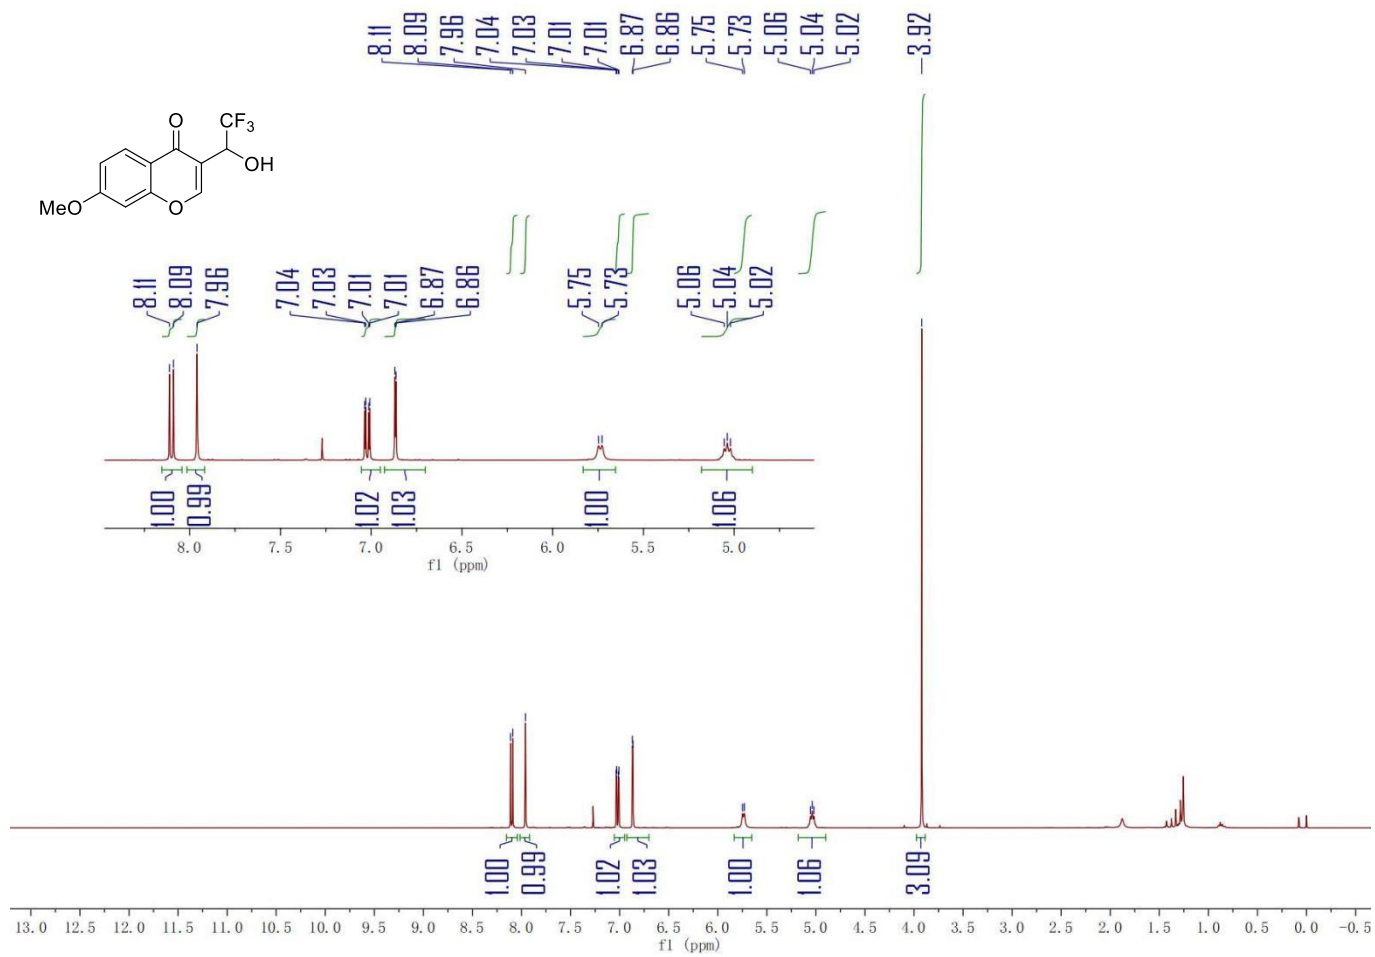

Fig. S47. <sup>1</sup>H NMR spectrum of compound 4e

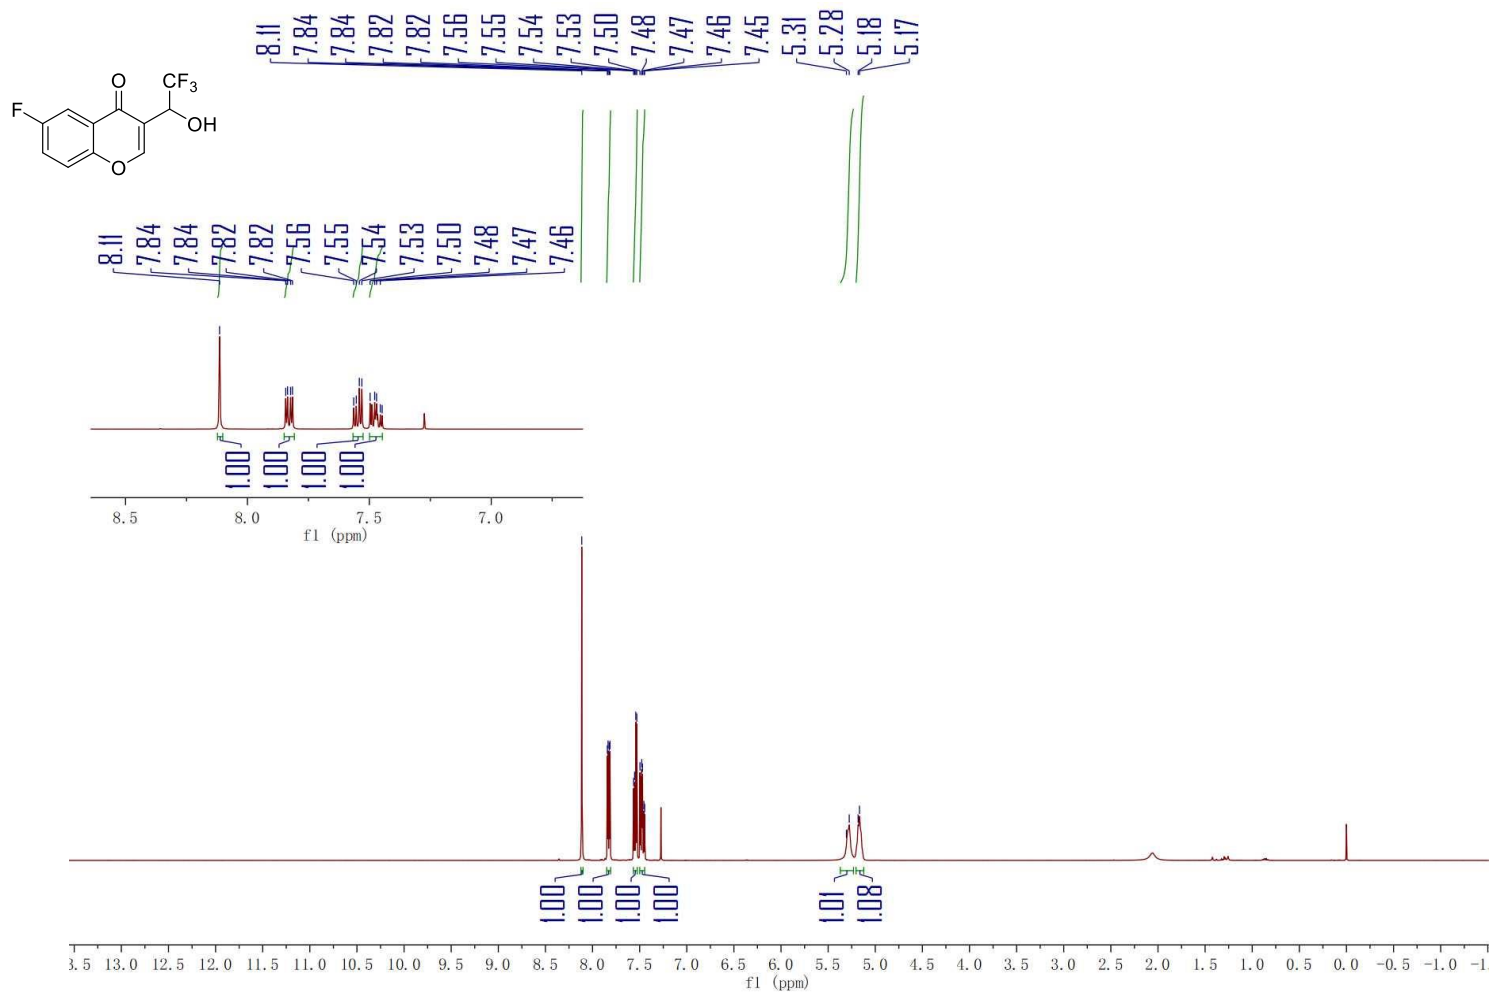

Fig. S48. <sup>1</sup>H NMR spectrum of compound **4f**

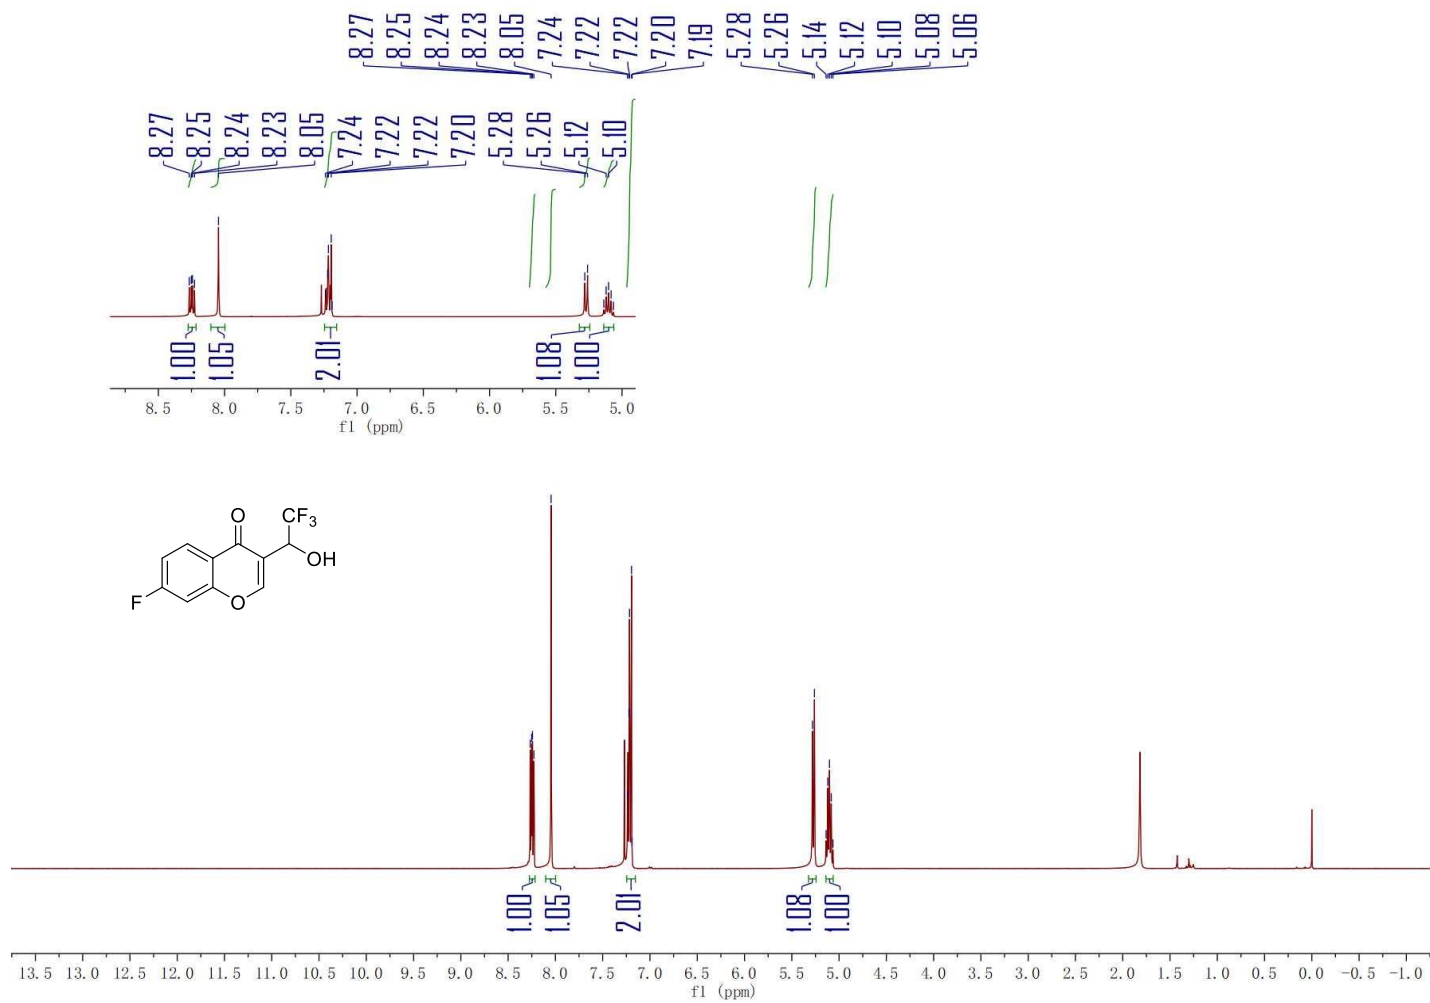

**Fig. S49.**  $^1\text{H}$  NMR spectrum of compound **4g**

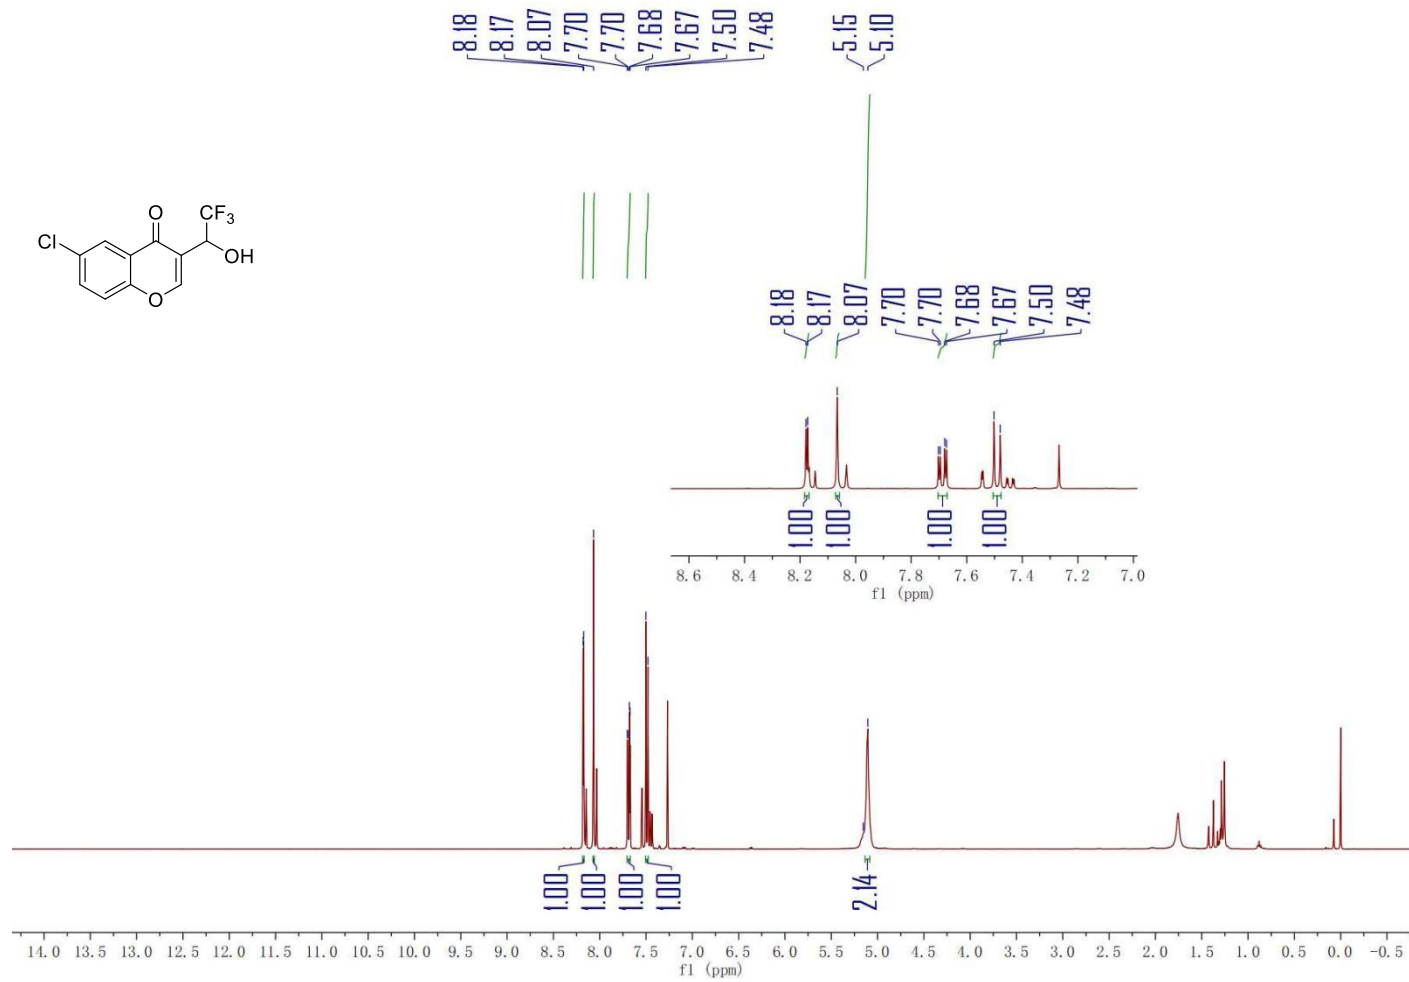

**Fig. S50.** <sup>1</sup>H NMR spectrum of compound **4h**

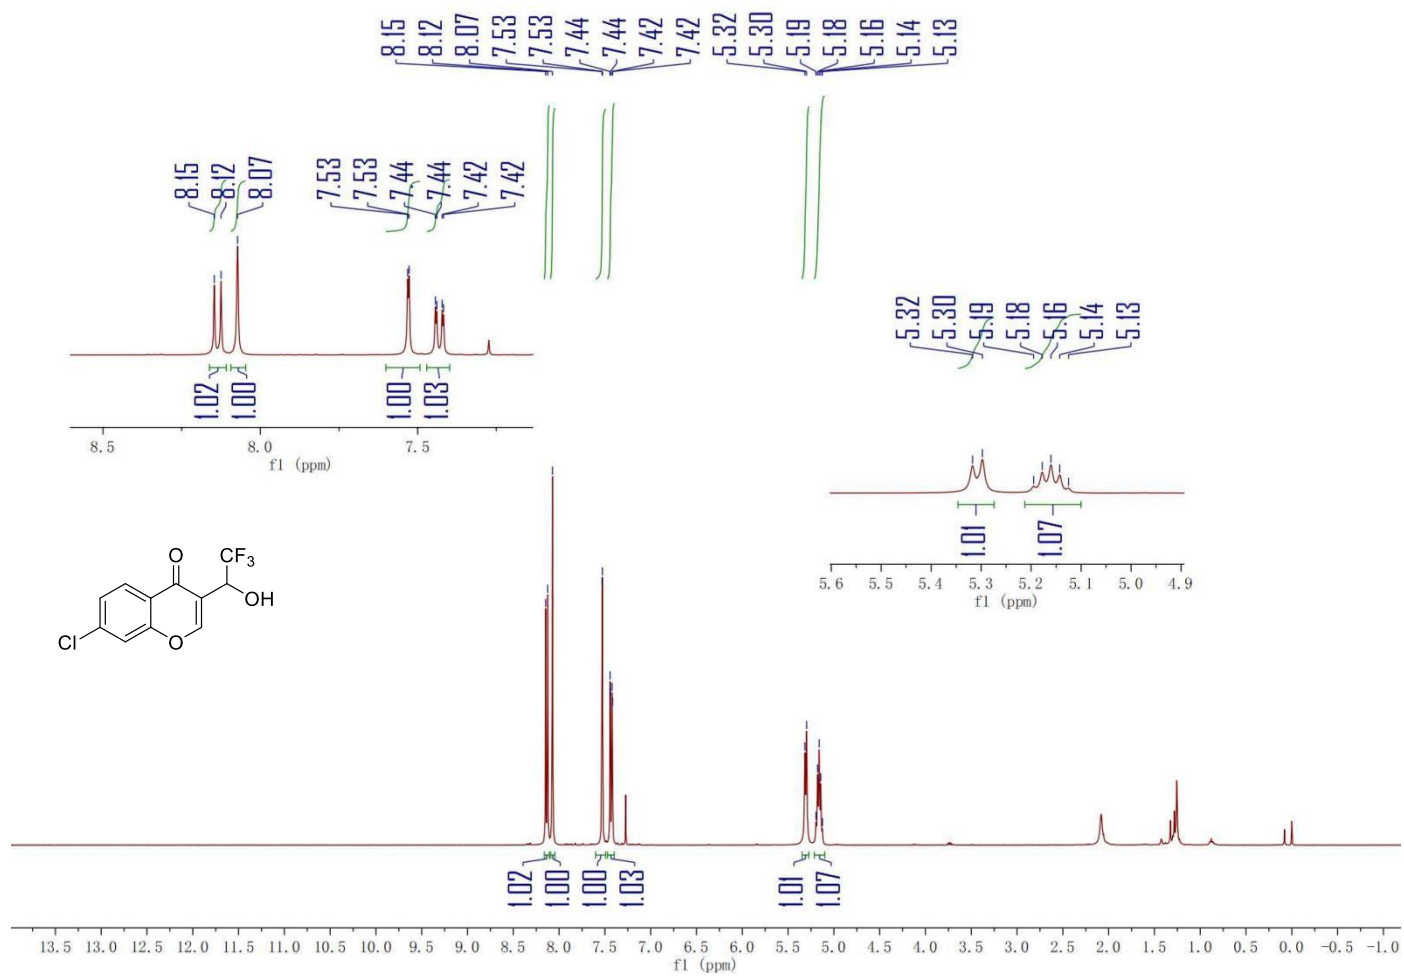

Fig. S51. <sup>1</sup>H NMR spectrum of compound 4i



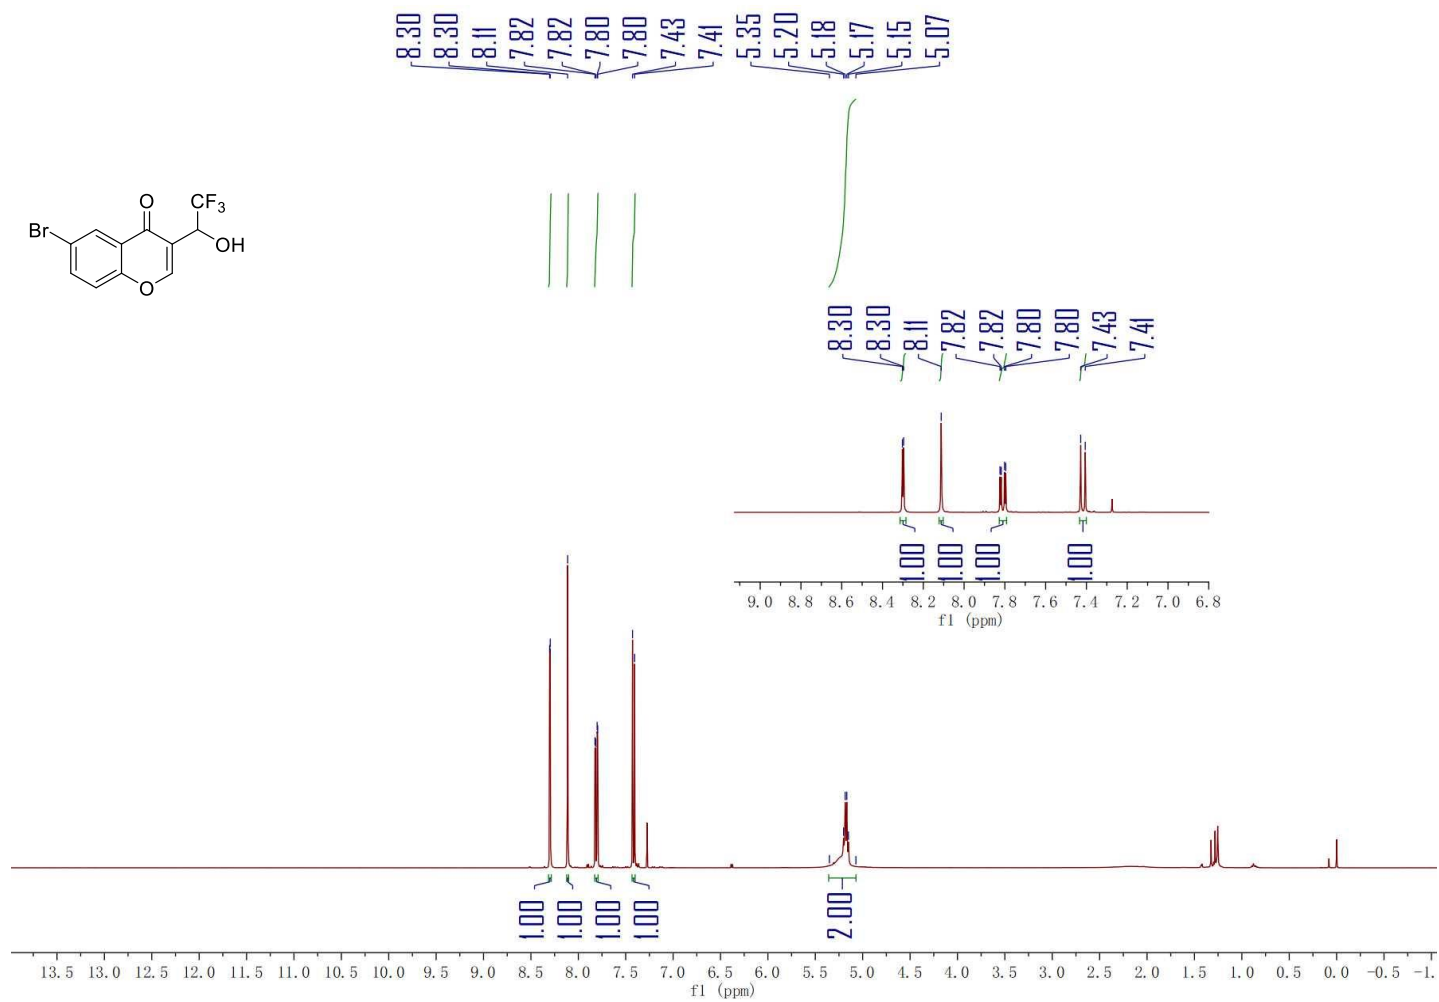

**Fig. S52.** <sup>1</sup>H NMR spectrum of compound **4j**

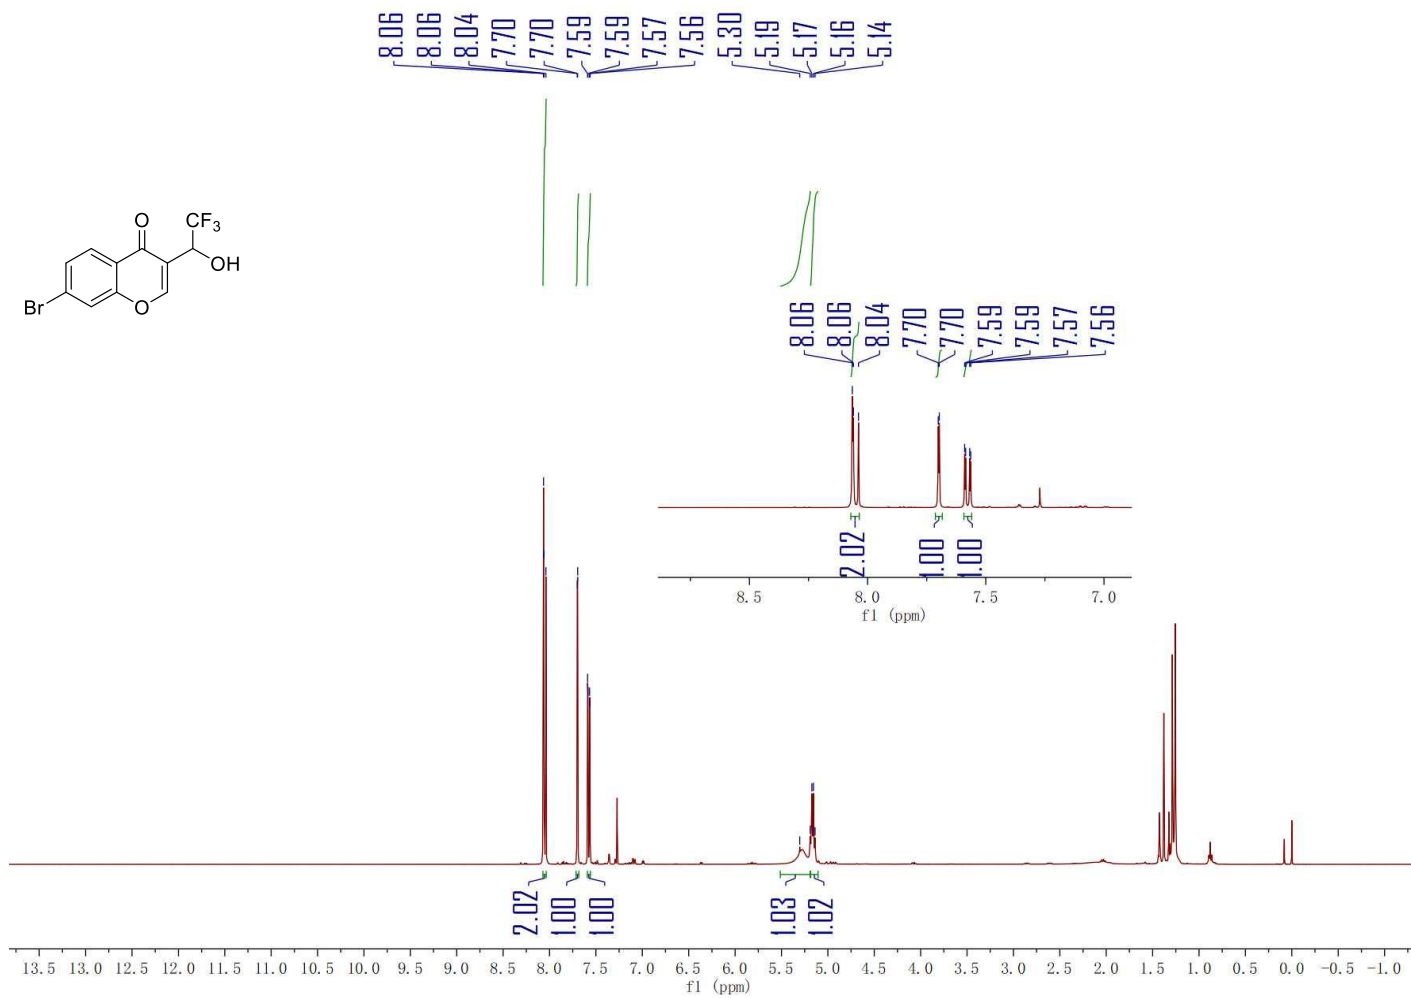

Fig. S53. <sup>1</sup>H NMR spectrum of compound **4k**

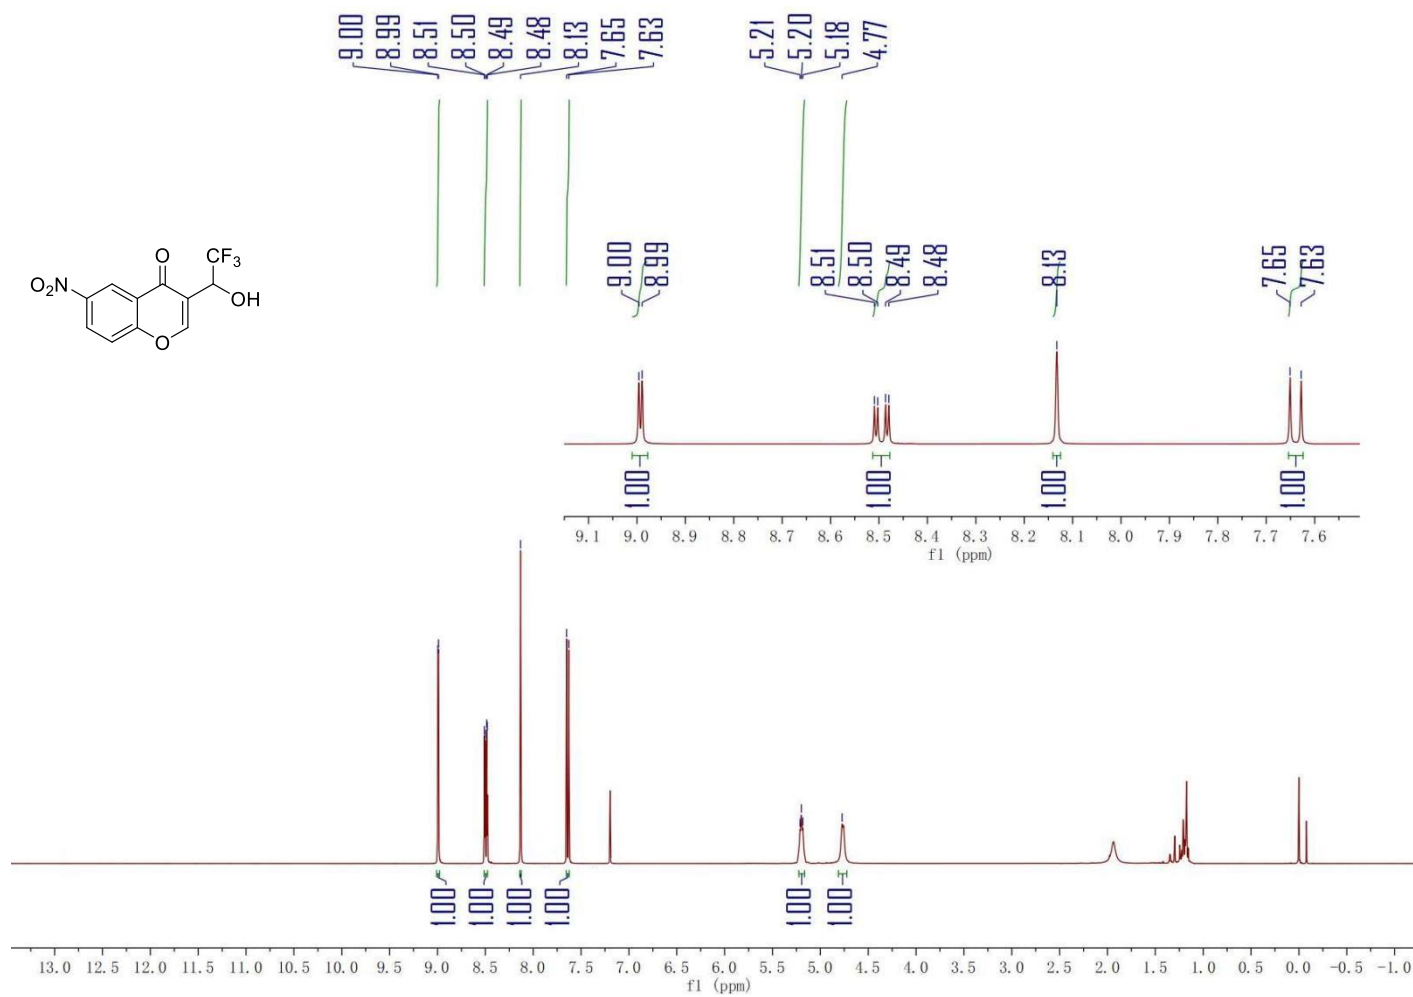

Fig. S54. <sup>1</sup>H NMR spectrum of compound 41

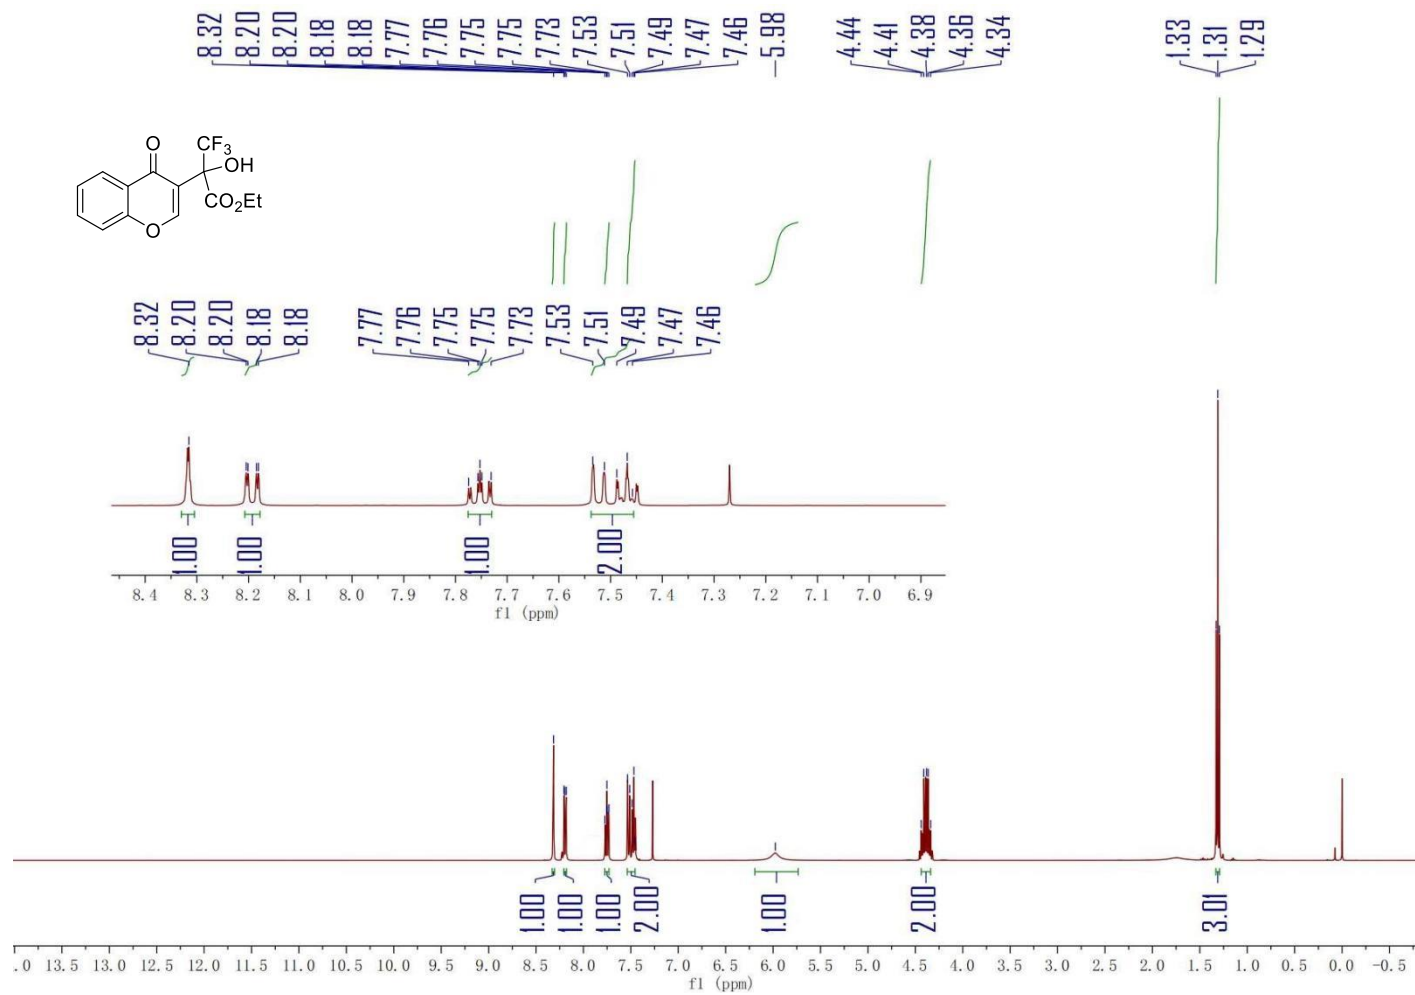

Fig. S55. <sup>1</sup>H NMR spectrum of compound 5a

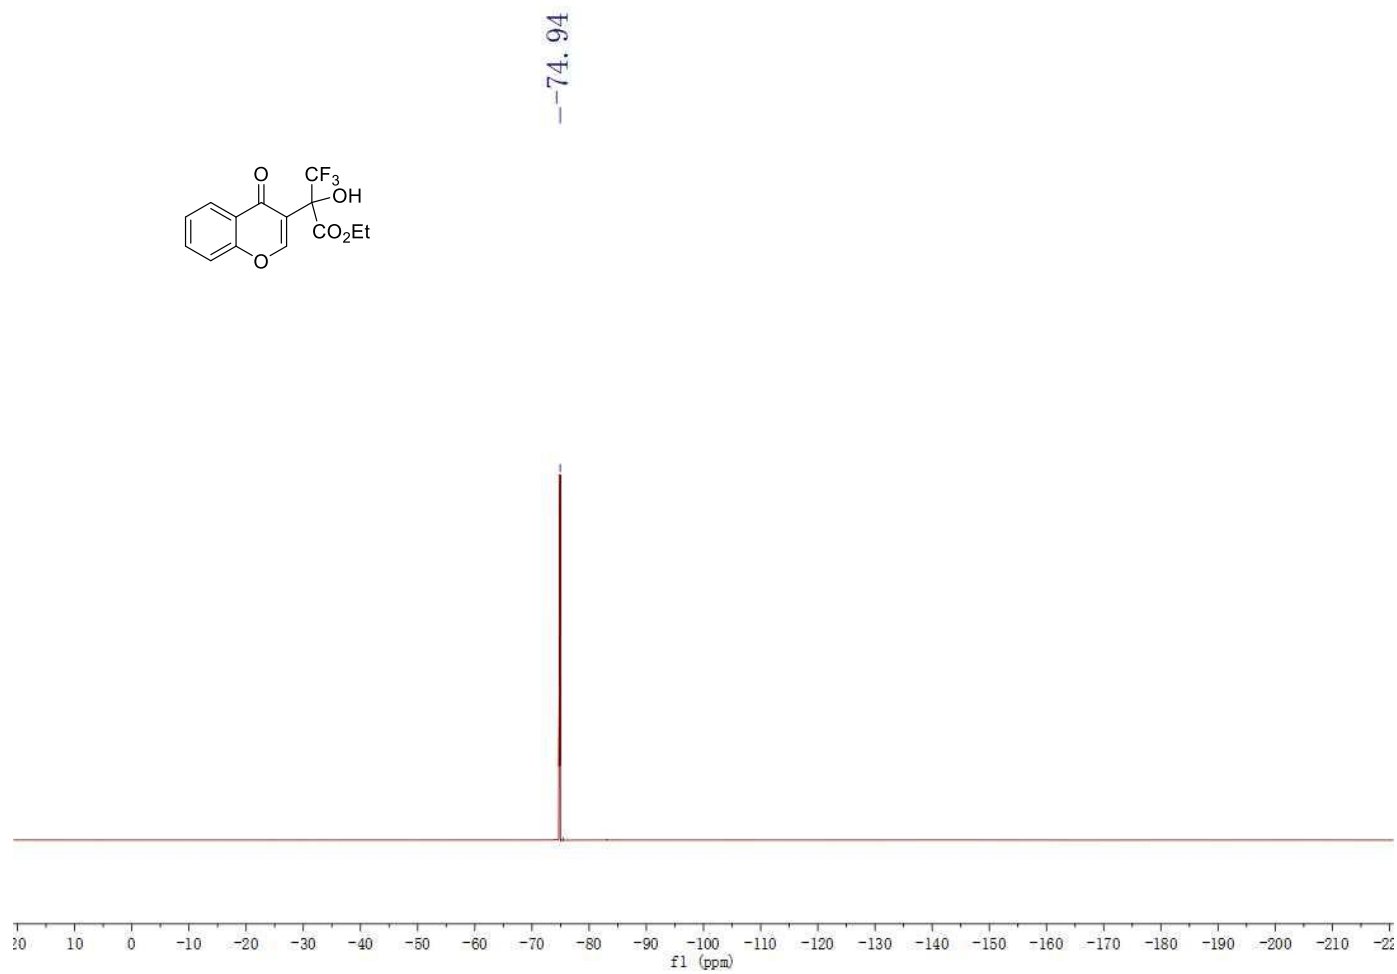

**Fig. S56.** <sup>1</sup>H NMR spectrum of compound **5a**

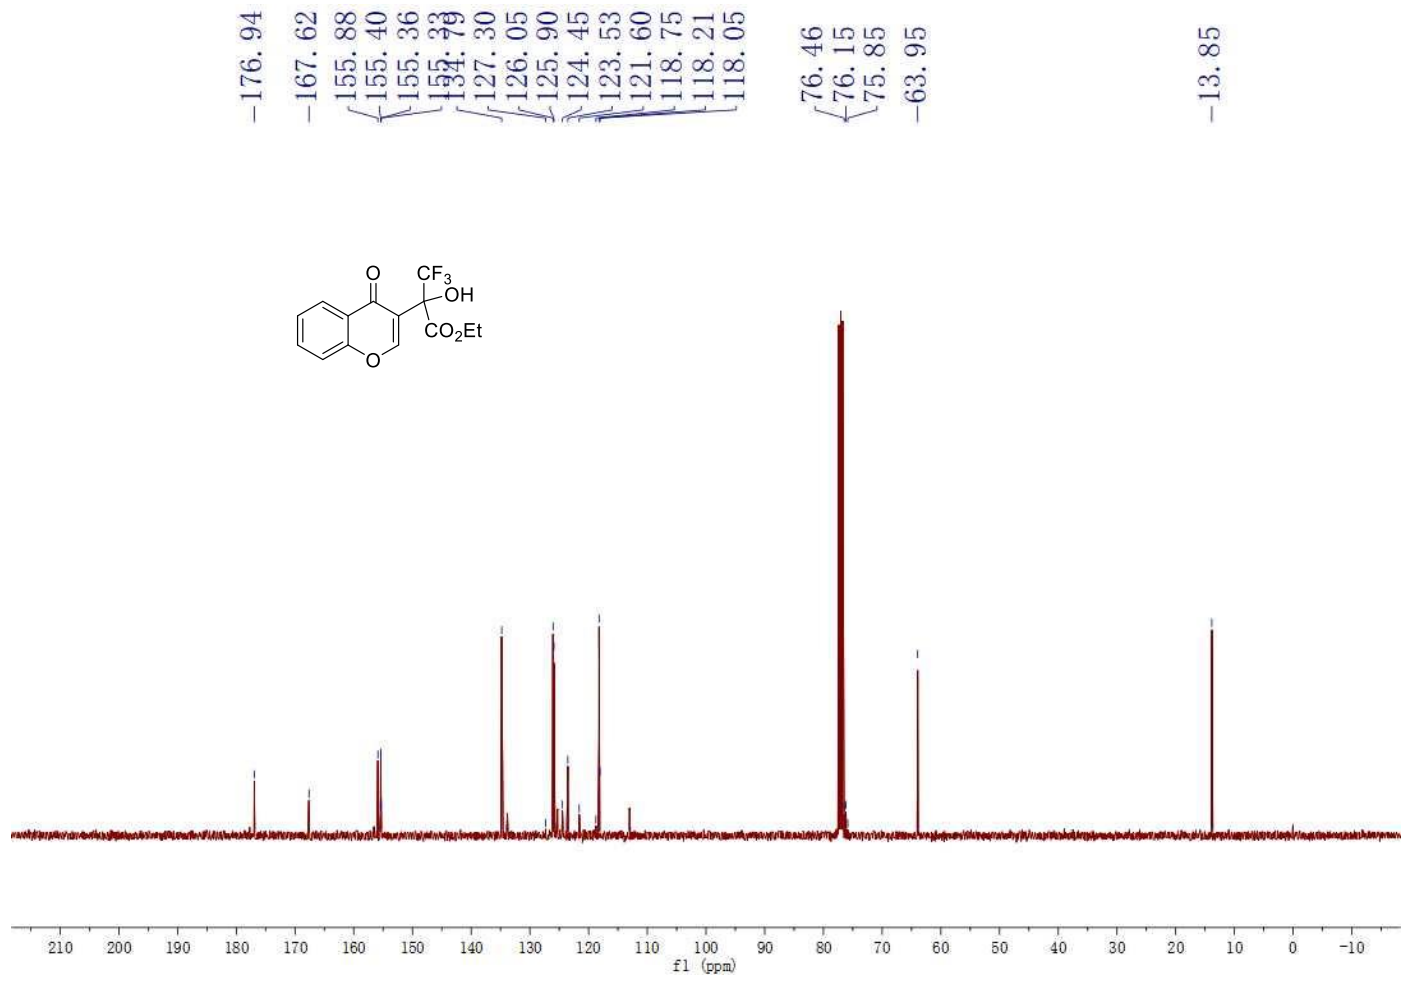

Fig. S57. <sup>1</sup>H NMR spectrum of compound 5a

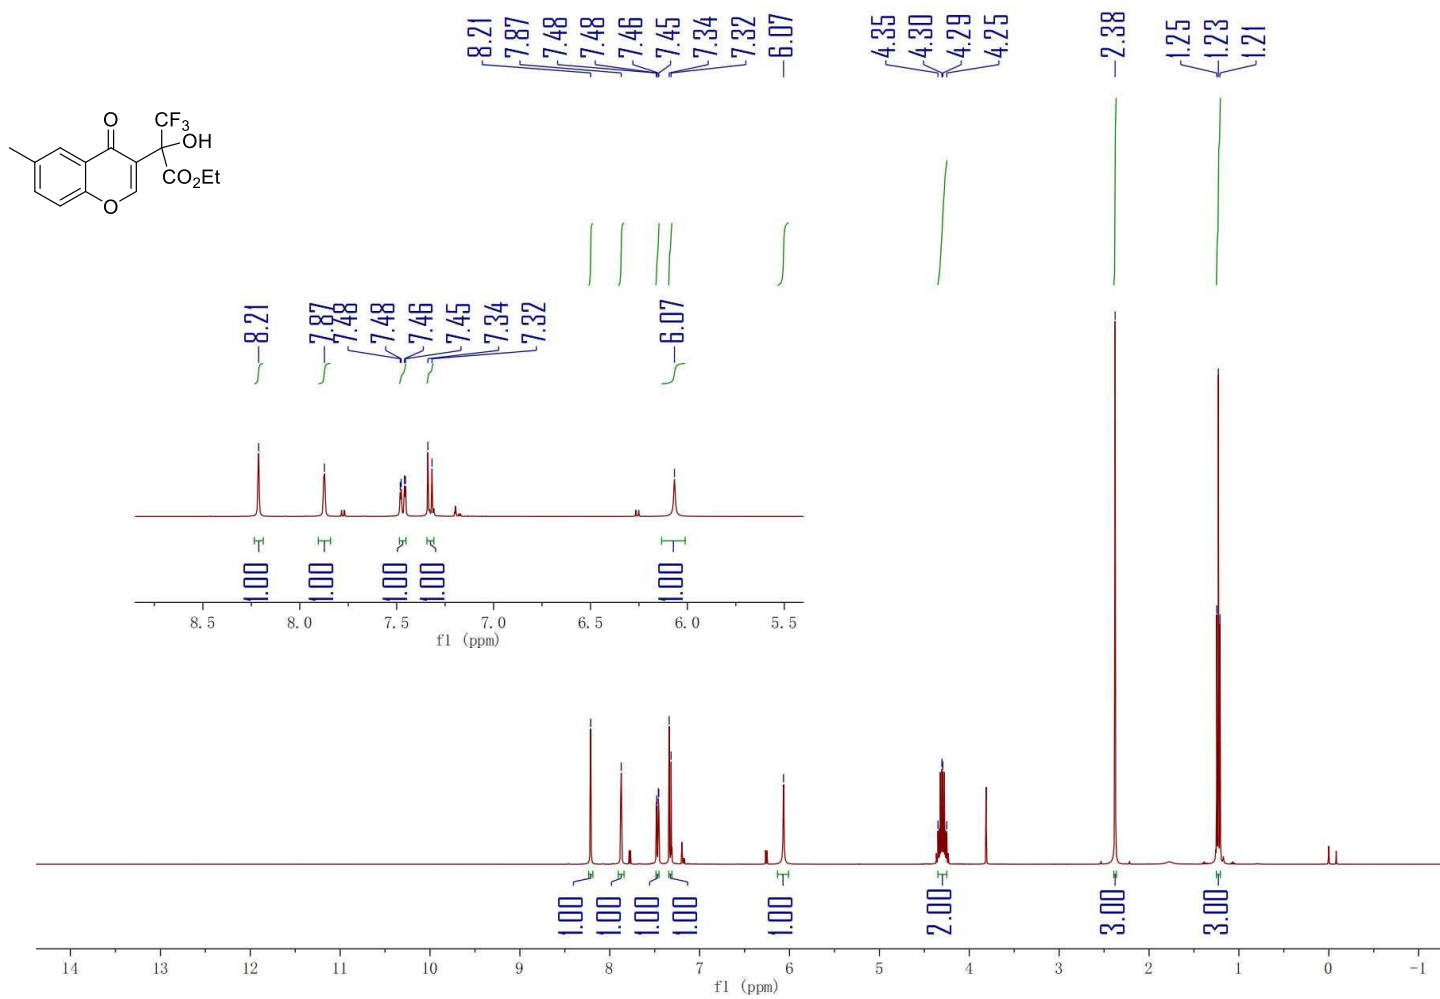

Fig. S58. <sup>1</sup>H NMR spectrum of compound **5b**

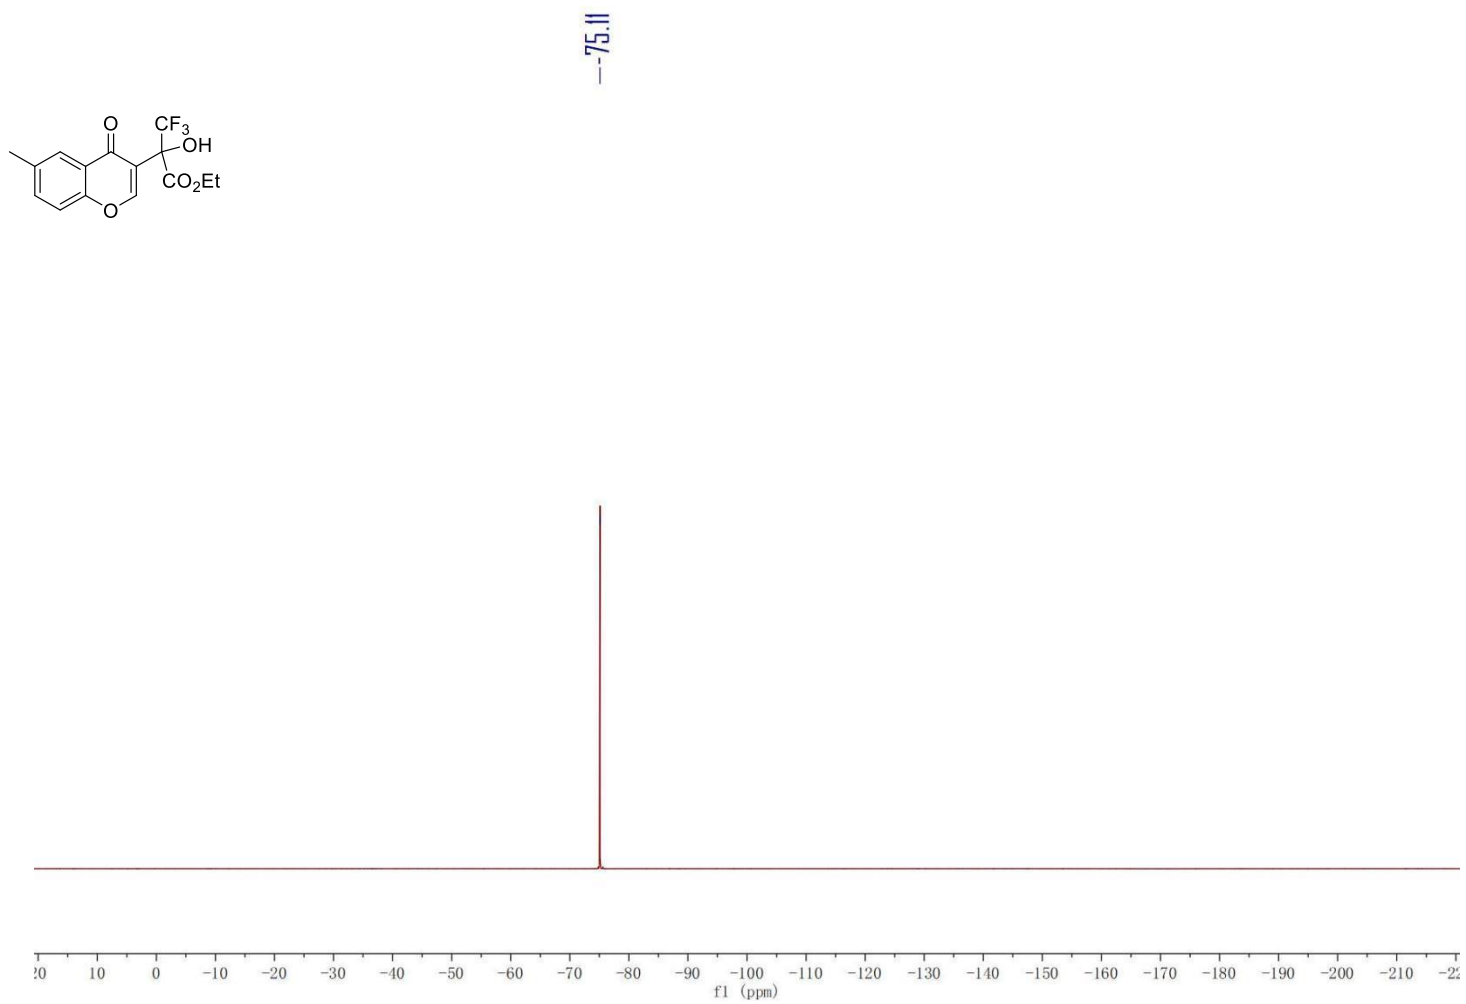

**Fig. S59.**  $^{19}\text{F}$  NMR spectrum of compound **5b**



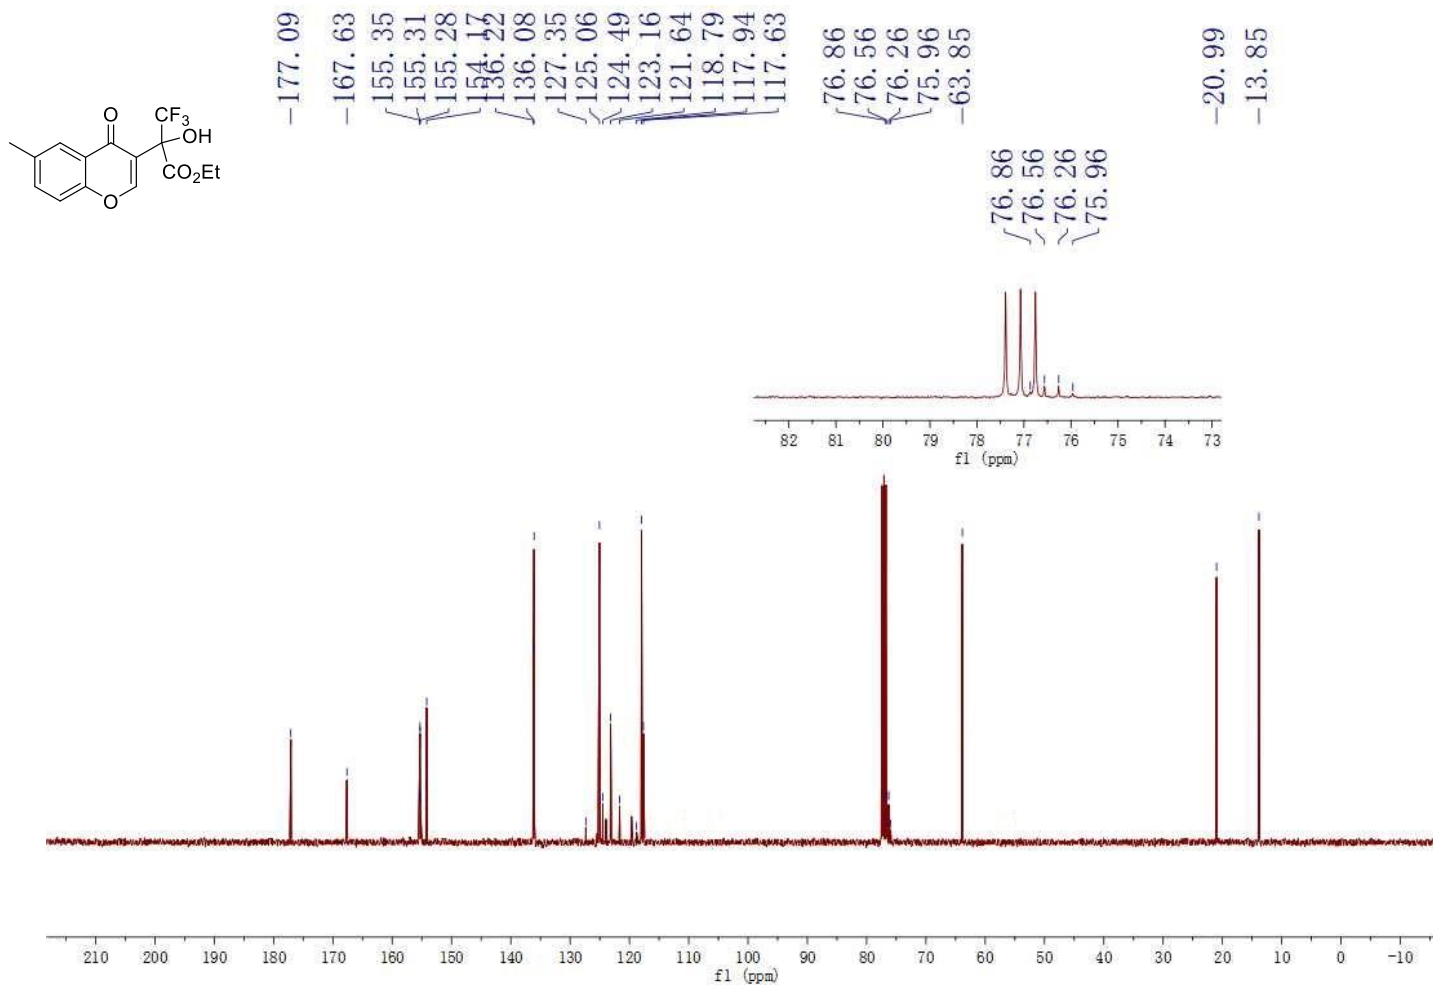

Fig. S60. <sup>19</sup>F NMR spectrum of compound 5b

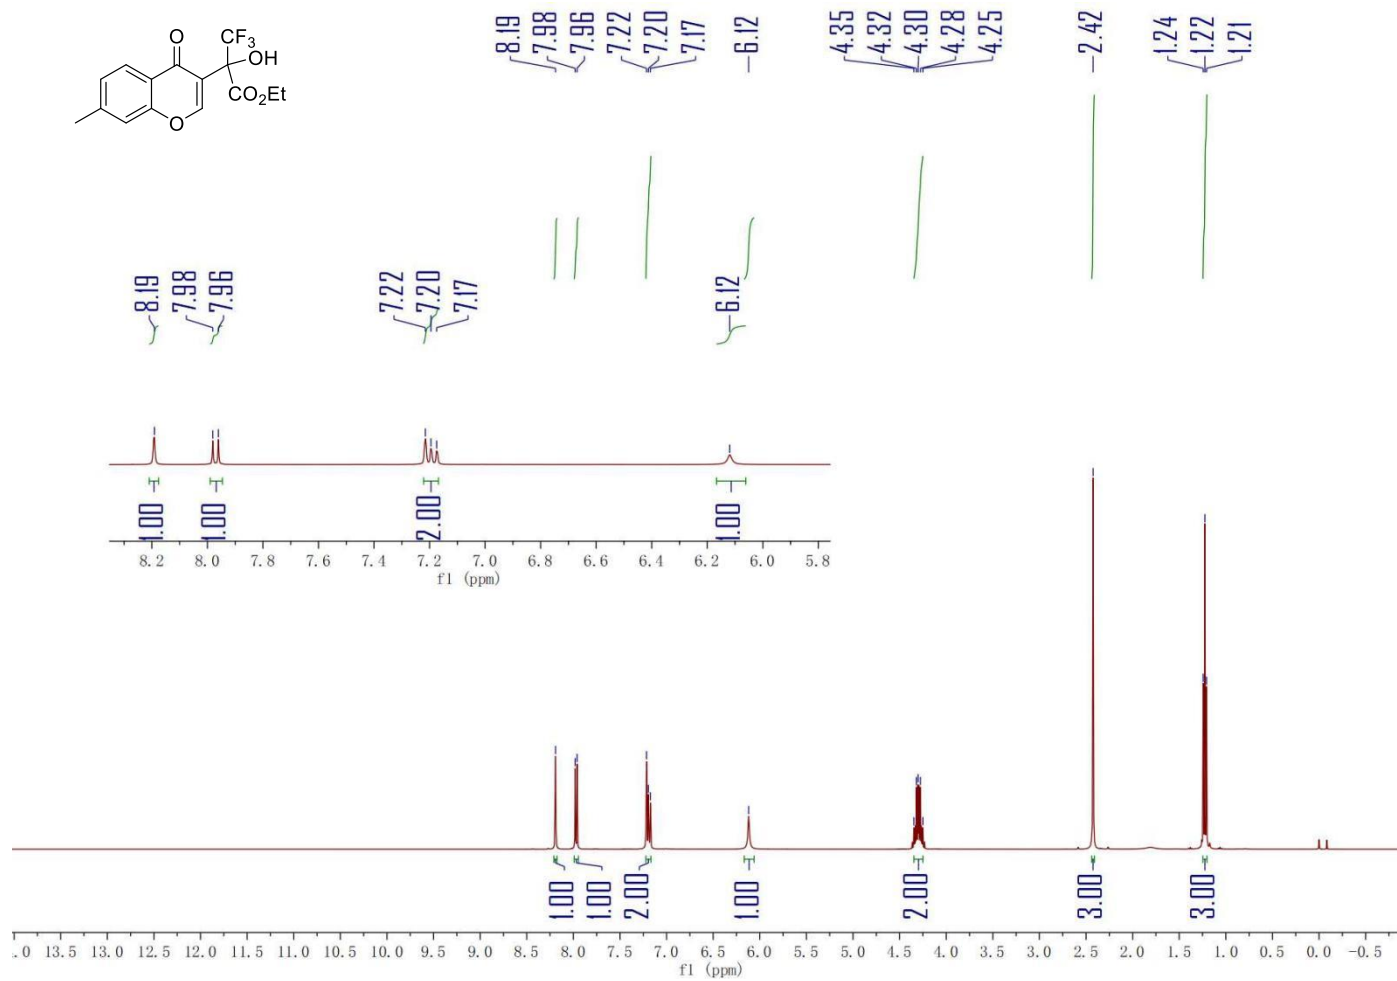

Fig. S61. <sup>1</sup>H NMR spectrum of compound **5c**

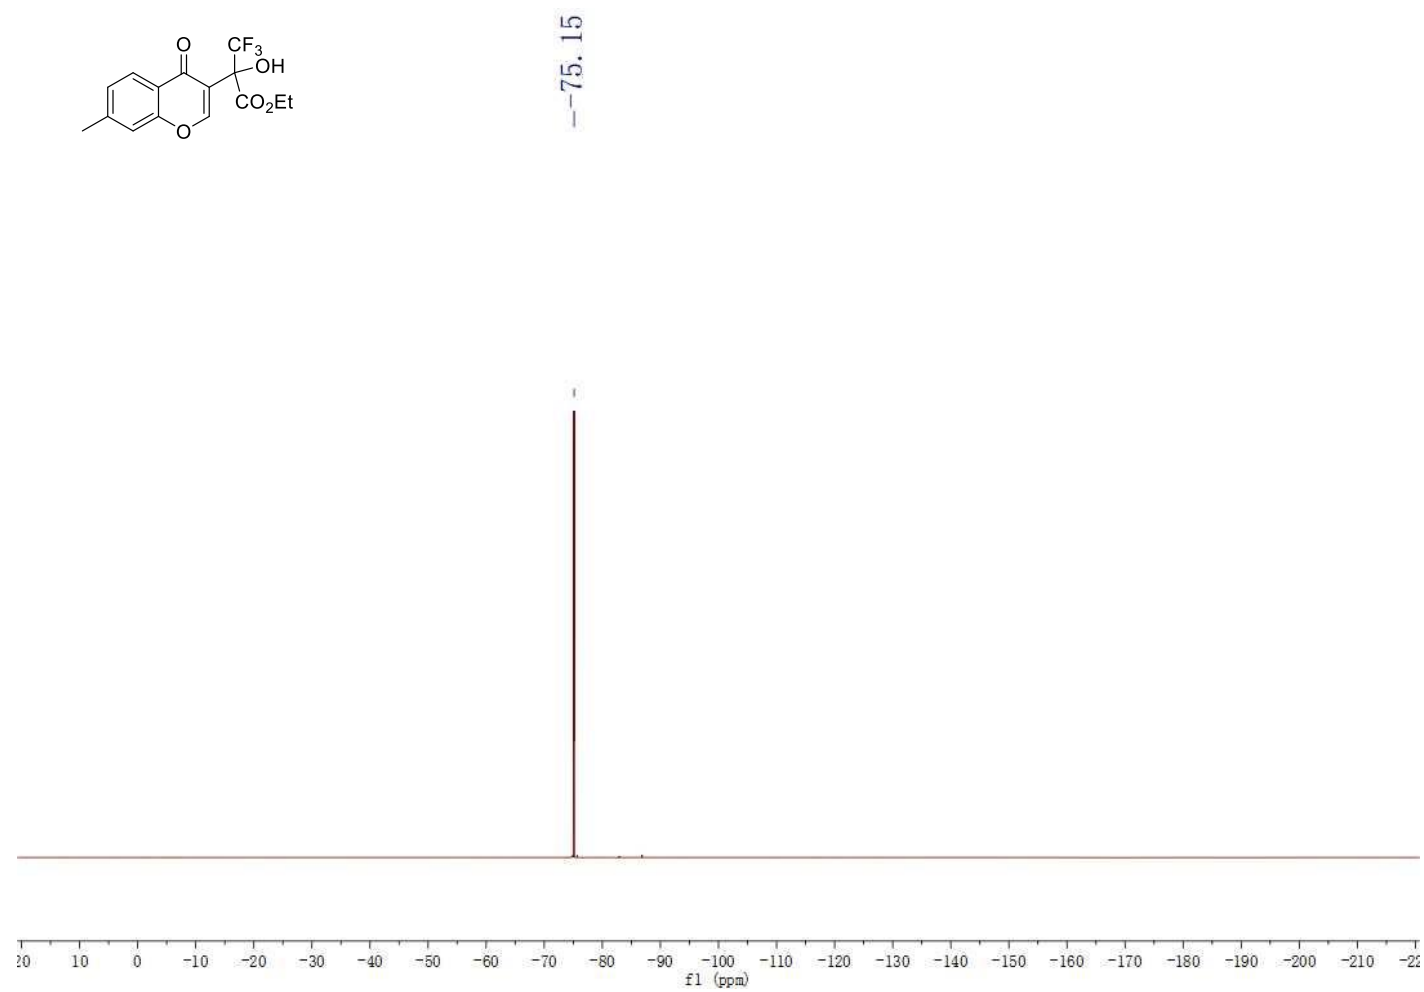

**Fig. S62.**  $^{19}\text{F}$  NMR spectrum of compound **5c**

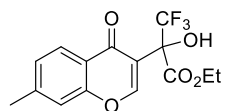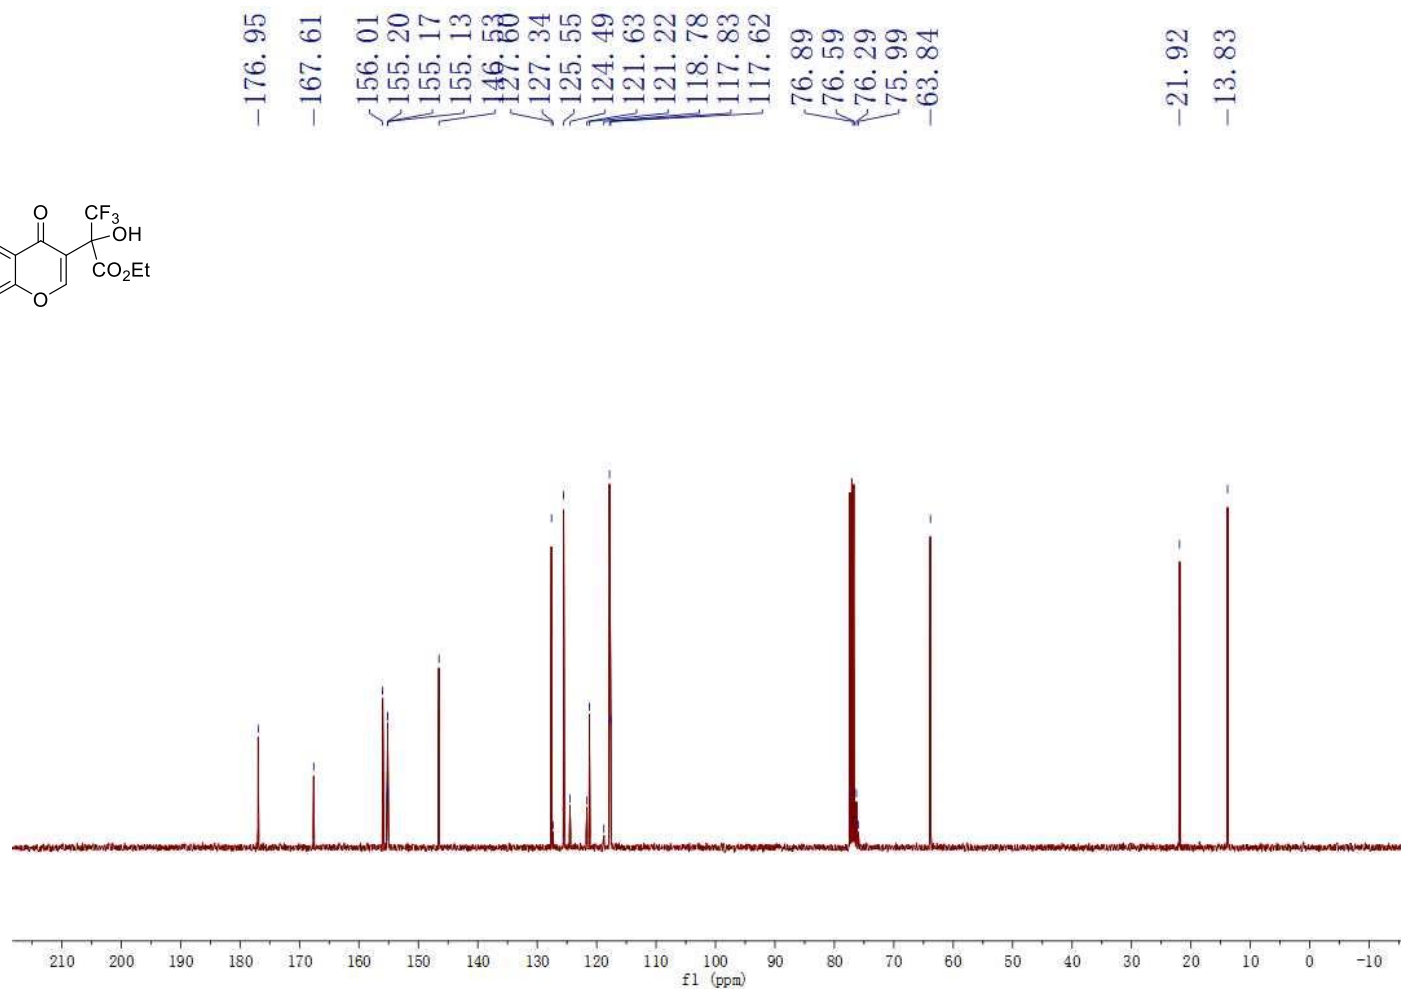

Fig. S63.  $^{13}\text{C}$  NMR spectrum of compound **5c**

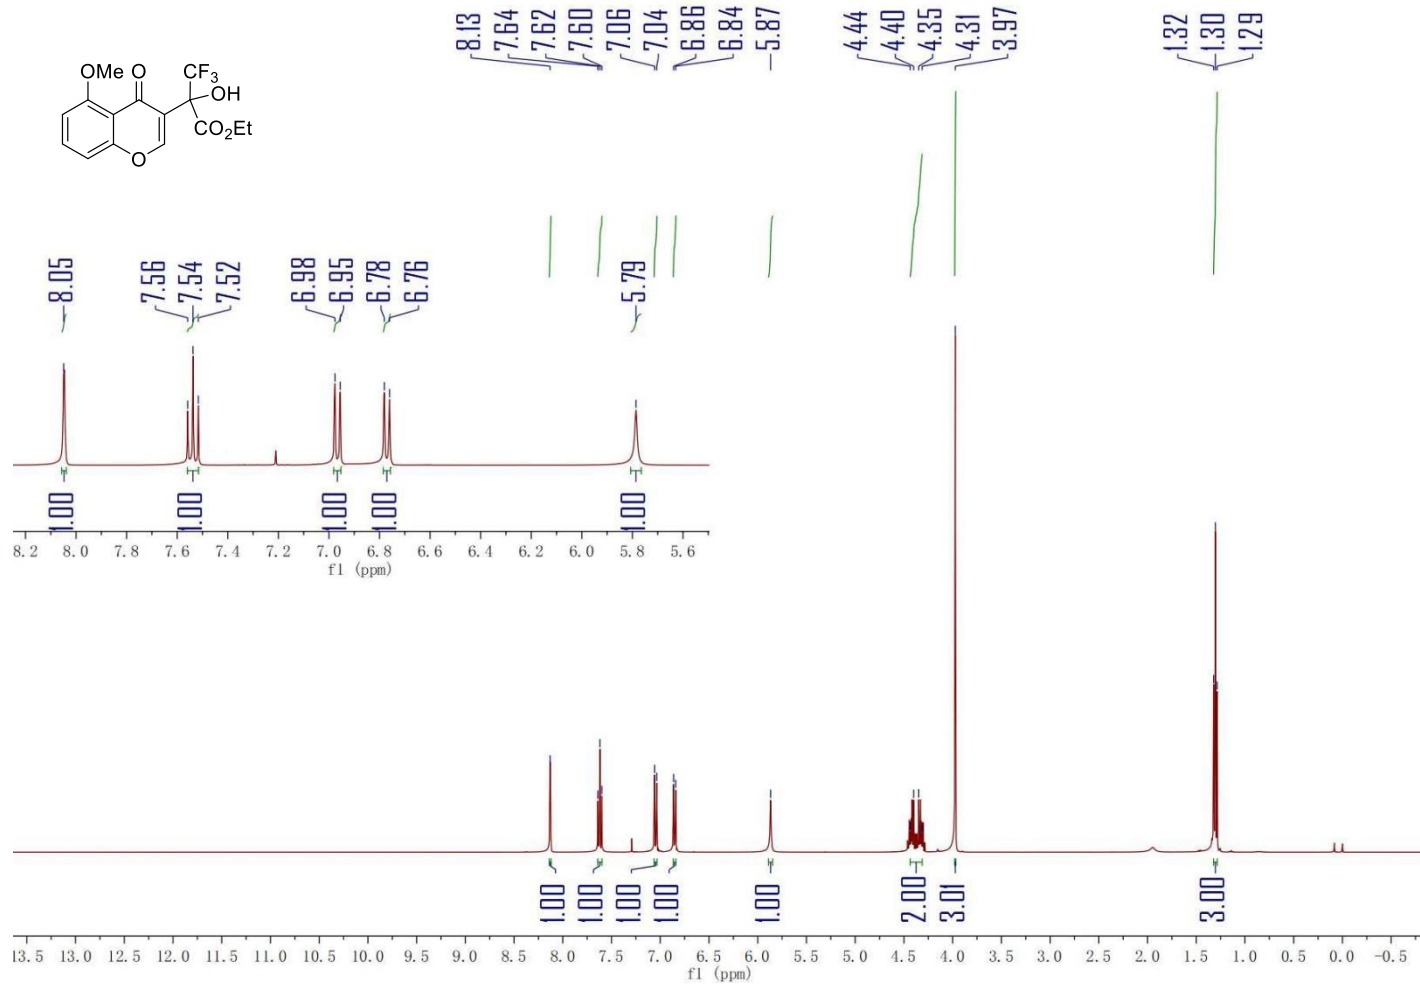

Fig. S64. <sup>1</sup>H NMR spectrum of compound **5d**

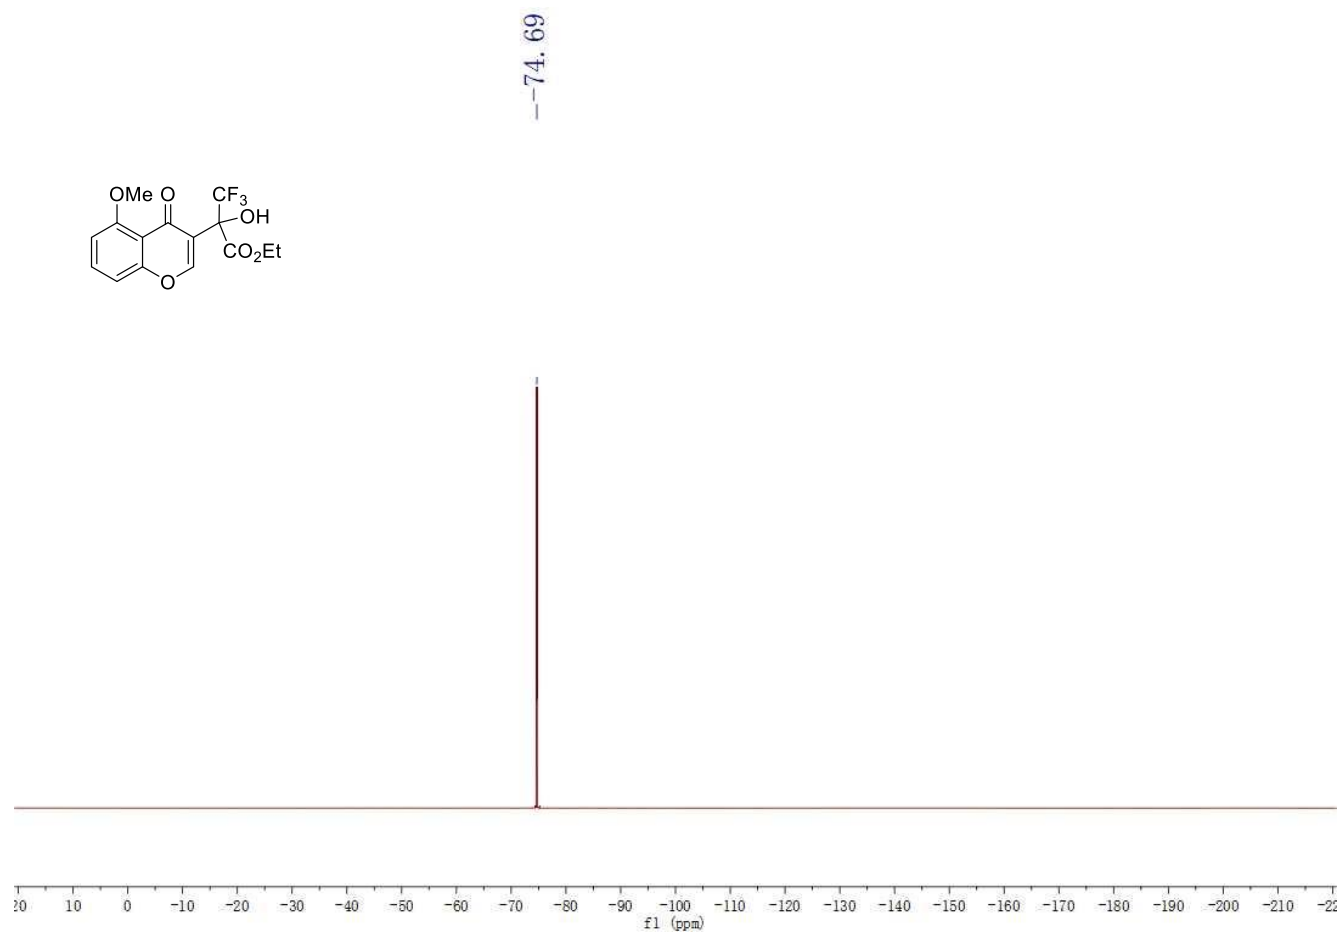

**Fig. S65.**  $^{19}\text{F}$  NMR spectrum of compound **5d**

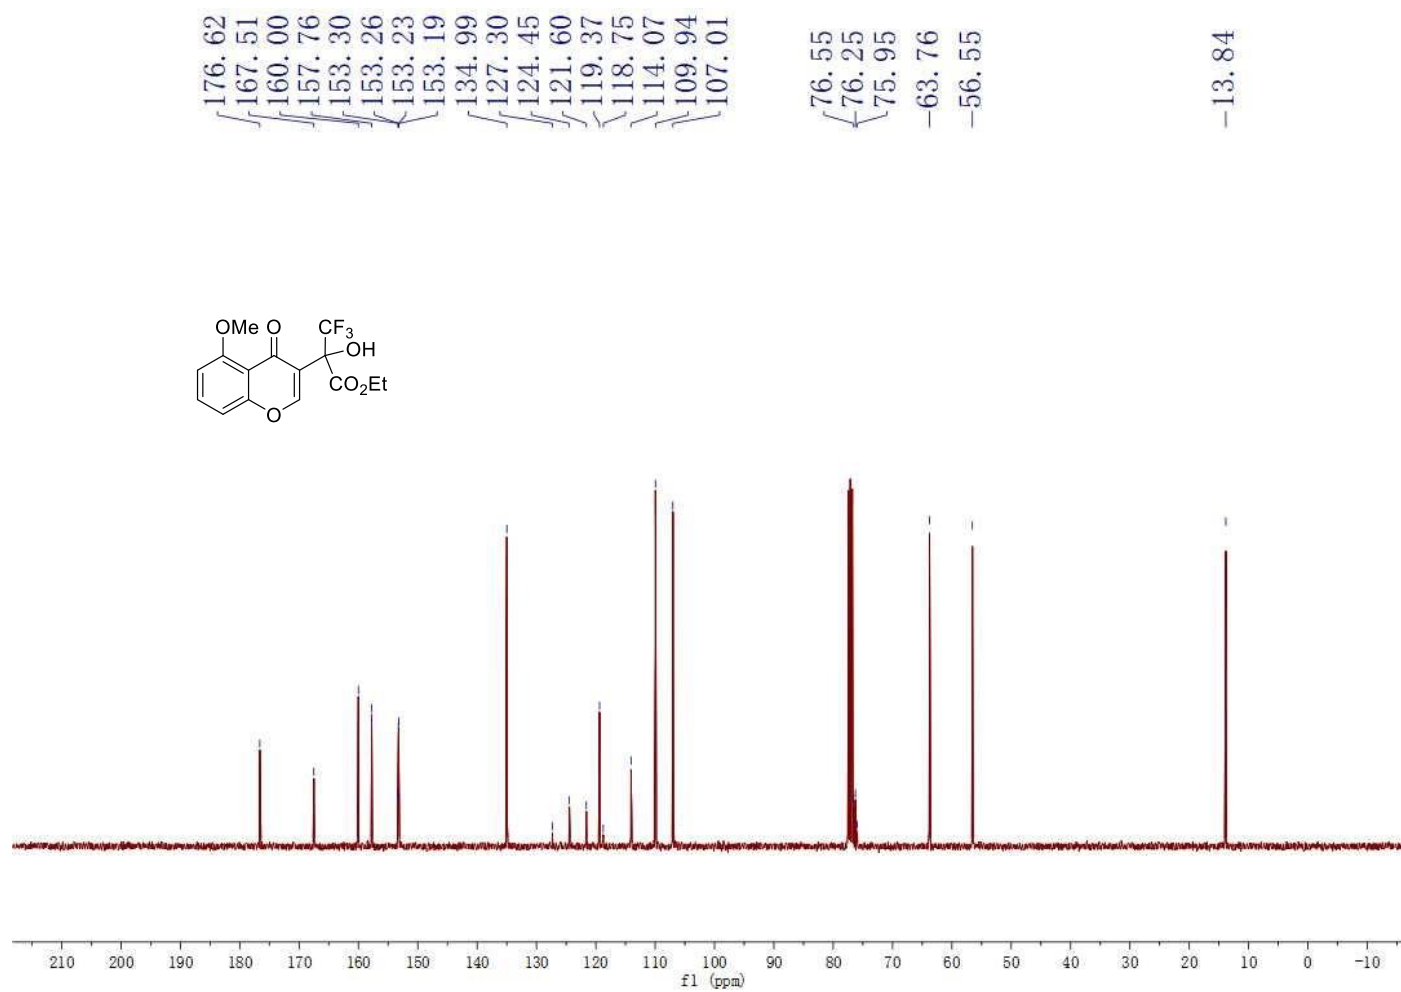

**Fig. S66.** <sup>13</sup>C NMR spectrum of compound **5d**

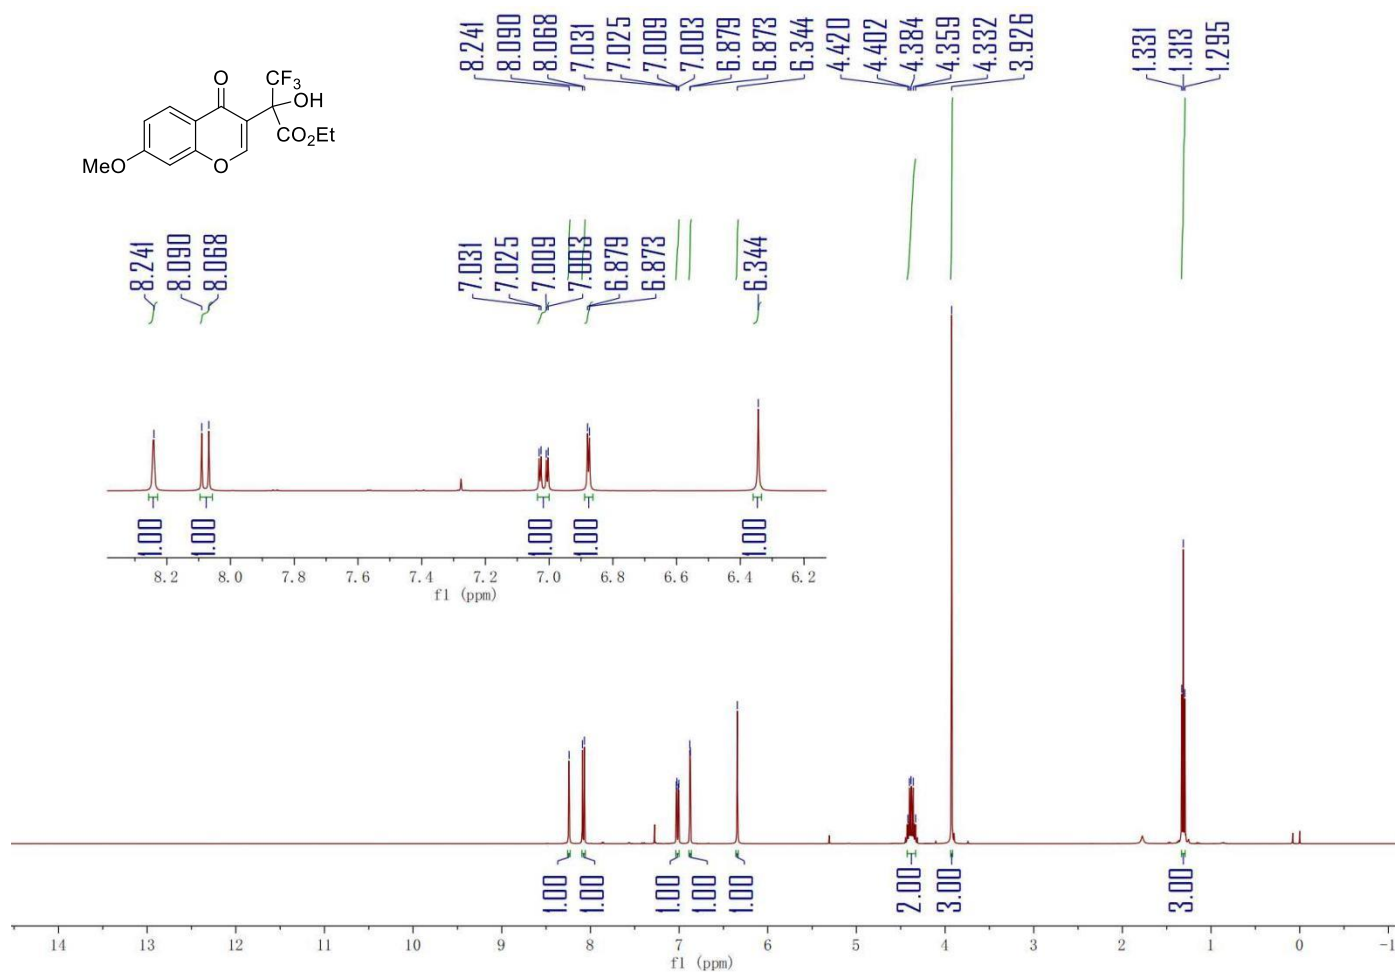

Fig. S67.  $^1\text{H}$  NMR spectrum of compound **5e**



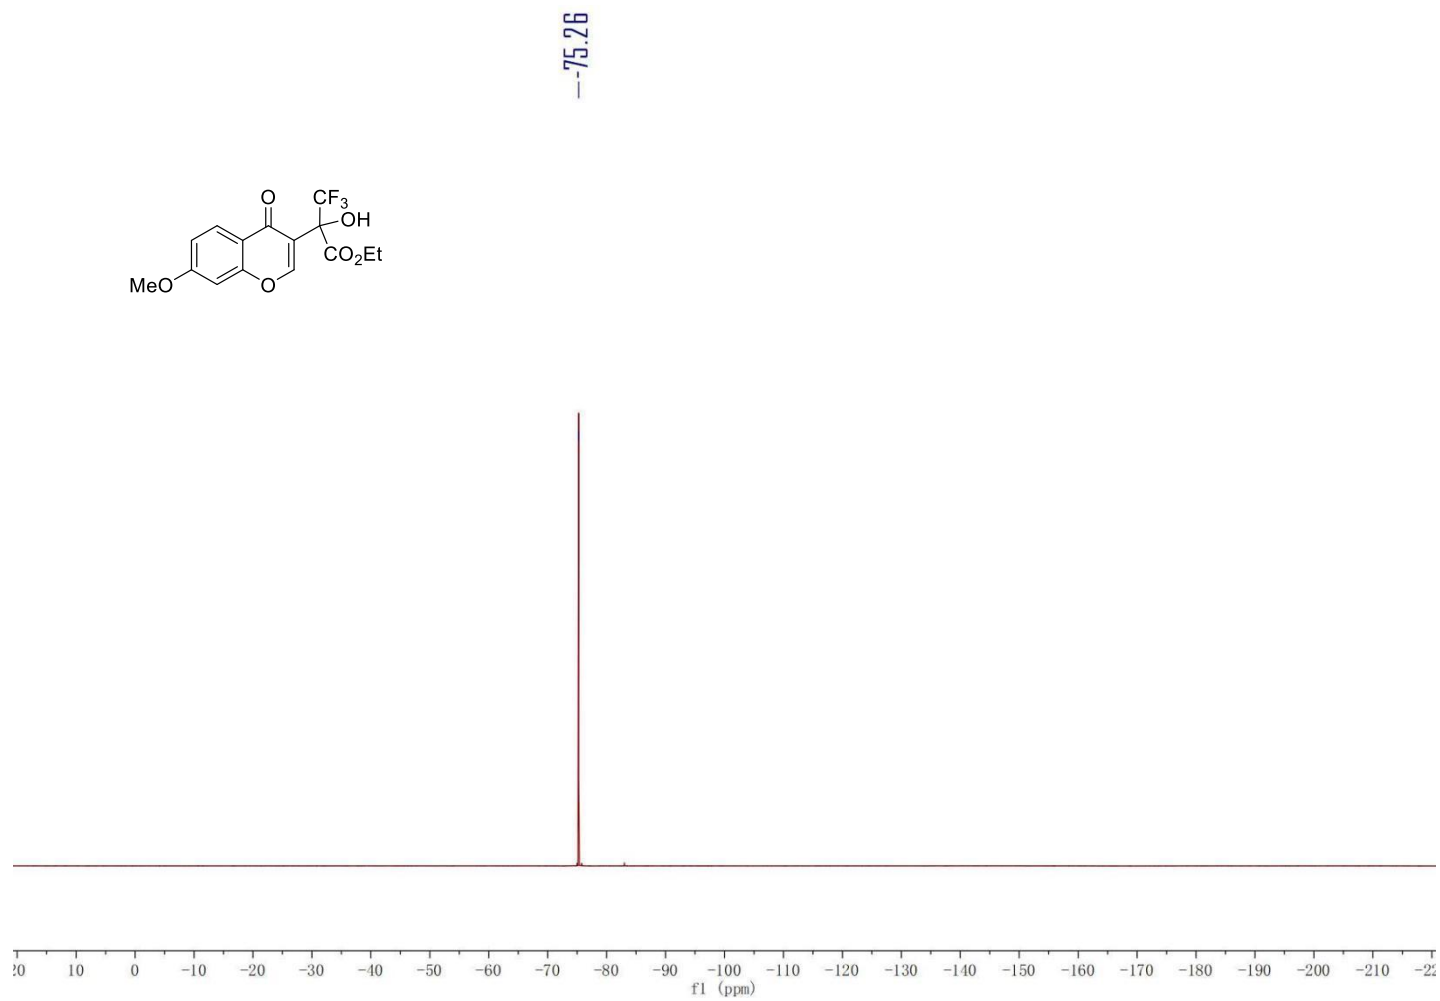

**Fig. S68.**  $^{19}\text{F}$  NMR spectrum of compound **5e**

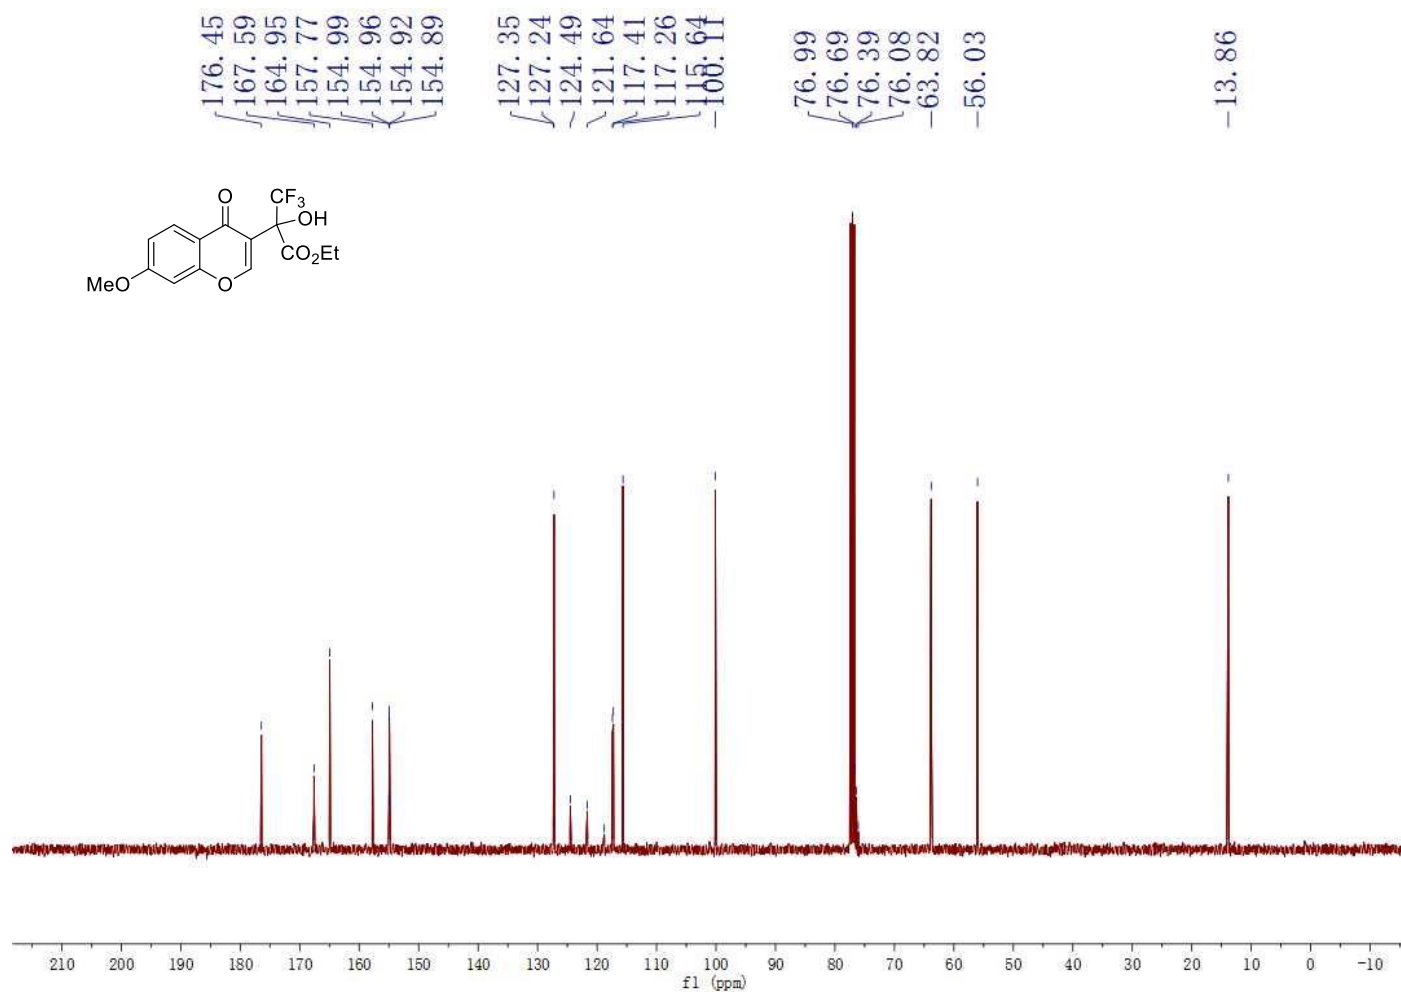

**Fig. S69.** <sup>19</sup>F NMR spectrum of compound **5e**

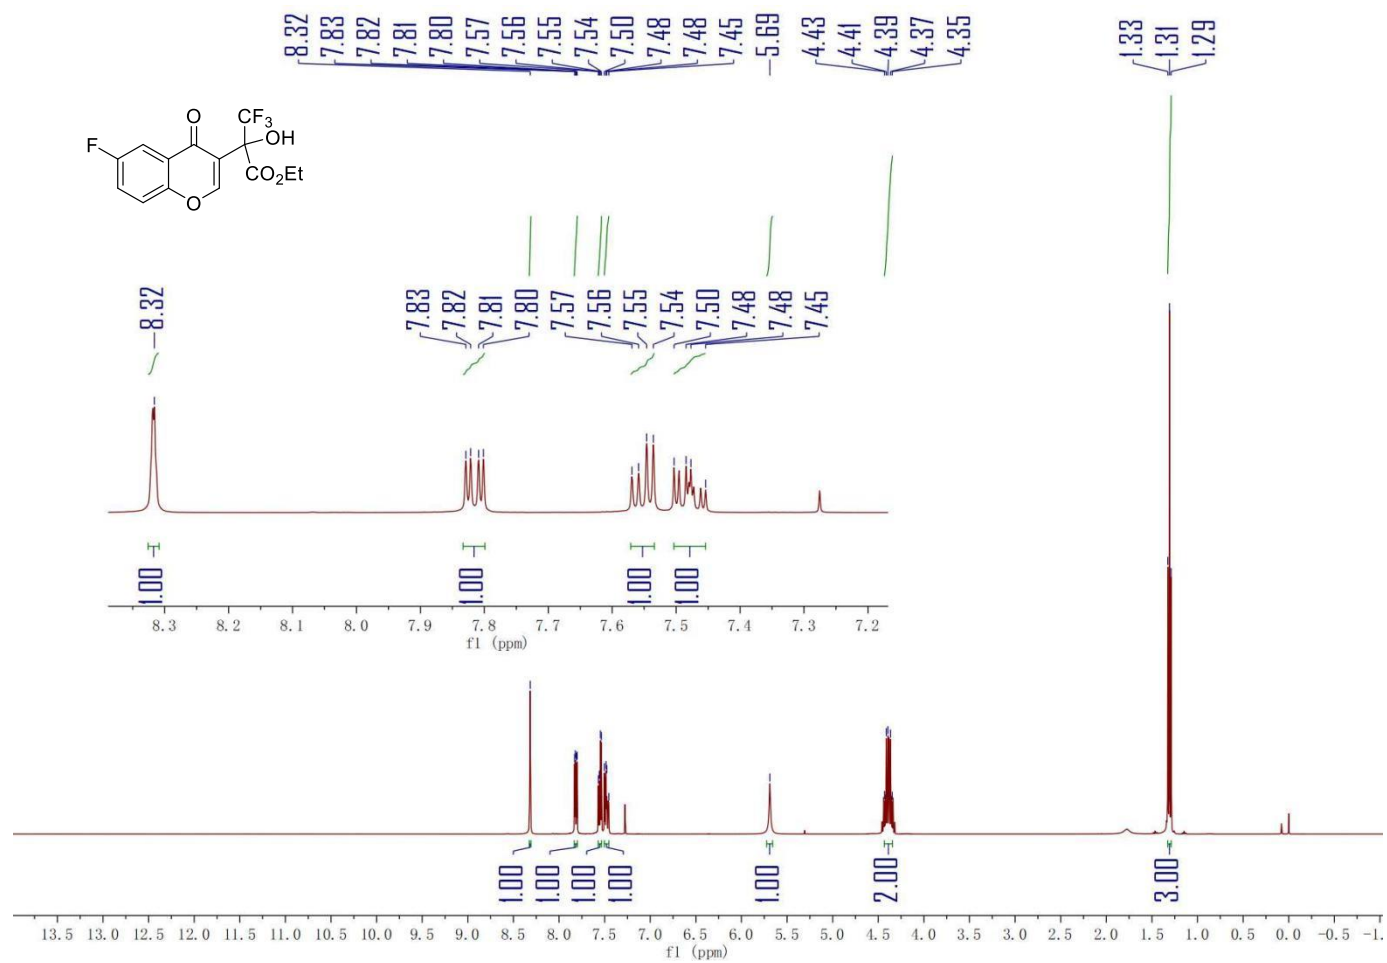

**Fig. S70.** <sup>1</sup>H NMR spectrum of compound **3f**

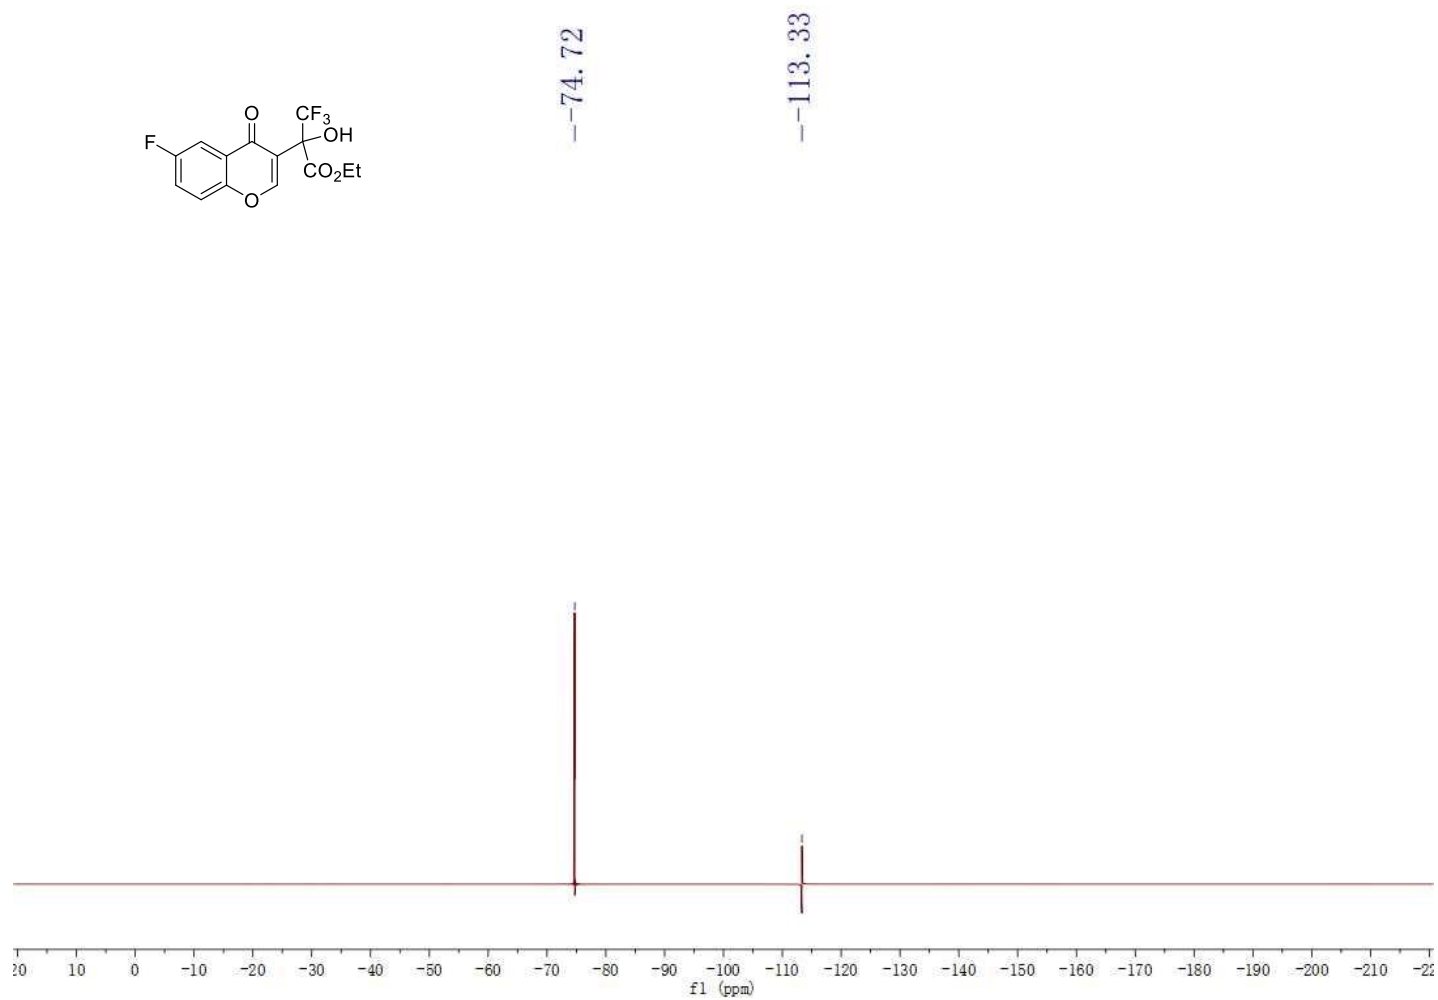

**Fig. S71.**  $^{19}\text{F}$  NMR spectrum of compound **3f**

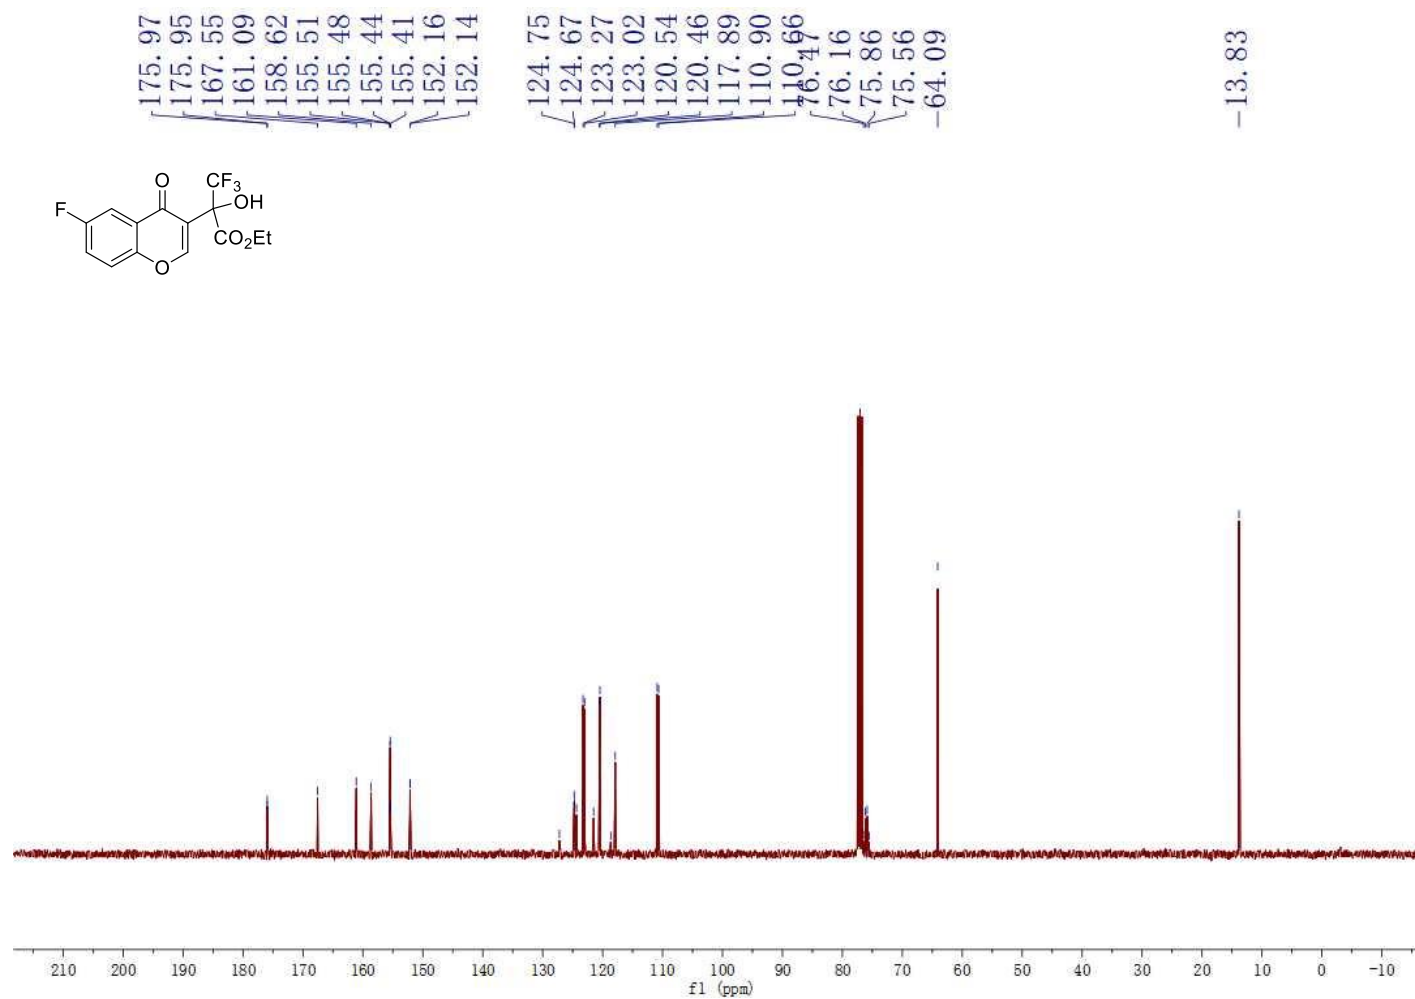

Fig. S72. <sup>13</sup>C NMR spectrum of compound 3f

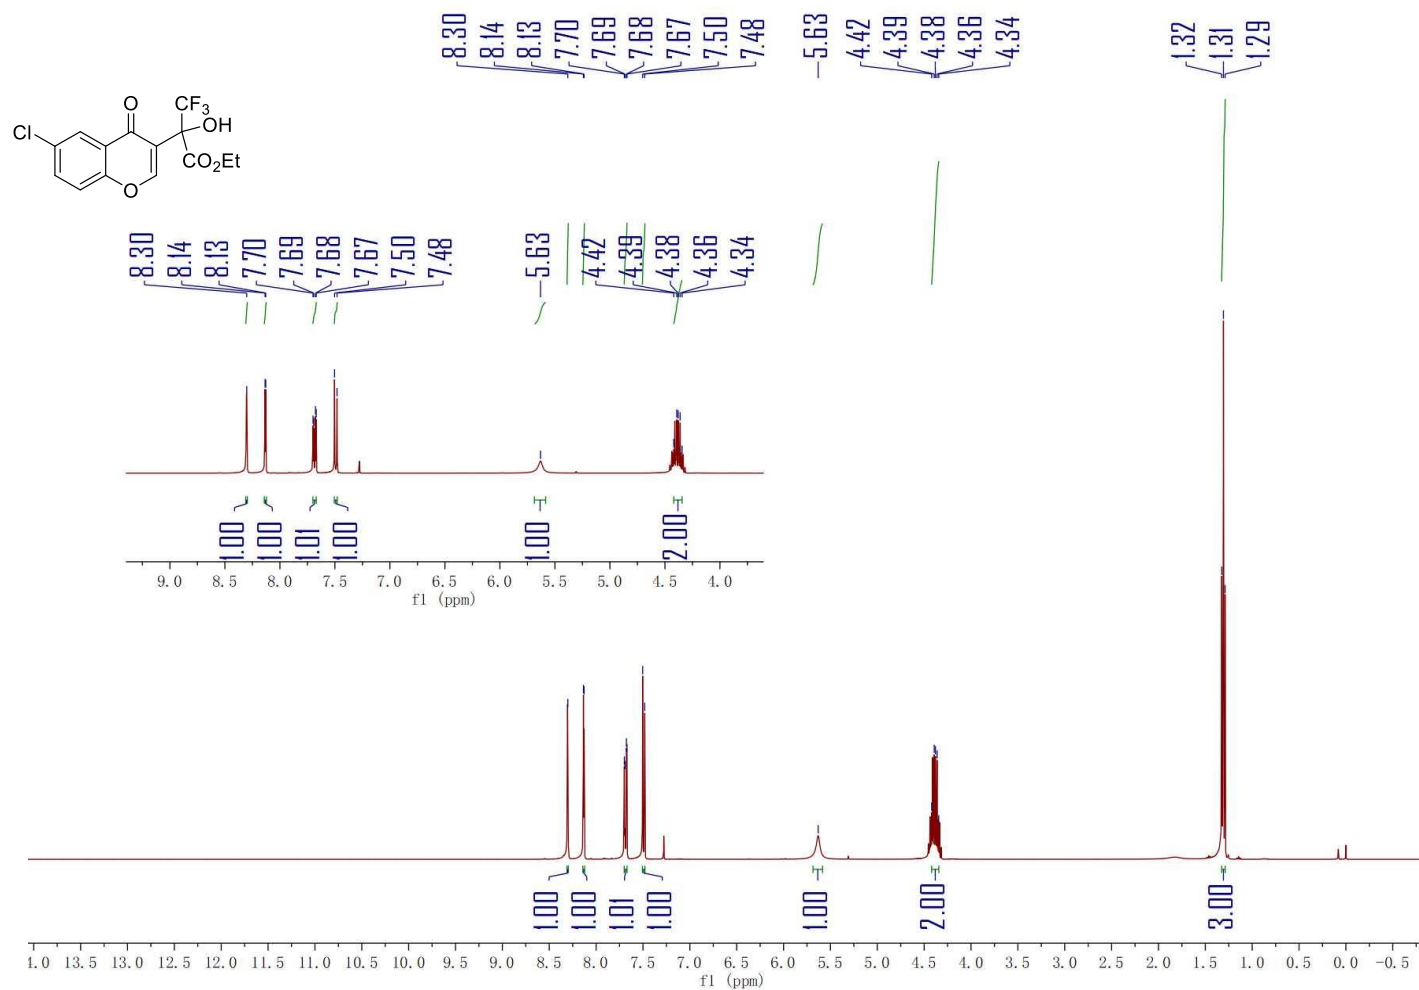

Fig. S73.  $^1\text{H}$  NMR spectrum of compound 5g

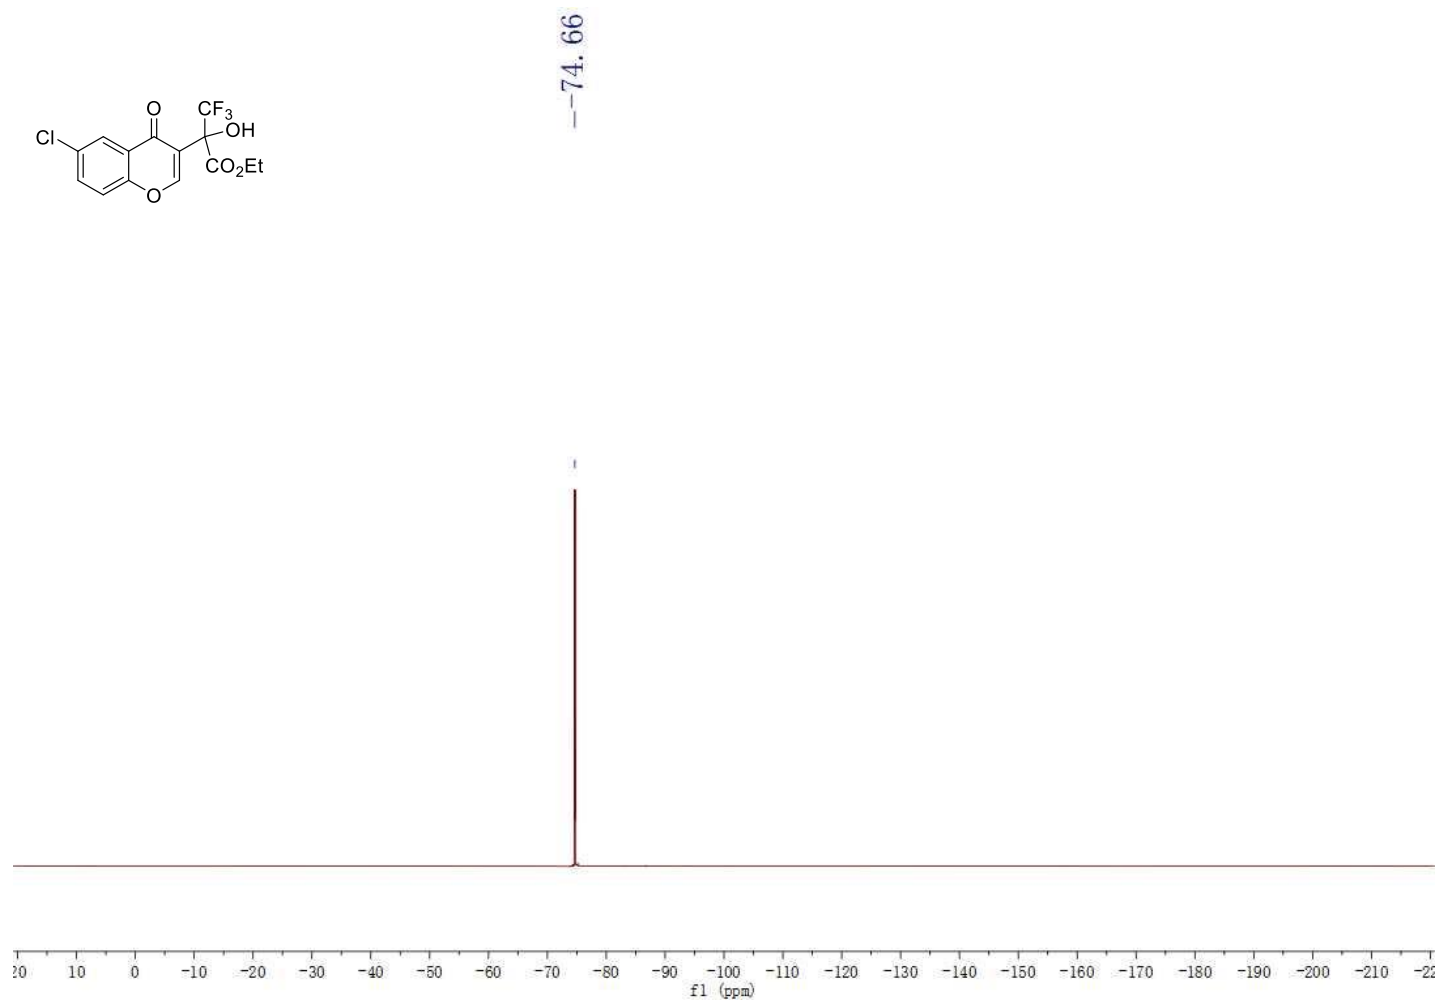

**Fig. S74.**  $^{19}\text{F}$  NMR spectrum of compound **5g**

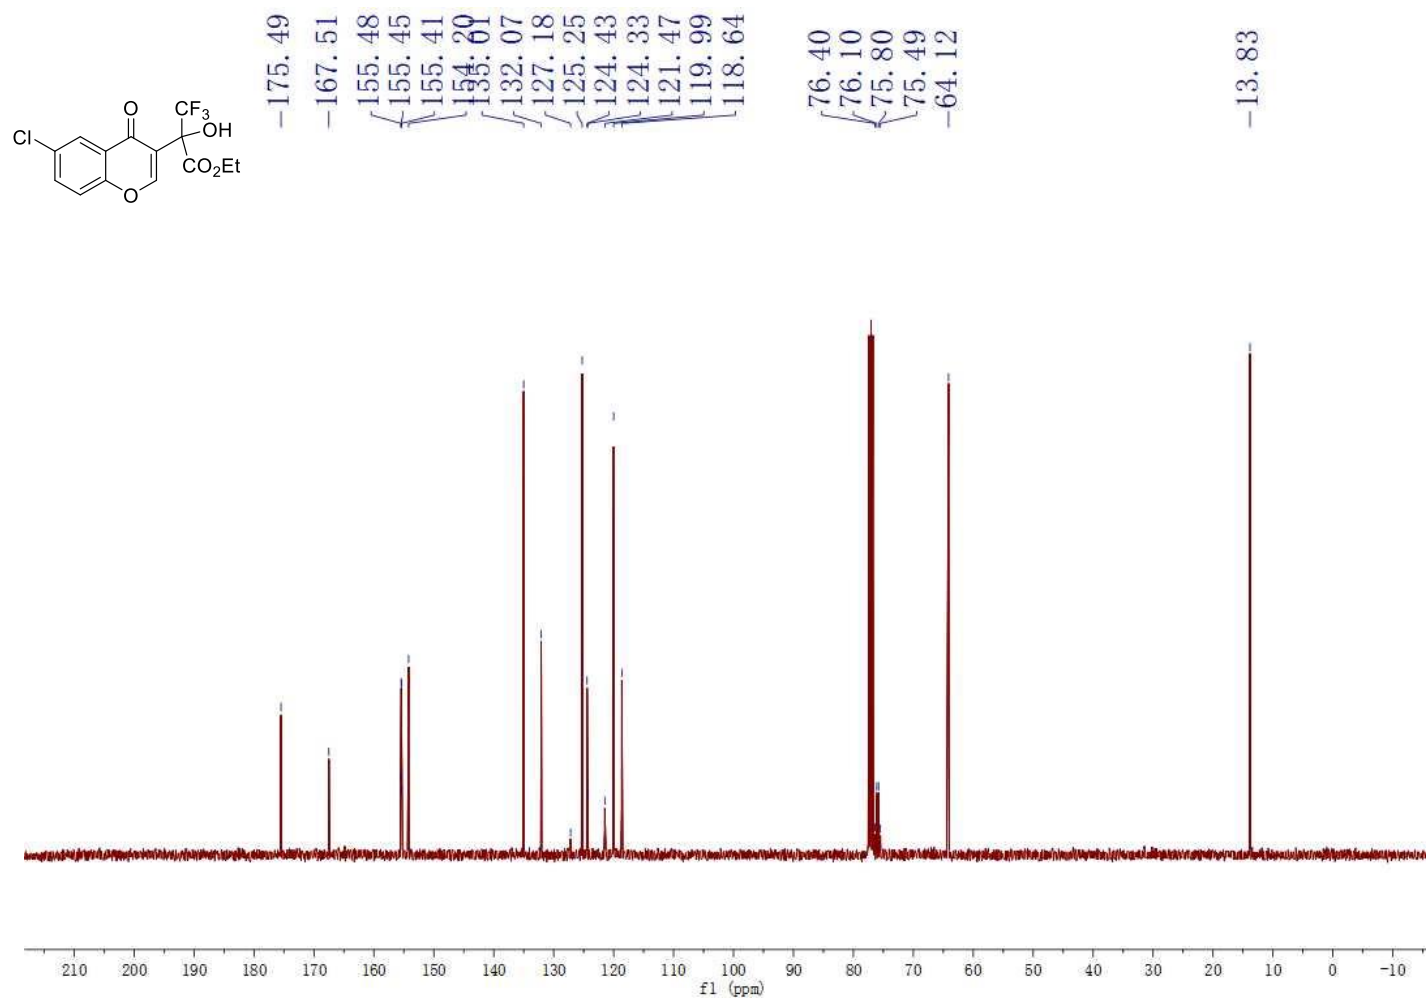

Fig. S75. <sup>13</sup>C NMR spectrum of compound **5g**



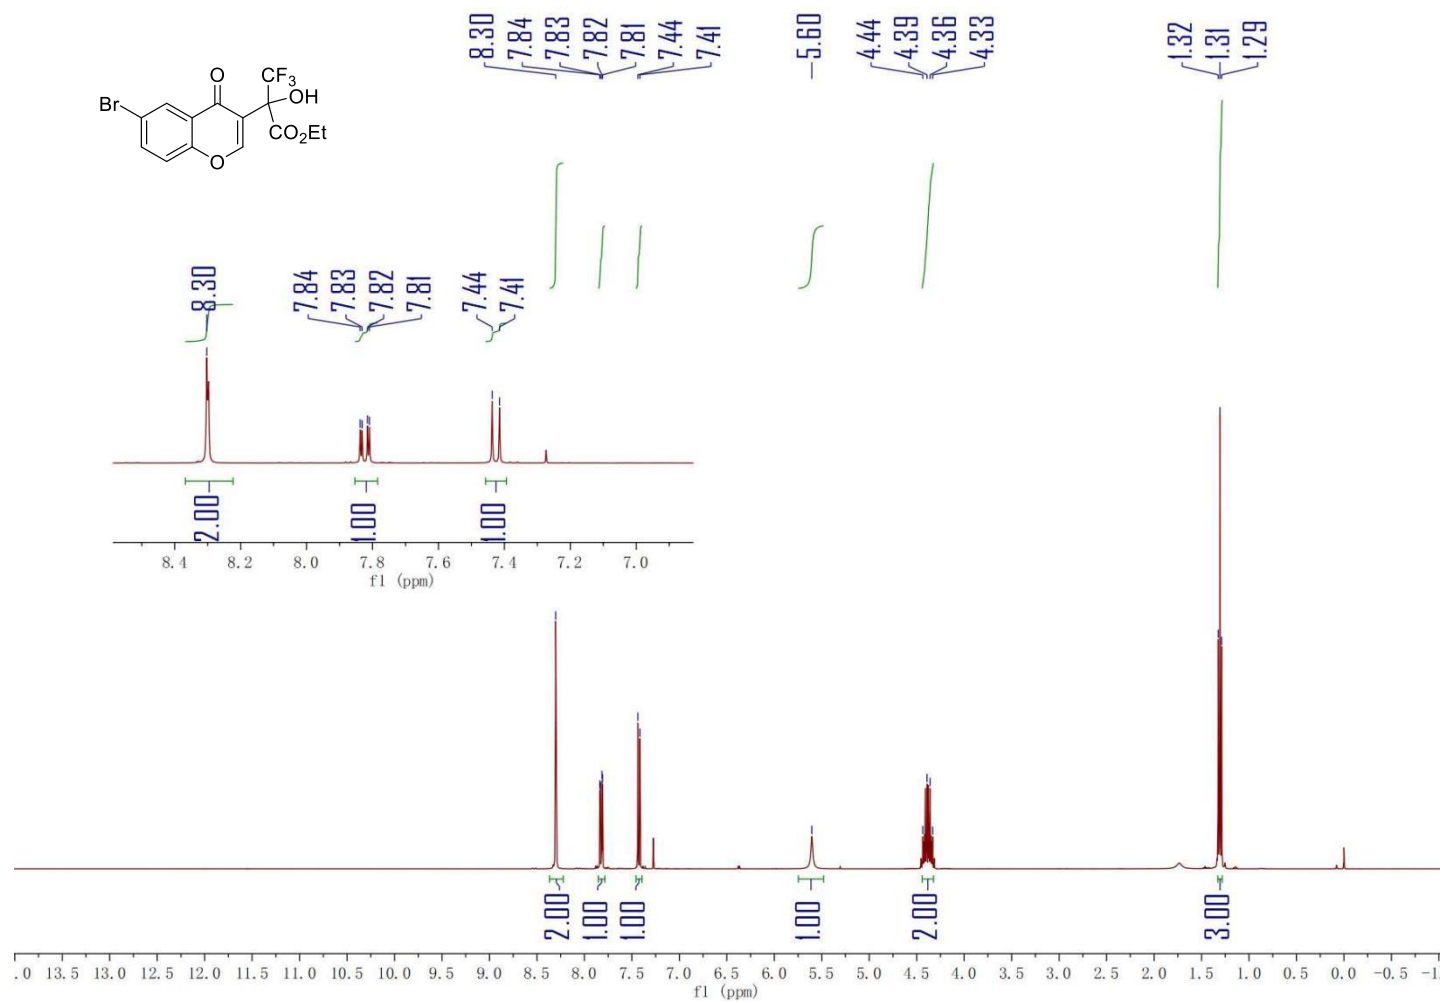

**Fig. S76.** <sup>1</sup>H NMR spectrum of compound **5h**

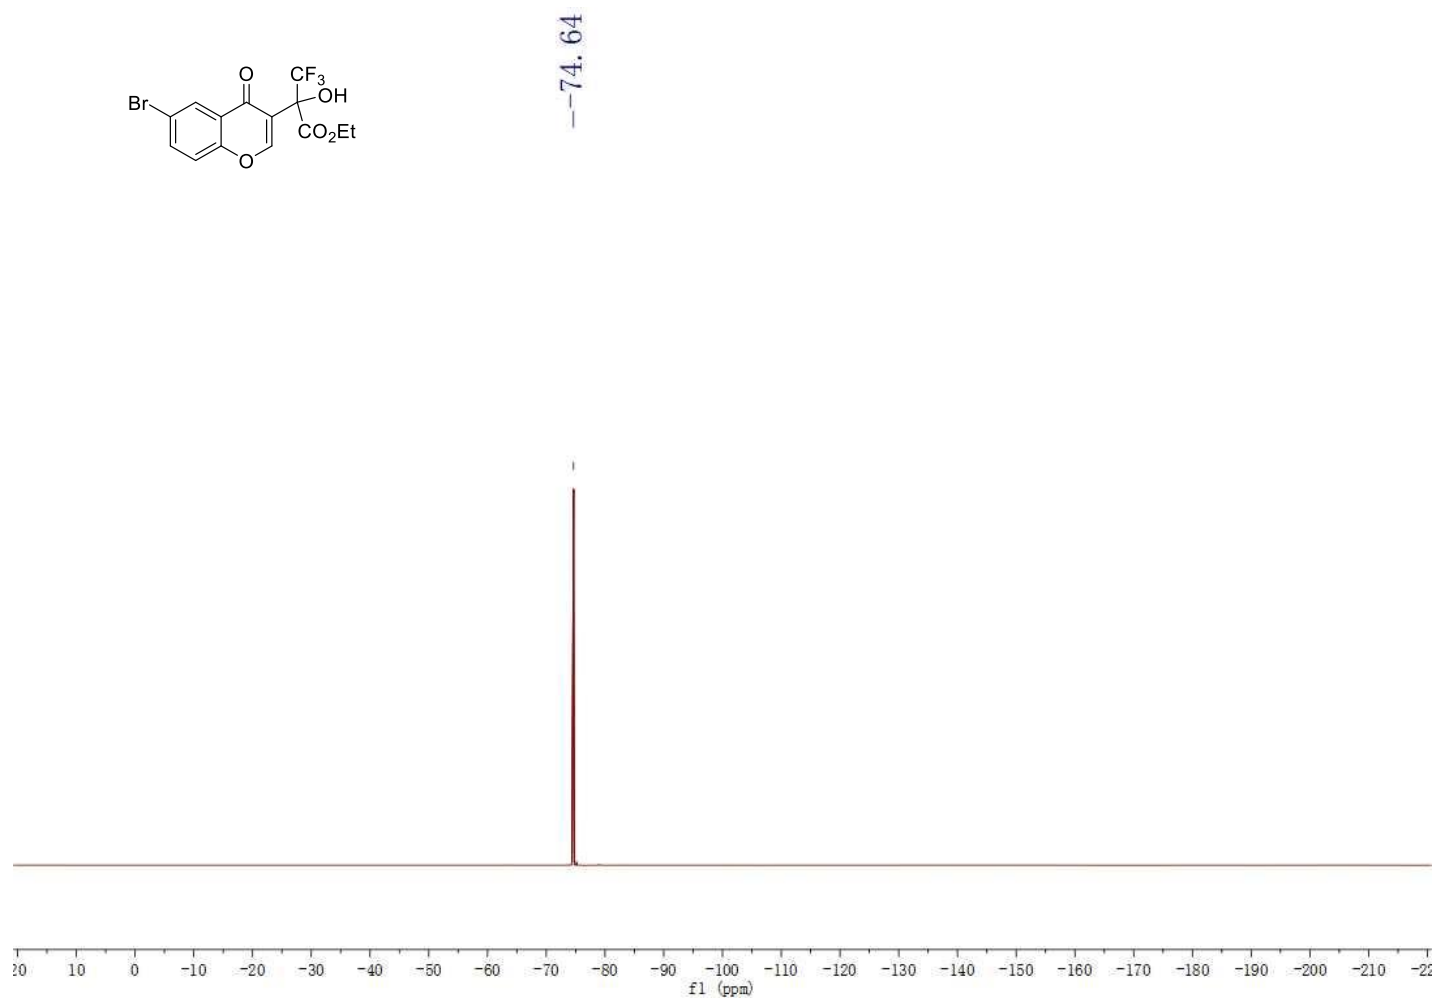

**Fig. S77.**  $^{19}\text{F}$  NMR spectrum of compound **5i**

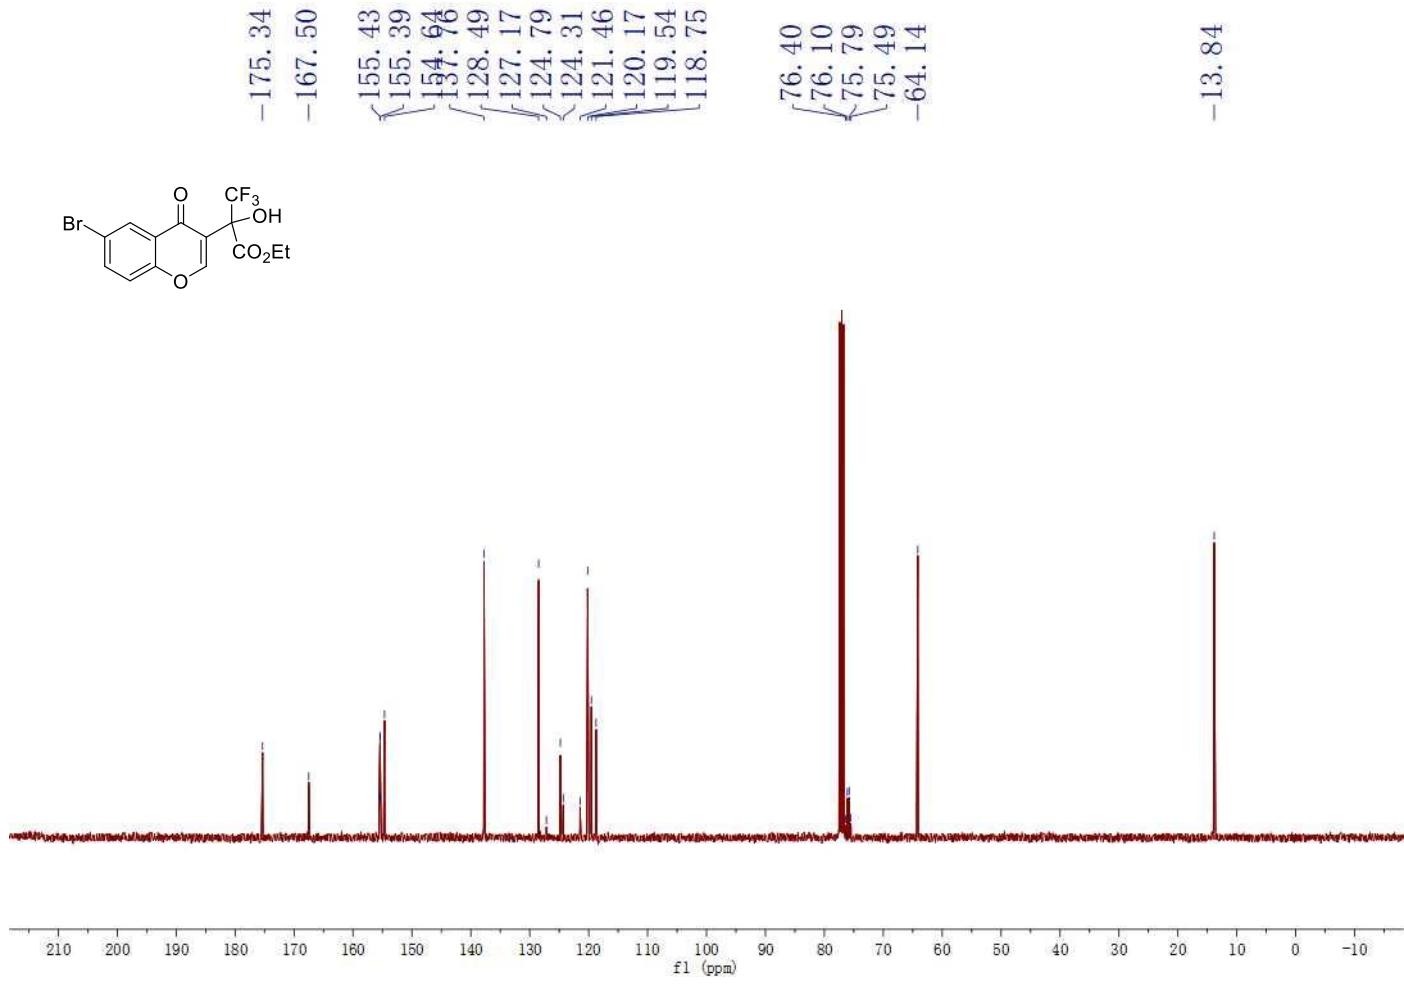

**Fig. S78.** <sup>13</sup>C NMR spectrum of compound **5h**

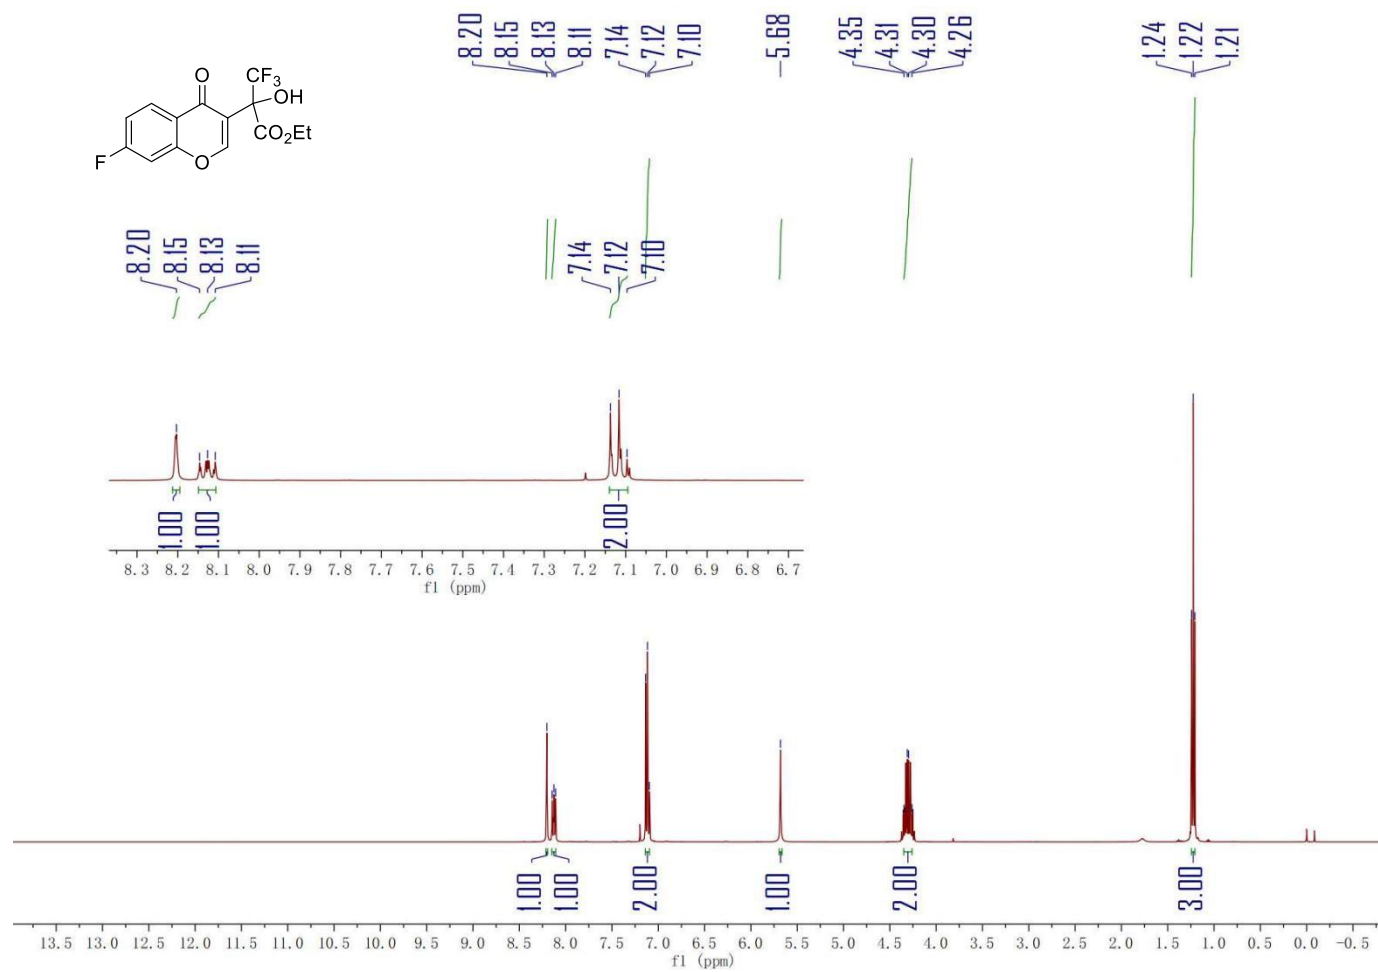

**Fig. S79.** <sup>1</sup>H NMR spectrum of compound **5i**

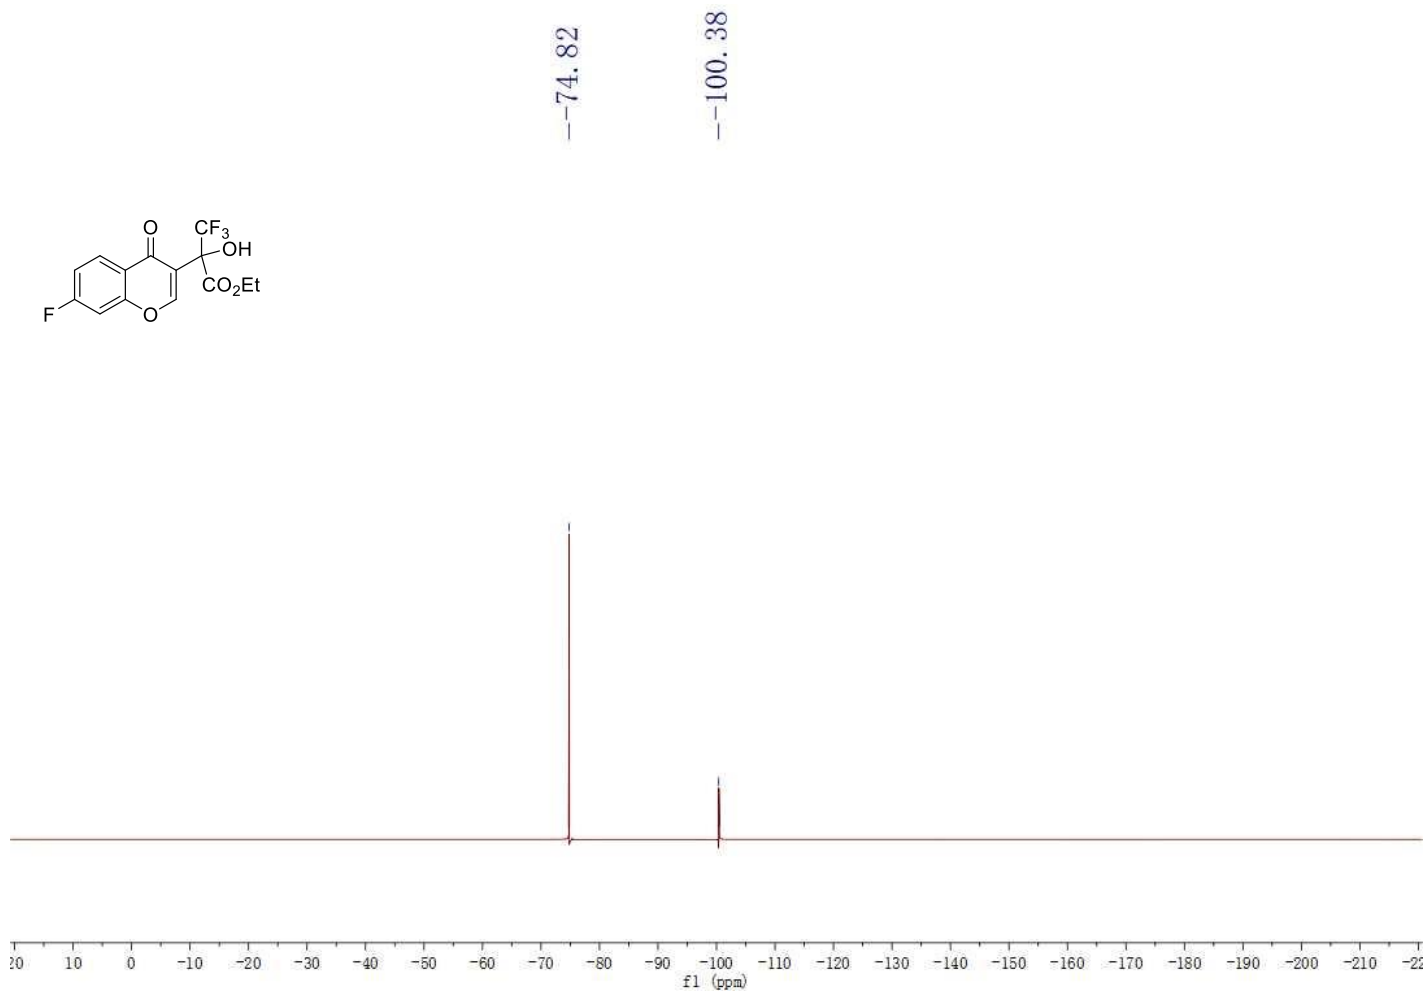

**Fig. S80.**  $^{19}\text{F}$  NMR spectrum of compound **5i**

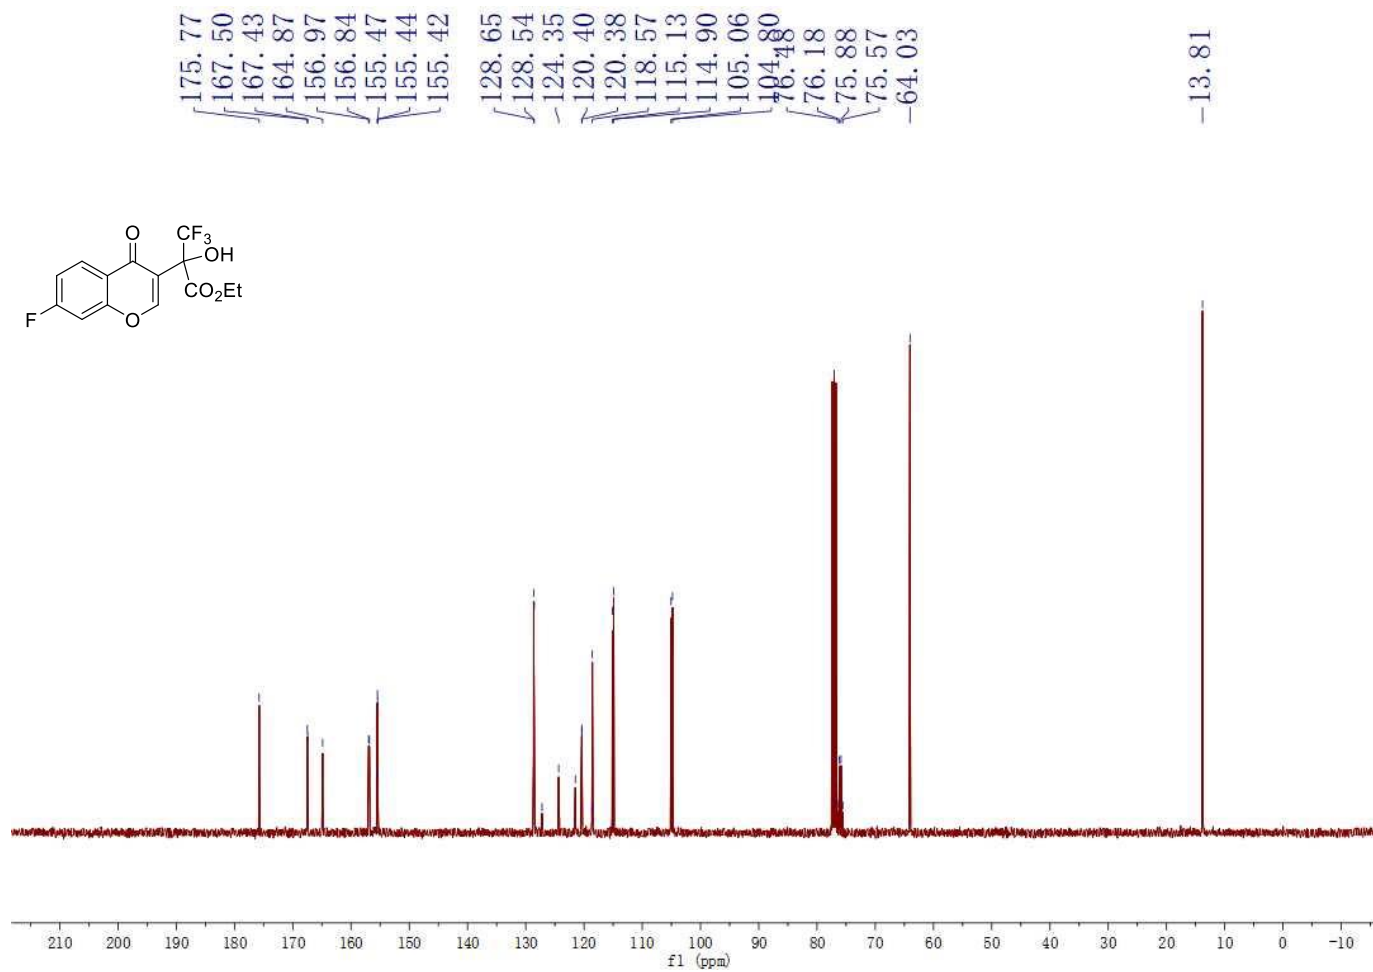

**Fig. S81.** <sup>13</sup>C NMR spectrum of compound **5i**

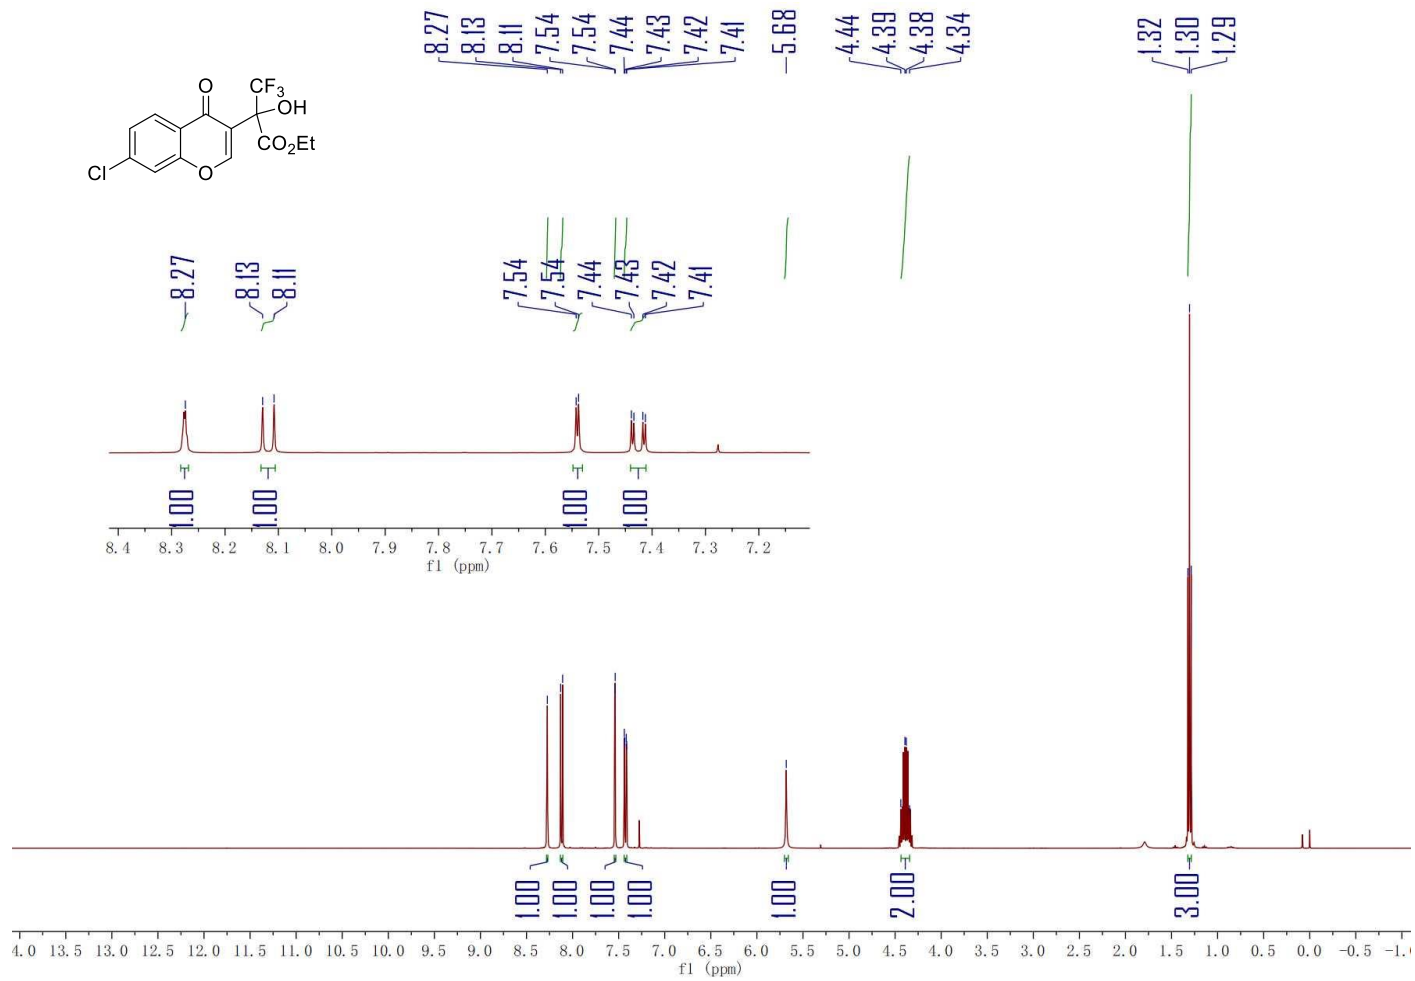

**Fig. S82.** <sup>13</sup>C NMR spectrum of compound **5j**

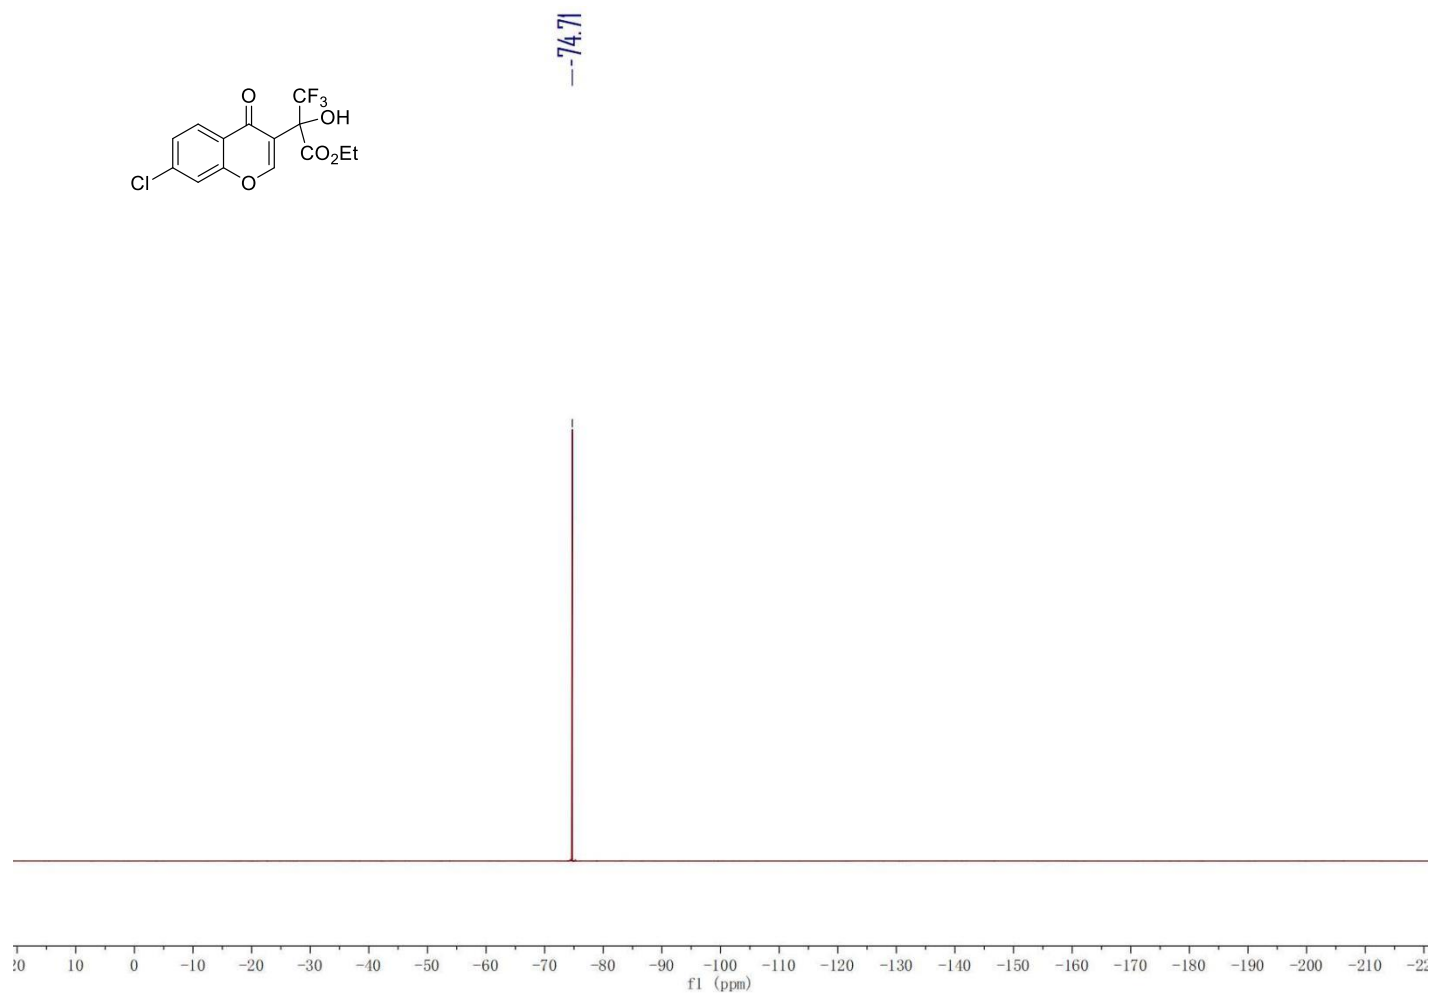

**Fig. S83.** <sup>1</sup>H NMR spectrum of compound 5j



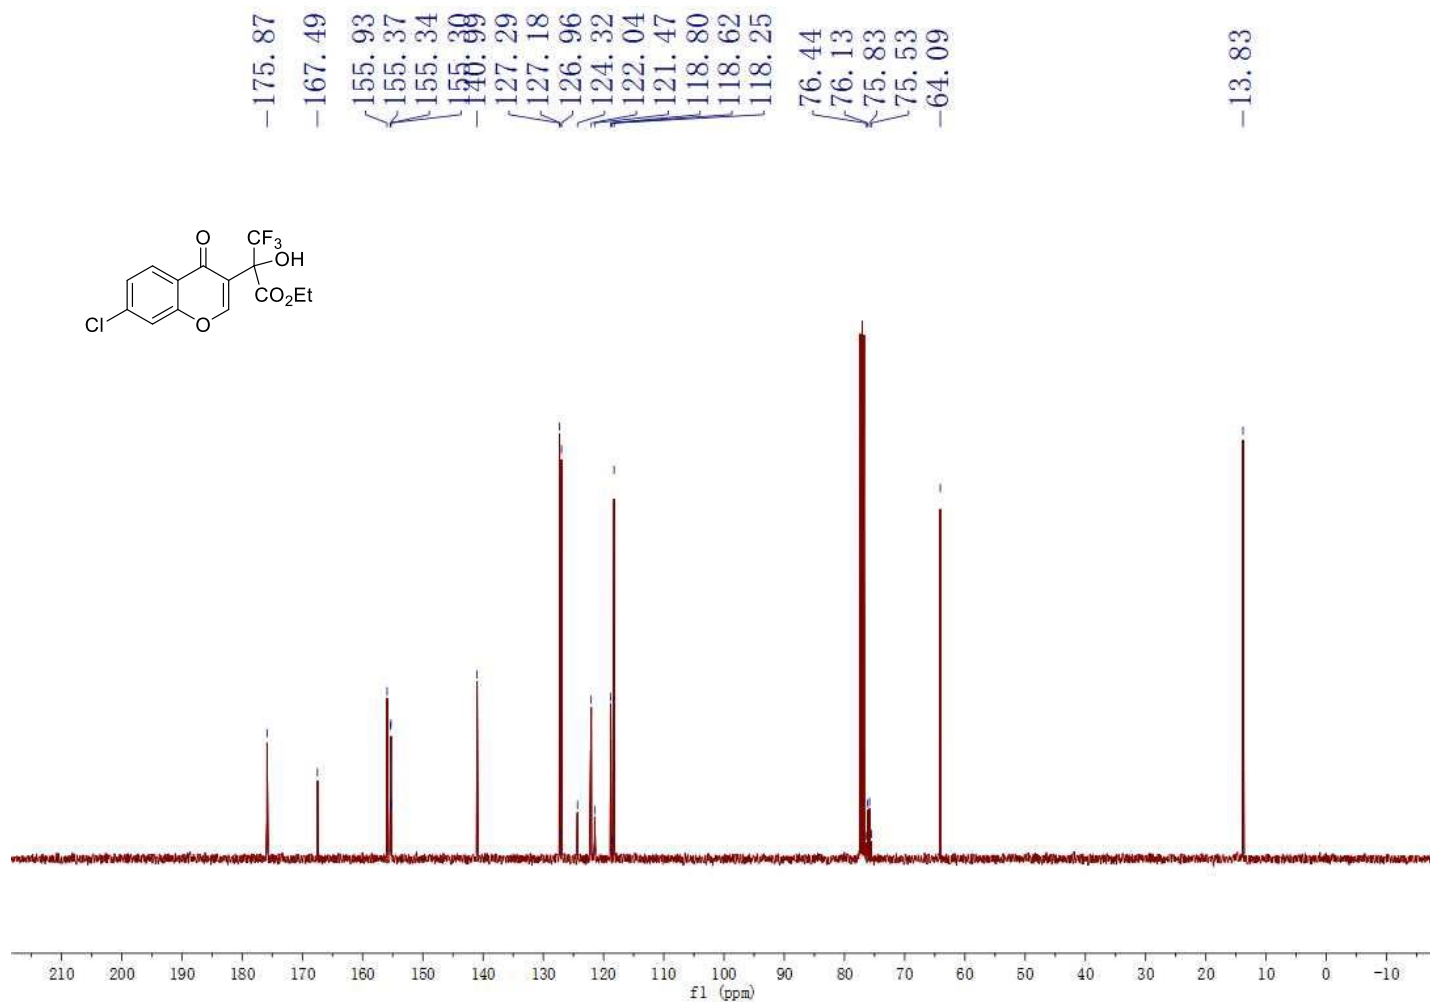

**Fig. S84.** <sup>19</sup>F NMR spectrum of compound **5j**

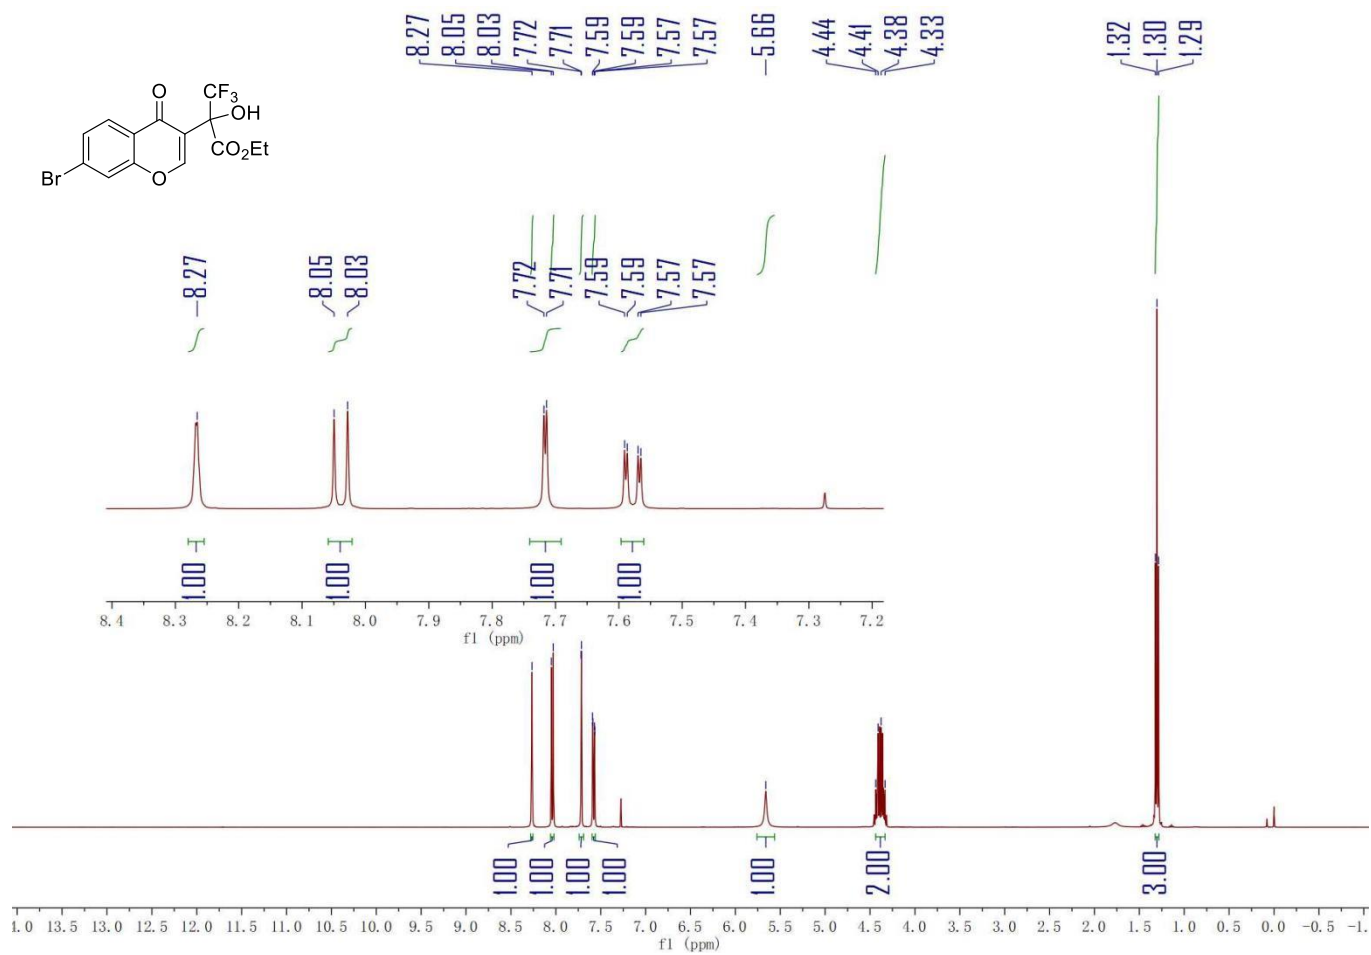

**Fig. S85.** <sup>1</sup>H NMR spectrum of compound **5k**

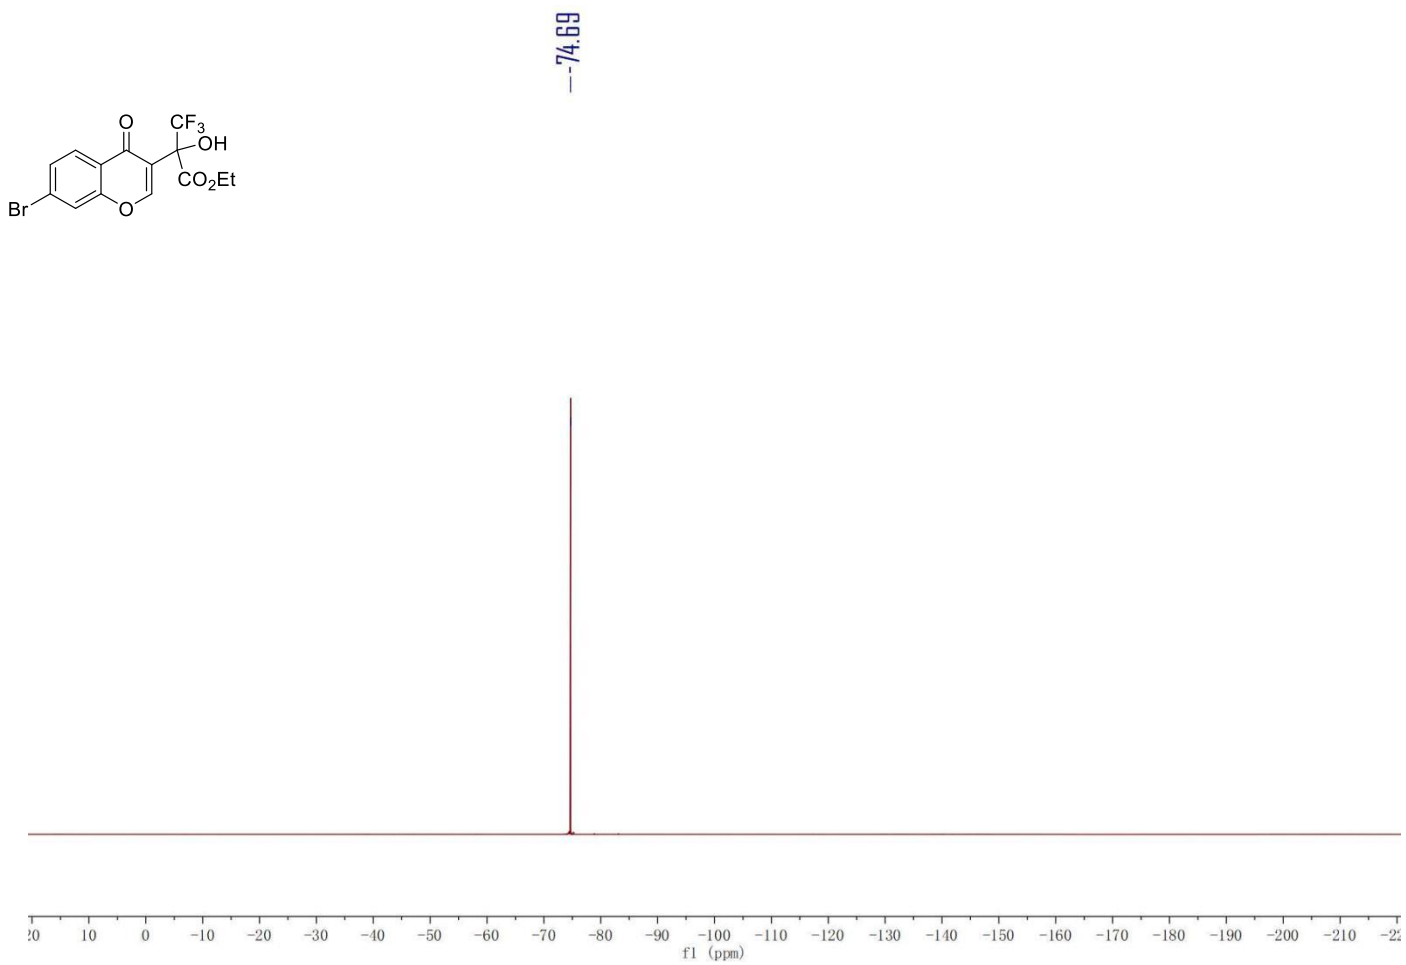

**Fig. S86.**  $^{19}\text{F}$  NMR spectrum of compound **5k**

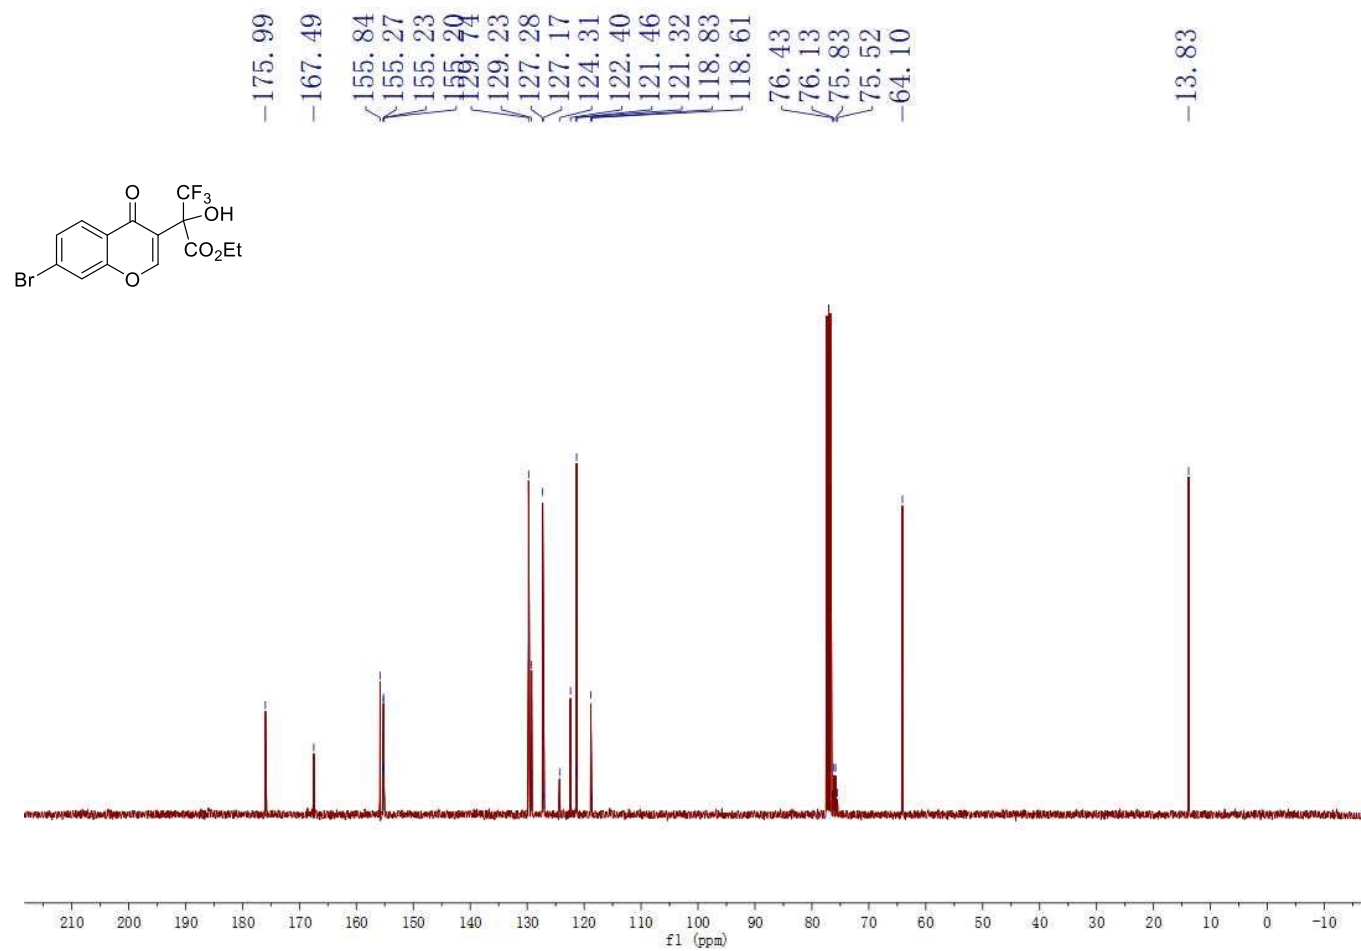

Fig. S87.  $^{13}\text{C}$  NMR spectrum of compound 5k

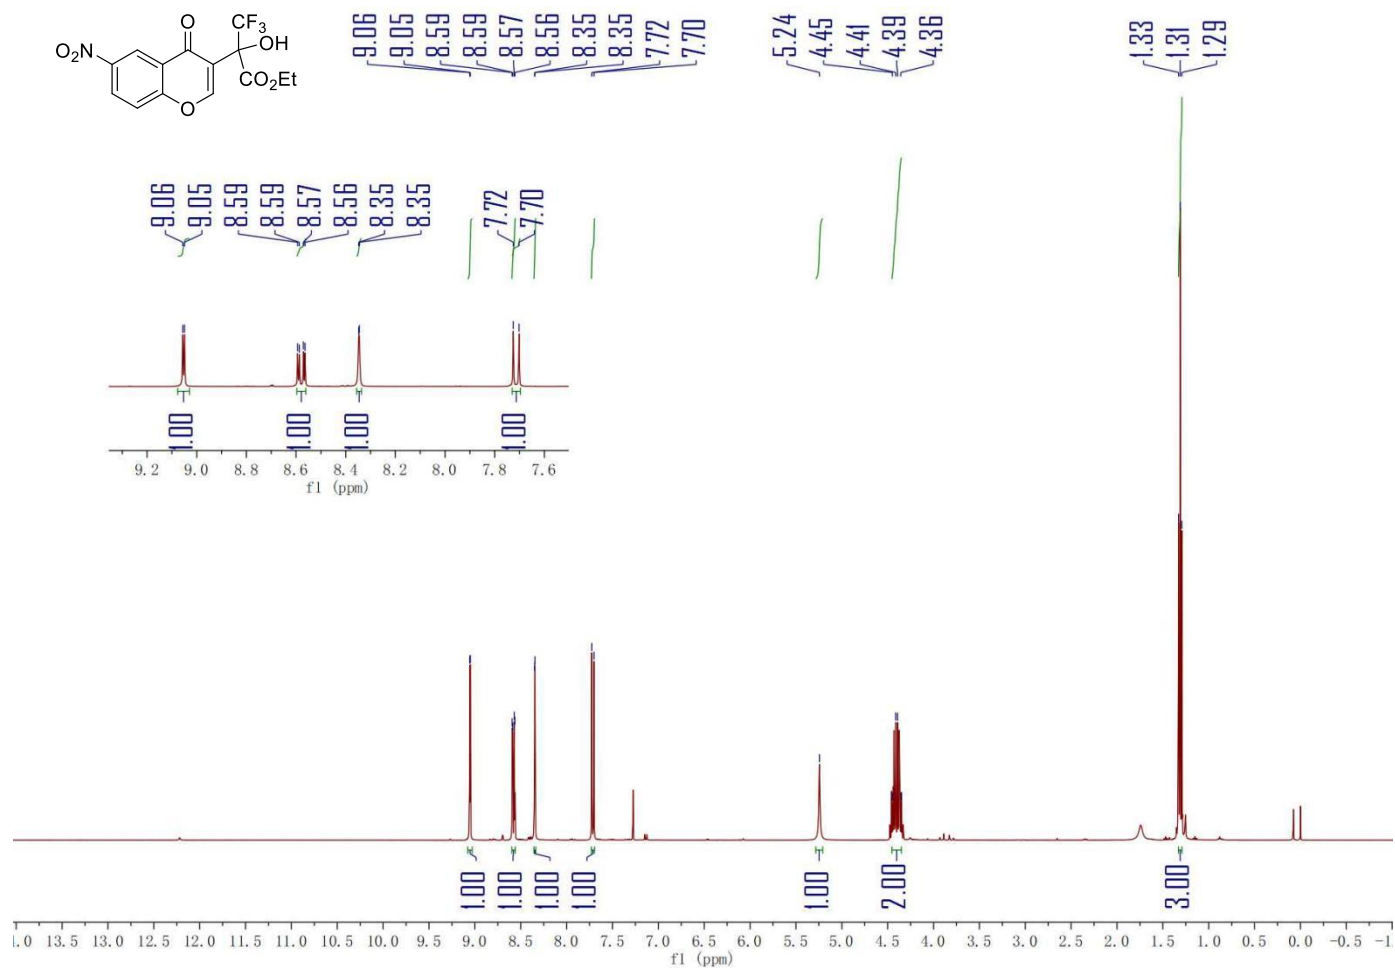

**Fig. S88.**  $^1\text{H}$  NMR spectrum of compound **5I**

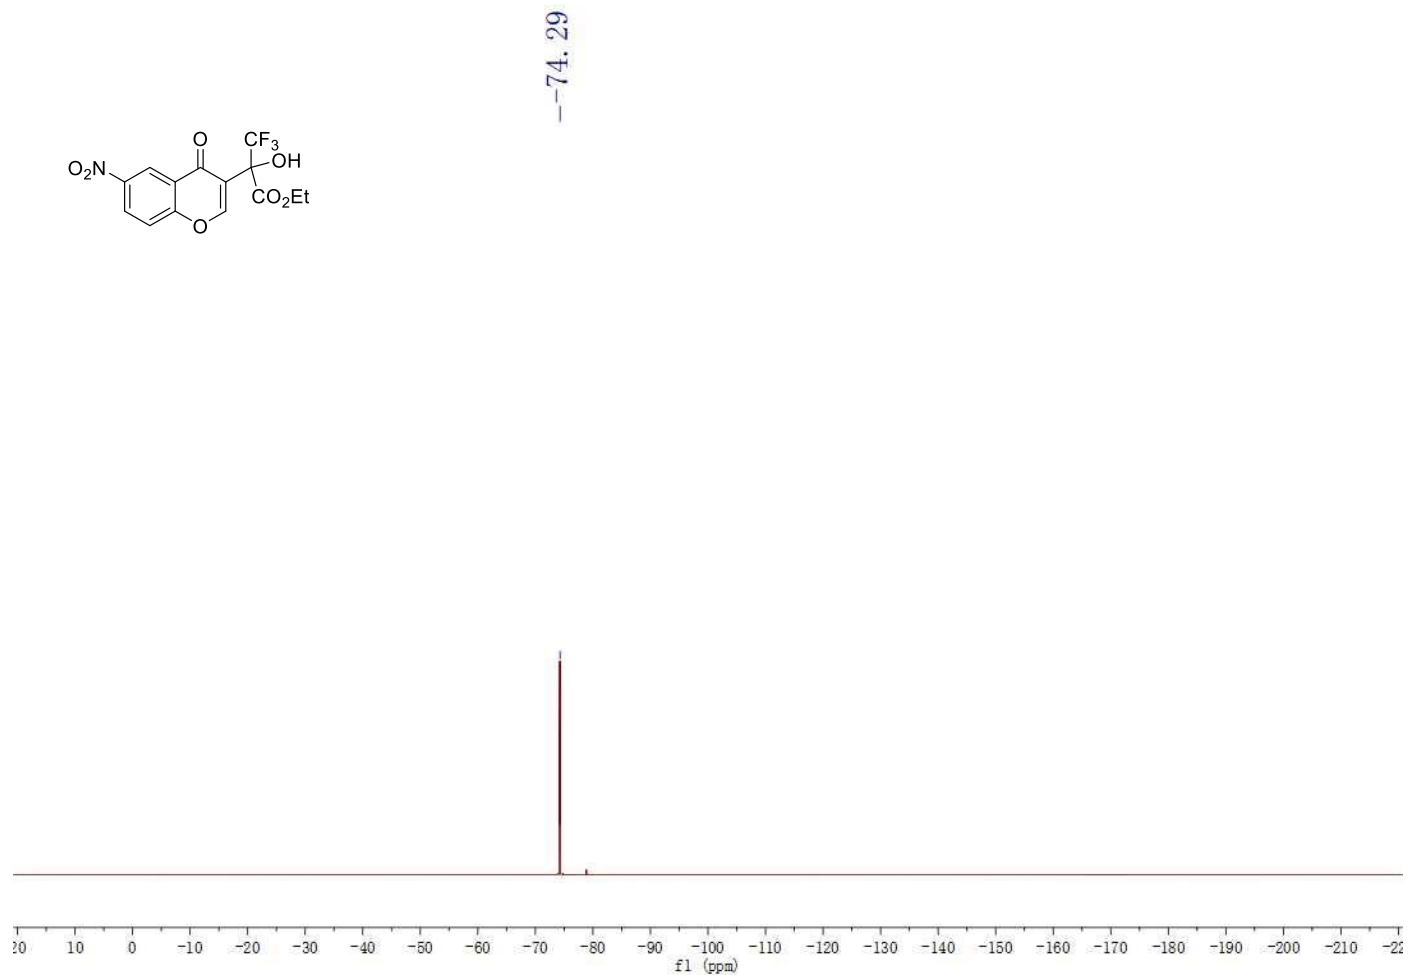

**Fig. S89.**  $^{19}\text{F}$  NMR spectrum of compound **5I**

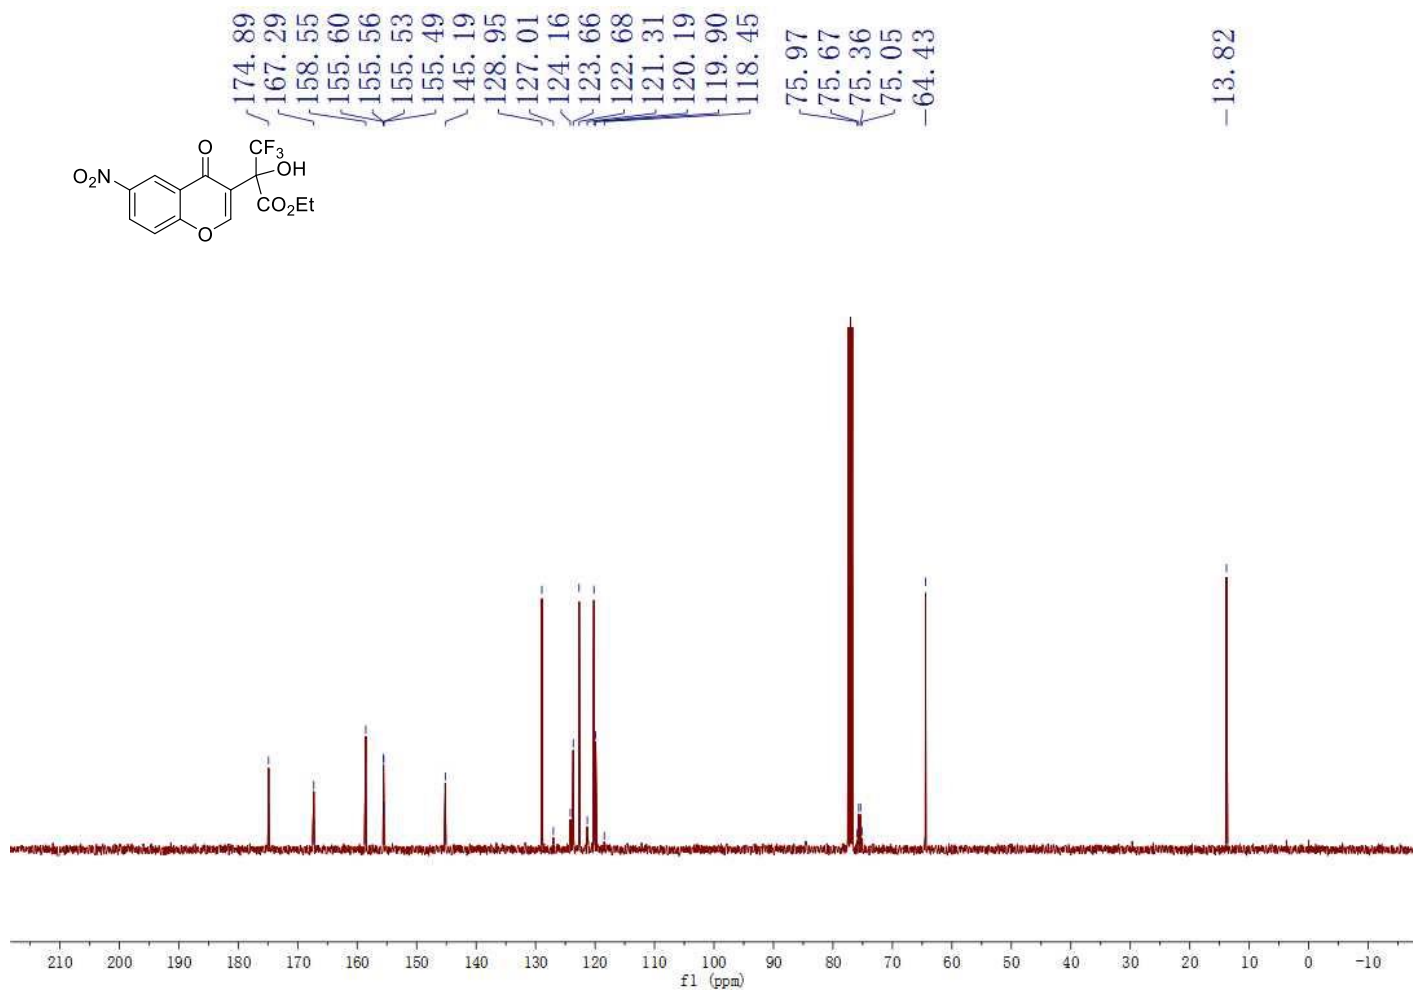

Fig. S90. <sup>13</sup>C NMR spectrum of compound 51

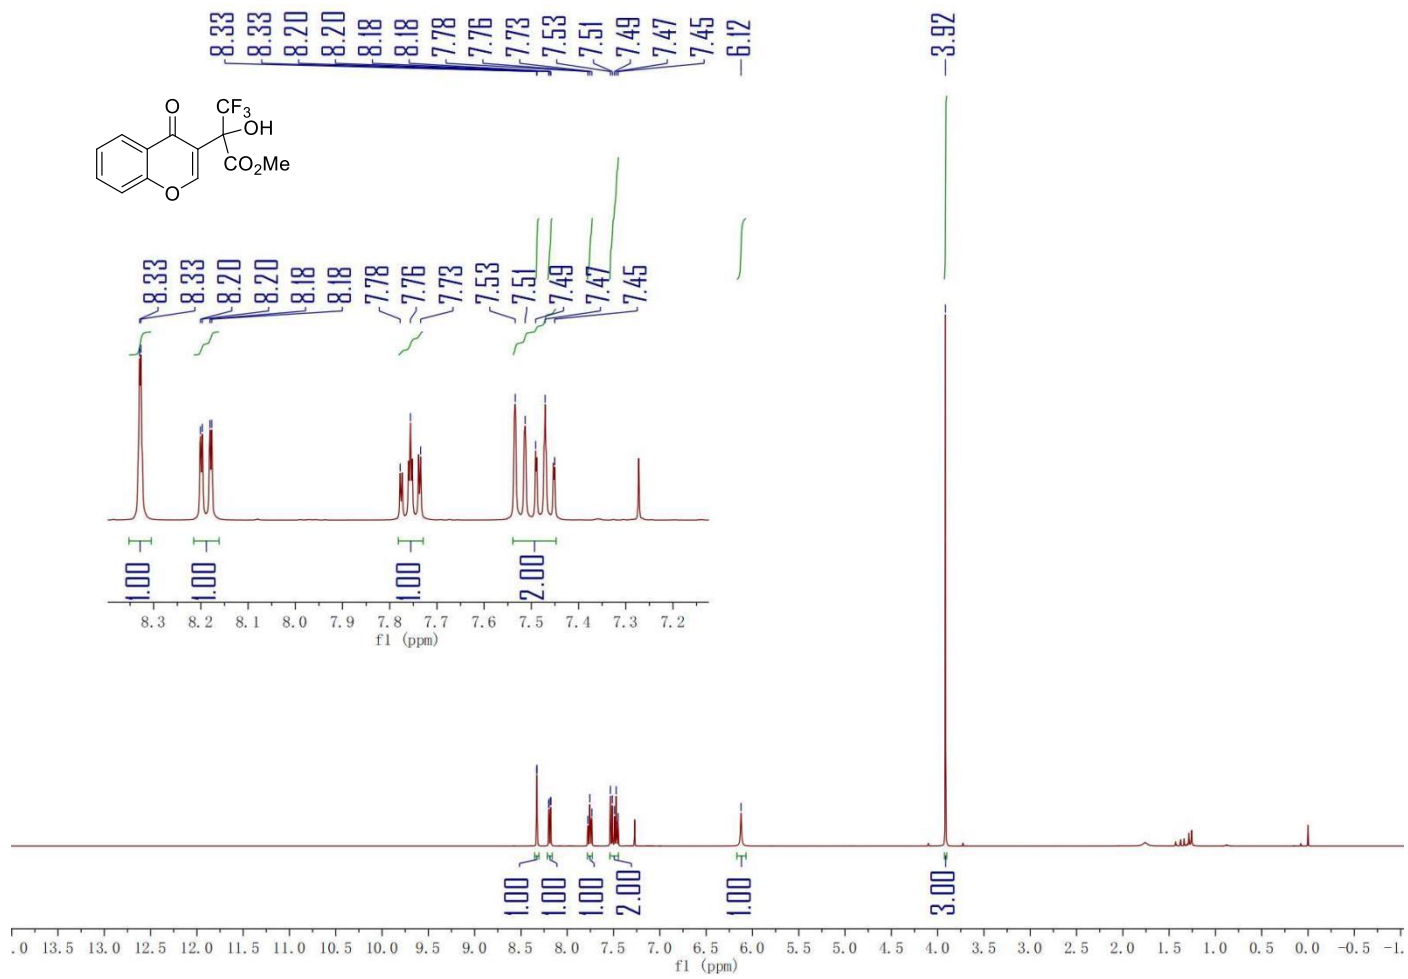

**Fig. S91.**  $^1\text{H}$  NMR spectrum of compound **5m**



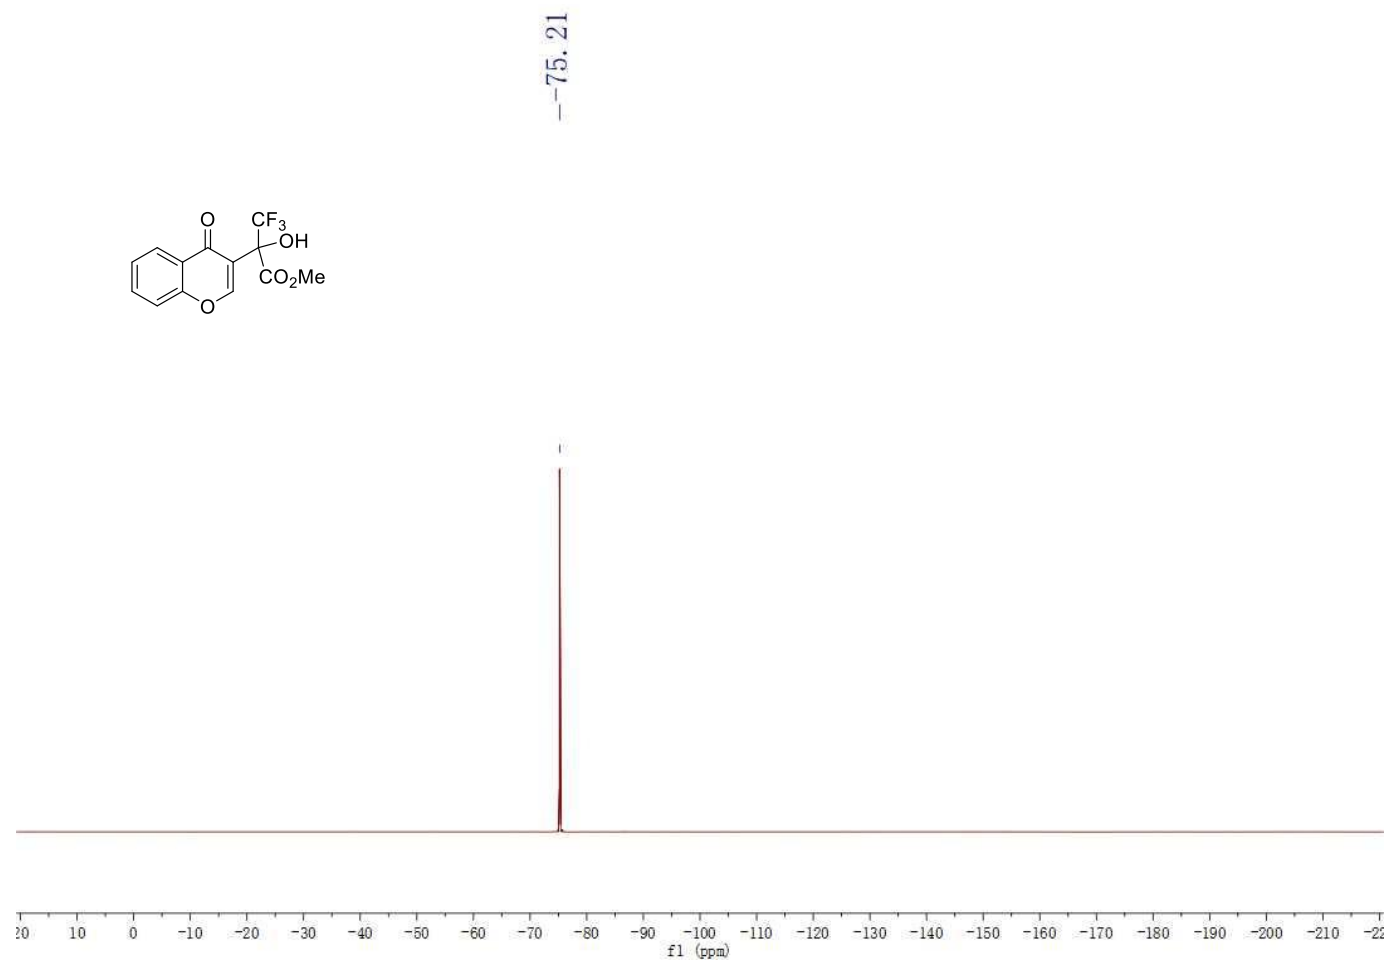

**Fig. S92.**  $^{19}\text{F}$  NMR spectrum of compound **5m**

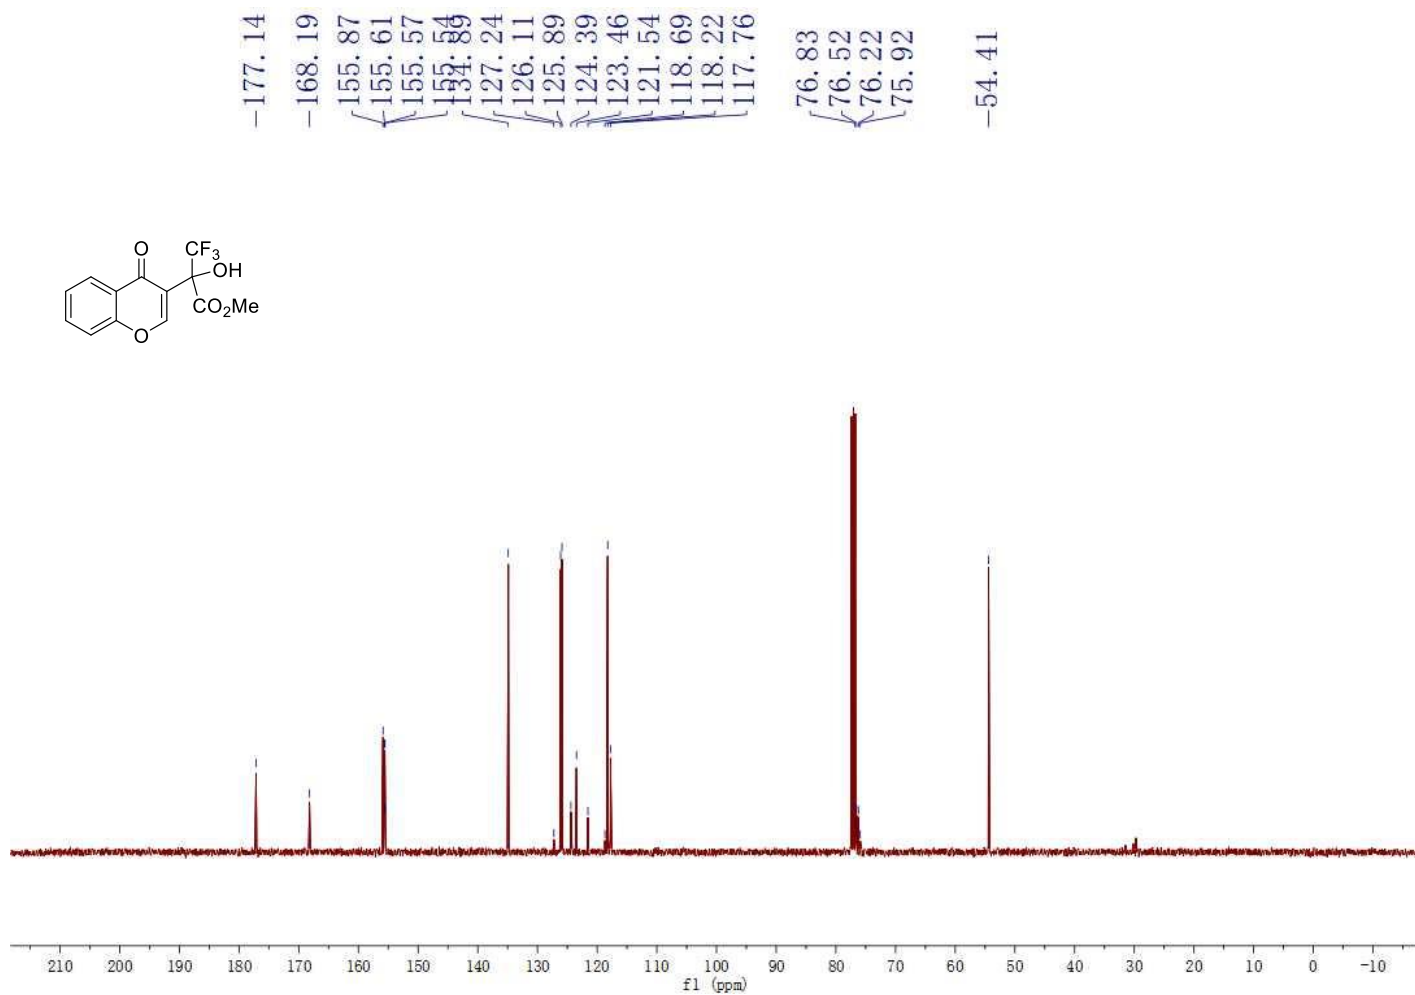

Fig. S93. <sup>13</sup>C NMR spectrum of compound 5m

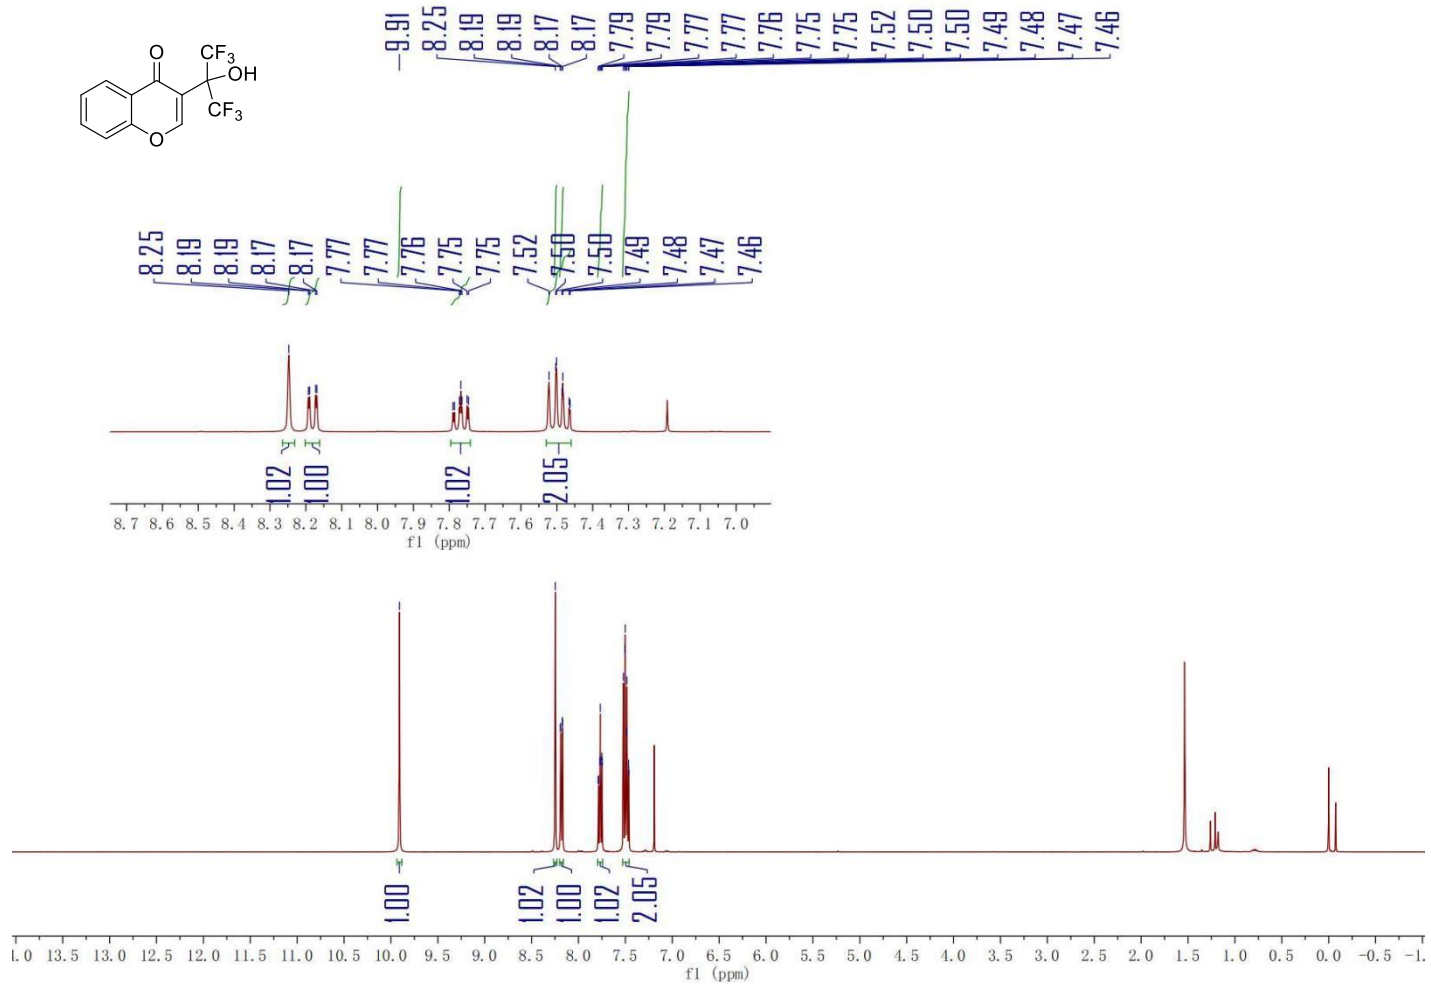

**Fig. S94.**  $^1\text{H}$  NMR spectrum of compound **5n**

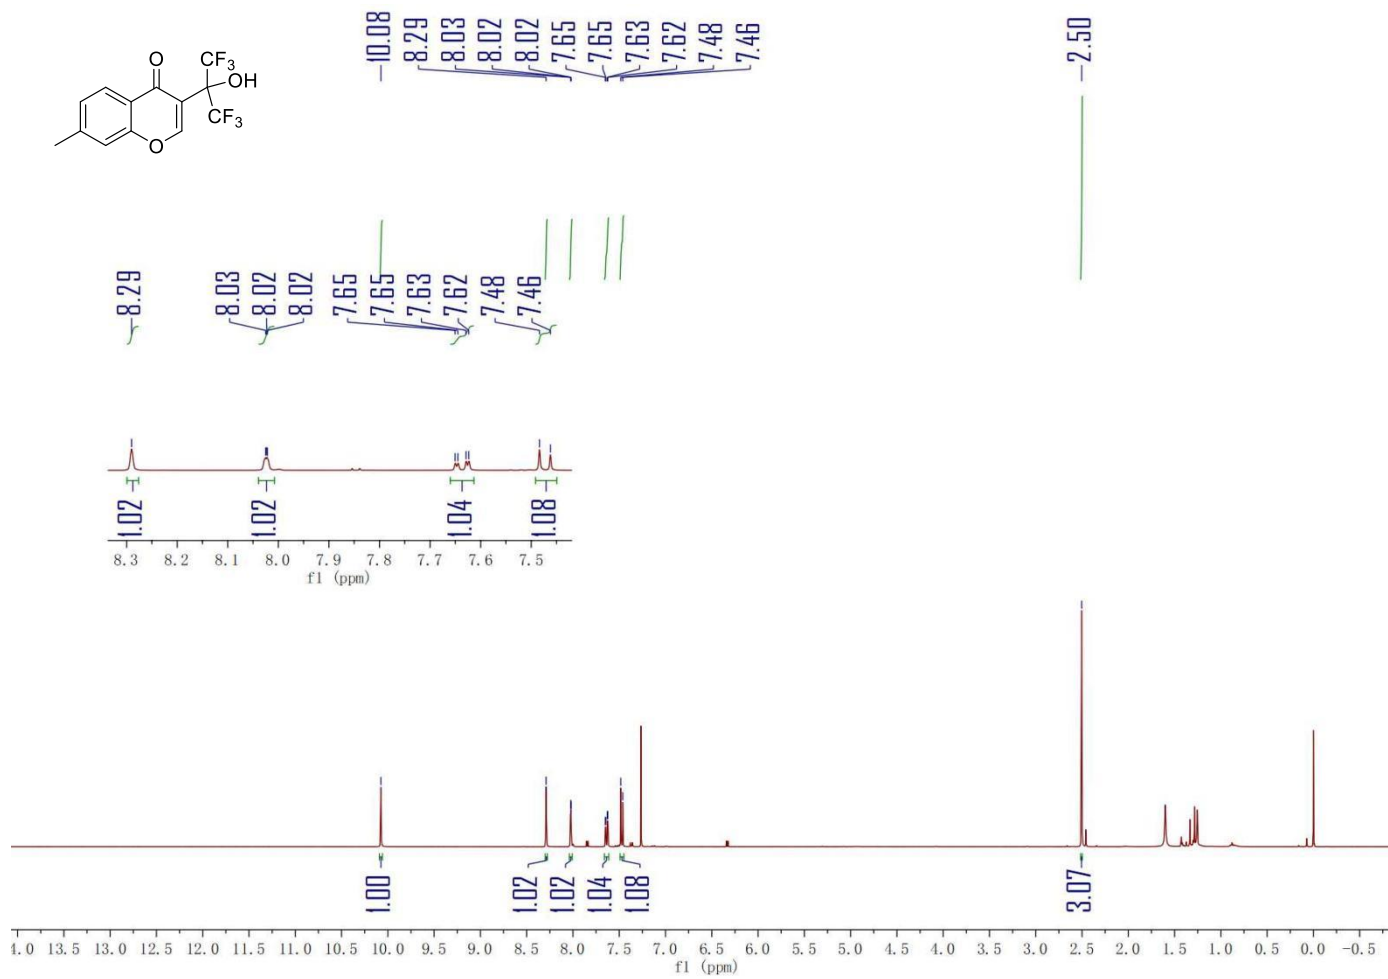

Fig. S95. <sup>1</sup>H NMR spectrum of compound **5o**

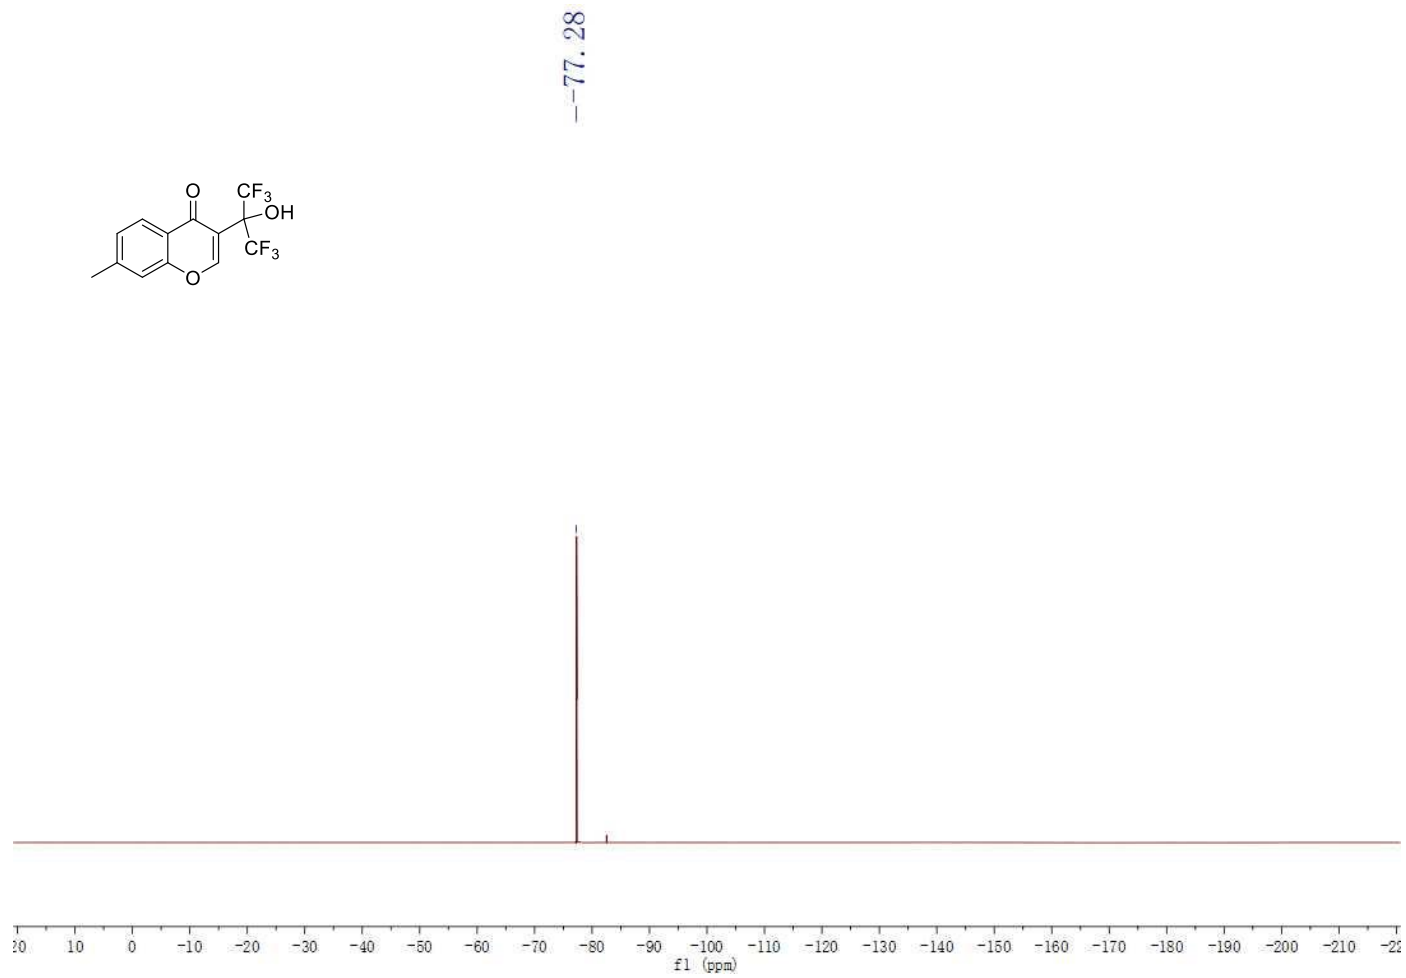

**Fig. S96.**  $^{19}\text{F}$  NMR spectrum of compound **50**

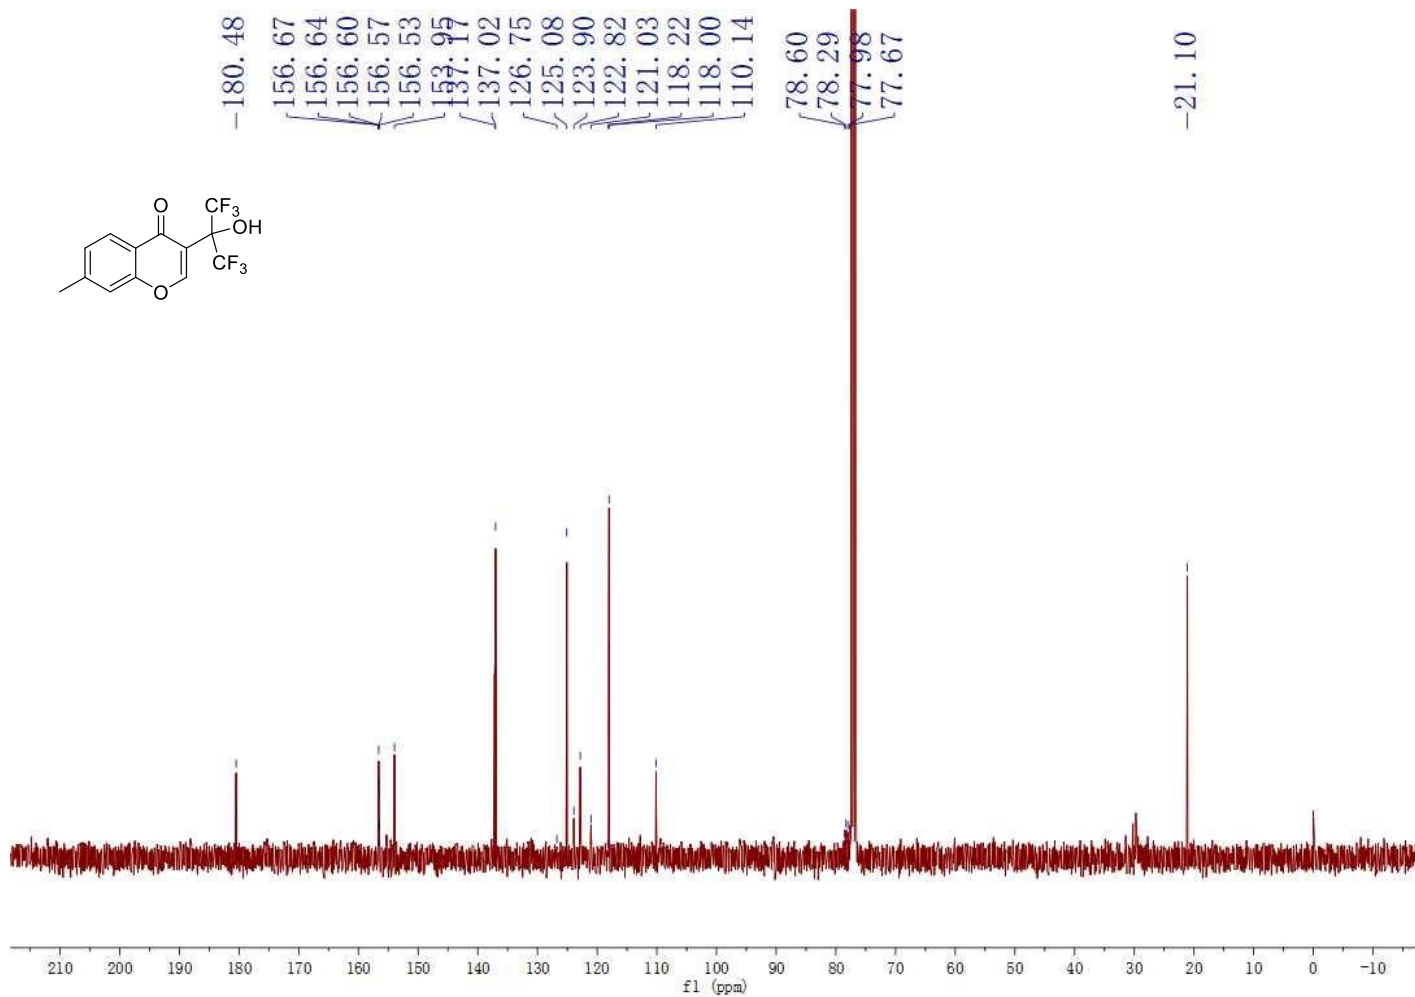

Fig. S97.  $^{13}\text{C}$  NMR spectrum of compound 50

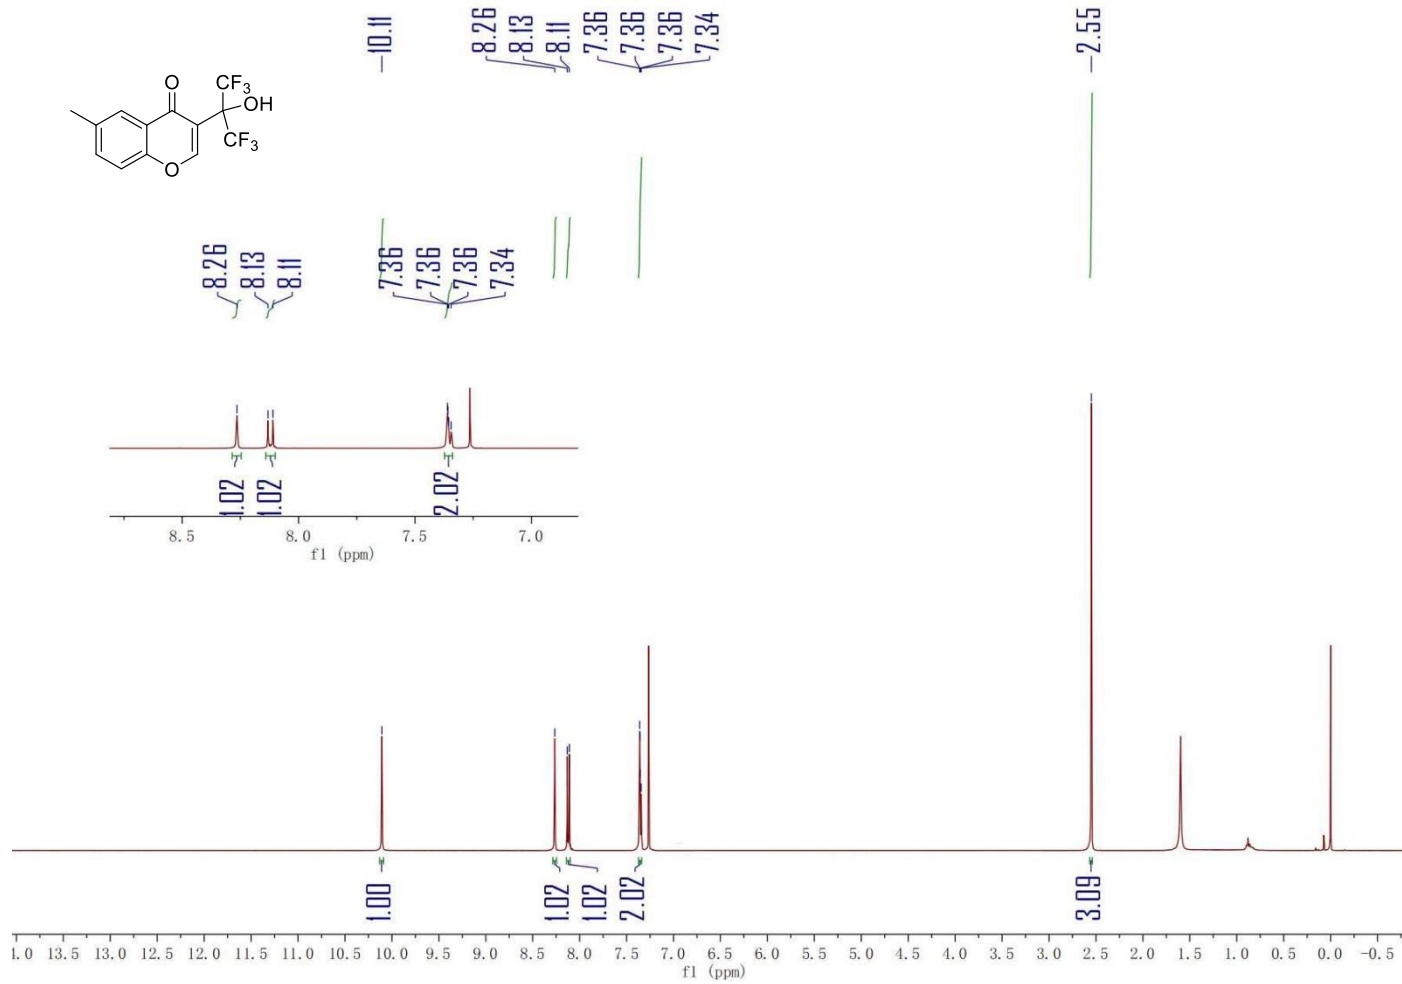

Fig. S98. <sup>1</sup>H NMR spectrum of compound 5p

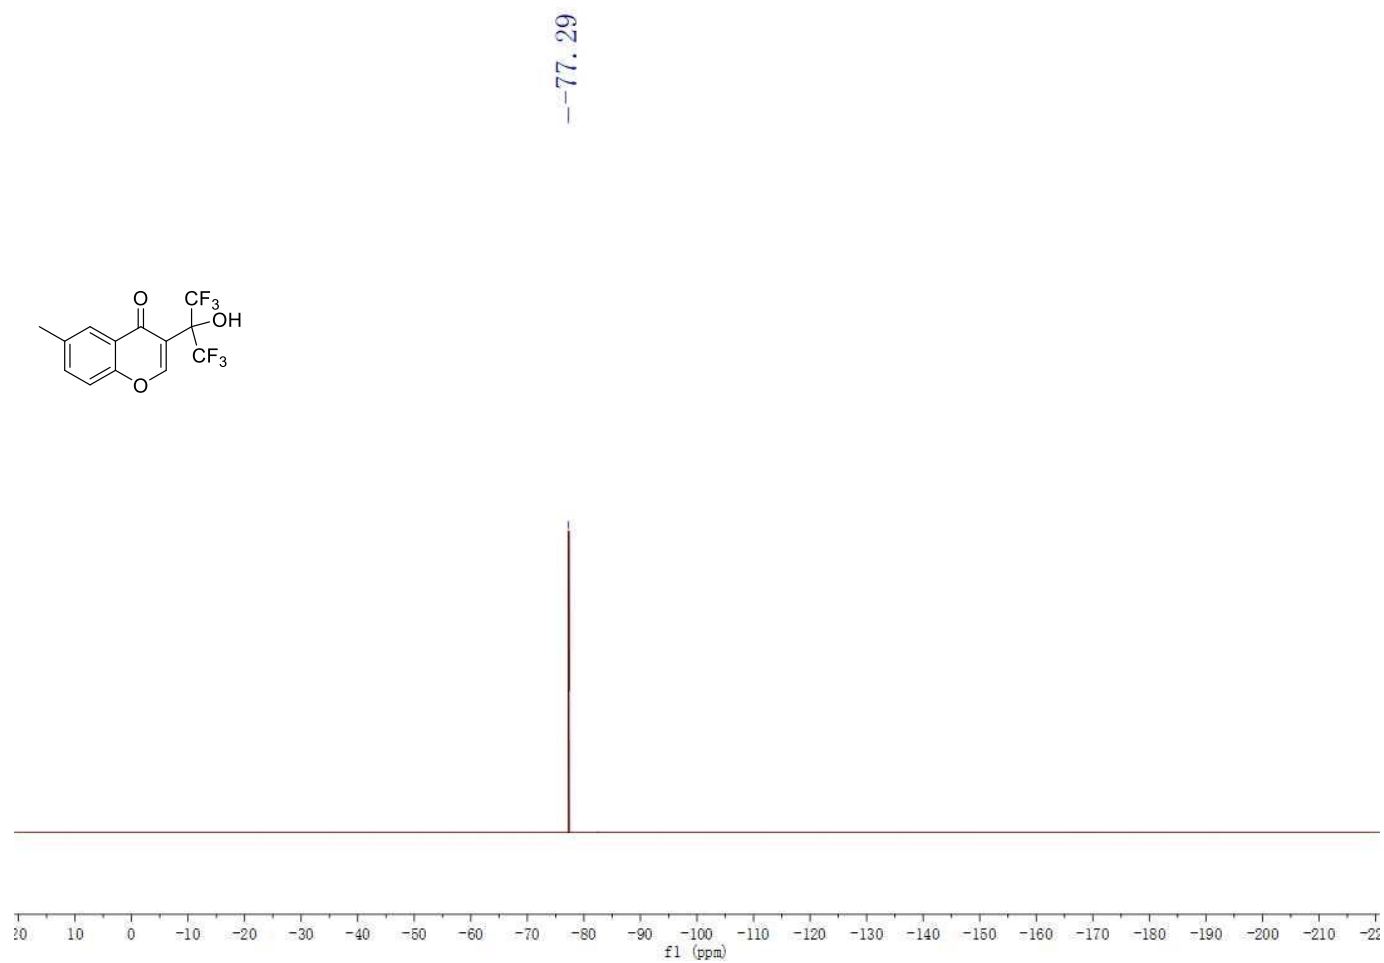

**Fig. S99.**  $^{19}\text{F}$  NMR spectrum of compound **5p**



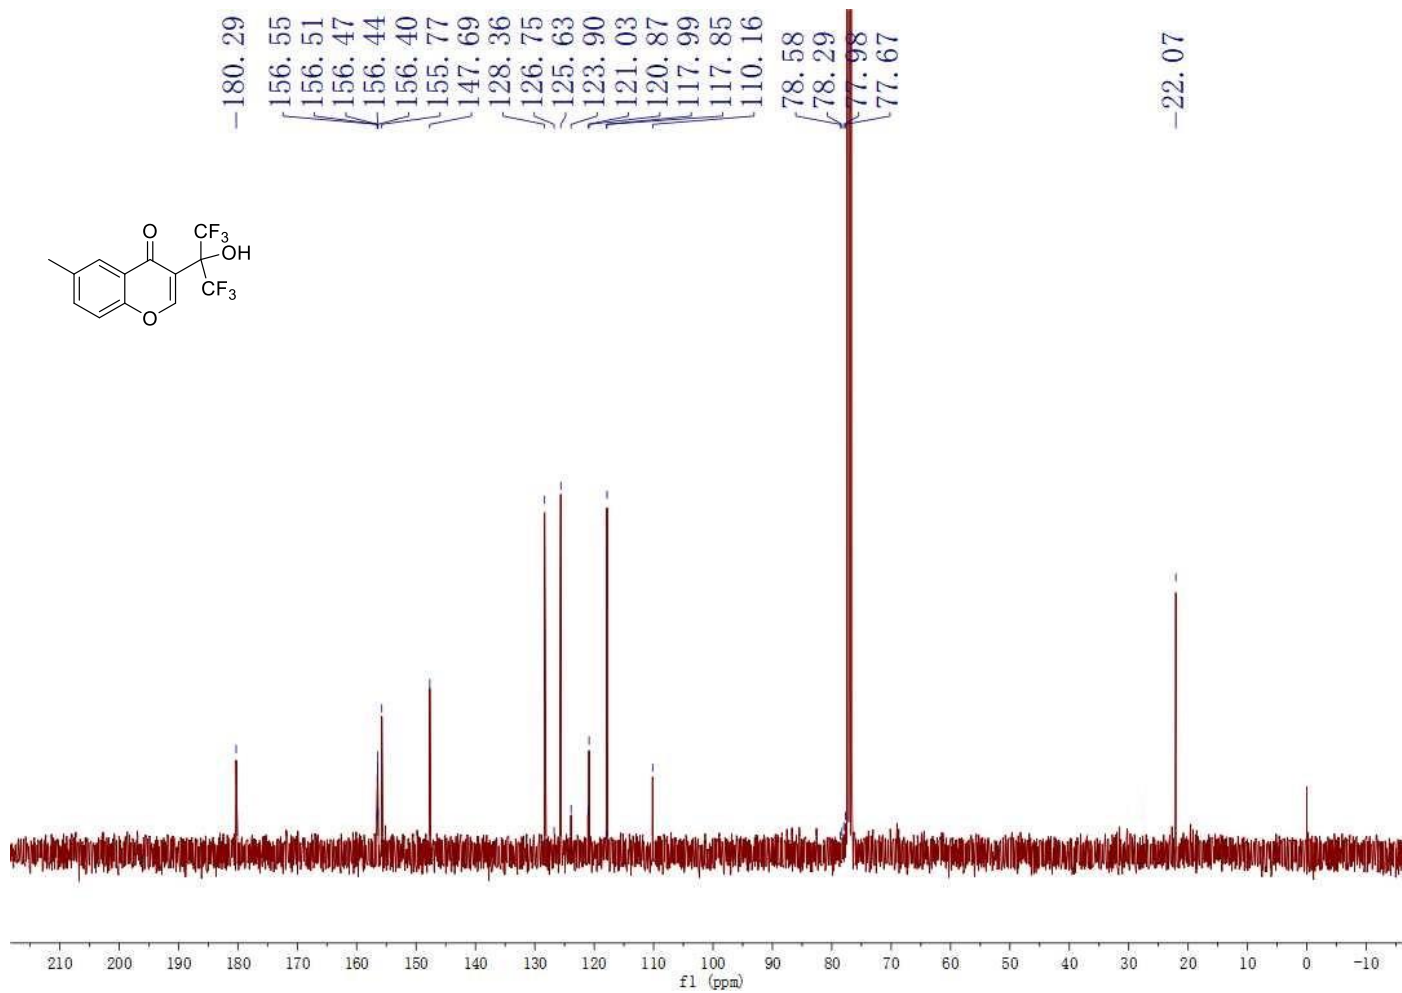

**Fig. S100.** <sup>13</sup>C NMR spectrum of compound 5p

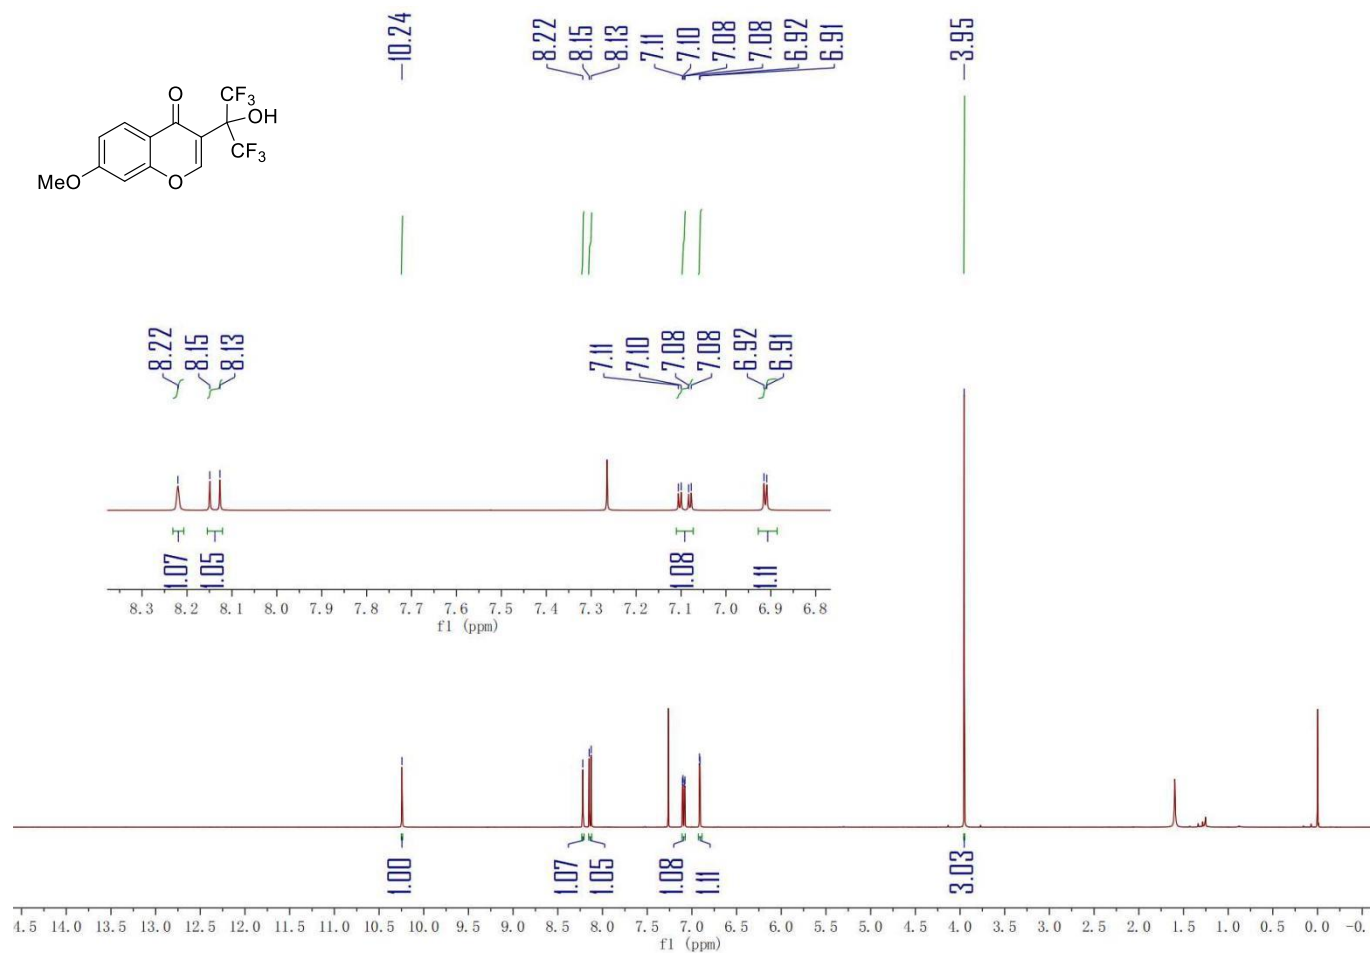

Fig. S101. <sup>1</sup>H NMR spectrum of compound **5q**

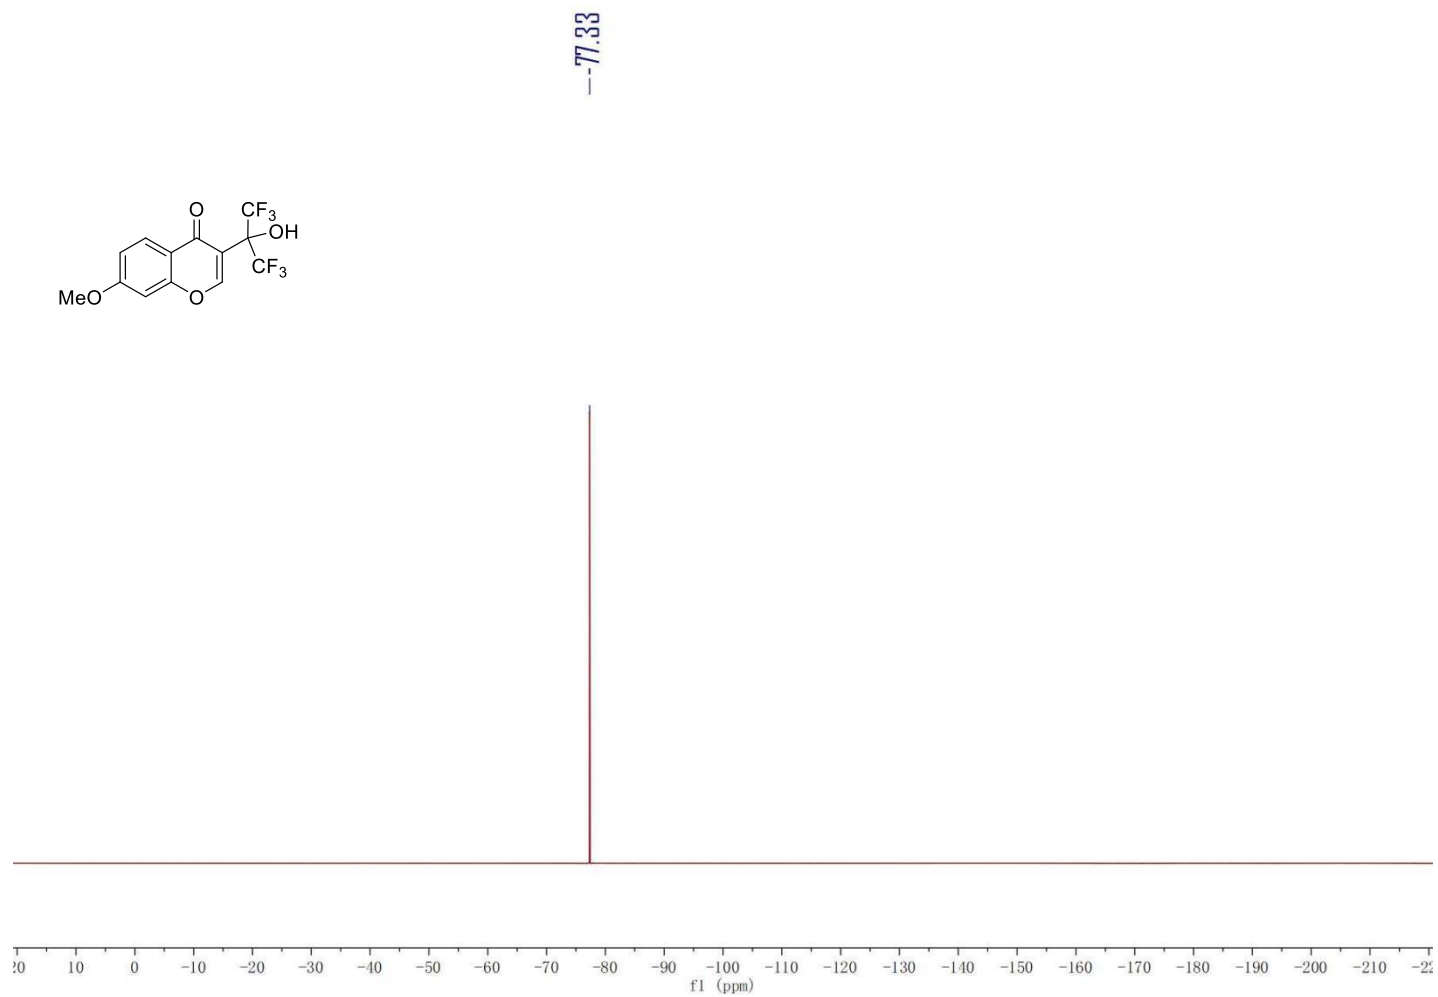

**Fig. S102.**  $^{19}\text{F}$  NMR spectrum of compound **5q**

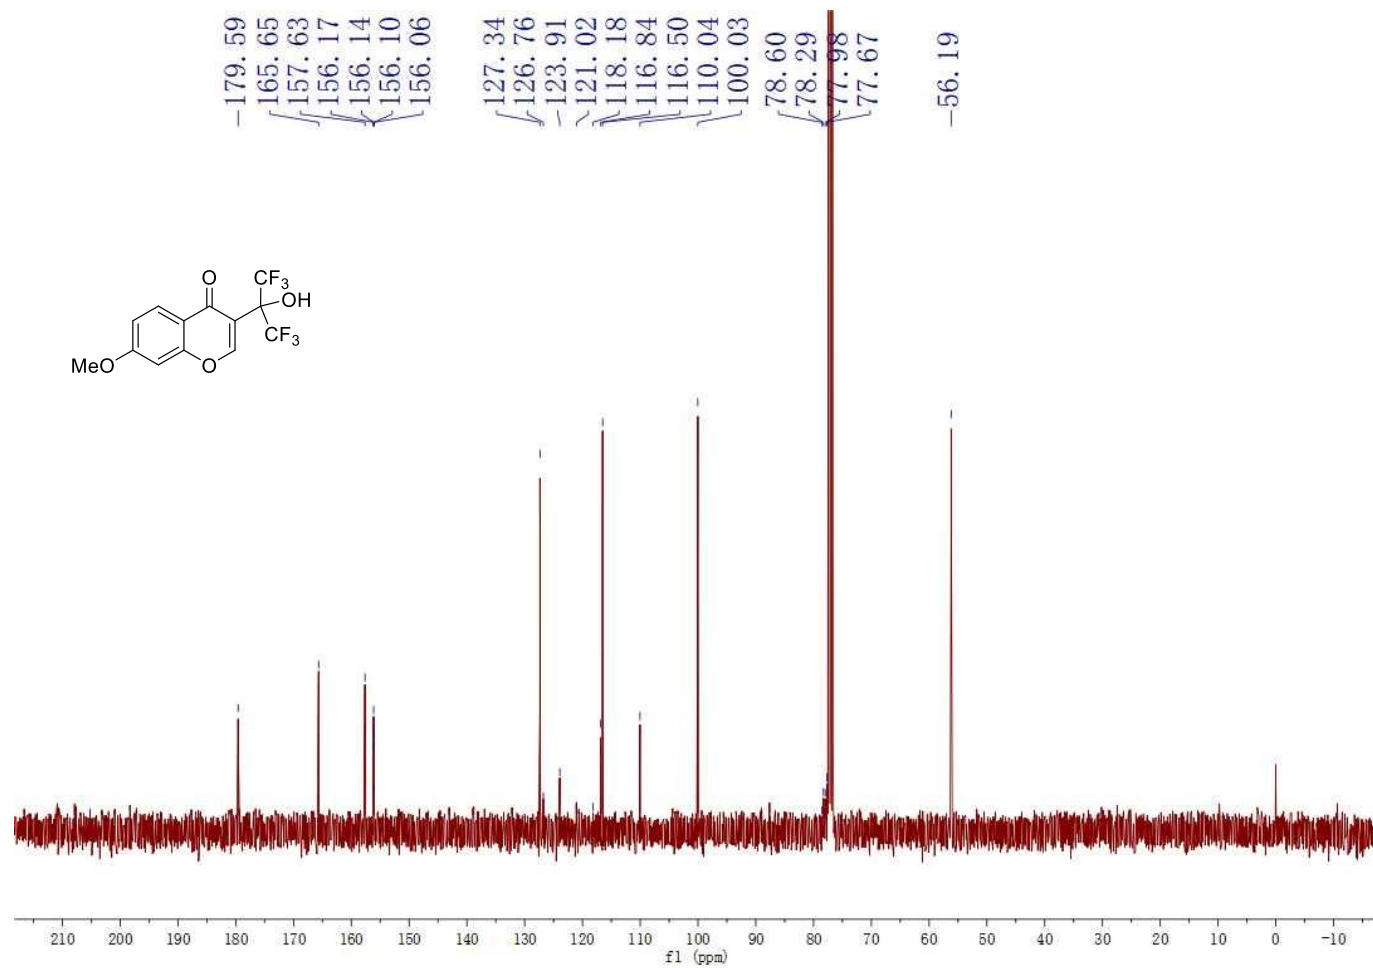

Fig. S103. <sup>13</sup>C NMR spectrum of compound 5q

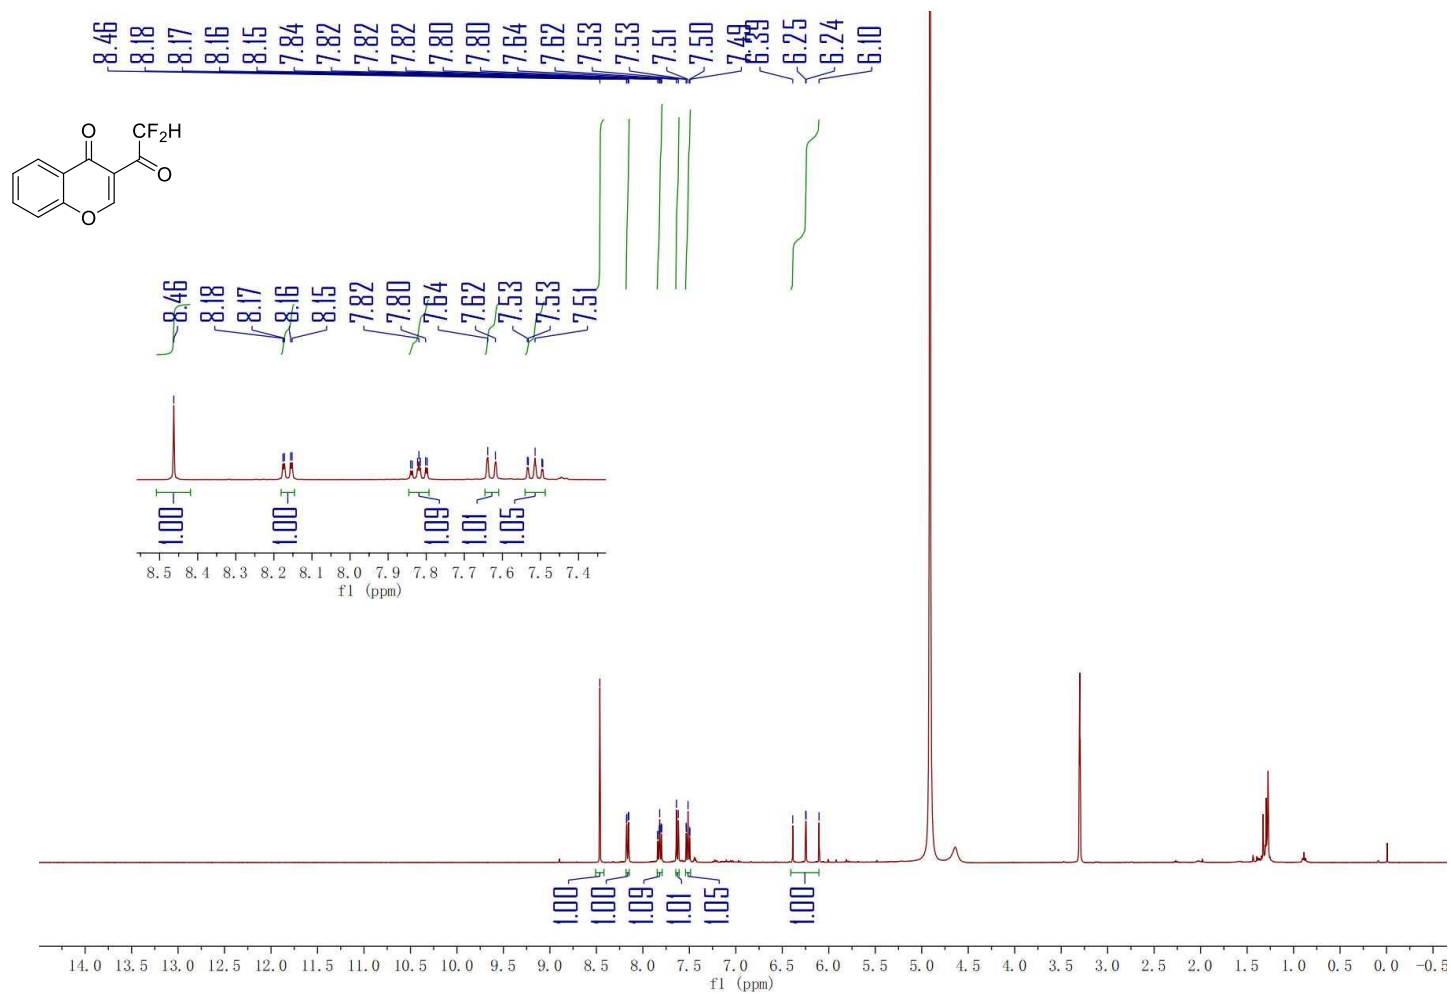

Fig. S104.  $^1\text{H}$  NMR spectrum of compound 6a

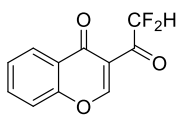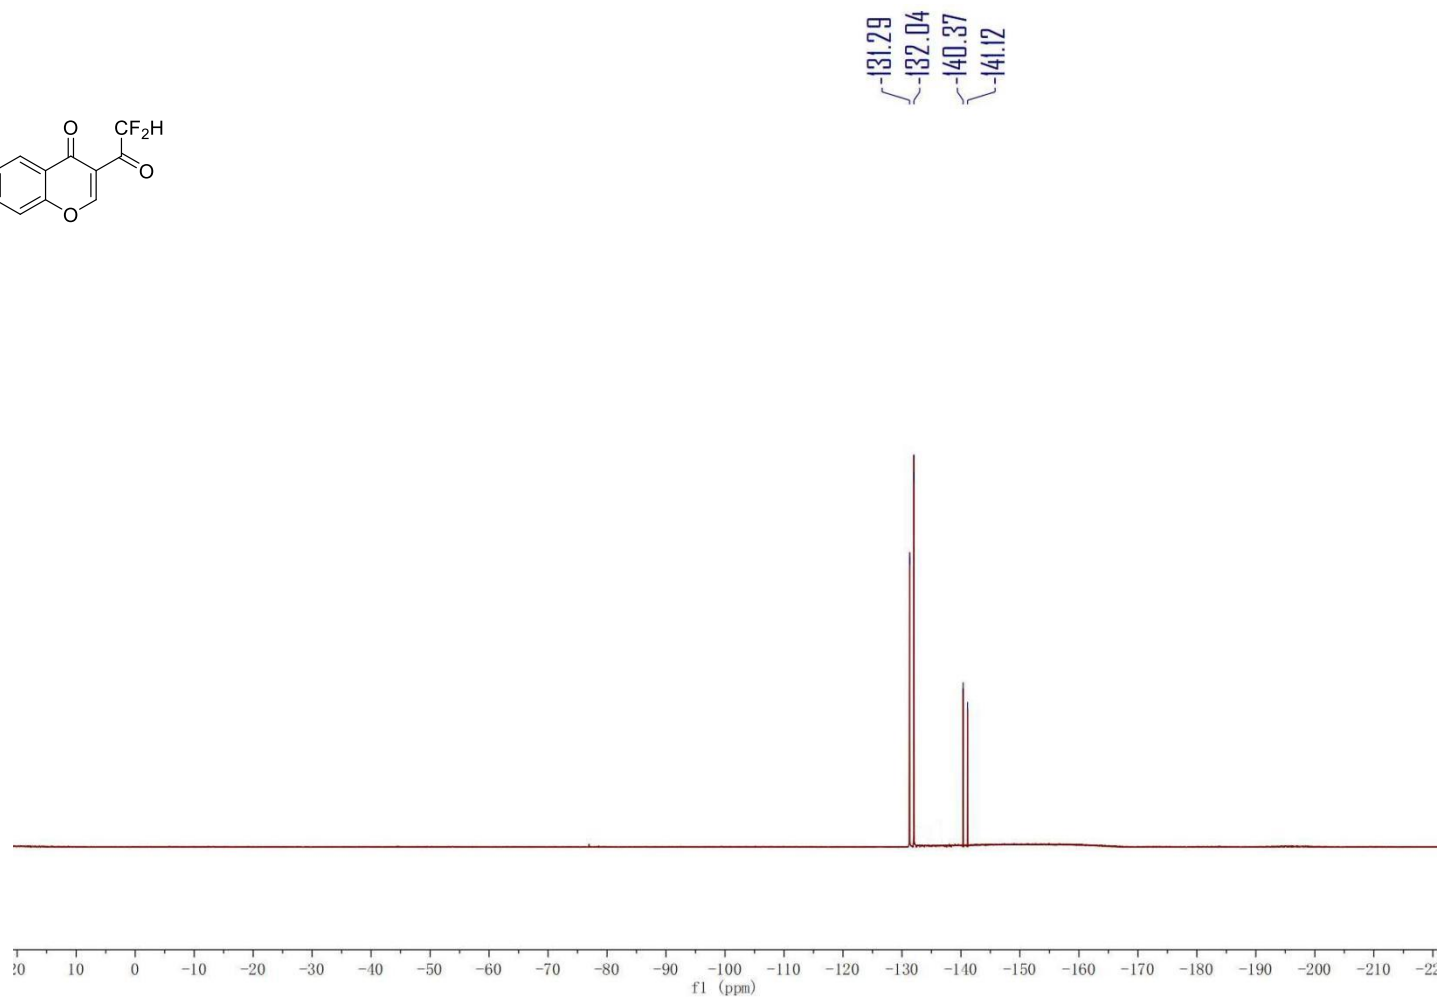

**Fig. S105.**  $^{19}\text{F}$  NMR spectrum of compound 6a

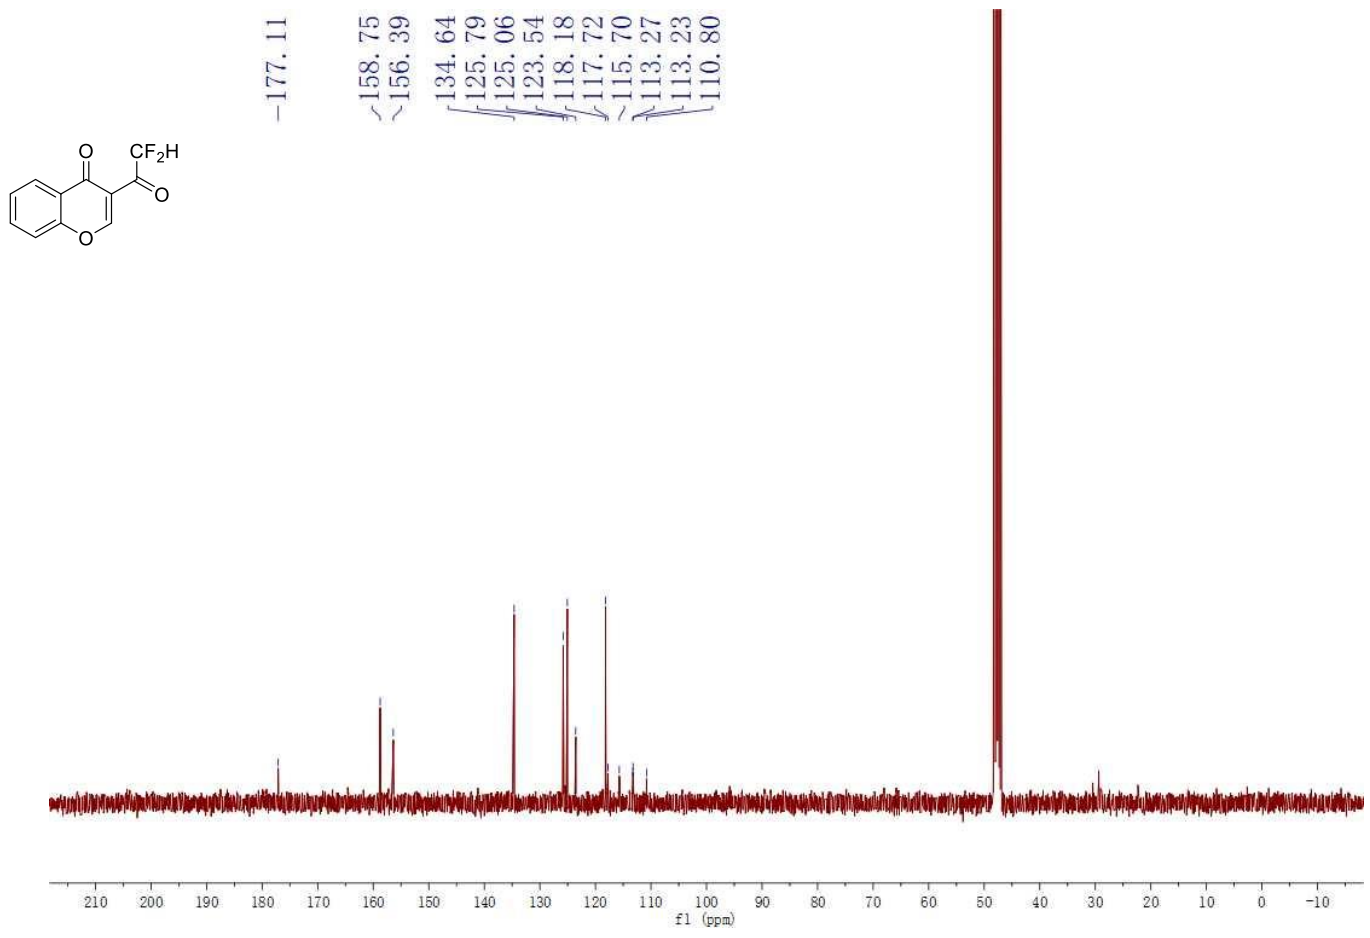

Fig. S106. <sup>13</sup>C NMR spectrum of compound 6a

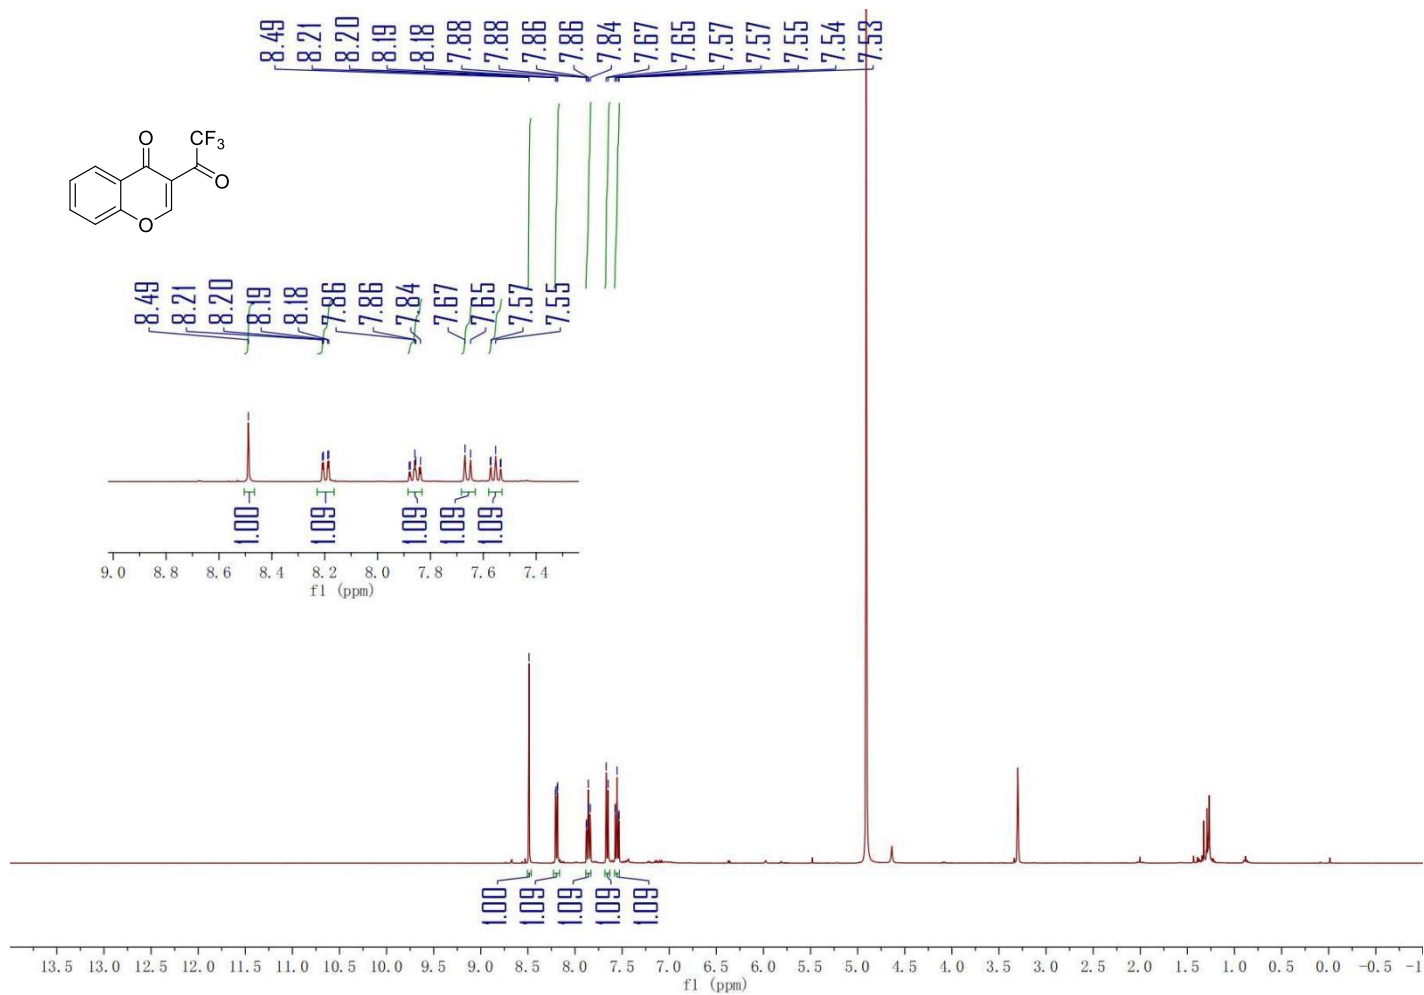

Fig. S107.  $^{13}\text{C}$  NMR spectrum of compound **6b**



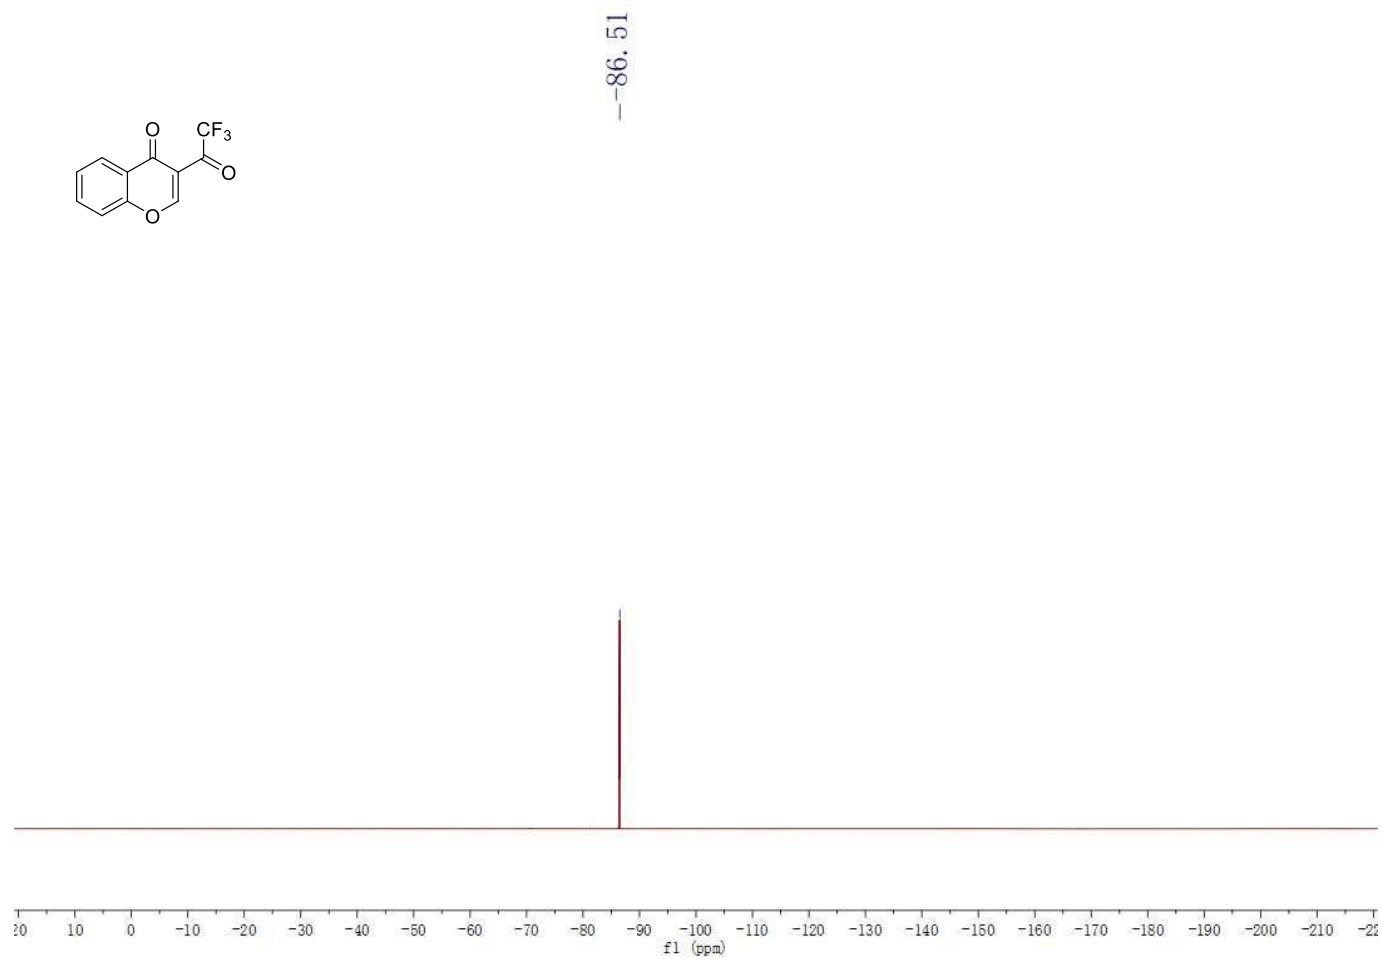

**Fig. S108.** <sup>19</sup>F NMR spectrum of compound **6b**

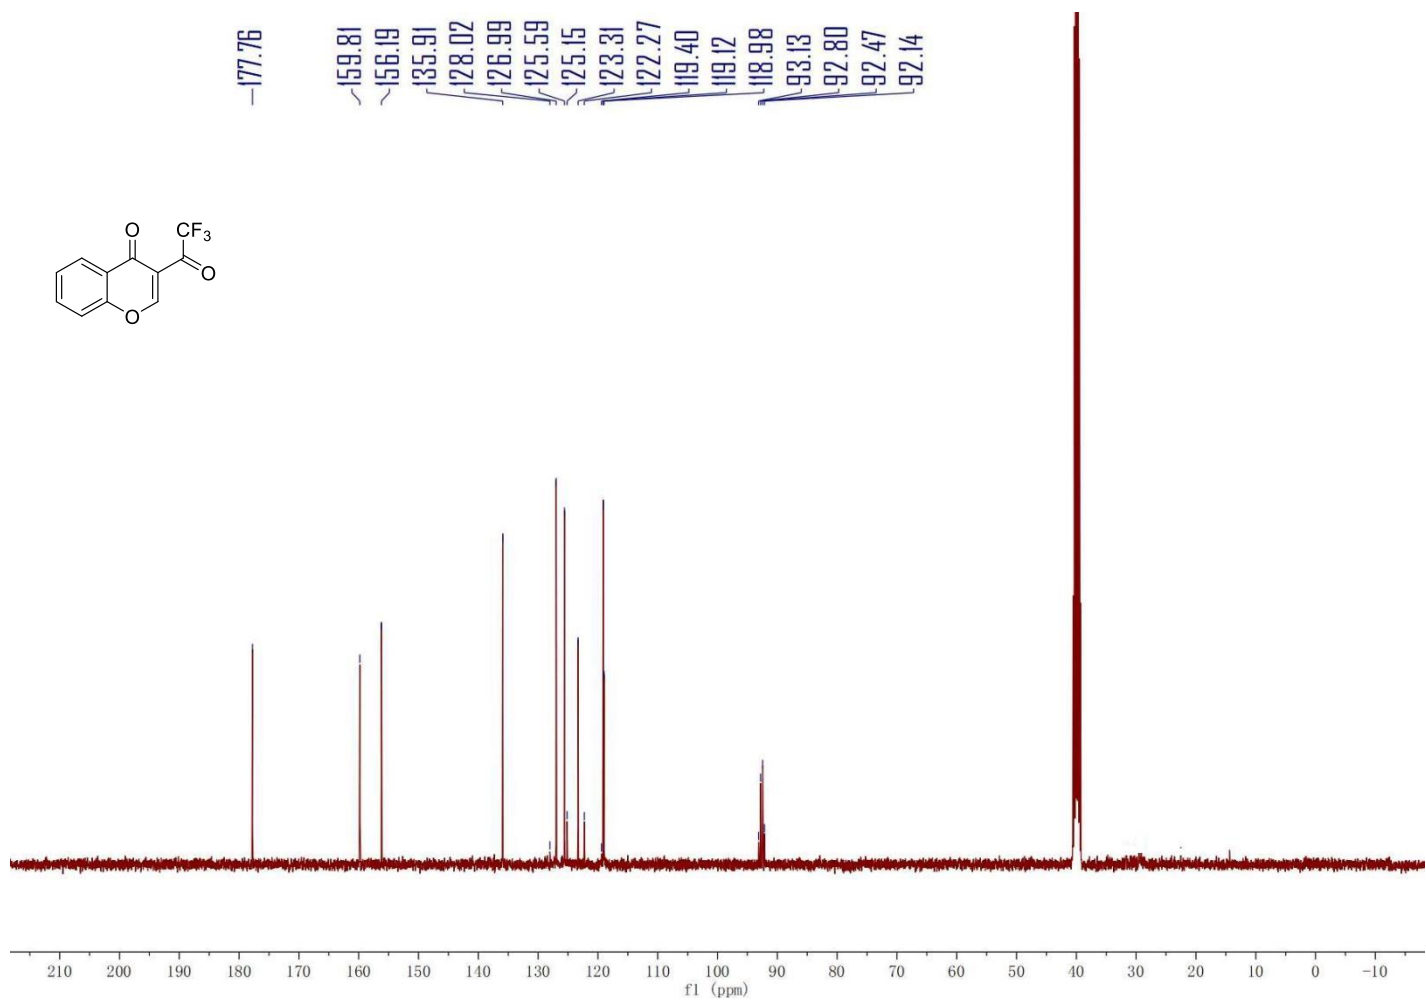

Fig. S109. <sup>13</sup>C NMR spectrum of compound 6b

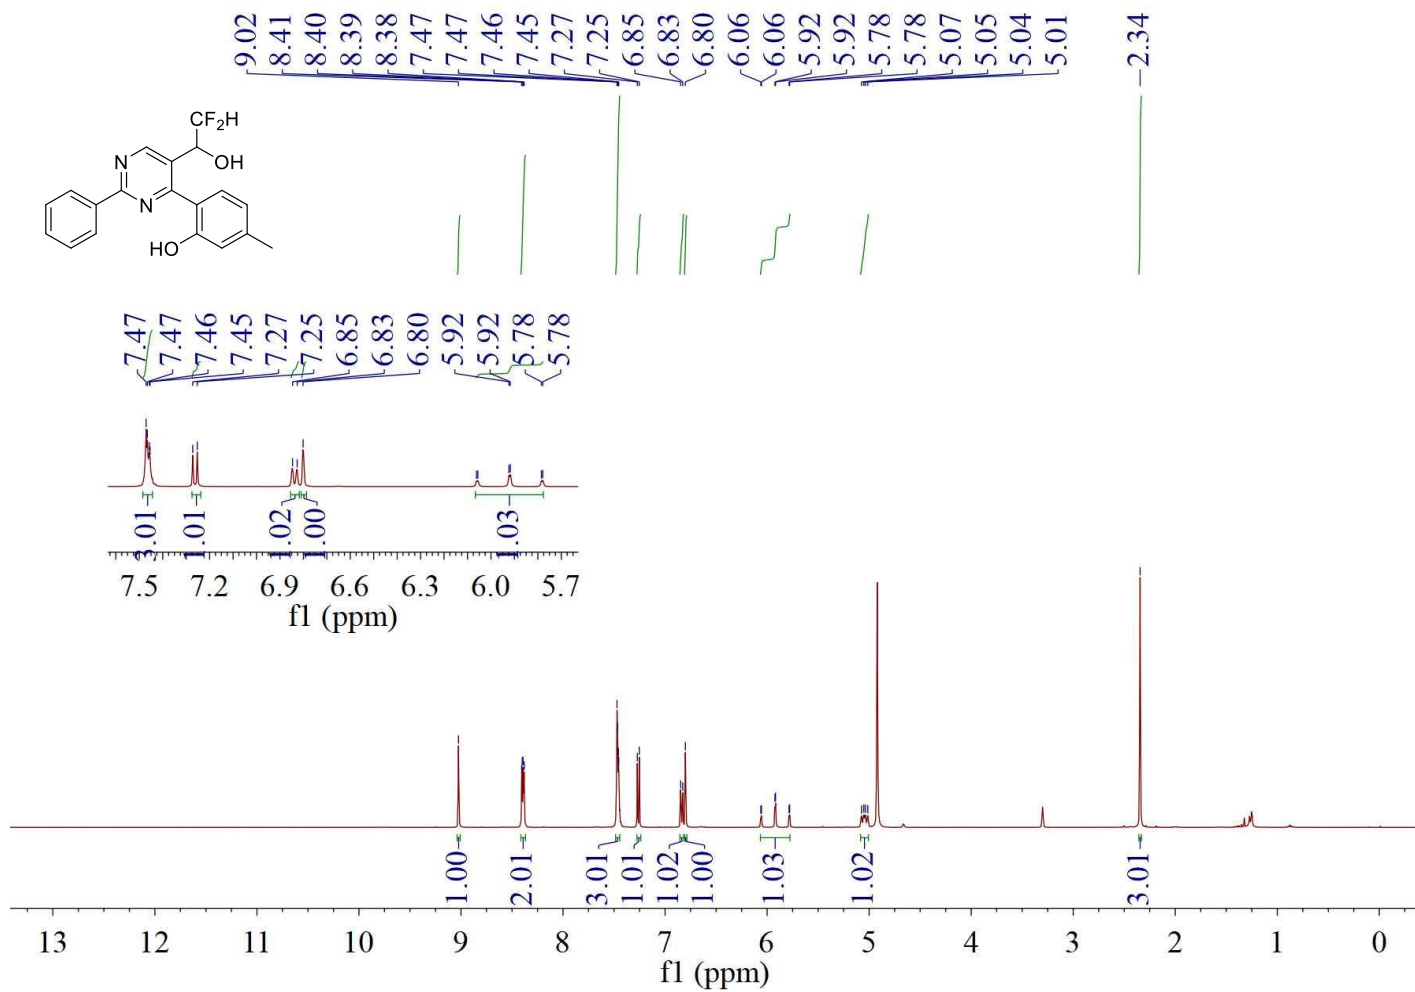

Fig. S110. <sup>1</sup>H NMR spectrum of compound 6c

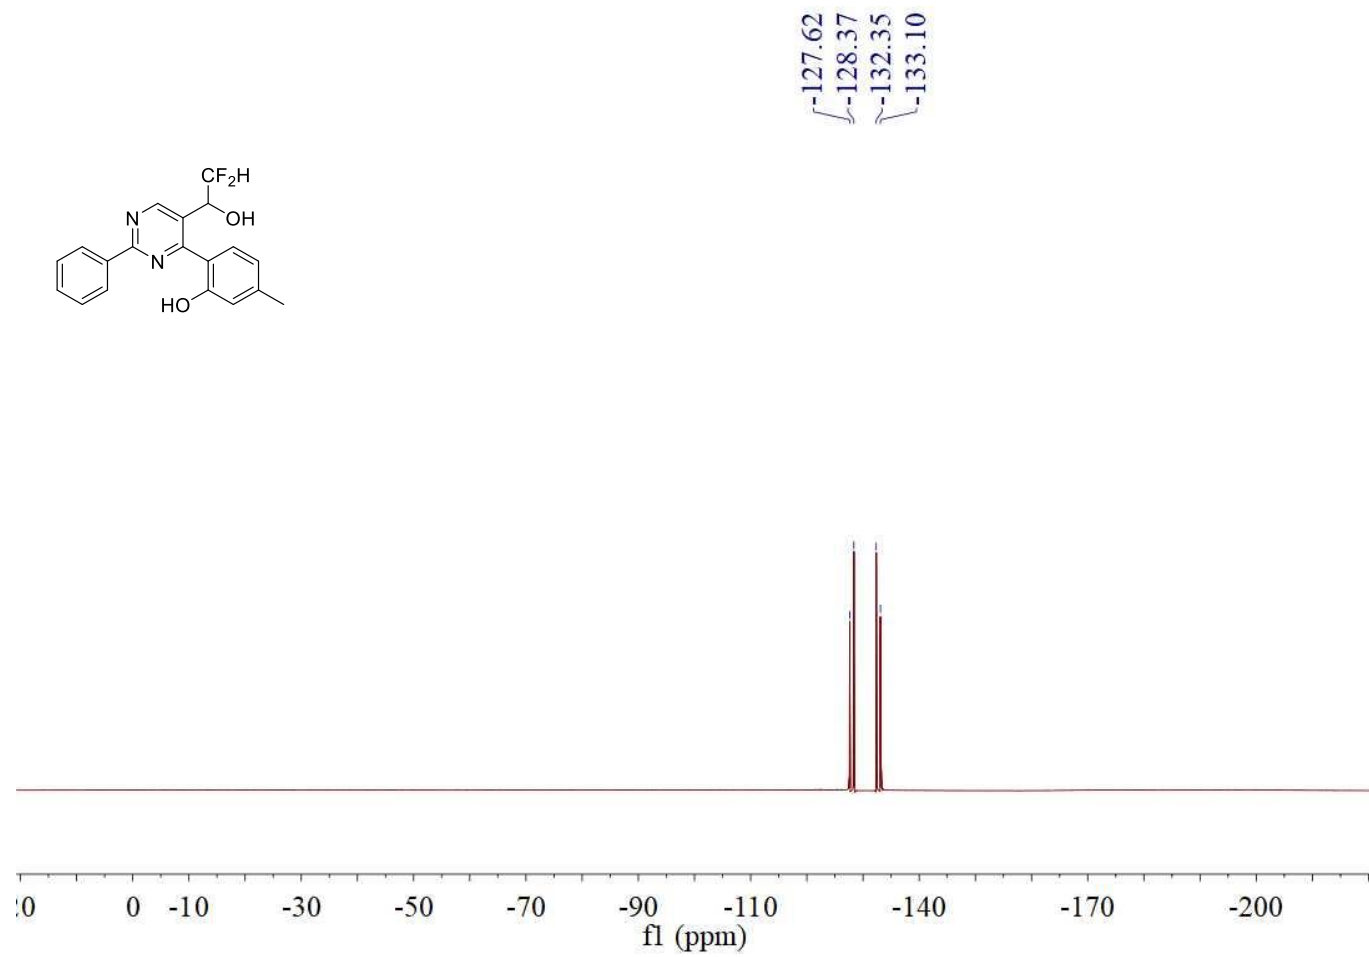

Fig. S111. <sup>19</sup>F NMR spectrum of compound 6c

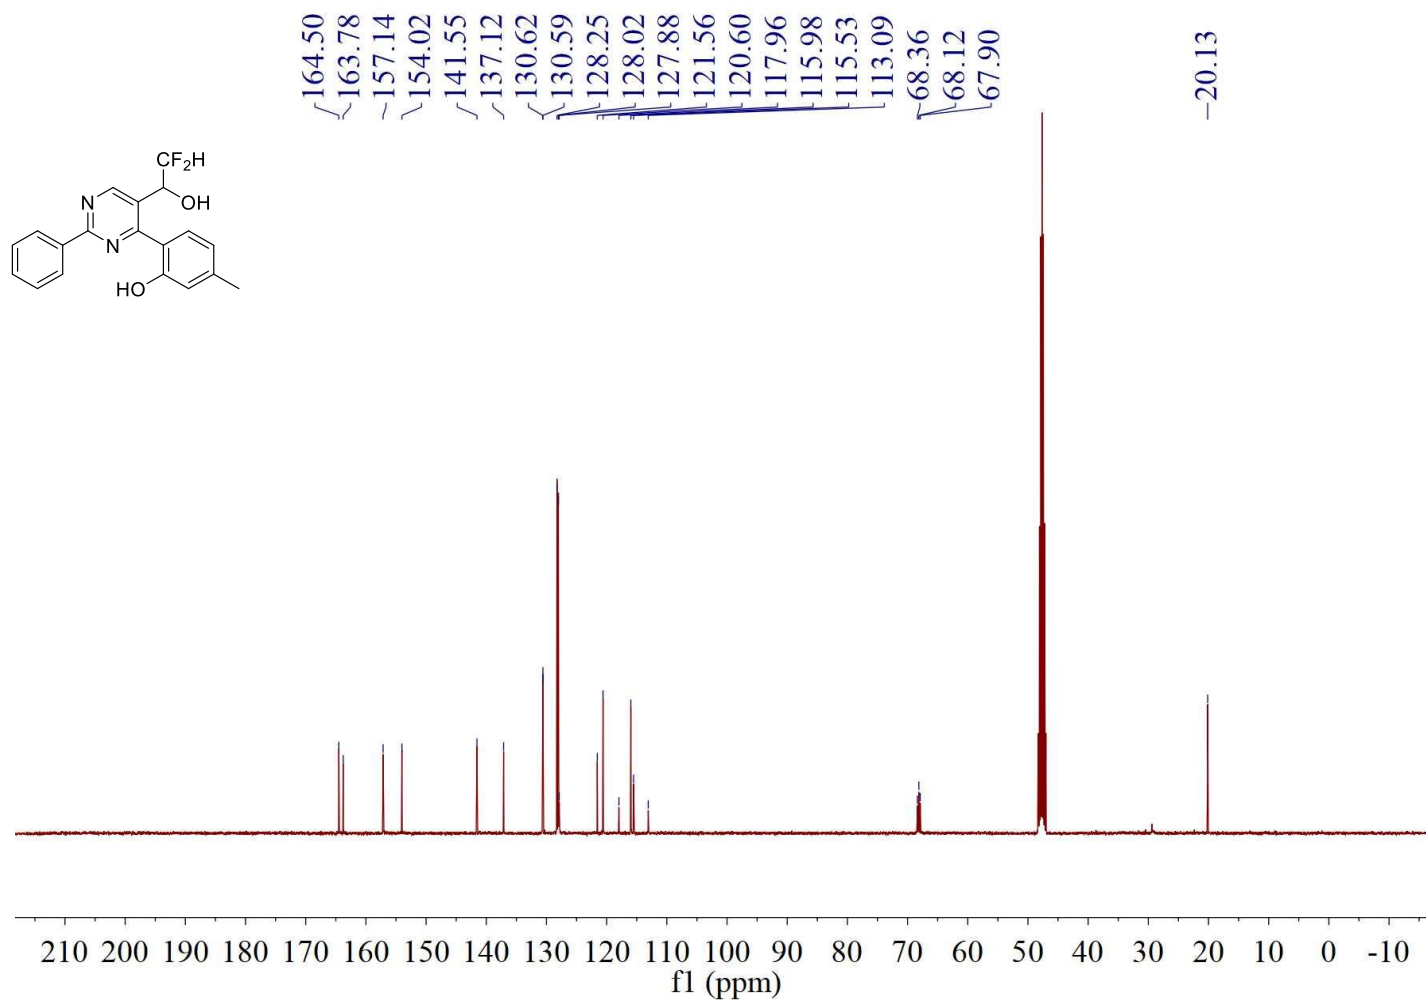

**Fig. S112.** <sup>13</sup>C NMR spectrum of compound 6c

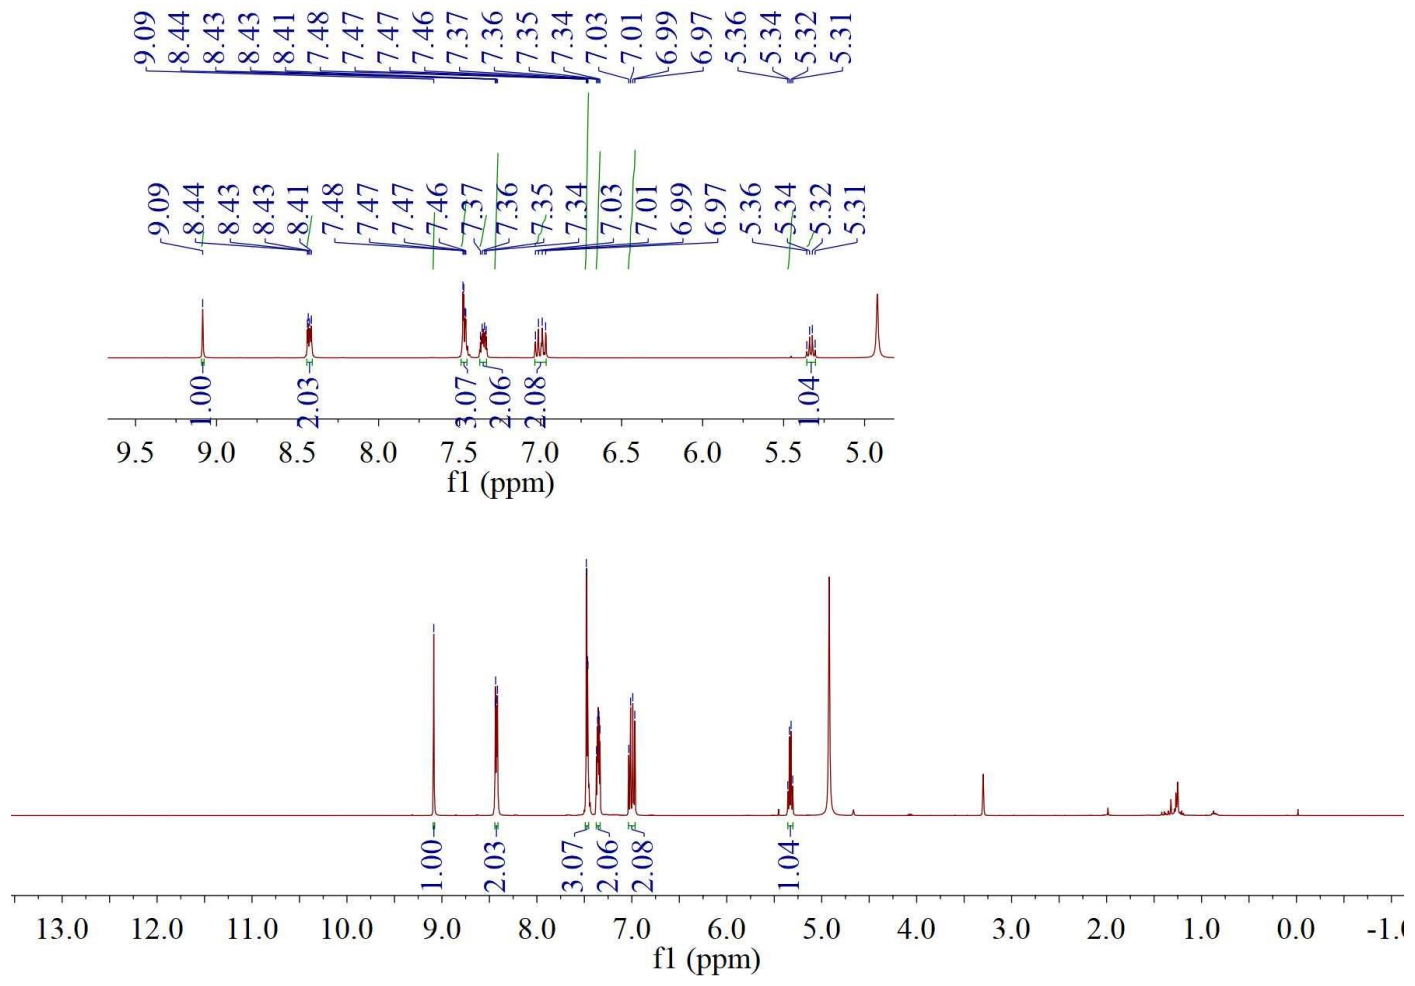

**Fig. S113.**  $^1\text{H}$  NMR spectrum of compound **6d**

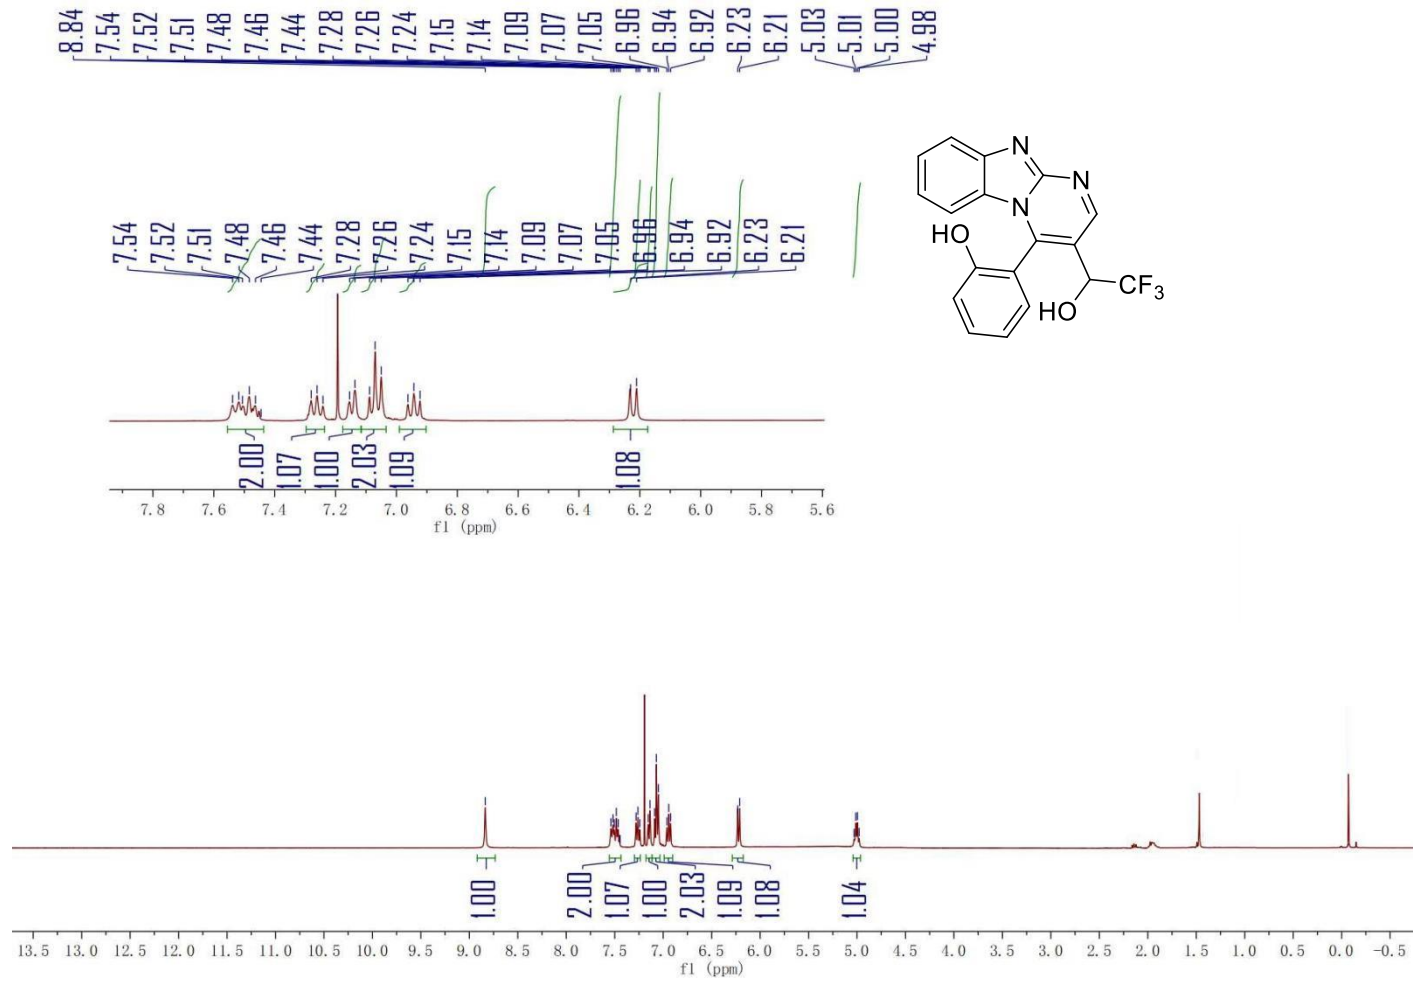

Fig. S114. <sup>1</sup>H NMR spectrum of compound **6e**

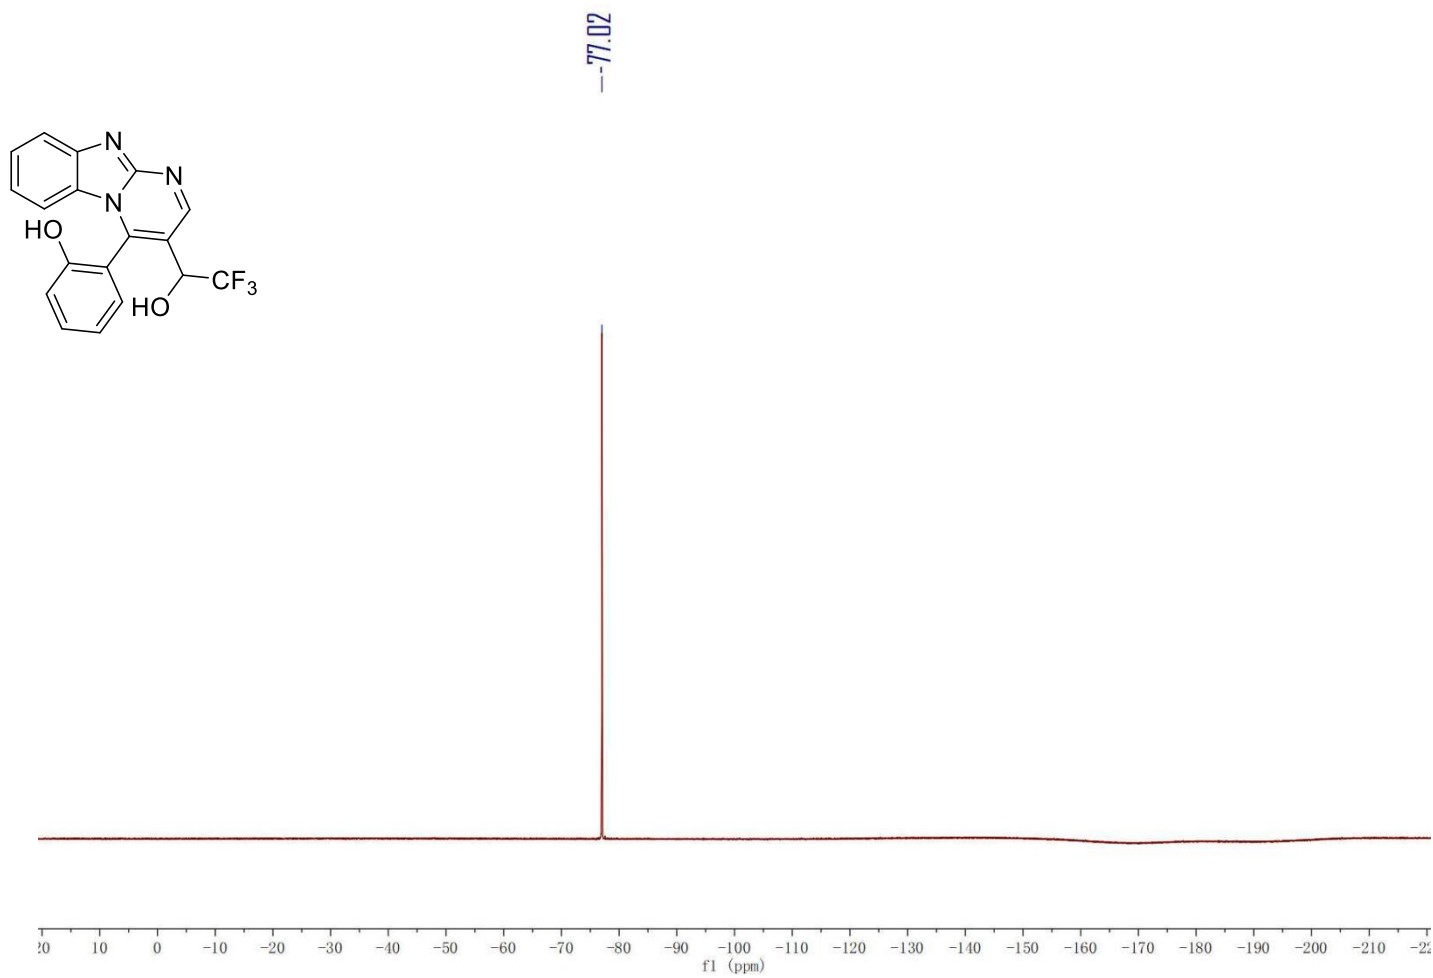

**Fig. S115.**  $^{19}\text{F}$  NMR spectrum of compound **6e**



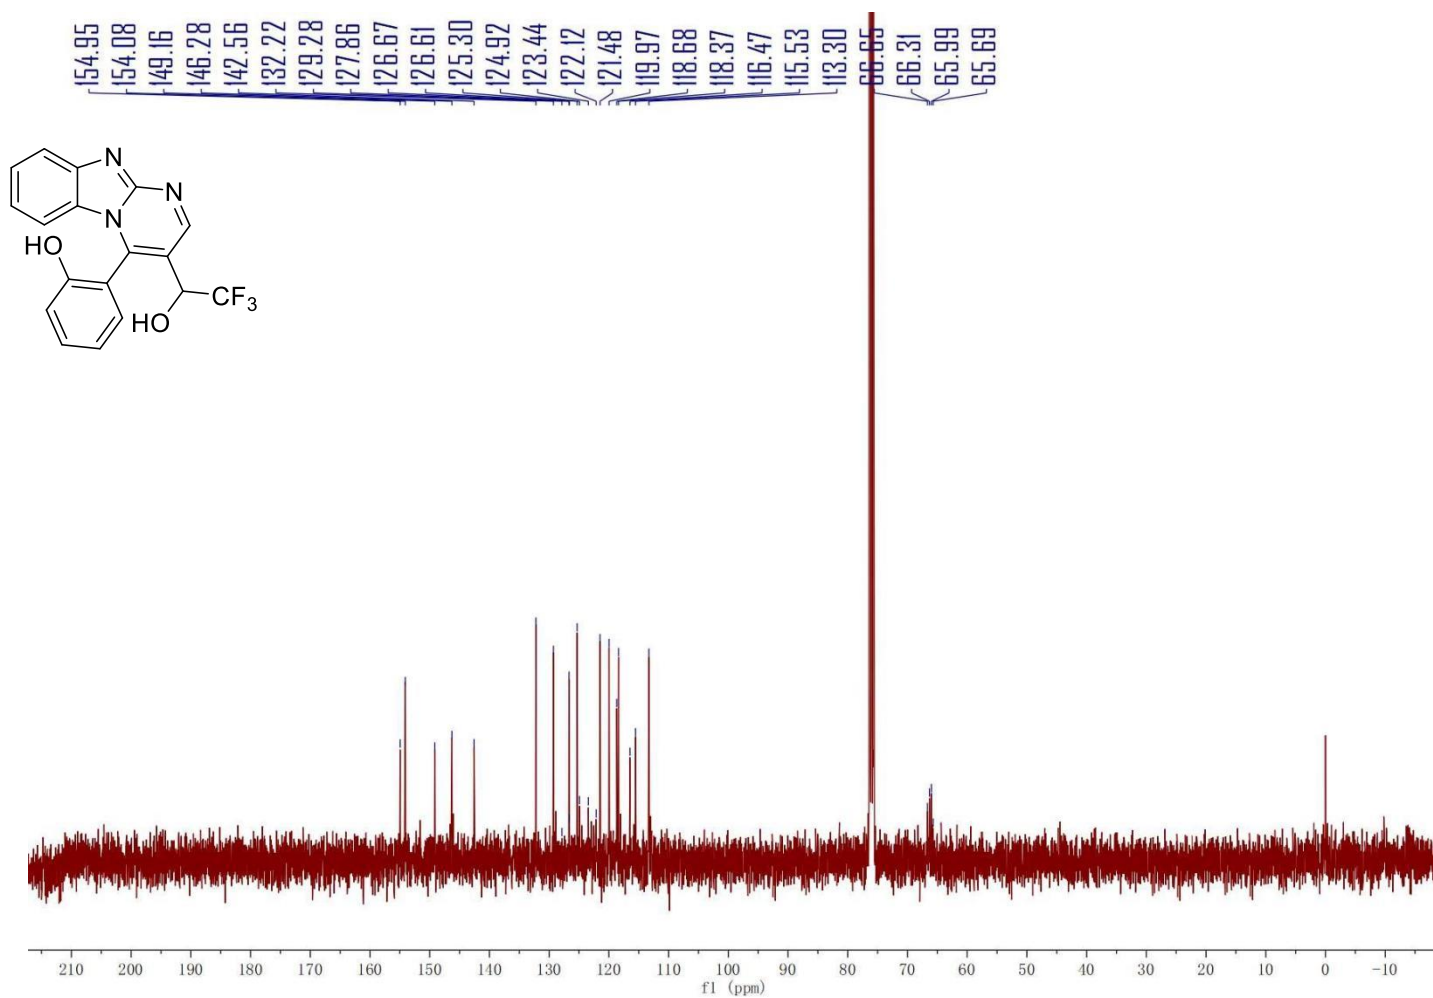

Fig. S116. <sup>13</sup>C NMR spectrum of compound 6e

## References

- [1] A. M. Eliassen, M. R. Chin, A. J. Axelrod, R. Abagyan and D. Siegel, *Tetrahedron*, 2018, **74**, 3238-3245.
- [2] M. O. Akram, S. Bera and N. T. Patil, *Chem. Commun.*, 2016, **52**, 12306-12309.
- [3] X. W. Zhang, G. Q. Jiang, S. H. Lei, X. H. Shan, J. P. Qu and Y. B. Kang, *Org. Lett.*, 2021, **23**, 1611-1615.
- [4] S. Y. Pan, M. S. Song, L. L. Zuo, X. Geng and L. Wang, *J. Org. Chem.*, 2023, **88**, 5586-5596.
- [5] V. Y. Sosnovskikh, R. A. Irgashev and M. A. Barabanov, *Synthesis*, 2006, **16**, 2707-2718.
- [6] A. Bornadiego, J. Diaz and C. F. Marcos, *Org. Biomol. Chem.*, 2019, **17**, 1410-1422.
